# Supplementary material for: Dynamic regulation of the transcription initiation landscape at single nucleotide resolution during vertebrate embryogenesis
Source: HighWire-hosted journal article supplement (doi:10.1101/gr.153692.112), 2013-09-03
Supplement: Supplemental_Tables.xlsx [file Supplemental_Tables.xlsx]

## Sheet: List of Tables
Supplementary Table 1.	CAGE and RNA analysis statistics for zebrafish and pufferfish
Supplementary Table 2.	CTSS statistics
Supplementary Table 3.	CAGE RNA seq correlation analysis
Supplementary Table 4.	Verification of annotated RefSeq and Ensembl genes by CAGE and RNA-seq and RNA-seq transcript coordinates
Supplementary Table 5.	H3K4me3 peaks (Stages: 30%Epiboly and Prim6)
Supplementary Table 6.	Novel intergenic TCs coordinates
Supplementary Table 7.	Alternative promoters
Supplementary Table 8.	Promoter function analysis
Supplementary Table 9.	AA initiator genes
Supplementary Table 10.	Intragenic CAGE tag coordinates
Supplementary Table 11.	Inter and intragenic TC statistics
Supplementary Table 12.	GO enrichment terms for CAGE tag classes
Supplementary Table 13.	Mismatching G removal statistics

## Sheet: Table 1
Supplementary Table 1 CAGE and RNA seqeuencing analysis statistics zebrafish and pufferfish
a) CAGE seqeuencing*
Danio rerio (danRer7)
Stages	Sequenced reads	Uniquely aligned reads	% of aligned tags	Ctss	TCs
					(>= 0.5tpm)
Unfertilized egg	8442488	6855567	81.2	506536	30788
Fertilized egg	5961050	4699167	78.83	613644	31537
64 cells	6029044	4712173	78.16	621738	32380
512 cells	5564030	4373472	78.6	701425	38010
High	4762698	3898315	81.85	562230	33730
Oblong	5033040	3788306	75.27	588592	36897
Sphere/dome	5963287	4491782	75.32	589938	33529
Dome/30% epiboly	6136697	4447139	72.47	584421	34296
Shield	6028251	4533359	75.2	348989	58545
14 somites	10595217	8232564	77.77	1045177	31488
Prim6	10496825	8008694	76.3	906641	33522
Prim20	8889836	6966370	78.36	871895	33678
Tetraodon (tetNig2)
2cells	6457017	3744519	57.99	836055	31107
46hpf	10086827	4768101	47.27	394505	65115
*Statistical analysis on mapping of CAGE tags to zebrafish genome (Zv9) and tetraodon genome (tetNig2). Only tag clusters (TCs) with 0.5 or more tpm were included.
b) RNA sequencing (Danio rerio)
Stages	Total Reads	%Mapped Reads
2-cells	36839844	77.5382
dome/30% epiboly	31048008	74.879
14somites	39164020	70.4147
prim6	39622904	76.076

## Sheet: Table 2
Supplementary Table 2. CTSS statistics
	Number of CTSS				Number of TCs
Stages	75% of CAGE tags	90% of CAGE tags	95% of CAGE tags	99% of CAGE tags	75% of CAGE tags	90% of CAGE tags	95% of CAGE tags	99% of CAGE tags
UnfertilizedEgg	52060	186262	320372	469303	3291	7589	11856	22610
FertilizedEgg	64143	230673	388515	568618	3453	7987	12615	23887
64cells	63562	230350	388732	575136	3584	8305	13065	24526
512cells	77009	282602	469063	654952	3468	8519	14184	28312
High	60178	216439	364922	522768	3296	7829	12641	24858
Oblong	68201	241881	389654	548804	3374	8462	14076	28095
Sphere/dome	81970	263854	424386	556827	3316	7932	12793	25210
Dome/30pEpiboly	88737	273112	422013	551939	3251	7943	13077	26073
Shield	74015	199864	274426	334076	3396	10785	23039	48234
Somites	129401	485554	765365	989214	3541	7799	11652	22531
Prim6	118026	424375	665508	858414	3686	8197	12167	23573
Prim20	121481	436743	654319	828379	3963	8772	12991	24608

## Sheet: Table 3
Supplementary Table 3. CAGE RNA seq correlation analysis
	1stExonStarts	1stExonEnds	Gene RefSeq ID	#exons	strand		Rseq_2cell	Rseq_30pdome	Rseq_somites	Rseq_prim6		cage_fertEgg	cage_30pdome	cage_somites	cage_prim6		corel
chr1	50321633	50322231	NM_131426	11	+		80.6644	16.4875	16.1319	19.3639		47.679	43.814	10.82	8.876		0.620521
chr1	22042525	22042663	NM_001089491	24	-		10.7626	3.74101	5.7482	1.83453		21.067	6.631	18.62	15.051		0.650671
chr1	17825395	17825568	NM_001006077	12	+		7.62069	38.6379	19.1034	9.25862		177.409	172.412	105.809	37.435		0.420061
chr1	46134445	46134472	NM_001002482	3	+		12.2857	0.964286	3.67857	3.46429		90.922	33.63	84.043	73.327		0.724347
chr1	44067004	44067072	NM_001002577	9	-		15.971	13.2174	49.1594	140.768		86.93	28.42	144.056	267.192		0.966006
chr1	59764237	59764512	NM_200224	11	+		31.3478	9.48188	1.4529	0.92029		37.921	21.315	14.091	9.391		0.985814
chr1	53794	54138	NM_201027	12	+		30.2145	4.77101	22.5449	18.4377		150.132	104.205	124.681	78.987		0.622788
chr1	7597406	7597510	NM_001076648	5	+		8.28571	10.0857	3.54286	1.64762		125.295	165.071	56.113	77.572		0.918228
chr1	8080814	8081091	NM_201029	17	+		14.446	4.48921	5.70144	4.03597		3.992	5.684	1.761	2.702		0.111199
chr1	8934513	8934605	NM_200912	18	-		46.5269	10.6774	1.30108	1.24731		145.697	166.018	41.77	23.67		0.646055
chr1	12852759	12852898	NM_199219	7	-		3.75714	1.18571	6.77857	0.985714		37.256	92.601	46.551	37.178		-0.354896
chr1	21625839	21625980	NM_212731	8	+		15.0423	24.9296	17.338	4.71831		404.714	320.668	121.662	71.783		0.574687
chr1	22146680	22146986	NM_001079967	16	+		47.8502	11.5081	7.67101	1.58958		110.659	115.573	15.349	16.08		0.666622
chr1	24508359	24508466	NM_213440	15	+		68.037	109.824	49.3333	27.5093		143.258	198.464	124.429	65.351		0.979355
chr1	27762582	27762679	NM_001114584	19	-		6.84694	2.11224	6.31633	8.05102		27.72	11.131	32.082	27.015		0.874723
chr1	27791986	27792063	NM_001017828	8	-		5.88462	2.88462	3.03846	5.74359		80.278	29.367	44.286	29.331		0.471241
chr1	28807324	28807402	NM_001002746	23	+		0.746835	0.683544	4.34177	1.50633		27.942	42.156	41.141	29.588		0.430134
chr1	29624296	29624482	NM_001080561	9	-		5.10695	6.09091	3.77005	2.17112		23.285	10.657	8.555	8.619		0.437304
chr1	33045191	33045240	NM_001079980	15	-		5.78	20.06	1.02	18.5		17.519	23.683	17.236	51.457		0.653851
chr1	34346279	34346383	NM_198140	6	-		756.905	1542.25	3247.25	5587.58		258.574	267.144	1512.78	1471.29		0.871869
chr1	35203451	35203604	NM_213357	9	+		8.59091	5.25974	15.7468	6.22727		26.39	52.576	58.629	39.879		0.419493
chr1	35498196	35498876	NM_001080012	13	+		1.06755	0.283407	11.3201	7.62849		20.402	7.342	146.573	166.593		0.926222
chr1	36480190	36480616	NM_001045250	23	+		68.1475	4.70492	9.2623	4.74707		49.453	36.946	23.905	21.098		0.833401
chr1	36430236	36430704	NM_001145596	10	+		13.1322	5.27719	9.7484	3.54158		103.119	111.073	72.846	65.865		0.30049
chr1	41754991	41755089	NM_131018	67	-		1.0202	0.545455	4.60606	2.53535		23.95	28.42	1.384	45.668		-0.543107
chr1	41005827	41006034	NM_203321	19	+		86.6538	11.0913	34.9808	9.39423		163.66	85.496	57.497	39.365		0.880381
chr1	46902579	46902655	NM_001004513	22	+		58.2987	21.026	16.974	16.7662		22.398	22.736	24.785	24.957		-0.727885
chr1	49921715	49922147	NM_001037431	12	+		51.9284	46.7367	26.3141	36.2517		53.444	67.497	33.718	42.195		0.825118
chr1	52955336	52955985	NM_001145359	4	-		22.9523	179.928	122.848	16.3338		232.406	118.889	157.77	25.471		0.0394968
chr1	54275130	54275395	NM_200583	13	-		32.9699	59.1504	380.797	537.241		148.802	105.863	255.024	286.103		0.963103
chr1	55429227	55429355	NM_001077291	12	+		7.16279	1.43411	2.34109	2.41085		3.105	2.368	3.397	5.403		-0.100922
chr1	55705740	55705939	NM_205590	6	-		74.595	62.745	17.39	35.105		89.148	51.866	21.262	23.67		0.923839
chr1	60290532	60290626	NM_201088	26	+		1.18947	6.14737	10.7368	4.52632		528.679	325.168	36.234	50.685		-0.734448
chr1	59997891	59998217	NM_201038	8	+		27.0214	55.685	145.627	165.645		41.469	54.234	131.098	197.725		0.961507
chr1	53475	53546	NM_001007381	15	-		8.34722	9.29167	14.3333	8.84722		150.132	104.205	124.681	78.987		0.132763
chr1	66401	66662	NM_213402	5	-		23.7595	15.2863	7.17939	29.1794		3.77	5.447	6.416	6.818		-0.136939
chr1	101972	102069	NM_200776	12	+		46.0918	8.13265	34.0816	11.6939		24.394	43.814	49.696	44.639		-0.605348
chr1	89511	89602	NM_001002156	8	-		10.7065	13.9783	5.81522	27.413		28.607	17.999	27.805	43.224		0.697613
chr1	228588	228805	NM_001077323	14	-		211.064	44.0275	16.922	13.2018		50.783	75.075	14.72	17.624		0.396575
chr1	134729	134837	NM_001076721	10	+		164.872	2.88991	42.0183	20.1927		131.061	81.943	82.282	84.133		0.975792
chr1	212828	212959	NM_199978	15	-		86.8636	12.053	24.9167	40.5379		7.318	8.289	30.069	34.476		-0.294632
chr1	368993	369079	NM_001144803	7	+		15.1379	7.90805	1.82759	0.45977		138.601	198.464	44.412	53.258		0.691071
chr1	369053	369079	NM_213006	9	+		28.963	10.3333	5.18519	1.48148		138.601	198.464	44.412	53.258		0.513305
chr1	388739	388916	NM_001037123	4	+		59.6517	2.53371	7.76404	5.91011		39.252	8.052	21.64	16.724		0.935291
chr1	388285	388445	NM_001007332	5	-		1.36025	6.79503	11.9876	7.36646		39.252	8.052	21.64	16.724		-0.573543
chr1	489238	489280	NM_213307	3	-		2.4186	3.51163	30.814	36.4186		11.753	8.289	36.612	40.265		0.99317
chr1	469333	469469	NM_001098264	10	+		110.883	19.1752	29.9708	63.7591		23.728	20.841	61.9	90.05		-0.0897096
chr1	407554	407596	NM_199915	20	+		18.0233	18.6047	1.83721	2.39535		69.633	28.656	21.766	21.226		0.67131
chr1	399413	399575	NM_001007764	6	+		3.17178	2.05521	43.7117	25.6258		20.402	5.684	52.59	84.647		0.713213
chr1	588024	588136	NM_001017766	12	-		426.513	218.088	137.566	249.274		33.486	48.313	53.597	47.855		-0.993632
chr1	603945	603993	NM_198371	11	-		47.5918	9.34694	2.7551	4.46939		40.361	77.68	245.462	769.03		-0.533322
chr1	628785	628828	NM_131438	11	+		0.25	6.18182	0.5	2.93182		78.725	116.994	29.818	43.996		0.689936
chr1	566148	566342	NM_200393	8	+		69.641	8.14359	11.0462	15.8667		34.151	23.683	12.078	25.6		0.768498
chr1	628768	628828	NM_001077762	11	+		0.459016	5.85246	0.360656	2.11475		78.725	116.994	29.818	43.996		0.775681
chr1	579101	579246	NM_001017577	6	-		3.02055	14.7945	61.8699	62.4863		63.867	47.366	90.963	159.904		0.786175
chr1	571454	571648	NM_199632	10	+		127.744	36.6821	41.3846	55.3077		13.749	5.921	40.889	25.471		-0.279899
chr1	604200	604229	NM_173235	6	+		39.3333	12.4	167.533	310.433		40.361	77.68	245.462	769.03		0.961706
chr1	628768	628828	NM_001039974	9	+		0.459016	5.85246	0.360656	2.11475		78.725	116.994	29.818	43.996		0.775681
chr1	769033	769095	NM_207058	10	+		5.50794	4.36508	12.3651	8.52381		16.632	8.052	26.295	39.365		0.642472
chr1	776250	776626	NM_001080690	6	+		45.4058	9.4244	21.3793	46.4032		240.611	58.734	13.085	18.01		0.418941
chr1	977846	977910	NM_001002502	8	+		10.4769	7.24615	3.47692	1.52308		15.745	13.736	19.124	20.068		-0.811399
chr1	1468954	1469142	NM_131686	22	+		182.915	188.524	62.127	129.397		91.144	177.859	198.911	176.885		-0.628789
chr1	2017232	2017310	NM_001145604	26	+		173.456	39.0253	213.506	352.734		182.953	235.409	260.056	167.494		-0.543244
chr1	4311590	4311686	NM_001017630	8	+		8.62887	0.783505	2.41237	1.8866		39.917	52.576	39.883	43.224		-0.606712
chr1	4291637	4291837	NM_200691	4	+		2.93035	1.51244	34.6318	64.5124		4.879	4.737	155.505	191.164		0.963285
chr1	4375006	4375066	NM_001082796	15	+		3.60656	3.55738	51.3934	51.8689		33.929	22.499	22.898	29.073		-0.231896
chr1	5025648	5025812	NM_199928	8	+		36.5091	24.7212	9.87879	18.8364		87.374	91.653	24.785	42.967		0.86887
chr1	4998847	4998994	NM_001145693	20	+		69.8986	8	0.972973	0.391892		172.53	170.518	4.278	16.595		0.663459
chr1	5053615	5053906	NM_001080014	9	+		46.976	1.53767	3.32534	1.56849		36.812	48.787	13.462	17.11		0.289242
chr1	5509779	5509949	NM_213314	12	+		103.965	37.0409	30.4094	39.8889		31.49	16.341	30.573	24.828		0.482197
chr1	6541025	6541059	NM_001009891	11	-		2.68571	7	4.22857	14.9143		8.649	19.42	18.117	23.542		0.82111
chr1	6501472	6501534	NM_001006035	5	-		6.1746	16.9683	28.6825	25.6349		20.624	20.367	38.121	38.593		0.884329
chr1	6760432	6761035	NM_200162	4	+		111.76	131.288	67.9636	19.8063		53.001	42.393	25.163	11.707		0.916147
chr1	7584836	7585873	NM_001077387	4	+		71.1724	83.3198	31.6021	58.1435		53.888	31.972	18.998	20.969		0.597411
chr1	7722839	7723015	NM_001030245	5	-		4.54802	27.5819	3.62712	15.3898		24.394	11.842	7.046	10.677		-0.246034
chr1	7728662	7728705	NM_131031	6	-		46.1591	273.477	953.273	1980.05		112.877	108.231	136.13	408.957		0.927221
chr1	7629271	7629375	NM_001013300	21	-		160.514	47.7524	5.79048	1.1619		246.377	240.383	18.369	10.42		0.795349
chr1	7770279	7770630	NM_199602	4	+		298.821	137.094	91.9233	101.673		96.244	54.234	72.343	71.011		0.765764
chr1	7770231	7770630	NM_001245081	5	+		263.29	120.815	80.9375	89.4975		96.244	54.234	72.343	71.011		0.765478
chr1	8229270	8229910	NM_001003890	11	+		989.619	56.3261	147.164	86.1576		705.201	398.348	167.458	144.595		0.869193
chr1	8199327	8199513	NM_001003418	5	-		98.4973	81.6096	117.465	193.401		149.911	113.679	335.922	336.917		0.778774
chr1	8275121	8275327	NM_001110102	22	+		7.657	12.5652	12.8792	3.21739		46.126	32.209	13.21	11.063		0.139884
chr1	8561851	8562023	NM_001199364	10	-		743.728	26.1734	6.53757	3.96532		322.885	87.627	19.627	10.549		0.977855
chr1	8961313	8961408	NM_200325	9	-		3.55208	2.21875	4.21875	12		78.06	35.761	26.169	36.663		-0.209805
chr1	8936464	8936832	NM_200084	8	+		2.64228	1.17886	10.5501	10.9539		2.439	5.447	40.638	3.473		0.528044
chr1	9124476	9124582	NM_200308	10	-		7.70093	2.19626	2.88785	10.486		41.913	13.262	19.627	31.389		0.794872
chr1	9473129	9473268	NM_001200009	8	+		26.6643	20.0286	251.514	259.536		27.942	22.736	157.015	217.407		0.972871
chr1	9649513	9649691	NM_001039805	6	-		23.1173	29.5866	4.65363	3.78212		91.366	58.971	10.065	9.648		0.85692
chr1	10068691	10068832	NM_131785	17	-		6.1831	4.30986	19.9507	22.8732		14.414	19.183	58.377	46.955		0.925437
chr1	10291293	10291314	NM_001128774	8	+		82.7273	26.5909	15.2727	69.6364		48.566	13.026	100.902	44.639		-0.292594
chr1	10870585	10870621	NM_001040305	14	-		8.32432	1.89189	7.91892	5.81081		2.661	4.026	6.291	6.046		0.0544996
chr1	11221226	11221304	NM_200471	9	-		2.68354	1.41772	6.35443	6.01266		8.427	6.631	7.171	6.689		-0.205313
chr1	11225358	11225771	NM_001082799	4	+		8.80193	5.36232	9.49275	16.744		3.77	6.394	24.408	21.741		0.626694
chr1	11240614	11240844	NM_001076589	6	-		21.5152	5.00866	2.65368	4.25108		80.499	30.788	17.74	14.279		0.982145
chr1	11644389	11644637	NM_213045	7	+		309.422	144.153	276.032	466.365		157.672	76.496	68.694	95.968		0.267527
chr1	11591628	11591678	NM_200883	12	+		61.549	26	10.6471	6.07843		51.227	61.576	46.425	39.879		0.435534
chr1	11632039	11632229	NM_206829	6	+		48.0105	99.6649	51.1047	57.3298		217.104	86.206	54.477	51.972		-0.25866
chr1	11690634	11690959	NM_200896	5	+		226.239	200.175	22.454	33.7914		139.488	145.651	22.269	20.454		0.989446
chr1	12905189	12905270	NM_001005769	8	+		368.915	124.146	23.0488	15.3902		257.243	184.728	68.82	35.763		0.931602
chr1	13290889	13291121	NM_201120	6	+		89.3605	47.5408	48.8155	49.0815		94.914	28.893	27.553	31.518		0.998763
chr1	13267563	13267845	NM_001006042	17	+		8.65371	48.0212	82.3958	75.6749		37.921	28.893	85.05	73.455		0.801145
chr1	13985427	13985925	NM_001045485	10	+		184.411	65.8978	20.4729	22.8918		51.449	37.182	19.375	13.379		0.933294
chr1	15204973	15205418	NM_199990	12	+		10.1076	8.67265	7.33184	6.83857		43.465	15.868	16.482	10.163		0.898417
chr1	15430710	15430860	NM_001017793	11	-		11.457	33	26.3377	9.96689		111.546	103.258	74.482	18.139		0.433815
chr1	16269272	16269348	NM_131877	7	+		47.4026	34.5584	28.974	47.5844		60.984	88.811	20.759	35.248		0.0984163
chr1	16437320	16437478	NM_001145614	4	+		2.14465	0.955975	3.76101	0.955975		19.737	7.105	24.785	11.192		0.946726
chr1	16453169	16453249	NM_198810	12	-		3.75309	6.91358	9.95062	13.7284		79.169	27.472	16.23	18.782		-0.820031
chr1	17356775	17356928	NM_131859	7	-		1.7987	4.64286	4.83766	0.74026		7.54	12.789	19.501	12.092		0.666013
chr1	17707644	17707966	NM_001145577	22	+		7.41796	1.9257	6.73994	6.11146		3.105	13.262	10.191	20.969		-0.33328
chr1	18173192	18173405	NM_001114847	13	-		1.89252	0.836449	11.4907	12.2897		66.528	53.997	35.731	35.377		-0.914214
chr1	18280193	18280456	NM_199542	24	+		154.246	3.2803	25.9924	9.72348		81.386	65.602	50.2	33.447		0.740912
chr1	18341106	18341128	NM_001162486	49	-		1.56522	2.86957	2.21739	0.956522		128.622	77.443	45.67	87.863		-0.437969
chr1	18390029	18390122	NM_001020704	12	-		3.70213	4.32979	14.9255	1.2234		51.67	15.631	29.44	16.724		0.107894
chr1	18391422	18391547	NM_001102393	6	+		98.2698	19.7063	2.76984	9.69841		53.001	43.814	6.542	6.818		0.790627
chr1	18505826	18505933	NM_001177745	7	-		26.6296	62.75	8.73148	4.21296		42.356	34.34	19.879	2.702		0.667068
chr1	18811673	18811831	NM_207071	11	-		65.1509	31.3585	18.2956	19.3836		98.019	59.208	33.341	22.255		0.970701
chr1	20092041	20092216	NM_001007770	4	+		115.727	18.4261	75.892	28.6477		197.589	167.676	116.503	93.138		0.492702
chr1	20345988	20346057	NM_001037378	14	+		0.814286	4.71429	1.18571	5.9		58.101	58.023	46.048	77.701		0.775778
chr1	20345599	20345692	NM_200330	35	-		19.1809	1.59574	10.0532	8.62766		58.101	58.023	46.048	77.701		-0.0910148
chr1	20772179	20772249	NM_001083851	22	+		15.7887	2.83099	2.14085	1.19718		444.632	152.282	63.913	44.768		0.985006
chr1	21577021	21577241	NM_001123250	14	-		4.9276	1.37557	7.78733	1		29.716	19.42	17.991	14.665		0.309469
chr1	22048825	22048954	NM_001110401	11	+		10.1692	17.7692	3.92308	3.46154		53.223	44.05	113.735	111.148		-0.92693
chr1	22144486	22144614	NM_200992	33	-		50.8062	16.0388	13.4186	21.6589		283.411	257.671	214.764	196.824		0.686377
chr1	22085710	22086228	NM_001008611	7	+		28.3776	141.222	15.3102	7.88439		70.077	96.627	28.182	11.964		0.852329
chr1	22068372	22068476	NM_001110402	12	-		45.9619	7.85714	20.8762	5.50476		122.412	99.942	56.868	59.433		0.638293
chr1	22048085	22048131	NM_001003861	6	-		82.2128	10	1079.91	706.723		53.223	44.05	113.735	111.148		0.962181
chr1	23130377	23130464	NM_200059	6	+		141.83	103.034	1509.36	1831.22		76.064	67.26	1108.29	573.106		0.823457
chr1	23413902	23414076	NM_001013446	13	-		4.96571	8.95429	6.50857	1.70286		113.985	113.679	24.785	24.957		0.540635
chr1	23414222	23415557	NM_200771	1	+		160.82	374.696	53.8031	62.2889		113.985	113.679	24.785	24.957		0.80948
chr1	24343736	24343844	NM_213368	8	-		66.4037	26.5413	23.1927	20.7339		66.085	32.209	48.816	37.178		0.862116
chr1	24945331	24945386	NM_212988	11	-		79.4107	178.839	139.554	194.929		79.391	166.728	300.568	232.073		0.543532
chr1	24993611	24993680	NM_200554	8	+		15.6714	2.78571	34.7143	10.0286		35.482	21.788	56.868	27.916		0.998541
chr1	24981861	24982099	NM_200808	4	+		214.188	36.4895	128.678	310.803		6.209	4.263	10.568	18.396		0.796685
chr1	25326148	25326598	NM_001002161	6	-		6.39024	4.04435	0.505543	0.505543		9.979	15.157	11.701	13.508		-0.322398
chr1	25630703	25630924	NM_212603	7	-		524.185	154.072	402.685	180.216		1111.02	2137.39	1454.4	711.012		-0.251646
chr1	25748435	25748582	NM_201116	9	-		9.93919	6.91216	2.89189	2.60811		26.833	13.499	5.284	3.988		0.982816
chr1	26774853	26775334	NM_001045258	9	+		13.8651	10.0768	35.2718	8.25519		73.625	60.865	284.59	106.903		0.946026
chr1	27013587	27013785	NM_001003779	6	+		7.25126	0.753769	7.36683	2.07538		7.762	4.973	23.527	15.952		0.446085
chr1	27820018	27820111	NM_001037434	10	-		4.95745	0.244681	10.9574	6.88298		46.792	53.524	112.226	88.507		0.85423
chr1	27880872	27880976	NM_213047	21	-		29.3619	5.89524	18.4095	2.54286		85.822	121.494	84.798	37.821		0.203307
chr1	27991653	27991895	NM_001007317	3	-		32.9259	6.83951	18.7119	10.0988		692.782	221.199	158.147	169.552		0.859976
chr1	28142181	28145430	NM_200315	2	+		12.6535	13.1366	4.81508	1.25662		10.423	9.947	8.304	3.988		0.917374
chr1	28071680	28071950	NM_200980	6	+		38.6568	8.64576	25.4649	26.0775		4.435	5.921	24.785	16.852		0.0237335
chr1	28704095	28704187	NM_001161351	5	-		1.26882	1.44086	0.903226	0.430108		63.646	20.131	11.575	7.976		0.556492
chr1	28743382	28743674	NM_212728	17	+		25.0273	6.39932	48.6894	31.4369		47.235	60.629	72.72	83.618		0.452367
chr1	28711954	28712093	NM_200522	21	+		124.371	66.5857	28.4714	29.1714		50.34	85.259	80.395	37.435		-0.137558
chr1	29779717	29779798	NM_001007450	12	+		6.29268	7.37805	1.46341	0.829268		272.988	190.175	20.382	15.952		0.91854
chr1	31111851	31111874	NM_213243	9	+		20.4167	6.70833	1.5	3.16667		107.998	50.918	64.165	20.583		0.824325
chr1	31128350	31128535	NM_001020631	4	+		2.19892	0.817204	7.58602	4.17742		6.209	3.079	33.215	28.945		0.920509
chr1	31111542	31111826	NM_001045377	6	-		3.77895	5.76491	4.33684	3.50175		107.998	50.918	64.165	20.583		-0.0625193
chr1	31882840	31882923	NM_001020615	4	+		5.33333	1.7619	4.90476	1.33333		5.988	4.026	6.291	5.146		0.82971
chr1	33191242	33191411	NM_212904	6	+		124.706	131.259	10.3294	5.87647		122.856	144.466	82.156	80.788		0.969825
chr1	33279700	33279791	NM_180965	2	-		2933.79	81.6196	2.59783	1.91304		816.525	107.521	45.922	22.255		0.99755
chr1	33190416	33190524	NM_200909	8	-		19.5229	21.2569	32.9358	70.6606		122.856	144.466	82.156	80.788		-0.734201
chr1	33300938	33301527	NM_173272	10	+		4.98644	4.52373	8.63559	2.41695		2.439	6.394	14.72	3.731		0.864041
chr1	33836605	33836626	NM_001008733	8	+		5.54545	0.954545	5.77273	1.09091		43.022	26.525	32.082	14.923		0.808425
chr1	34328021	34328234	NM_001103133	8	+		91.4346	242.43	69.8925	64.9953		86.265	83.838	206.711	84.004		-0.381313
chr1	34328021	34328234	NM_001002127	9	+		91.4346	242.43	69.8925	64.9953		86.265	83.838	206.711	84.004		-0.381313
chr1	34318169	34318305	NM_001003473	8	+		5.55474	17.8978	12.1825	0.277372		75.177	58.26	30.195	9.391		0.411614
chr1	35664549	35664730	NM_001105112	7	+		17.7802	8.92308	3.02198	3.14835		4.657	7.579	7.549	4.631		-0.365539
chr1	35902843	35902937	NM_001002077	4	+		14.2105	19.5474	29.0842	28.8737		17.519	4.263	25.792	19.425		0.539226
chr1	38580963	38580993	NM_001037424	5	-		640.516	870.613	229.194	259.839		1577.83	2677.84	3396.59	1372.49		-0.0402743
chr1	38552283	38552549	NM_001020641	12	+		25.7715	35.4457	14.4419	8.49813		43.687	25.814	45.293	15.823		0.158537
chr1	38770648	38770826	NM_001040307	6	-		80.9553	18	5.59777	0.932961		35.26	17.289	9.31	13.765		0.976145
chr1	38771713	38771816	NM_001076736	11	+		0.432692	0.990385	3.97115	2.83654		35.26	17.289	9.31	13.765		-0.844313
chr1	39172749	39172981	NM_212948	5	+		61.0215	30.7854	86.0129	89.3991		56.106	13.499	44.79	37.178		0.606068
chr1	40221840	40221985	NM_001017639	6	-		31.5411	21.2055	31.6986	22.1164		35.482	42.629	36.36	20.197		0.210979
chr1	40228280	40228415	NM_207054	5	+		45.0956	38.6397	49.4559	7.36029		81.386	138.072	48.941	20.84		0.492272
chr1	40258248	40258303	NM_200369	8	-		37.6071	153.786	67.9821	51.875		38.586	143.993	125.562	106.774		0.748074
chr1	40408061	40408269	NM_001009898	5	-		258.139	164.249	116.12	80.9569		51.892	74.365	32.711	37.692		0.465673
chr1	40426578	40426745	NM_001002710	13	+		5.66071	0.875	1	0.452381		63.424	8.763	8.681	4.117		0.999625
chr1	40656213	40656332	NM_200023	5	+		46.4167	44.8667	698.525	360.242		239.724	127.178	271.128	241.078		0.680173
chr1	41000734	41000841	NM_001077541	15	-		16.6944	1.37963	7.22222	9.87037		13.749	13.499	22.395	28.687		0.0314204
chr1	41512497	41512768	NM_201306	9	+		16.7096	20.2059	18.4228	1.90074		122.634	54.708	72.217	20.454		0.61555
chr1	41846742	41846841	NM_200766	4	+		146.63	1532.13	236.74	307.16		518.478	655.783	431.288	346.565		0.789462
chr1	41992206	41992593	NM_001080190	4	+		21.4201	6.68041	13.8892	12.6727		22.176	10.184	10.191	14.665		0.861845
chr1	44068806	44068997	NM_200383	3	+		69.974	64.6562	13.0833	7.91667		116.646	129.072	33.592	16.852		0.986422
chr1	44845949	44846183	NM_001002678	2	+		180.46	64.3957	131.447	83.183		981.516	531.921	765.701	389.017		0.930096
chr1	45037148	45037415	NM_001002113	9	-		59.6679	21.4216	48.2276	19.056		43.022	21.552	36.36	18.139		0.997579
chr1	45037846	45038148	NM_001003416	6	+		84.1089	4.42904	7.11221	8.44224		43.022	21.552	36.36	18.139		0.744861
chr1	45269841	45269869	NM_213139	7	+		20.5862	5.31034	13.7586	36.0345		50.783	41.682	51.332	89.278		0.945244
chr1	45294183	45294431	NM_001081692	22	+		14.1807	13.0241	16.1767	21.4137		20.624	41.208	69.449	51.457		0.415719
chr1	45405454	45405772	NM_001077785	5	+		12.2288	4.46082	9.22884	13.0251		52.557	44.287	26.924	27.401		-0.176348
chr1	45505009	45505039	NM_001003728	6	-		93.9677	32.7097	1964.1	2662.48		58.545	50.445	317.931	666.115		0.956351
chr1	45670687	45670713	NM_199721	11	-		727.519	119.926	248.296	334.481		83.604	129.546	86.056	108.189		-0.694934
chr1	45812397	45812486	NM_001006078	10	-		11.3111	0.922222	2.54444	1.4		137.936	39.787	10.946	17.11		0.94323
chr1	46142379	46142626	NM_213380	7	+		26.2984	5.21371	4.58468	0.745968		66.307	61.576	30.321	23.67		0.729525
chr1	46310640	46310764	NM_001190306	12	+		25.472	270.56	1.496	4.272		22.176	35.051	28.56	33.061		0.565808
chr1	46429126	46429404	NM_001008624	21	+		14.6559	1.26165	0.544803	2.66308		36.812	2.368	12.078	15.952		0.934511
chr1	47160885	47161104	NM_001005397	4	-		1.82273	0.140909	0.195455	4.20455		13.971	4.026	2.013	4.503		0.208037
chr1	47147046	47147148	NM_199991	12	-		40.4369	0.728155	1.47573	0.970874		31.712	7.342	5.787	5.789		0.997533
chr1	47095976	47096185	NM_001007327	9	+		169.776	84.5619	27.5238	44.481		17.076	101.6	47.054	62.778		-0.457377
chr1	47215206	47215434	NM_214776	5	-		1.13974	0.934498	21.0568	13.5895		7.983	13.736	61.145	45.411		0.993288
chr1	47372383	47372568	NM_213425	10	-		6.37634	18.2742	37.2043	25.2419		2.218	25.814	59.887	39.365		0.999237
chr1	47619113	47619248	NM_001045563	5	-		3.52206	1.77941	0.838235	2.79412		32.821	27.709	7.675	5.017		0.442572
chr1	47619113	47619221	NM_001089550	7	-		4.14679	2.22018	1.04587	3.48624		32.821	27.709	7.675	5.017		0.408722
chr1	47618313	47618581	NM_194425	2	-		25.6729	18.4424	8.65428	4.13011		32.821	27.709	7.675	5.017		0.980115
chr1	47611038	47611357	NM_001045562	10	-		38.4281	7.34687	4.96875	1.14062		28.385	5.21	6.542	6.689		0.979574
chr1	47588628	47588994	NM_001002633	12	+		1.25068	0.223433	5.37875	3.24251		4.213	3.079	3.774	5.789		0.316653
chr1	47997019	47997296	NM_200389	9	+		18.3669	9.38849	5.97122	5.3741		41.469	19.42	13.839	8.105		0.992618
chr1	49859333	49859757	NM_131260	2	+		12.5247	1.16471	96.5765	56.9129		29.716	7.105	317.679	165.95		0.996955
chr1	49941436	49941527	NM_001089368	36	+		21.913	8.1413	39.75	13.0109		35.925	100.179	98.889	54.416		0.185276
chr1	49941206	49941290	NM_001200033	4	-		0.764706	1.37647	15.8941	21.9059		35.925	100.179	98.889	54.416		0.0383462
chr1	50425805	50425950	NM_001003515	8	-		4.88356	5.5411	18.7329	12.9452		28.607	14.92	22.772	48.756		0.242033
chr1	50801061	50801170	NM_001045851	7	+		4	3.71818	10.4727	11.4636		38.586	35.288	69.575	112.563		0.9158
chr1	51034850	51035047	NM_001128699	12	-		24.9545	23.4798	11.1768	12.2121		33.708	35.525	20.633	23.542		0.977767
chr1	51486419	51486461	NM_199947	9	+		70.2791	2.4186	54.2558	81.7674		399.392	494.975	236.278	581.596		0.0190333
chr1	51547734	51548119	NM_212915	18	-		103.902	8.07772	7.60104	13.6736		67.194	79.812	114.616	112.177		-0.724774
chr1	51571592	51571697	NM_131514	11	-		9.04717	9	7.67925	17.4811		23.063	20.367	32.837	50.814		0.858866
chr1	51916359	51916447	NM_213499	9	+		9.64045	23.5056	29.0225	10.4719		100.901	83.838	92.599	96.997		-0.714868
chr1	52100016	52100204	NM_001004553	6	-		38.9524	58.3069	62.7619	158.741		15.302	21.078	46.677	54.802		0.796622
chr1	52046089	52046305	NM_001111157	6	+		30.2673	37.1336	16.447	20.1014		126.404	19.42	21.137	12.221		0.312748
chr1	52214368	52214579	NM_200226	9	-		8.87736	3.43396	5.03774	6.5283		58.767	56.602	49.319	61.492		0.436699
chr1	52215802	52215894	NM_001002468	6	+		30.9677	16.8065	27.3656	59.0108		132.392	94.732	44.035	108.704		0.283454
chr1	52625138	52625564	NM_201021	3	+		22.7541	29.2131	6.7096	9.48478		51.227	54.945	21.892	25.986		0.987326
chr1	52623110	52623351	NM_001003739	10	-		10.405	17.2397	36.5372	22.5372		5.988	10.657	53.974	37.95		0.950581
chr1	52632453	52632738	NM_001002298	7	+		63.6259	85.6503	22.7413	14.507		44.352	63.234	37.87	42.195		0.847025
chr1	52999710	52999942	NM_001145361	7	-		29.691	6.48498	1.76395	2.27468		21.733	10.894	1.51	2.83		0.954738
chr1	53154054	53154211	NM_214729	8	-		0.35443	8.10127	22.4241	9.43671		21.511	5.921	53.848	20.583		0.775509
chr1	53286317	53286415	NM_001083028	18	-		47.0303	42	6.56566	12.6263		41.469	79.101	43.406	55.317		0.304653
chr1	53288210	53288390	NM_001081629	24	+		358.624	85.674	132.978	136.099		371.45	321.142	177.271	261.017		0.591274
chr1	53775551	53776167	NM_001145572	7	+		2.03728	2.19611	0.73906	0.841167		6.875	5.21	8.304	3.216		-0.0034043
chr1	54058909	54059105	NM_001045265	6	-		43.6142	10.9492	29.2538	38.7563		12.64	2.368	25.792	18.653		0.542793
chr1	54275482	54275677	NM_001111189	18	+		7.22959	10.25	11.3469	9.83673		148.802	105.863	255.024	286.103		0.395516
chr1	54485413	54485532	NM_199852	7	-		15.9	32.2583	15.6667	14.4333		89.37	37.656	32.586	44.768		-0.311537
chr1	54485863	54486135	NM_213531	26	+		13.4249	2.80586	17.1465	39.1905		89.37	37.656	32.586	44.768		-0.0747769
chr1	54447247	54447381	NM_001002316	11	-		4.56296	26.237	15.5704	5.62963		40.361	31.262	42.147	17.367		0.155869
chr1	55245408	55245449	NM_001145567	8	-		1.16667	1.47619	11.7857	12.4762		70.077	115.336	133.991	117.966		0.701947
chr1	55257962	55258229	NM_201300	6	-		147.429	37.347	5.98134	36.5896		45.905	40.972	4.152	14.279		0.756237
chr1	55276815	55277214	NM_213358	11	+		107.165	46.2725	9.795	26.59		38.586	58.26	9.436	20.712		0.531322
chr1	55511430	55511646	NM_001089428	19	-		521.825	75.4931	41.7465	43.977		36.812	93.785	46.048	64.579		-0.573449
chr1	55548147	55548258	NM_001040044	3	-		82.4821	64.0089	92.9911	63.1518		21.067	24.157	29.44	14.537		0.700097
chr1	55634641	55634784	NM_001145561	10	+		8.47222	1.39583	4.79861	1.68056		35.482	21.315	29.692	29.073		0.856911
chr1	55749812	55750050	NM_001111238	6	-		37.8745	8.86611	20.3096	29.1464		5.766	19.183	55.232	62.263		-0.0986879
chr1	55721844	55722416	NM_001089547	15	-		87.5079	38.7417	79.8447	46.8115		61.428	112.968	64.542	38.336		-0.367393
chr1	55787176	55788299	NM_131878	1	-		64.4564	20.6219	4.80605	3.50356		40.139	14.92	1.384	1.544		0.996611
chr1	56289472	56289800	NM_199773	3	-		314.307	370	62.2462	24.8754		162.995	359.745	41.518	17.238		0.917685
chr1	56325250	56325490	NM_200848	3	-		9.22407	20.332	97.1203	199.622		17.963	4.026	24.408	25.085		0.69664
chr1	56292445	56292520	NM_201299	13	+		6.10526	1.42105	3.26316	5		20.18	12.789	9.688	33.061		0.61608
chr1	56450299	56450796	NM_214757	4	+		122.536	3.48594	29.6486	33.3835		141.927	6.631	50.451	74.742		0.961825
chr1	56727250	56727342	NM_001045323	2	+		10.4516	5.45161	4.11828	3.13978		69.633	54.234	18.998	7.719		0.895296
chr1	56981132	56981474	NM_201172	9	-		176.767	44.5627	21.93	26.8601		146.806	83.838	42.399	52.615		0.968496
chr1	59676838	59677129	NM_001080640	5	-		50.0651	21.089	45.2055	50.339		29.494	49.498	54.351	77.572		0.112164
chr1	59722537	59722840	NM_213242	19	-		30.9309	2.94737	7.65789	14.227		19.293	35.288	25.414	35.12		-0.729976
chr1	59961949	59962020	NM_001037694	7	-		314.292	53.0417	20.1667	35.2361		145.475	197.516	64.668	72.169		0.352032
chr1	60036407	60036647	NM_205657	5	+		6.60996	38.1909	90.5477	122.954		87.374	49.971	85.176	101.757		0.514777
chr1	60320208	60320275	NM_213219	11	+		41.1471	19.4706	57.25	23.5735		52.114	166.492	164.564	110.891		-0.0172855
chr1	60313812	60313879	NM_200484	10	+		59.6765	3.05882	0.558824	5.45588		43.243	19.42	19.249	24.442		0.987893
chr2	3055155	3055307	NM_001113597	16	+		7.77124	8.84967	18.1765	22.0261		52.557	38.13	33.844	55.831		0.126694
chr2	10494844	10494926	NM_199756	8	-		98.253	297	1648.54	4830.43		31.047	37.893	693.358	721.56		0.820914
chr2	20971071	20971346	NM_001077535	13	+		357.011	73.5145	76.9239	17.279		248.151	249.145	57.119	26.372		0.645091
chr2	35601432	35602171	NM_173277	28	+		29.8284	16.4905	50.8649	48.8797		26.168	61.102	116.755	96.354		0.748842
chr2	115937	116012	NM_205606	8	+		56.8947	30.0789	34.5263	34.5526		49.453	58.023	30.195	35.634		0.154787
chr2	1897279	1897513	NM_001113336	10	-		8.76596	3.87234	5.90213	4.22128		2.218	5.921	12.707	14.665		-0.585639
chr2	1713321	1713543	NM_200739	4	-		10.4619	105.462	119.717	116.91		257.908	114.152	43.406	50.685		-0.978559
chr2	1308282	1308441	NM_001002317	4	+		292.2	114.575	156.963	234.956		95.136	55.418	111.093	80.402		0.387045
chr2	4310670	4310777	NM_001243875	25	+		33.0278	7.62037	12.6852	12.1389		28.164	2.842	107.822	18.525		-0.0195241
chr2	6951561	6951611	NM_001077329	3	-		40.0784	31.7451	13.5686	20.5294		7.983	29.13	20.508	59.433		-0.461427
chr2	8501544	8501729	NM_213227	24	+		10.371	5.78495	6.46237	4.81183		68.081	25.578	29.44	25.857		0.975373
chr2	9544392	9544484	NM_001017634	9	+		68.8602	86.3226	10.129	25.0753		26.39	33.63	12.833	11.449		0.972291
chr2	9704505	9704711	NM_001076707	10	-		16.1643	6.17874	4.56522	2.65217		60.763	50.918	51.961	46.826		0.969957
chr2	10818458	10818544	NM_001130643	18	-		76.5057	16.5402	17.9425	16.0115		5.988	9.947	18.369	17.881		-0.767602
chr2	10612458	10612676	NM_001007415	19	+		0.694064	1.0411	0.694064	1.38813		57.88	36.235	35.731	17.881		-0.825282
chr2	13740481	13740582	NM_201064	10	+		51.2843	7.79412	9.80392	13.3039		90.479	63.944	39.631	16.852		0.723742
chr2	14945875	14945982	NM_001130620	23	-		3.05556	9.19444	2.03704	1.96296		17.519	11.368	15.978	13.508		-0.711969
chr2	16472898	16473441	NM_001077803	16	+		10.0202	3.77206	13.5607	6.96875		17.297	2.842	8.681	11.192		0.484229
chr2	15981492	15981628	NM_001193469	10	+		0.832117	0.518248	2.63504	2.74453		8.87	8.289	23.024	40.008		0.899268
chr2	16663065	16663153	NM_001001951	11	-		7.25843	20.4494	22.2921	25.1685		65.641	45.235	43.028	22.513		-0.924945
chr2	21234815	21235015	NM_200068	15	-		415.269	116.617	3.89055	7.21891		448.845	615.285	50.954	42.71		0.606182
chr2	21644177	21644308	NM_201454	8	-		92.0152	57.2121	153.932	82.9015		154.789	80.285	127.197	98.026		0.524659
chr2	22538891	22539316	NM_001044972	10	+		105.784	6.5892	5.29812	5.27934		63.202	7.815	6.542	5.274		0.999647
chr2	24250815	24251001	NM_001002148	8	-		18.5722	2.06417	16.5829	10.9037		44.796	20.841	48.816	20.068		0.838948
chr2	25806281	25806619	NM_199703	31	+		43.3599	22.1268	7.43363	13.6136		42.8	22.973	19.627	28.687		0.8985
chr2	26738591	26738702	NM_199943	18	-		54.3839	7.1875	31.4554	8.33929		182.953	211.726	52.967	40.909		0.186535
chr2	27639270	27639769	NM_001144819	14	+		16.014	8.476	30.746	32.654		11.532	37.656	34.221	63.164		0.537609
chr2	27478630	27479079	NM_001110476	11	+		13.5422	1.36444	5.49556	5.35778		123.299	24.867	16.104	13.508		0.889599
chr2	29638053	29638186	NM_001005929	21	-		60.2015	42.6194	31.5522	11.3881		31.712	33.867	23.905	20.969		0.848595
chr2	31024268	31024632	NM_001013270	12	+		32.0575	41.7479	52.3123	20.2658		39.252	88.101	78.13	51.972		0.70544
chr2	31675489	31675851	NM_194370	12	+		7.86501	1.42975	5.33609	17.8512		10.423	5.21	44.035	56.989		0.741638
chr2	32389563	32389641	NM_001105588	12	-		7.50633	5.65823	1.50633	7.34177		91.366	141.388	193.249	243.908		-0.215945
chr2	37122078	37122411	NM_131855	18	-		53.4311	101.65	14.8443	26.6078		137.714	215.042	37.996	45.025		0.983946
chr2	38015015	38015220	NM_001076650	8	-		16.5437	31.2816	8.48544	13.4854		26.168	7.579	12.959	20.068		-0.479327
chr2	39462852	39463255	NM_001002667	7	-		4.49505	0.455446	2.56931	7.44802		10.423	6.394	18.243	30.488		0.829435
chr2	41544817	41544888	NM_001080597	10	+		3.56944	1.83333	2.93056	0.930556		23.285	5.447	13.965	12.478		0.69369
chr2	42210624	42210693	NM_207086	14	-		11.4429	1.08571	3.27143	3.6		20.402	26.999	9.813	8.105		0.0595484
chr2	42476262	42476351	NM_199851	16	-		0.755556	17.2111	13.3222	10.0667		76.508	33.156	116.252	222.424		-0.128324
chr2	43306138	43306432	NM_205735	22	+		72.9525	26.739	16.6441	6.18983		60.319	102.784	165.822	82.203		-0.541987
chr2	44838979	44839074	NM_001162502	32	-		61.5312	1.19792	15.6562	6.14583		544.646	569.814	111.219	134.046		0.385813
chr2	47743431	47743534	NM_001004635	5	-		63.7788	22.2788	7.33654	3.59615		219.766	183.307	25.918	23.027		0.867753
chr2	48369949	48369972	NM_001030161	30	-		3.83333	5.66667	8.54167	2.875		174.304	192.543	193.124	144.338		0.822535
chr2	50028024	50028091	NM_001105606	10	+		60.5441	39.2941	16.8971	5.52941		81.165	30.551	40.512	17.495		0.848252
chr2	50027906	50028091	NM_200301	10	+		39.5538	28.8656	9.36559	3.80645		81.165	30.551	40.512	17.495		0.781983
chr2	53083788	53084317	NM_130911	7	-		10.2547	30.6208	12.1226	11.7698		10.201	13.262	57.245	64.836		-0.468469
chr2	53554286	53554445	NM_001002071	8	+		7.95625	9.13125	11.4625	4.05625		80.056	43.34	27.805	26.501		0.044692
chr2	54307208	54307340	NM_200866	16	+		56.3383	18.015	31.8872	55.8496		82.717	104.916	88.069	83.104		-0.91517
chr2	55462717	55462778	NM_131797	7	-		5.87097	4.17742	0.983871	15.3387		24.172	17.289	4.529	8.748		-0.0498173
chr2	55283370	55283520	NM_200150	9	+		40.9934	4.23179	3.27815	1.46358		17.519	9	22.521	12.35		0.240078
chr2	55993478	55993632	NM_001089562	9	-		16.8129	36.071	10.0452	1.35484		116.203	151.335	66.933	14.665		0.946377
chr2	56353058	56353206	NM_001020526	5	+		1.79195	2.28859	2.19463	0.302013		70.964	43.577	49.067	12.092		0.735236
chr2	56911994	56912362	NM_001045453	8	-		31.523	3.74797	3.27642	0.205962		8.205	41.682	16.482	10.677		-0.408594
chr2	116708	116917	NM_205606	1	+		62.6381	22.8714	34.5238	20.8429		49.453	58.023	30.195	35.634		0.144675
chr2	164918	164959	NM_194390	2	-		0.97619	363.429	70.0238	79.1429		14.858	140.203	93.983	51.972		0.884416
chr2	334713	335089	NM_001030240	2	+		8.07427	2.3634	7.34218	4.30769		73.403	10.421	49.193	15.823		0.95041
chr2	1082568	1082728	NM_001017742	7	-		16.3292	1.55901	2.81988	4.2795		2.218	3.316	4.655	9.262		-0.432126
chr2	1439379	1439435	NM_001034976	10	-		68.6842	15.2632	2.31579	5.61404		27.277	34.34	12.078	12.221		0.502653
chr2	1970654	1970756	NM_200100	4	+		52.9515	11.835	6.65049	3.97087		8.87	6.631	11.197	14.279		-0.413219
chr2	2384413	2384584	NM_199744	10	-		21.9302	10.2558	20.6105	13.9128		87.152	108.231	85.805	70.111		-0.359924
chr2	2964165	2964335	NM_199973	16	-		13.6959	92.1228	45.5497	87.7251		86.265	74.838	127.575	90.436		-0.32978
chr2	2923615	2923699	NM_201324	21	+		123.835	19.0706	14.2706	11.8235		158.116	167.202	120.403	89.021		0.500678
chr2	3444089	3444471	NM_200402	8	+		84.9243	52.0366	21.3943	7.18538		38.586	42.629	22.017	7.204		0.858923
chr2	3444845	3444959	NM_001002126	8	-		0.66087	16.4	14.2261	4.24348		8.205	43.577	77.501	17.624		0.835393
chr2	3476041	3476125	NM_201452	5	-		172.482	125.341	31.0353	18.7529		312.018	389.823	230.993	178.3		0.804218
chr2	3546015	3546385	NM_213038	7	+		32.2722	5.73854	17.1321	12.4447		2.661	17.289	51.458	36.02		-0.41631
chr2	3897045	3897192	NM_001045437	6	-		4.33108	15.4054	6.60135	4.28378		11.088	15.631	8.807	11.835		0.781292
chr2	3897558	3898156	NM_001076628	6	+		3.65776	3.70952	2.47579	1.66444		11.088	15.631	8.807	11.835		0.4506
chr2	3913779	3914202	NM_001076635	3	-		3.89387	13.0495	9.16981	13.4906		142.593	42.393	32.334	35.377		-0.873949
chr2	3996682	3996860	NM_001002573	3	+		38.6369	30.6201	151.508	140.916		84.269	9	34.221	36.663		-0.157572
chr2	4429931	4429954	NM_199681	11	-		22.625	14.1667	7.45833	17.9583		209.121	87.627	126.442	219.723		0.69976
chr2	5085587	5086071	NM_001194928	22	-		3.72165	38.5794	44.734	52.2021		48.566	54.471	81.15	65.094		0.68792
chr2	5048627	5050274	NM_001163995	1	+		43.4078	25.4727	22.4302	15.1911		180.292	181.175	62.403	95.968		0.673059
chr2	5085587	5086071	NM_001024221	6	-		3.72165	38.5794	44.734	52.2021		48.566	54.471	81.15	65.094		0.68792
chr2	5365865	5366141	NM_213462	10	-		55.231	78.5812	12.6137	5.62816		41.913	56.366	30.824	9.005		0.927049
chr2	5694172	5694211	NM_001128685	8	-		5.975	4	3.25	6.75		7.762	4.026	38.751	18.911		-0.400447
chr2	5707603	5707751	NM_199764	7	-		131.799	45.8993	46.5302	97.6577		55.44	49.498	45.544	59.305		0.789321
chr2	5709760	5709788	NM_201508	12	+		3.24138	0.965517	1.31034	0.965517		43.243	34.814	35.354	41.809		0.626062
chr2	5885600	5885778	NM_214721	3	+		484.86	154.531	222.559	142.341		663.066	726.358	766.078	576.322		0.0096812
chr2	5934056	5934843	NM_001077600	4	-		113.331	76.5317	44.3135	84.7195		5.988	15.631	12.204	2.316		-0.526859
chr2	6704192	6704554	NM_001126390	15	+		74.3333	92.8209	19.5069	31.0468		39.474	74.838	71.085	21.741		0.250523
chr2	6837115	6837213	NM_001017779	8	+		10.2626	3.0404	2.61616	4.85859		75.842	24.867	7.297	8.49		0.911339
chr2	6836476	6836520	NM_001076561	5	-		21.8889	2.77778	0.622222	2.2		75.842	24.867	7.297	8.49		0.981368
chr2	7264821	7265251	NM_194411	11	+		6.25058	9.43387	1.62645	2.81903		28.607	14.683	2.642	3.345		0.644236
chr2	7495786	7495840	NM_199772	8	-		34.4909	1.61818	1.2	0.6		157.672	23.683	19.753	25.986		0.998516
chr2	7541400	7541614	NM_001100045	2	-		14.4047	9.66047	0.855814	3.03721		55.662	17.999	11.323	8.105		0.878654
chr2	7584793	7585017	NM_200609	14	-		75.8667	4.39556	13.6756	7.45333		248.151	203.2	74.356	99.956		0.66835
chr2	7896789	7898949	NM_001079995	1	+		15.8126	36.5419	38.8482	46.2494		48.122	27.946	13.462	18.525		-0.920902
chr2	8045581	8045713	NM_001007436	4	+		2.49624	7.1203	4.93233	6.58647		51.449	23.683	49.193	55.96		-0.489012
chr2	8473016	8473078	NM_001006090	16	-		3.93651	0.634921	5.68254	0.603175		4.435	6.394	15.223	9.391		0.49107
chr2	8433647	8433789	NM_213144	19	+		186.238	105.322	133.741	108.762		90.257	234.462	262.447	205.829		-0.812725
chr2	9414613	9415099	NM_200930	7	-		73.8172	9.62628	8.08008	3.70021		131.283	43.34	25.666	15.437		0.988103
chr2	9532451	9532957	NM_131757	15	-		98.9329	60.4043	39.5621	36.8402		45.239	46.892	40.889	36.02		0.693353
chr2	9485032	9485220	NM_178290	6	-		62.9206	21.0529	37.7884	29.4021		102.01	60.392	32.208	41.552		0.716646
chr2	9607434	9607449	NM_212577	11	-		10.125	15.1875	121.625	220.75		102.454	84.312	232.503	250.597		0.940517
chr2	9762583	9762844	NM_213384	5	+		10.2557	27.7023	14.8015	13.8092		15.967	7.815	10.568	7.075		-0.596632
chr2	9778610	9778816	NM_200267	6	-		42.1401	207.348	63.9034	43.2464		91.144	54.708	65.423	28.302		-0.124397
chr2	9735017	9735243	NM_001100090	4	+		0.334802	2.5022	8.10132	8.90308		5.766	3.079	10.443	7.847		0.749909
chr2	9760468	9760548	NM_213064	6	-		77.716	19.6296	26.4815	49.5432		137.27	72.707	49.193	47.341		0.742614
chr2	9949406	9949513	NM_001008649	6	+		19.6296	6.76852	4.30556	8.37037		43.022	12.078	9.813	10.549		0.973709
chr2	9936000	9936294	NM_201466	3	+		53.861	72.1864	297.027	180.339		121.969	140.677	185.826	205.958		0.788305
chr2	9852661	9852954	NM_213109	6	+		30.3129	29.7143	60.5748	73.3469		106.889	42.156	56.868	69.467		-0.175123
chr2	10177810	10178038	NM_213146	12	-		130.262	49.5284	125.467	145.655		27.498	67.023	129.21	99.956		0.209706
chr2	10423509	10423692	NM_001045264	15	-		37.8913	74.5435	28.0489	45.3696		94.47	44.998	50.577	49.785		-0.382847
chr2	10433431	10433736	NM_001040354	5	+		31.1634	4.35621	0.879085	4.65359		32.599	11.368	1.887	3.345		0.968712
chr2	10668764	10668929	NM_001007409	11	-		57.3494	9.20482	9.1988	10.253		70.298	79.812	13.21	17.881		0.473144
chr2	10705343	10705833	NM_001082855	7	+		1.77393	9.37882	61.389	73.6293		19.737	9	36.486	33.061		0.874186
chr2	10910593	10910704	NM_001099976	9	-		3.83929	2.47321	1.20536	0.875		40.582	19.657	14.217	5.66		0.970474
chr2	10910691	10910976	NM_001002611	6	+		11.3881	29.8531	14.8986	6.71678		40.582	19.657	14.217	5.66		0.0893306
chr2	11295317	11295567	NM_212878	7	-		20.9482	22.8685	26.4821	36.4143		34.373	17.289	49.696	40.78		0.44017
chr2	11439358	11440025	NM_001037568	6	-		8.15719	40.9341	48.2605	29.0644		50.783	22.025	117.887	109.733		0.287379
chr2	11714919	11715243	NM_001037397	9	+		0.581538	0.449231	2.80923	0.732308		37.034	13.499	17.74	15.051		-0.185123
chr2	11737851	11737990	NM_200348	16	+		25.4714	32.6143	33.8429	16.3643		141.484	182.359	123.046	54.03		0.804137
chr2	12087462	12087538	NM_199518	10	-		205.779	28.5065	43.0519	20.7792		68.524	93.311	65.046	29.974		0.151269
chr2	13060325	13060543	NM_200906	13	-		17.8219	1.88128	6.16438	6.31963		91.587	71.523	47.809	37.564		0.602226
chr2	13060325	13060553	NM_001100962	12	-		17.2096	1.79913	5.8952	6.04367		91.587	71.523	47.809	37.564		0.605178
chr2	13046370	13046785	NM_201139	10	-		13.2837	7.80769	9.8726	4.94712		64.089	44.998	49.445	32.547		0.994733
chr2	13526921	13527057	NM_001003840	9	+		32.5839	8.14599	106.854	3.78832		353.488	314.984	325.228	45.54		0.470313
chr2	14869003	14869302	NM_001024073	7	+		233.427	81.77	31.4333	31.02		527.57	510.606	213.254	124.527		0.772207
chr2	14949000	14949101	NM_200111	27	+		1.07843	0.519608	3.53922	0.745098		11.975	9.236	41.77	25.986		0.862767
chr2	16417593	16417771	NM_201033	42	+		65.5866	2.58659	6.05587	1.70391		70.077	84.312	1.636	39.108		0.346586
chr2	16574764	16574920	NM_001080200	32	-		43.5159	27.1975	121.713	113.752		129.065	171.702	593.965	520.877		0.975906
chr2	16517118	16517166	NM_001037386	10	+		67.3878	14.2449	17.8571	10.449		236.841	302.432	150.976	95.968		0.321432
chr2	16936082	16936148	NM_198807	13	-		79.2537	1.43284	0.58209	0.731343		234.624	77.917	14.217	15.437		0.960654
chr2	18292721	18292829	NM_001100007	15	-		2.58716	0.633028	13.8807	4.37615		3.326	26.525	68.317	62.135		0.71228
chr2	19218054	19218194	NM_213080	11	+		189.34	40.7589	16.3475	6.75177		475.678	400.717	88.321	81.946		0.799447
chr2	19463877	19463959	NM_181559	7	-		61.3976	27.4337	28.8675	38.0964		99.793	71.523	218.664	179.2		-0.292329
chr2	20763778	20763930	NM_194378	6	+		29.3791	27.3922	93.3529	58.3333		19.515	52.576	144.308	143.952		0.861737
chr2	20859745	20859865	NM_212995	17	+		7.4876	29.1736	9.15702	2.28099		96.91	88.575	48.816	16.466		0.590007
chr2	21152499	21152896	NM_001076615	7	+		311.666	32.5729	61.8945	118.211		43.022	34.34	46.299	136.876		-0.0320161
chr2	21249344	21249451	NM_001111197	17	+		3.96296	0.00925926	9.09259	1.72222		49.231	11.605	48.69	31.26		0.813012
chr2	22098103	22098441	NM_201185	4	+		222.758	8.9823	2.10029	1.10619		192.932	42.866	2.516	1.544		0.983476
chr2	22093973	22094304	NM_213308	11	-		26.4157	50.7229	36.1295	41.5693		51.892	27.235	7.297	12.993		-0.482104
chr2	22116957	22117097	NM_001128736	5	-		28.8511	2.56738	3.0922	4.07092		36.812	5.21	8.178	9.262		0.997169
chr2	22680543	22680721	NM_001144045	20	+		36.2346	20.0726	1.89385	1.89944		30.381	37.656	12.581	6.304		0.803223
chr2	22849554	22849650	NM_201483	15	-		80.1959	19.7526	45.2474	25.3196		1097.05	1095.1	232.755	375.896		0.271633
chr2	22809097	22809139	NM_131213	7	+		37.814	28.6744	9.16279	9.13953		313.349	203.437	99.644	102.915		0.980504
chr2	23053275	23053331	NM_199697	7	+		42.4561	11.7544	11.0877	12.4737		84.935	109.179	56.868	45.797		0.243988
chr2	23135606	23135961	NM_200272	3	-		27.7725	5.24157	0.570225	0.345506		55.884	20.604	1.258	1.672		0.982711
chr2	23182114	23182206	NM_178294	5	+		30.5054	3.87097	17.5054	7.08602		113.985	156.782	128.33	100.213		-0.367125
chr2	23181170	23181556	NM_001080670	7	-		44.6925	78.7494	16.0698	19.5426		113.985	156.782	128.33	100.213		0.764631
chr2	23298623	23298939	NM_213059	4	+		22.3155	40.265	6.60252	20.3407		162.329	39.551	22.646	55.831		0.086371
chr2	23356329	23356549	NM_213034	4	-		175.448	237.683	515.344	1226.75		45.018	70.812	468.529	412.045		0.730941
chr2	23546917	23547058	NM_001029966	9	+		25.4859	7.12676	50.4859	52.3873		17.741	45.945	64.165	55.317		0.545585
chr2	23489730	23489779	NM_205557	5	-		3.34	2.16	15.72	11.82		2.439	12.552	36.612	34.476		0.930761
chr2	23546538	23546681	NM_001199680	2	-		26.3403	18.4444	32.7361	15.3681		17.741	45.945	64.165	55.317		0.0248874
chr2	24055315	24055504	NM_001007411	9	-		38.1895	51.1421	17.7895	6.93158		137.27	122.915	141.414	84.647		0.496861
chr2	24162269	24162487	NM_001098747	18	-		98.6621	26.347	13.8037	12.0868		56.993	105.863	52.338	41.552		-0.0138686
chr2	24532155	24532387	NM_001006057	7	+		93.5021	17.3047	61.7253	23.1674		65.42	35.998	55.484	28.43		0.960945
chr2	24540049	24540587	NM_001002567	5	+		74.4638	51.1892	31.1948	24.436		29.051	12.789	24.785	15.952		0.466964
chr2	24706408	24706476	NM_213510	7	+		152.116	70.6522	1.46377	18.7246		469.469	611.496	15.475	43.096		0.756913
chr2	24889366	24889606	NM_212925	16	-		35.0373	127.838	42.6307	83.6515		102.897	4.973	32.963	44.639		-0.762271
chr2	24894127	24895085	NM_001163298	2	+		5.16684	13.0198	17.7143	18.7487		7.54	80.759	46.803	73.713		0.728392
chr2	25987441	25987627	NM_213262	5	+		329.733	33.3476	356.989	181.85		192.267	223.094	650.078	615.044		0.324932
chr2	26436527	26436553	NM_001020477	16	+		0.962963	1.55556	4.51852	12.5926		5.101	102.784	125.184	118.866		0.555518
chr2	26624207	26624290	NM_213089	12	-		13.2619	14.631	5.72619	2.72619		708.084	138.783	39.505	74.999		0.572296
chr2	26617175	26617236	NM_213112	9	-		4.8871	5.48387	7.08065	2.95161		62.98	39.077	35.354	32.161		0.0332502
chr2	26627845	26628459	NM_001077159	21	+		13.2016	30.2797	18.052	28.1252		37.699	27.235	27.805	32.547		-0.576688
chr2	26646700	26646727	NM_214793	6	+		3.21429	27.5357	121.429	151.214		87.152	224.989	1080.61	1731.67		0.981776
chr2	26624207	26624291	NM_213010	12	-		13.1059	14.4824	5.65882	2.69412		708.084	138.783	39.505	74.999		0.571096
chr2	26768810	26768973	NM_001111188	8	-		15.939	34.3476	4.79878	20.6341		33.264	25.814	45.041	60.076		-0.429199
chr2	26753066	26753579	NM_199747	7	+		39.7529	8.3249	13.9922	10.3113		56.106	6.158	14.217	7.976		0.999681
chr2	27723803	27723869	NM_131347	10	-		18.6119	16.2836	11.0448	31.0896		16.41	16.104	29.44	58.661		0.772439
chr2	27989007	27989075	NM_201330	9	-		2.71014	13.5072	0.434783	6.2029		24.394	17.762	37.87	49.142		-0.461344
chr2	27990114	27990280	NM_001099253	17	+		1.62874	0.814371	2.65868	2.32335		4.435	2.605	4.026	4.245		0.731025
chr2	28143244	28143360	NM_200331	9	-		0.57265	6.05128	3.93162	3.50427		29.051	16.815	10.694	12.993		-0.696186
chr2	29710599	29710877	NM_001039497	6	-		62.8315	7.17921	10.3728	6.93548		158.338	53.76	37.367	22.127		0.976721
chr2	29818199	29818248	NM_001002353	10	+		46.38	4.66	12.86	3.68		107.111	100.653	55.61	35.506		0.588804
chr2	29897500	29897898	NM_201331	6	+		95.3484	98.3058	27.6216	18.7018		268.331	124.336	1116.59	2332.3		-0.909952
chr2	29897132	29897165	NM_213644	7	-		5.55882	29.0882	78.9118	238.765		268.331	124.336	1116.59	2332.3		0.975885
chr2	29964480	29964569	NM_001002440	4	-		33.0778	46.5556	25.2444	37.4111		82.717	46.182	64.291	78.472		-0.497603
chr2	30195738	30196238	NM_001007391	4	+		39.4052	17.2196	16.5389	13.489		29.272	10.657	23.401	15.952		0.755999
chr2	30454837	30455004	NM_199994	10	+		235.44	200.363	84.5179	47.9762		93.805	2.605	73.852	70.882		-0.187263
chr2	30626902	30627164	NM_001130589	3	-		38.2624	96.5437	82.4905	78.6654		404.049	190.648	191.614	130.573		-0.876473
chr2	30618942	30618993	NM_001098736	7	+		5.55769	14.0769	11.5385	22.9038		42.135	22.736	41.393	29.717		-0.618532
chr2	31153268	31153463	NM_200120	15	+		138.724	5.45408	23.7602	16.551		276.536	165.544	87.44	2.058		0.774048
chr2	31098311	31098760	NM_001122840	10	+		2.58889	1.48444	15.4711	5.99778		2.439	11.131	69.323	41.938		0.944212
chr2	31401819	31402130	NM_001197300	8	-		41.859	20.4135	5.55128	6.28205		108.22	42.156	2.894	5.789		0.999115
chr2	31401819	31402130	NM_205615	3	-		41.859	20.4135	5.55128	6.28205		108.22	42.156	2.894	5.789		0.999115
chr2	31524534	31525095	NM_001080571	14	+		187.201	61.4786	28.8167	19.5979		49.009	33.393	22.143	20.197		0.975415
chr2	31556321	31556413	NM_001002320	9	+		5.17204	15.2043	5.51613	5.25806		60.763	157.492	46.551	39.751		0.98477
chr2	31551906	31552233	NM_001002416	3	+		24.9848	15.875	2.4939	12.3537		416.024	215.516	94.612	47.598		0.842764
chr2	31660300	31660461	NM_001166015	9	+		13.037	0.876543	2.81481	0.938272		152.794	38.603	23.653	12.092		0.971444
chr2	31734155	31734318	NM_200172	3	+		13.0183	4.17073	20.878	54.4207		15.302	9.71	40.26	69.596		0.970817
chr2	31979785	31979851	NM_200070	11	-		116.701	13.1343	3.34328	5.59701		68.081	103.968	22.521	28.302		0.289808
chr2	32231301	32231393	NM_201315	16	-		127.409	109.806	15.5376	8.51613		581.015	1051.76	198.534	169.423		0.825014
chr2	32292697	32292745	NM_213298	3	-		251.878	43.7551	13.2245	29.7143		96.023	33.393	19.501	25.6		0.998634
chr2	32461681	32461905	NM_199830	10	+		44.9378	7.64889	4.88889	3.14222		118.642	87.627	17.488	16.338		0.813538
chr2	32543745	32543765	NM_200213	5	-		6.38095	16.3333	11.0952	1.90476		25.503	42.156	35.228	7.333		0.967519
chr2	32564514	32564716	NM_001002637	3	+		77.8424	18.9901	1.94581	11.9606		148.802	12.078	7.926	14.794		0.983697
chr2	32907502	32907680	NM_001076570	11	+		12.8156	36.419	35.4749	17.4525		33.486	24.867	29.44	12.736		0.103266
chr2	33404829	33405077	NM_199561	8	-		7.78313	28.9076	25.5221	76.249		123.078	20.367	116.629	115.908		0.0802168
chr2	33644834	33644998	NM_001114593	21	+		58.1333	15.3636	27.8545	20.7455		298.713	88.338	74.859	55.317		0.946021
chr2	33789639	33789893	NM_201074	12	-		8.00784	11.1922	12.1412	29.7843		14.858	7.815	37.241	31.646		0.495061
chr2	33829991	33830090	NM_213001	11	+		68.79	15.28	1.94	4.46		155.233	118.178	20.382	27.272		0.855653
chr2	34837459	34838017	NM_001089542	20	+		269.469	20.3596	11.6118	14.2558		128.4	67.023	31.453	33.319		0.942276
chr2	35312274	35312356	NM_001045358	3	+		19.2048	28.5904	39.988	79.988		20.402	5.921	17.614	24.957		0.571042
chr2	35316338	35316429	NM_212887	6	+		3.98913	45.9457	24.837	12.8043		297.825	72.707	144.685	38.078		-0.557889
chr2	35324486	35324781	NM_201308	15	+		76.25	14.5236	22.3311	10.7939		331.977	151.571	25.037	44.382		0.885971
chr2	35575074	35575183	NM_001201444	28	+		0.4	1.14545	19.3	7.56364		10.201	41.919	88.95	60.977		0.915742
chr2	36394448	36394766	NM_199740	11	-		67.3856	58.4545	50.7022	48.1442		83.161	98.048	40.764	34.605		0.806899
chr2	36326838	36327013	NM_001007168	8	+		10.0284	3.69318	10.4034	0.784091		246.377	160.097	39.128	9.777		0.409208
chr2	36442291	36442344	NM_212933	8	+		21.3519	18	21.9444	19.9074		392.961	202.016	213.38	136.105		0.423291
chr2	36819263	36819615	NM_001013536	5	-		301.688	39.6601	16.4816	15.5014		292.503	136.651	38.751	23.284		0.943497
chr2	36764324	36764379	NM_001002397	4	-		19.5536	4.16071	7.66071	2.58929		9.757	3.789	20.13	20.197		-0.237854
chr2	36854933	36854971	NM_131452	6	-		283.59	167.513	197.282	277.179		554.625	686.334	591.071	532.455		-0.9042
chr2	36861300	36861377	NM_001017399	8	+		4.91026	8.29487	8.33333	3.89744		64.533	40.972	25.792	29.331		-0.294245
chr2	36897686	36897844	NM_001001941	29	+		28.7547	23.9371	48.2013	56.7862		129.73	81.47	195.766	228.856		0.984387
chr2	37015920	37016992	NM_001128817	1	+		15.0363	26.3402	3.20596	3.50885		39.474	29.841	2.642	2.316		0.80151
chr2	36966225	36966320	NM_001025530	8	+		68.9896	44.2708	8.17708	5.05208		161.886	254.829	173.748	51.071		0.499357
chr2	37201518	37201616	NM_001015067	15	+		26.2828	33.0808	4.11111	8.13131		18.406	21.788	11.952	14.022		0.989799
chr2	37201501	37201616	NM_001045244	15	+		23.5517	30.6897	3.50862	6.93966		18.406	21.788	11.952	14.022		0.991703
chr2	37352654	37353729	NM_001142672	21	-		23.921	5.15613	5.79926	7.15242		69.411	25.578	80.772	92.495		0.131627
chr2	37258585	37258714	NM_214818	21	-		19.7846	22.3231	10.5077	1.66154		164.325	184.728	54.603	32.933		0.96175
chr2	37405274	37405418	NM_199584	13	-		25.1172	32.2345	5.11034	5.53793		107.554	72.944	33.341	36.663		0.808278
chr2	37612329	37613058	NM_212983	5	-		108.695	73.9055	27.637	47.537		75.842	26.525	18.872	24.185		0.89753
chr2	37575659	37575691	NM_001204270	18	+		24.303	10.1212	22.5758	11.3939		37.478	25.341	28.308	11.192		0.765133
chr2	37536555	37536622	NM_001076578	7	+		2.10294	3.32353	7.38235	9.51471		27.055	9	22.395	11.707		-0.314419
chr2	37728017	37728095	NM_213079	9	+		234.456	26.4937	26.5823	21.3544		1541.24	728.016	289.874	210.203		0.932778
chr2	37758286	37758682	NM_001111162	4	+		117.363	30.0101	32.1537	14.5164		146.584	95.679	33.089	25.214		0.867723
chr2	37928902	37929212	NM_001244795	3	+		0.321543	3.209	0.466238	1.5627		27.498	50.682	103.167	32.418		-0.194007
chr2	37928184	37928547	NM_001244794	3	+		0.343407	1.02198	1.6511	0.417582		27.498	50.682	103.167	32.418		0.972971
chr2	37929362	37929523	NM_001007177	3	+		8.04321	10.0864	7.80247	22.2099		3.992	4.026	6.291	9.134		0.849196
chr2	37974111	37974284	NM_001007120	2	+		21.6897	25.1437	22.3391	4.7069		113.985	176.439	77.501	16.466		0.865911
chr2	38065673	38065775	NM_001007183	16	-		46.0097	26.6311	35.0291	31.534		91.809	147.782	94.486	121.053		-0.852892
chr2	38076030	38076257	NM_131151	3	+		120.202	143.36	173.825	339.776		49.453	69.865	81.401	163.763		0.997416
chr2	38719189	38719270	NM_001001940	22	-		102.463	30.5976	75.6463	69.9268		45.461	43.814	40.889	40.523		0.168863
chr2	41583295	41583391	NM_131345	12	-		70.8969	12.7835	49.7526	18.3918		109.55	232.804	84.798	64.579		-0.406147
chr2	42301530	42301805	NM_001001832	11	+		23.1232	4.93841	14.163	4.24638		32.821	19.183	39.254	21.226		0.756587
chr2	43717976	43718181	NM_001089409	14	+		13.7476	29.7427	38.2136	45.1893		75.842	171.228	50.325	72.555		-0.182729
chr2	44405620	44405637	NM_001126388	27	-		62	75.6111	78.5	8.5		48.344	92.837	40.009	6.432		0.769908
chr2	44459932	44460096	NM_001037376	8	-		11.4667	31.7939	5.01818	4.13333		17.519	8.763	5.662	3.087		0.25384
chr2	44632700	44632892	NM_001077340	8	+		3.8342	0.953368	1.36788	0.367876		6.209	4.5	5.787	9.005		-0.260549
chr2	45032940	45032980	NM_001018124	5	-		1.46341	0.95122	3.34146	1.26829		21.511	7.342	6.165	5.918		-0.218045
chr2	45034238	45034454	NM_001020696	9	+		48.5023	41.9954	19.6452	20.6452		86.265	114.626	38.121	27.401		0.883481
chr2	45196984	45197119	NM_001014815	8	-		9.67647	10.1985	1.70588	3.15441		8.87	10.894	7.423	7.075		0.878695
chr2	45565858	45565984	NM_200438	15	-		38.6142	12.9213	12.7323	21.6929		98.019	43.103	24.911	38.593		0.93606
chr2	45718829	45719248	NM_213489	7	-		289.121	61.031	66.4905	19.881		304.478	384.612	308.369	130.444		0.292987
chr2	47803974	47804182	NM_199691	16	-		47.7177	187.311	76.5167	70.4115		83.826	80.285	147.328	107.546		-0.367468
chr2	48203228	48203425	NM_213487	27	+		6.78788	3.03535	9.18182	6.04545		41.248	33.393	37.492	44.639		0.370637
chr2	48412932	48413102	NM_199980	6	-		270.649	1.43275	46.2982	4.49123		154.789	44.05	37.367	16.724		0.976424
chr2	49601522	49601692	NM_001089323	5	+		22.3041	61.3509	19.193	9.52047		39.474	49.498	19.501	18.139		0.861175
chr2	49593524	49594175	NM_001002688	5	-		314.713	155.014	44.9663	50.5445		88.926	165.781	53.471	64.193		0.34991
chr2	50197085	50197341	NM_001111093	6	-		38.5447	16.3113	12.6693	6.96109		40.804	73.891	48.187	3.602		0.260117
chr2	50092415	50092542	NM_198808	11	+		28.9219	15.2422	1.67188	1.15625		9.314	6.631	1.636	4.631		0.91803
chr2	50430831	50430942	NM_001076601	7	-		5.50893	0.517857	10.9911	4.66964		63.202	20.131	57.874	74.227		0.570804
chr2	50376132	50376193	NM_214709	19	+		26.3548	8.41935	6.56452	0.967742		44.574	19.657	24.659	16.852		0.969821
chr2	50696396	50696514	NM_212715	13	-		22.6387	7.52941	6.69748	8.64706		79.834	76.733	16.356	24.7		0.605034
chr2	50842065	50842251	NM_199659	23	-		71.7647	11.4759	23.2727	11.9144		123.521	106.1	128.833	88.893		0.575056
chr2	51762056	51762324	NM_001100439	3	+		33.7955	13.1673	295.543	149.483		119.973	51.629	98.26	93.138		0.274324
chr2	52330988	52331647	NM_001039719	7	+		41.55	16.5561	10.2152	17.9394		17.963	6.631	16.859	10.806		0.434347
chr2	52760264	52760438	NM_001110833	8	-		25.7714	91.28	7.02286	7.40571		201.138	124.336	70.33	34.734		0.361314
chr2	53178428	53179071	NM_001007773	7	-		44.4922	21.0264	10.1227	7.89596		22.398	16.341	4.907	19.296		0.593656
chr2	53470555	53470581	NM_207080	10	-		13.8519	5.59259	2.44444	2.88889		15.967	21.315	31.579	25.085		-0.881909
chr2	54206170	54206217	NM_200690	17	+		33.6875	37.5417	7.41667	2.8125		126.847	118.889	172.993	152.185		-0.89594
chr2	55227955	55228042	NM_200747	8	+		2.21591	17.9773	50.4659	114.591		9.979	4.263	23.024	20.326		0.703198
chr2	55415411	55415567	NM_001083017	4	-		65.1019	6.24841	2.01274	0.43949		26.168	44.998	13.462	6.818		0.208357
chr2	55840148	55840324	NM_201465	10	+		50.3559	57.5254	59.096	51.3729		87.817	71.286	218.664	155.787		0.364619
chr2	56012340	56012592	NM_199675	9	-		15.1897	10.9763	16.2213	8.49407		10.866	6.394	23.024	5.66		0.830553
chr2	56343401	56344399	NM_001128342	1	-		7.5045	6.3033	4.57858	2.37938		2.439	3.789	7.297	6.818		-0.878347
chr2	56382528	56382860	NM_213474	24	+		78.1562	55.5195	31.0661	42.1291		13.084	41.919	30.321	43.224		-0.630671
chr2	56561782	56561813	NM_001037113	5	-		16.125	108.531	736.25	1391.81		84.713	43.814	484.633	481.126		0.897229
chr2	56950917	56950974	NM_200458	13	+		770.207	564.172	3730.97	4733.98		126.404	497.58	1618.59	1901.48		0.974678
chr2	57382454	57382547	NM_001030070	7	-		0.734043	0.265957	2.82979	6.52128		27.942	16.815	79.011	98.412		0.937108
chr2	57737909	57738139	NM_212769	7	+		121.468	39.697	53.381	55.0476		48.566	86.206	43.783	51.2		-0.471504
chr2	58656603	58656673	NM_201043	8	-		58.7606	38.0845	7.38028	9.4507		198.033	245.83	162.174	164.02		0.643623
chr2	58667691	58667880	NM_213288	8	+		21.1368	22.4421	4.98947	4.58947		22.841	2.842	24.282	10.549		-0.29131
chr2	58709907	58710288	NM_001002545	3	-		1.2199	1.17539	5.82723	8.85602		6.653	2.368	19.753	21.226		0.947772
chr2	58908575	58908688	NM_001009556	7	+		28.693	11.386	9.41228	13.5351		31.934	51.866	80.898	56.86		-0.853994
chr2	59246437	59246574	NM_001002546	6	+		122.246	61.2101	34.6449	45.8188		37.699	26.525	54.98	60.076		-0.516955
chr2	59495373	59495440	NM_001017797	7	-		866.103	93.5882	1396.24	554.926		381.43	847.142	1246.81	806.722		0.361189
chr2	59618800	59618869	NM_001130633	7	+		15.7143	7.75714	4.68571	26.1		11.753	15.157	26.295	44.639		0.619636
chr2	59675947	59676055	NM_200714	3	-		16.5138	16.5963	136.211	213.239		6.875	2.368	18.369	20.969		0.957025
chr2	59873260	59873398	NM_001017839	11	+		33.2518	19.4892	22.5683	27.2518		119.973	62.997	40.512	42.452		0.704232
chr3	25188000	25188192	NM_207079	10	-		16.0622	5.33161	12.9741	6.97927		66.75	139.73	99.141	71.654		-0.586225
chr3	11535864	11535970	NM_205736	12	-		3.69159	14.6168	3.54206	5		19.071	6.394	23.401	20.197		-0.972796
chr3	15729638	15729796	NM_212636	7	-		46.7296	13.5786	71.8491	81.2138		61.65	28.893	75.236	70.882		0.952356
chr3	26212390	26213130	NM_199429	11	+		60.9919	11.9582	13.1714	22.8286		43.243	32.446	15.852	19.554		0.756659
chr3	42959732	42959881	NM_131503	10	+		54.9267	22.4067	30.9933	20.3267		174.304	179.044	349.006	461.958		-0.548962
chr3	52304910	52305061	NM_001040245	13	+		34.5658	10.7171	2.83553	7.01974		75.399	41.445	15.978	29.845		0.981194
chr3	56617106	56617315	NM_131561	11	+		34.9333	9.05238	39.4143	32.6762		41.248	44.761	55.735	93.524		0.277972
chr3	126920	127042	NM_200075	8	+		12.7967	3.78862	20.4065	8.09756		88.483	36.472	64.165	23.156		0.602159
chr3	368735	368758	NM_212599	19	+		203.208	51	103.417	82.0833		66.307	177.149	218.915	253.299		-0.793491
chr3	5067443	5067635	NM_001089332	23	-		46.2902	8.23834	5.37824	5.20207		29.716	20.367	10.191	12.092		0.900137
chr3	6161565	6161664	NM_212977	10	-		290.59	47.78	190.88	163.9		290.951	716.885	407.51	316.72		-0.880895
chr3	6945572	6945696	NM_001003422	4	+		48.696	48.592	81.456	108.224		62.758	69.154	349.006	352.611		0.928554
chr3	9814781	9814967	NM_001113625	19	+		1.99465	0.775401	0.737968	3.58289		6.431	6.158	10.82	9.52		0.14281
chr3	10133854	10134029	NM_001113625	19	-		17.1648	9.25	15.9943	28.4545		7.762	10.657	23.779	19.296		0.403615
chr3	13240203	13240325	NM_213222	10	-		33.2846	29.0569	8.01626	19.8618		76.729	96.864	112.603	91.98		-0.869586
chr3	13518782	13519027	NM_001018135	24	-		11.5366	19.1585	22.3699	27.8821		27.277	27.709	32.586	44.125		0.869089
chr3	14246654	14246943	NM_001080084	18	+		46.0517	16.8655	4.52414	4.72759		3.548	2.368	7.549	16.852		-0.596873
chr3	15620047	15620108	NM_130928	5	-		0.919355	2.41935	115.629	69.0484		10.866	11.368	67.688	84.39		0.863613
chr3	15079476	15079661	NM_153663	13	-		209.823	41.2581	22.5215	29.3441		183.84	202.964	66.304	105.745		0.530744
chr3	15338915	15338952	NM_201325	17	-		6.78947	10.8947	6.92105	8.65789		4.213	3.316	19.879	90.05		0.0219551
chr3	14814864	14814971	NM_199823	8	-		204.602	36.2037	42.037	4.74074		172.087	41.682	63.033	12.35		0.990636
chr3	14956877	14957032	NM_213443	11	-		16.9744	99.9231	8.17308	15.25		69.633	110.6	129.085	69.339		0.271726
chr3	18614315	18614404	NM_200043	9	-		1.24444	25.5111	6.3	21.1778		12.862	6.631	32.837	38.593		-0.0436271
chr3	18102065	18102544	NM_001103113	9	-		27.4292	7.69792	5.25625	1.58125		8.427	10.894	5.41	32.675		-0.480574
chr3	23866063	23866356	NM_001076559	16	-		7.95578	2.52721	50.1395	26.4626		10.201	87.627	949.891	756.68		0.941066
chr3	23752995	23753195	NM_205716	13	-		89.7065	62.204	35.0448	17.5821		163.66	368.508	194.256	137.906		0.267243
chr3	25470634	25470824	NM_001114426	20	-		24.0157	4.59162	10.8272	10.3717		5.988	19.657	20.508	16.595		-0.929737
chr3	25592062	25592237	NM_213035	5	-		42.892	85.3864	42.75	56.0455		3.105	11.368	1.384	2.187		0.938109
chr3	26039049	26039091	NM_001017538	12	+		26.4419	17.6279	11.3256	19.7674		82.495	29.13	40.638	43.481		0.774824
chr3	26745784	26746126	NM_212704	19	-		62.4869	6.81924	15.2595	13.0496		129.73	103.495	83.037	78.344		0.816995
chr3	26863548	26863682	NM_001080625	13	+		19.6222	16.6148	9.53333	8.04444		27.055	24.394	24.911	8.876		0.704698
chr3	28066313	28066389	NM_001177460	11	-		5.90909	1.74026	4.32468	2.28571		47.235	26.999	17.866	15.051		0.666028
chr3	27864777	27864799	NM_201157	7	+		11.6087	8.86957	2	2.73913		12.862	16.104	29.944	49.914		-0.832271
chr3	31852578	31852629	NM_001004551	13	-		39.5385	10.8846	1.98077	8.92308		74.068	96.153	110.087	96.868		-0.976442
chr3	32886668	32886908	NM_199809	6	+		71.4647	7.90871	1.17012	4.6639		83.382	7.579	3.145	3.859		0.999157
chr3	34205528	34205627	NM_173221	10	+		2.84	8.65	1.89	0.43		79.834	43.103	55.106	34.605		-0.0731988
chr3	35091025	35091339	NM_200978	17	+		54.0476	11.3111	4.9873	2.4127		39.474	35.761	16.607	11.835		0.765989
chr3	36208978	36209431	NM_199583	9	-		240.04	84.8128	46.6256	56.707		299.6	169.807	193.375	184.732		0.941191
chr3	35897344	35897422	NM_001017817	9	+		61.8734	48.8861	20.7468	29.6582		80.943	2.368	68.065	72.812		-0.167287
chr3	36573917	36574038	NM_001004552	23	-		89.5984	28.2787	2.27869	2.72951		89.37	75.075	25.414	27.53		0.888744
chr3	47698985	47699186	NM_001017696	5	+		21.7624	18.3366	60.1337	97.7327		547.307	71.523	249.991	314.919		0.0203465
chr3	48319131	48319492	NM_001030128	18	+		77.3011	8.90055	15.1133	16.8757		43.022	47.129	86.308	91.079		-0.542281
chr3	50607650	50608063	NM_001077292	7	-		52.2391	19.6232	17.6473	18.4855		15.08	7.105	6.794	9.777		0.936129
chr3	53183035	53183275	NM_001013537	13	+		53.5021	35.2448	6.32365	14.7967		58.323	42.629	10.946	23.928		0.994844
chr3	55458683	55458838	NM_131189	34	-		354.75	3.32692	38.1603	11.6538		379.655	136.414	93.228	55.574		0.965038
chr3	55351531	55351822	NM_001007403	14	-		20.0479	4.51027	3.04452	1.0411		120.416	36.709	42.147	15.952		0.988622
chr3	55700758	55701356	NM_001144782	16	+		17.6294	4.14524	4.14524	2.23706		57.214	47.603	16.23	15.566		0.756639
chr3	55844303	55844589	NM_001002228	18	-		2.11847	5.67596	6.33449	17.0209		10.201	8.763	12.078	31.003		0.957706
chr3	58593486	58593689	NM_001080585	6	-		17.1961	11.7941	9.52451	12.8529		24.172	14.21	21.262	26.115		0.399446
chr3	58343991	58344211	NM_214682	14	-		14.181	11.4751	13.7692	17.0498		71.407	65.839	92.221	98.412		0.799369
chr3	60286647	60287017	NM_001105108	6	+		1007.43	934.431	346.04	382.1		131.061	268.565	127.072	117.194		0.552019
chr3	61217837	61218342	NM_199651	3	-		14.496	40.33	31.915	61.2213		2.439	13.499	21.514	31.646		0.89964
chr3	62123487	62123773	NM_001017830	3	+		72.8537	24.6376	3.66202	1.32404		86.709	33.867	18.998	10.806		0.996163
chr3	125539	125597	NM_001013505	10	-		1.55932	10.9322	6.47458	15.0508		90.479	56.839	58.503	95.325		0.0419763
chr3	34919	35053	NM_205715	7	-		7.86667	6.32593	8.11852	16.037		18.85	4.263	17.488	15.18		0.297788
chr3	405572	405761	NM_001045295	13	+		25.8158	13.0158	52.9579	50.0684		47.013	56.602	64.794	59.819		0.651918
chr3	733672	733934	NM_200640	6	-		46.4943	7.03042	34.4106	22.6388		2.883	4.973	28.811	29.073		0.00178067
chr3	1011520	1011580	NM_001109863	6	+		8.63934	44.3279	21.0164	6.31148		15.08	18.946	12.456	4.503		0.742474
chr3	1128447	1128564	NM_001109718	7	-		2.38983	18.7458	3.64407	3.33898		17.076	11.368	9.436	4.503		0.044177
chr3	1955453	1955603	NM_200968	3	+		5.09272	3.8543	215.411	416.113		38.808	13.499	368.13	365.733		0.906708
chr3	1923514	1923665	NM_200290	7	+		50.5132	148.441	82.2105	76.1184		229.745	143.756	99.644	78.73		-0.258368
chr3	1880240	1880470	NM_001089466	22	+		83.3896	23.1212	30.342	43.3117		22.841	48.55	45.544	64.708		-0.697072
chr3	1996987	1997154	NM_199710	4	+		100.042	35.5655	49.6667	98.5476		12.862	11.131	20.382	34.605		0.470217
chr3	1992510	1992565	NM_001017579	7	+		8.19643	12.5179	42.0536	52.3393		35.482	19.183	49.445	44.511		0.763885
chr3	2579929	2580115	NM_001002544	5	-		30.7273	49.2353	48.3316	36.3422		76.951	79.575	227.722	176.241		0.306951
chr3	4143618	4143786	NM_001077336	13	+		2.63314	0.846154	2.05325	1.26627		52.336	20.841	43.531	16.08		0.941885
chr3	5068733	5068781	NM_001076616	16	+		3.7551	7.42857	36.2041	36.1429		15.523	8.289	44.664	43.867		0.970857
chr3	5651544	5651771	NM_001020661	4	+		90.2763	6.45614	5.95614	4.51754		280.306	107.995	27.05	101.371		0.938125
chr3	5689081	5689406	NM_001002476	6	+		26.2546	74.5491	76.7117	62.5092		16.632	13.736	21.011	15.694		0.133172
chr3	5875152	5875184	NM_205641	5	-		59.6061	15.6364	21.8788	51.6061		15.745	11.842	34.347	70.239		0.337601
chr3	6943109	6943267	NM_001003625	10	-		9.13208	1.60377	29.0755	44.7296		10.866	13.262	37.744	26.758		0.737597
chr3	6969972	6970124	NM_205613	5	+		720.673	373.248	192.425	292.699		144.367	92.127	77.375	105.616		0.94143
chr3	8194207	8194704	NM_001104940	15	+		30.9317	38.1627	26.6888	35.2108		49.009	76.496	26.798	39.622		0.82114
chr3	8299799	8299902	NM_201111	10	+		112.817	11.1346	2.97115	3.69231		139.488	82.654	51.709	39.493		0.937518
chr3	10231975	10232026	NM_199761	7	+		253.154	153.154	74.4615	85.7308		93.583	148.493	74.23	116.036		0.0863121
chr3	10535561	10535655	NM_194373	5	+		205.442	259.074	47.7053	26.6		67.194	227.831	69.449	43.996		0.763236
chr3	10811210	10811360	NM_001130786	6	-		5.56291	9.59603	0.503311	1.00662		16.189	7.815	2.39	15.051		0.104605
chr3	11875940	11876231	NM_001077334	4	-		4.38699	4.41438	1.67123	2.59247		6.875	3.552	2.768	6.561		0.34606
chr3	11800280	11800552	NM_001037419	8	+		50.0037	44.7692	28.641	11.8645		64.533	60.392	31.328	40.008		0.806128
chr3	12363488	12363658	NM_001076756	6	+		3.44444	2.84795	6.34503	1.59649		19.959	18.946	27.302	4.245		0.892617
chr3	12810499	12810647	NM_200804	5	+		0.751678	0.174497	17.7651	24.6376		56.106	2.605	33.089	49.013		0.356549
chr3	12953644	12953886	NM_201313	11	+		20.8313	26.251	9.8107	14.4815		38.365	19.894	18.62	33.833		0.0866839
chr3	13605235	13605307	NM_001080686	4	-		14.0959	3.41096	4.56164	4.68493		56.993	72.944	55.987	42.71		-0.116624
chr3	13606128	13606201	NM_200386	5	+		83.1216	65.0946	52.0676	118.284		56.993	72.944	55.987	42.71		-0.70892
chr3	13591547	13591754	NM_001002679	5	-		32.1731	5.21635	2.52885	0.365385		116.646	54.708	25.414	14.665		0.969198
chr3	14216092	14216170	NM_200408	8	+		0.772152	1.40506	2.1519	0.455696		6.209	2.605	3.397	4.503		-0.62002
chr3	14832101	14832260	NM_001077151	7	-		0.49375	0.725	3.475	3.64375		70.964	13.262	21.262	18.139		-0.530109
chr3	14999093	14999305	NM_212684	24	+		66.338	85.0563	24.9765	63.9296		21.954	37.182	35.857	36.02		-0.0975559
chr3	15272004	15272259	NM_199815	8	-		74.3945	16.5156	13.6211	5.57812		44.352	49.734	22.772	10.163		0.564888
chr3	15283378	15283626	NM_213535	2	-		218.843	182.289	18.2851	11.5141		565.935	383.191	53.345	34.476		0.988291
chr3	15422308	15422437	NM_001013318	3	+		31.7923	32.0231	28.4846	10.2769		18.628	51.155	46.299	24.185		0.401642
chr3	15341477	15341503	NM_201297	7	+		33.7037	33.1481	41.5926	87.5926		76.729	57.076	71.965	134.046		0.970633
chr3	15433624	15433685	NM_001017400	2	+		45.8548	5.20968	13.4516	15.8871		54.775	98.048	15.852	68.181		-0.24322
chr3	15497662	15497817	NM_199575	5	+		114.673	59.9103	95.391	93.3269		97.575	180.701	99.644	102.529		-0.923435
chr3	15675348	15675444	NM_001105136	4	-		9.56701	16.3196	22.4433	41.4742		58.101	51.392	36.863	58.404		0.113307
chr3	15630868	15630939	NM_001007376	4	-		17.6528	18.9722	5.36111	13.4306		188.719	76.496	91.718	94.681		0.307176
chr3	15675141	15675383	NM_173255	3	-		112.465	200.621	273.934	685.453		58.101	51.392	36.863	58.404		0.239525
chr3	15761617	15761876	NM_200846	7	-		16.3	64.3885	14.2846	7.64231		128.4	221.436	48.816	17.238		0.912079
chr3	15849923	15849952	NM_213208	6	+		106.1	423.033	588.067	2165.87		33.042	13.736	233.761	215.349		0.641287
chr3	16033486	16033616	NM_200508	28	-		15.5344	41.7099	29.5878	31.1756		89.148	149.914	202.182	142.279		0.563254
chr3	16339128	16339225	NM_001039810	27	-		5.72449	27.4694	2.85714	8.56122		169.647	139.493	133.111	123.626		-0.104923
chr3	16284241	16284516	NM_200258	5	+		143.518	67.1014	61.7246	24.0833		103.563	245.356	60.642	45.282		0.179155
chr3	16461965	16461996	NM_001077729	8	+		12.6562	4.25	1	1.40625		164.325	83.364	8.933	9.648		0.974828
chr3	16542257	16542290	NM_212672	21	+		17.9118	1.58824	8.97059	10.4118		92.031	72.707	53.345	92.495		0.498477
chr3	16650645	16650833	NM_131479	24	+		14.3122	10.1958	16.3016	3.2963		55.44	38.366	54.729	41.037		0.788959
chr3	17259439	17259595	NM_201501	6	+		85.758	24.1019	14.6051	16.0255		354.153	265.96	130.72	240.177		0.823447
chr3	17779606	17779897	NM_200116	7	+		6.7089	10.5514	2.35274	2.80137		26.39	10.421	4.152	2.444		0.480986
chr3	17918025	17918136	NM_198363	2	-		23.5714	115.714	24.1518	14.1696		224.866	169.334	86.056	33.962		0.379364
chr3	18113180	18113387	NM_200103	5	-		153.5	189.288	147.788	92.3413		162.108	189.938	169.974	116.294		0.981932
chr3	18128256	18128394	NM_213279	7	+		131.281	51.1799	1857.78	2927.53		38.365	55.892	389.393	826.019		0.98187
chr3	18139669	18139894	NM_200730	4	-		15.8097	16.4071	49	68.7611		67.194	19.42	137.137	185.632		0.961211
chr3	18558881	18559024	NM_001025513	14	-		26.5833	27.4028	3.90972	4.54861		24.837	30.314	8.304	3.602		0.97421
chr3	18578128	18578220	NM_001080991	11	+		11.4946	3.75269	5.93548	0.741935		63.202	18.946	17.236	15.823		0.895662
chr3	18617478	18618451	NM_001020728	1	+		25.0534	4.19918	10.9517	15.5062		2.439	2.842	3.02	7.333		0.0344375
chr3	18627008	18627178	NM_178288	4	-		44.1813	57.6374	9.53801	5.98246		78.282	57.076	11.323	10.163		0.888764
chr3	18629421	18629469	NM_001004003	25	+		47.1837	8.63265	6.81633	3.06122		668.389	802.618	321.957	458.485		0.383738
chr3	19177812	19177845	NM_001024440	6	+		16.9118	5.61765	5.35294	13.6471		94.249	26.525	50.2	39.365		0.711964
chr3	19158398	19158572	NM_001002041	19	+		54.0114	23.6286	39.5886	2.84571		30.603	42.866	85.679	2.187		0.53409
chr3	19552579	19552746	NM_001017902	9	+		261.25	249.238	39.5	62.1488		189.606	230.436	85.931	39.493		0.930462
chr3	19573092	19573681	NM_001110417	21	+		88.0186	51.4186	24.0593	20.7458		199.807	274.723	52.967	52.615		0.710198
chr3	19900139	19900284	NM_001005573	3	+		3.73288	5.58904	11.4452	8.69863		3.992	23.446	22.646	24.442		0.687759
chr3	19801556	19802288	NM_001007051	6	+		11.6398	13.5784	10.1651	45.5198		43.909	21.552	15.475	110.762		0.959582
chr3	19995350	19995496	NM_194418	4	-		1.44898	1.03401	13.0272	2.40816		4.879	3.552	29.315	23.799		0.773843
chr3	19952887	19952914	NM_001005395	22	-		35.8214	46.0714	13.7857	17.4643		35.038	125.994	60.642	40.909		0.61888
chr3	20007540	20007627	NM_194417	4	-		85.3523	15.3523	88.0114	122.136		147.471	264.303	270.121	382.328		0.341965
chr3	21152349	21152454	NM_199637	7	-		135.264	7.33019	8.4717	9.15094		77.173	31.972	11.072	21.355		0.953898
chr3	21184797	21184991	NM_212956	12	-		1.77949	19.159	35.7179	70.3795		19.293	62.286	37.996	65.865		0.693375
chr3	21350239	21350346	NM_207088	6	-		101.185	48.9167	15.1019	7.96296		244.603	252.698	49.319	29.588		0.850931
chr3	21493085	21493434	NM_001006067	4	-		4.76571	4.87714	0.434286	33.7914		3.77	3.552	1.384	35.377		0.99758
chr3	22249173	22249321	NM_201449	19	+		179.221	93.0403	37.557	29.5302		310.466	416.348	131.601	71.011		0.684696
chr3	23275366	23275501	NM_214817	5	+		251.919	166.522	34.6618	77.4338		248.373	170.518	55.484	96.354		0.999759
chr3	23895410	23895475	NM_213028	5	-		56.8485	19.9091	98.0455	73.9091		599.421	229.488	114.364	195.666		-0.306172
chr3	23887384	23888111	NM_001002330	7	-		10.592	16.0865	10.5632	10.4602		32.599	7.579	3.9	3.988		-0.200592
chr3	24351719	24351923	NM_199746	6	+		298.278	251.795	58.6195	49.6098		376.551	804.275	544.646	128.386		0.436397
chr3	24498588	24498801	NM_199899	13	+		6.19626	7.60748	45.7523	59.1028		68.081	30.314	88.95	82.975		0.757294
chr3	24385850	24385886	NM_131507	13	+		15.8108	9.78378	8.72973	3.51351		61.428	38.366	54.351	38.593		0.762056
chr3	25249213	25249303	NM_001083840	6	-		15.6044	0.373626	10.7143	9.37363		31.712	32.446	8.178	11.192		-0.216571
chr3	25208956	25209069	NM_001083544	5	-		71.9825	16.3158	49.3596	37.7544		36.369	36.235	27.05	38.336		-0.169271
chr3	25188893	25188987	NM_199769	13	+		54.2737	7.08421	8.78947	2.97895		66.75	139.73	99.141	71.654		-0.495501
chr3	25268071	25268748	NM_001089346	2	+		34.8702	19.3156	13.0811	21.472		5.988	30.551	11.449	21.998		-0.436638
chr3	25376510	25376613	NM_212612	13	-		404.337	314.5	198.683	186.442		583.232	2205.84	1247.57	798.232		-0.0364461
chr3	25958274	25958429	NM_001127478	6	+		16.8654	9.59615	1.33974	0.974359		5.101	4.263	1.51	1.544		0.976219
chr3	26112009	26112787	NM_001003764	2	-		12.1335	3.26316	12.389	7.79974		18.628	13.026	16.356	19.554		0.602281
chr3	26230646	26230887	NM_001040348	6	+		72.7355	19.9504	39.6405	31.095		206.016	197.753	212.373	216.378		0.115249
chr3	26671314	26671452	NM_212762	4	-		309.518	1538.48	3634.41	14177.7		93.583	103.968	953.414	1074.04		0.789133
chr3	26675883	26676188	NM_001045389	9	+		23.6895	9.41503	8.54575	10.4412		3.105	3.552	10.568	8.748		-0.618991
chr3	26791167	26791264	NM_001110414	9	+		43.5714	54.3061	24.2143	34.898		386.974	317.589	110.59	39.493		0.729703
chr3	26843469	26843510	NM_212790	5	+		542.262	177.833	18.5476	7.21429		243.716	401.901	19.501	15.051		0.54919
chr3	26811580	26811733	NM_213352	8	-		5.26623	17.4481	4.44805	9.40909		91.587	113.915	40.512	30.231		0.570424
chr3	26812798	26813172	NM_201507	9	+		59.5867	76.7013	29.0613	48.2613		68.524	80.049	58.755	82.975		0.647095
chr3	26998912	26999442	NM_001002578	8	-		69.049	30.7815	47.9736	53.7458		240.611	184.728	116.252	116.808		0.344344
chr3	27015569	27015679	NM_001076660	10	-		0.198198	0.495495	13.7477	4.63063		9.536	15.394	25.163	22.899		0.836741
chr3	27035359	27035630	NM_178436	16	-		28.4559	89.3787	169.963	146.504		233.515	231.146	254.017	279.671		0.714682
chr3	27044727	27045047	NM_001172554	9	-		101.04	36.4766	17.7695	51.7726		29.938	30.788	11.323	32.547		0.582498
chr3	27752444	27752848	NM_199781	3	-		30.6593	60.5506	32.3457	35.042		130.839	98.285	109.08	3.602		0.0273166
chr3	27816284	27816476	NM_001077537	25	+		36.5492	9.09845	7.80829	14.7617		88.926	36.946	63.913	43.096		0.797238
chr3	27949322	27949365	NM_200562	5	+		20.7727	143.136	50.6818	132.727		39.03	7.342	79.64	87.349		-0.153129
chr3	27937805	27937959	NM_001082872	7	+		69.9419	2.76129	9.78065	7.47742		32.599	11.368	17.488	17.367		0.972556
chr3	28031275	28031422	NM_201498	16	-		18.5676	5.97973	3.91892	3.58108		43.909	45.471	19.375	20.326		0.657979
chr3	28982650	28982794	NM_001104649	19	+		1.9931	9.50345	3.86897	4.29655		10.866	6.868	11.323	6.432		-0.645692
chr3	29011410	29011701	NM_199867	13	+		4.25685	2.57877	8.0411	2.40411		111.768	22.025	8.933	5.403		-0.0570545
chr3	29661961	29662214	NM_001002061	7	+		10.3307	35.7835	1.50787	4.50787		21.733	19.183	3.649	10.935		0.629418
chr3	29792114	29792185	NM_200016	16	+		13.0694	17.7778	355.653	321.264		46.126	51.866	133.236	162.734		0.959865
chr3	30042481	30042575	NM_200486	12	-		27.2105	22.1368	17.8737	15.3684		800.558	129.783	108.2	128.515		0.845589
chr3	30050314	30050345	NM_199724	5	-		34.5938	21.0625	585.844	871.594		17.076	35.998	292.265	445.878		0.998385
chr3	30022383	30022467	NM_001001590	9	-		1.18824	3.37647	6.69412	14.0235		118.199	274.249	874.403	1836		0.99618
chr3	30304285	30304355	NM_001045463	13	-		17	5.08451	2.61972	1.90141		192.489	158.203	155.883	41.552		0.661305
chr3	30399274	30399409	NM_001102389	7	-		21.0809	1.09559	35.2059	14.6912		78.06	31.262	141.037	103.301		0.914503
chr3	30337363	30337415	NM_001024394	16	-		26.5472	7.75472	6.41509	7.11321		147.693	40.024	25.792	31.646		0.998949
chr3	30399274	30399409	NM_001163918	8	-		21.0809	1.09559	35.2059	14.6912		78.06	31.262	141.037	103.301		0.914503
chr3	30639021	30639182	NM_214766	19	-		63.7099	28.0123	15.216	10.0123		37.256	61.339	27.176	20.326		0.335751
chr3	31060095	31060603	NM_214811	7	-		551.709	379.104	154.326	159.737		210.452	370.402	159.28	159.646		0.463172
chr3	31266906	31267066	NM_201112	7	-		358.516	31.7702	64.5652	116.298		123.078	15.631	52.716	75.385		0.93727
chr3	31237699	31237846	NM_001076669	13	-		18.9865	7.14189	4.58784	5.35135		39.695	6.631	4.529	2.573		0.993337
chr3	31309301	31309556	NM_001080044	62	-		10.3438	8.04297	17.1953	21.5156		16.189	32.683	46.928	48.113		0.78536
chr3	31230283	31230364	NM_001142954	4	-		49.5488	56.9512	38.1829	36.3049		46.57	44.524	36.738	31.904		0.88444
chr3	31737579	31737785	NM_200658	5	+		56.5652	13	19.2609	5.44444		71.629	72.944	58	25.343		0.585599
chr3	31854484	31854766	NM_200069	7	+		243.042	183.827	128.24	213.484		66.972	155.124	129.839	133.532		-0.597471
chr3	32034004	32034130	NM_199911	12	+		4.18898	8.50394	4.7874	5.06299		59.876	51.629	54.98	60.848		-0.795666
chr3	32061457	32061565	NM_001004536	10	-		17.1101	51.2018	13.6972	13.8165		161.664	628.311	446.26	146.396		0.778978
chr3	32029864	32029984	NM_001037805	18	-		70.9256	70.3636	18.5372	15.3884		275.871	284.196	178.781	95.968		0.939048
chr3	32062084	32062228	NM_001003875	10	+		230.938	157.455	134.814	53.2276		161.664	628.311	446.26	146.396		0.0969666
chr3	32216570	32216690	NM_001013296	6	-		3.34711	0.628099	2.29752	1.10744		68.968	22.262	8.429	7.59		0.704815
chr3	32217378	32217675	NM_001079954	16	+		7.18792	5.83893	0.694631	0.88255		68.968	22.262	8.429	7.59		0.849057
chr3	32499879	32499997	NM_200650	10	-		21.521	4.19328	7.16807	3.59664		593.655	658.625	1003.87	1018.6		-0.613335
chr3	32547753	32548044	NM_001005931	7	+		260.116	48.0068	22.7329	9.07877		276.536	235.409	59.384	51.457		0.776189
chr3	32669620	32669966	NM_001007434	9	+		32.487	13.1412	5.67147	4.23919		83.161	86.917	40.386	21.226		0.75061
chr3	32835448	32835542	NM_201083	15	+		31.3579	2.4	25.7474	23.2737		10.866	25.814	87.818	58.533		0.182486
chr3	32818299	32818624	NM_212742	11	+		139.598	238.331	72.4877	52.0153		165.212	105.153	146.698	52.229		0.200227
chr3	32768311	32768514	NM_001030075	14	+		20.9853	23.0637	20.2255	3.19608		96.023	237.304	168.967	66.637		0.720479
chr3	32788695	32788795	NM_001006095	13	+		50.3267	14.0594	22.4158	16.0693		65.863	42.866	20.13	19.425		0.780244
chr3	32969521	32969578	NM_200961	7	+		84.8103	126.224	9.08621	2.96552		147.693	208.174	116.629	27.53		0.890744
chr3	33102709	33102818	NM_001020497	8	-		8.08182	3.38182	3.79091	4.70909		37.699	22.025	47.306	49.27		0.130977
chr3	33038911	33039120	NM_001076584	3	-		10.5524	1.03333	1.77619	1.75238		9.757	5.684	5.284	4.503		0.963411
chr3	33250503	33250684	NM_131399	8	-		61.3297	46.3736	29.7582	32.1758		158.116	127.178	139.905	141.636		0.497405
chr3	33561672	33561701	NM_200732	5	-		94.9667	11.1333	420.6	296.733		41.026	74.128	314.03	485.371		0.786941
chr3	33628134	33628264	NM_213330	21	-		12.2824	16.0153	8.12214	6.07634		69.633	33.393	8.304	10.677		0.599141
chr3	33574953	33575177	NM_213475	12	+		120.364	40.2222	48.1822	31.9511		80.278	66.312	22.898	28.687		0.70665
chr3	34026482	34026613	NM_199729	12	-		114.197	38.9091	23.8712	4.60606		134.387	113.205	110.213	18.782		0.726689
chr3	34266265	34266378	NM_001020561	2	+		3.33333	9.83333	9.94737	9.18421		159.003	66.076	23.401	18.911		-0.924056
chr3	34221622	34221668	NM_001020684	7	-		115.021	13.2766	32.5532	52.1064		46.348	25.814	28.182	35.248		0.990702
chr3	34234627	34234778	NM_001003645	16	+		106.789	26.2303	126.612	129.803		42.578	112.021	243.575	477.009		0.54029
chr3	34319352	34319444	NM_213197	10	+		119.022	40.4086	68.3871	41.1613		98.019	123.389	61.774	56.989		0.0999723
chr3	34265506	34265744	NM_001003500	9	-		9.64435	1.43515	5.29289	2.81172		159.003	66.076	23.401	18.911		0.743786
chr3	34838567	34838817	NM_131396	10	-		5.76494	2.80478	1.61355	0.302789		28.385	10.657	9.562	10.034		0.909439
chr3	34902076	34902197	NM_001166238	13	-		25.7869	25.0164	22.4426	20.918		123.743	135.23	91.089	128.386		0.30607
chr3	35071229	35071253	NM_201298	11	+		40.56	194.48	20.08	99.44		55.662	118.415	92.976	156.302		0.520269
chr3	35491442	35492459	NM_001003873	3	+		30.112	16.8379	26.054	14.0521		48.787	131.204	96.876	83.232		-0.60094
chr3	35491442	35492459	NM_001193674	17	+		30.112	16.8379	26.054	14.0521		48.787	131.204	96.876	83.232		-0.60094
chr3	35627431	35627643	NM_001076753	7	+		21.7183	24.493	4.96244	1.85446		53.444	17.289	72.72	107.803		-0.909941
chr3	35639978	35640097	NM_001002497	6	-		3.6	2.325	3.7	8.125		49.896	7.105	20.13	20.84		0.0378363
chr3	35949677	35950076	NM_001003529	16	-		162.393	31.9575	36.155	25.155		227.084	107.758	73.727	76.8		0.975522
chr3	36126435	36126587	NM_200192	13	+		33.7843	7.42484	22.8562	2.9281		135.274	99.706	51.709	31.646		0.627892
chr3	36125990	36126267	NM_131512	8	-		163.162	5.44964	20.2482	0.985612		135.274	99.706	51.709	31.646		0.78758
chr3	36151888	36152040	NM_001080578	14	-		16.2745	26.9542	2.28758	6		22.398	23.209	12.581	12.736		0.931462
chr3	36271750	36271848	NM_001009989	11	-		95.1111	6.27273	32.9495	36.697		510.051	492.133	442.108	389.789		0.337245
chr3	36221916	36221993	NM_199617	14	+		13.4744	7.24359	1.12821	4.34615		153.902	149.914	31.328	31.003		0.848822
chr3	36245859	36245906	NM_001077759	14	-		86.8125	19.25	32.625	20.125		106.445	62.997	83.037	54.802		0.93405
chr3	36363716	36364021	NM_001013263	4	-		155.294	120.614	17.2712	23.8105		71.407	104.205	33.215	56.474		0.736035
chr3	36544448	36544792	NM_198806	14	-		410.661	135.565	422.307	288.31		204.02	270.223	282.954	236.832		-0.291473
chr3	36519160	36519370	NM_001030203	9	-		43.346	26.3033	6.48341	7.33175		86.93	40.261	52.59	38.207		0.7578
chr3	36708975	36709220	NM_001137666	22	+		5.85772	4.77236	13.8293	8.49187		18.184	69.391	253.262	229.628		0.843551
chr3	36732796	36732863	NM_001007771	14	+		6.85294	7.41176	3.76471	1.72059		86.487	258.855	192.998	173.54		0.0376967
chr3	37077233	37077369	NM_200908	11	-		61.1679	15.9416	41.6934	42.7299		61.65	64.655	47.18	61.106		-0.215296
chr3	37143306	37143363	NM_001024223	8	-		20.6897	4.12069	9.60345	3.46552		43.022	14.447	20.508	25.471		0.868098
chr3	37107495	37107606	NM_001002124	8	+		6.38393	21.9196	11.0893	3.57143		65.863	27.709	29.189	5.66		-0.0126536
chr3	37566323	37566383	NM_201504	5	-		72.5574	42.2951	92.8033	70.3443		76.508	94.022	31.957	38.464		-0.830853
chr3	37644338	37644403	NM_199688	6	+		19.6667	95.6818	13.9394	61.4545		70.742	31.262	24.659	21.998		-0.386513
chr3	37780568	37780619	NM_131562	6	-		2.38462	1.86538	0.961538	1.48077		30.381	30.551	49.948	36.663		-0.910419
chr3	37782056	37782095	NM_213377	5	+		273.5	161.05	825.15	2163.62		21.289	31.735	234.516	367.019		0.949997
chr3	39184847	39185043	NM_001015061	11	-		27.8934	7.91371	11.3299	4.85279		30.825	43.814	12.078	11.449		0.2545
chr3	39299601	39300073	NM_001099423	15	-		4.80338	2.52643	1.00211	1.31924		7.54	3.789	4.655	13.122		-0.112918
chr3	39254328	39254448	NM_001020480	12	-		79.6942	217.777	108.008	116.331		53.001	67.023	107.319	82.975		-0.0991605
chr3	39563081	39563189	NM_194377	7	+		2.06422	3.24771	62.1101	55.8349		214.665	191.122	432.924	335.888		0.955397
chr3	39595407	39595460	NM_213496	11	+		32.7593	1.25926	13.5741	6.66667		232.628	86.206	79.892	75.385		0.917707
chr3	40049316	40049520	NM_001045469	8	-		151.522	5.80976	14.0634	7.52195		156.785	130.73	39.254	44.511		0.68767
chr3	40157570	40157649	NM_212638	14	-		10.4625	16.2625	15.3125	8.8875		96.466	71.049	109.961	89.922		-0.169926
chr3	40197089	40197379	NM_001033718	12	-		30.4433	16.5945	28.9038	15.3986		76.951	114.389	60.139	46.183		-0.152299
chr3	40158910	40159129	NM_001089386	3	+		52.6364	28.5045	30.2136	37.1727		60.984	22.499	15.349	14.923		0.891062
chr3	40270759	40270816	NM_201046	12	-		3	4.58621	39.1552	26.4138		63.867	40.024	89.831	76.414		0.870594
chr3	40279063	40279354	NM_200210	6	-		13.0959	17.3185	9.54795	2.93493		147.471	167.202	107.696	91.723		0.960332
chr3	40279609	40279789	NM_001003860	4	+		482.459	317.481	120.343	168.287		147.471	167.202	107.696	91.723		0.744664
chr3	40284203	40284599	NM_131009	8	+		15.1587	3.00504	16.4131	6.04282		98.684	105.153	71.714	47.727		-0.0104563
chr3	40571228	40572163	NM_001076560	5	+		121.997	203.559	121.627	266.006		74.512	177.859	109.206	126.971		0.579809
chr3	40763084	40763310	NM_001001943	18	-		68.6123	6.97797	12.7841	6.39648		51.892	48.55	35.102	26.372		0.634647
chr3	40790892	40791061	NM_201343	10	+		56.5941	208.382	157.624	349.2		335.747	332.273	217.406	187.948		-0.676085
chr3	40831910	40832105	NM_001002729	7	-		83.2296	26.5561	19.5867	14.2245		121.082	73.654	33.341	38.207		0.944518
chr3	40927280	40927744	NM_199902	9	-		40.3226	75.8602	25.4366	28.7269		11.753	19.657	12.33	16.466		0.729087
chr3	41912280	41912807	NM_130971	8	+		0.575758	31.9318	108.756	191.559		6.209	172.649	243.575	572.591		0.967797
chr3	42547236	42547292	NM_001002551	7	-		43.3158	7.45614	4.5614	4.73684		68.302	70.575	21.137	12.221		0.604447
chr3	42515695	42516401	NM_001002663	7	+		2.74682	4.03112	8.96747	5.21216		8.649	5.21	5.033	5.66		-0.678061
chr3	42655051	42655074	NM_001082830	7	+		13.6667	7.75	0.5	0.5		269.218	286.801	47.683	14.665		0.901046
chr3	42783881	42783908	NM_001002184	4	-		13.4286	16.4286	3.53571	19.0357		4.213	9	6.416	7.075		0.293385
chr3	42835457	42835553	NM_213434	23	-		129.381	30.134	11.7629	15.0309		91.144	100.179	33.844	25.729		0.609186
chr3	43240837	43240919	NM_200517	9	-		125.241	8.78313	17.4819	11.6506		88.039	23.446	22.646	21.098		0.997221
chr3	43513104	43513387	NM_201585	18	-		67.6901	39.2711	0.535211	0.683099		169.426	31.972	1.636	3.988		0.913599
chr3	43691806	43692152	NM_213520	9	-		30.8732	1.67435	1.44092	2.24207		64.089	18.946	6.039	2.187		0.964878
chr3	43696479	43696593	NM_001002529	3	-		41.8348	16.1652	28.7304	44.6435		34.151	15.631	34.599	23.284		0.496348
chr3	45318988	45319242	NM_207049	6	-		21.8	22.4824	35.8549	38.6706		5.766	17.289	48.564	40.265		0.932981
chr3	45403210	45403339	NM_131833	7	+		161.908	19.0692	47.0462	17.7846		143.258	98.758	98.26	82.718		0.968268
chr3	45816189	45816235	NM_212996	4	-		124	195.234	181.702	145.809		491.423	1618.26	557.605	679.365		0.700354
chr3	46417612	46418013	NM_001017690	5	-		16.0821	35.7164	19.6741	13.0299		54.775	28.893	61.523	44.125		-0.698897
chr3	46418223	46418459	NM_001002553	3	+		4.28692	4.61181	46.1435	18.5696		54.775	28.893	61.523	44.125		0.646584
chr3	46597765	46598108	NM_001020667	3	+		398.436	19.6017	17.6715	29.5814		96.91	83.601	19.124	21.098		0.673526
chr3	47647357	47647483	NM_199868	21	+		1.00787	0.598425	4.73228	1.88189		87.152	112.258	80.395	67.023		-0.482416
chr3	48316052	48316316	NM_201010	9	-		264.411	9.78491	18.0717	14.7472		122.856	58.26	7.171	7.719		0.887922
chr3	48423522	48423826	NM_001003487	4	-		50.7803	24.7672	34.8361	45.1607		162.329	102.547	73.601	133.789		0.773286
chr3	48510713	48511154	NM_001079978	6	+		7.03394	0.321267	3.91629	1.44118		11.532	2.842	18.243	15.309		0.388969
chr3	49381529	49381779	NM_001110108	6	+		11.9602	5.11554	4.13147	1.76096		25.059	21.788	19.879	8.49		0.807318
chr3	49633698	49634021	NM_212985	4	+		139.198	72.9877	31.1204	39.3611		40.139	76.259	9.436	14.923		0.464666
chr3	49719940	49719968	NM_200702	6	-		7.41379	1.96552	21.7931	104		49.231	4.263	45.544	65.094		0.699789
chr3	49772169	49772246	NM_201307	15	-		20.2564	2.24359	3.55128	1.39744		525.131	240.383	28.56	42.324		0.896857
chr3	50003626	50004108	NM_001080569	2	+		5.46998	4.0911	7.92547	7.52381		14.193	2.842	24.911	13.25		0.848292
chr3	50003389	50004108	NM_001076646	3	+		4.74306	3.47361	7.1375	5.3625		14.193	2.842	24.911	13.25		0.9744
chr3	52183623	52183945	NM_213256	15	+		56.6347	1.08669	4.6904	3.92879		149.024	35.051	22.269	21.741		0.987704
chr3	53298827	53299219	NM_001013514	9	-		4.20865	2.28499	5.02799	3.22392		15.302	12.315	21.262	11.835		0.890324
chr3	53537822	53538254	NM_001001403	25	+		7.92841	19.6328	23.612	48.3072		40.582	32.683	40.134	55.188		0.800713
chr3	53637983	53639096	NM_131447	8	+		25.009	38.6679	115.792	138.495		7.983	45.708	82.534	204.028		0.891012
chr3	53730403	53730531	NM_001003578	3	-		1.89147	2.93798	1.17829	3.15504		9.979	9.947	12.707	9.134		-0.875201
chr3	53754193	53754259	NM_001111281	20	+		52.9403	7.71642	4.64179	4.59701		96.91	159.15	124.178	139.192		-0.805775
chr3	53955061	53955201	NM_001044783	19	+		2.75177	13.7589	18.7234	9.50355		29.716	33.393	31.579	31.26		0.682818
chr3	55405607	55405755	NM_201463	13	+		23.0671	19.6174	38.7919	8.10067		73.181	38.84	95.618	25.214		0.942433
chr3	55433703	55433786	NM_200999	10	+		13.7857	15.8214	37.881	60.3571		12.862	19.42	148.837	150.899		0.912043
chr3	55697850	55698080	NM_001020671	4	-		22.2078	14.5411	12.5368	22.4199		53.223	32.446	27.805	25.471		0.423832
chr3	55930801	55931414	NM_001025534	13	-		5.46906	1.48534	5.44625	4.22313		7.983	6.394	16.23	8.876		0.6097
chr3	56343522	56343714	NM_001020530	8	-		7.40933	2.72021	4.02591	0.787565		153.015	107.521	82.534	86.448		0.82097
chr3	57615699	57615748	NM_001017729	7	+		6.54	0.48	0.42	0.54		32.599	3.316	2.894	1.672		0.998252
chr3	58578977	58579057	NM_214743	4	-		8.92593	4.38272	1.97531	14.5926		22.176	2.368	14.217	17.881		0.523792
chr3	59032906	59033053	NM_200312	3	-		20.0338	12.9324	18.7568	28.4932		169.647	176.912	84.924	142.151		-0.216177
chr3	59035069	59035179	NM_001002657	14	+		4.42342	2.47748	19.1171	66.9459		31.047	7.105	23.15	56.217		0.88228
chr3	59687863	59688061	NM_001045319	12	-		75.3417	24.0101	114.759	20.0553		120.416	216.7	290.503	120.153		0.557949
chr3	59687863	59688047	NM_001080591	11	-		80.5297	25.6216	123.297	21.4703		120.416	216.7	290.503	120.153		0.560082
chr3	60271311	60271409	NM_001045471	5	+		45.9091	16.5859	6.32323	9.41414		49.896	58.023	95.241	78.086		-0.821974
chr3	60387376	60387892	NM_205564	5	-		14.5977	11.2476	4.37718	8.7176		28.385	12.789	2.139	11.707		0.954365
chr3	60305891	60306017	NM_213461	6	+		16.5276	34.4961	31.8819	74.4724		60.984	95.916	252.382	317.492		0.81273
chr3	61205111	61205486	NM_170761	9	-		95.492	22.3351	23.5239	16.9441		77.395	41.919	17.488	13.636		0.916682
chr3	61219894	61220027	NM_001030254	13	+		16.5896	18.5896	1.13433	3.02985		24.616	27.709	8.178	7.461		0.993205
chr3	61284670	61284868	NM_001020768	3	+		91.1307	31.1859	9.26131	2.59799		29.716	27.709	10.317	11.192		0.834066
chr3	61450789	61451439	NM_001009906	3	-		71.2273	29.3671	4.46544	6.64363		14.414	14.21	2.39	2.058		0.839476
chr3	61536569	61536796	NM_213338	4	+		48.5789	71.2544	104.018	161.272		45.239	29.13	33.089	35.248		-0.337754
chr3	61695292	61695312	NM_213266	31	-		19.0476	18.7619	5.66667	3.33333		26.611	66.076	96.373	99.956		-0.885334
chr3	62000466	62000954	NM_001200039	3	+		60.8425	45.5562	34.4601	69.4397		19.071	27.946	27.05	25.085		-0.563795
chr3	62748712	62749004	NM_001105129	18	-		31.1195	4.21843	11.6997	16.4232		15.08	12.315	27.427	92.495		0.0186907
chr3	62856745	62856917	NM_001007402	20	-		7.54335	12.1445	62.7514	64.711		119.086	91.416	194.382	153.343		0.863916
chr3	62950608	62950697	NM_001114921	3	+		2.64444	13.2778	10.2	9.55556		10.645	5.921	3.774	1.286		-0.660759
chr3	63183911	63184452	NM_131644	3	-		12.7454	4.86531	36.9834	62.2435		14.193	9.947	101.783	106.517		0.926414
chr4	15774851	15775125	NM_212644	22	-		13.4655	10.3745	21.1964	15.4		40.139	59.918	40.009	78.601		-0.32933
chr4	14671235	14671315	NM_001030134	18	+		28.1975	4.1358	5.4321	3.7284		15.523	20.131	24.911	33.833		-0.704185
chr4	11541688	11541729	NM_001007341	12	-		13.9524	6.30952	2.2381	7.69048		34.595	36.946	16.859	20.326		0.608443
chr4	392636	392663	NM_001025499	10	+		2.89286	1.92857	2.89286	7.46429		10.866	5.447	33.215	38.593		0.752739
chr4	1579563	1579703	NM_001045098	9	-		55.3546	0.539007	1.3617	1.75177		31.934	3.552	6.165	10.549		0.978455
chr4	2353055	2353149	NM_001128382	17	+		18.0737	3.61053	0.610526	1.87368		15.523	27.709	16.733	16.852		-0.300743
chr4	2508653	2508699	NM_001045144	22	-		3.91489	1.55319	4.95745	3.10638		26.833	35.761	10.443	10.549		-0.696115
chr4	2241238	2241310	NM_201318	15	-		269.781	206.301	177.89	213.027		267.666	240.146	315.414	410.758		-0.242752
chr4	4624911	4625230	NM_001080651	12	-		9.35313	6.69375	7.12188	7.84375		14.193	8.763	39.254	32.804		-0.164045
chr4	7489032	7489114	NM_001025506	8	-		49.3494	7.87952	3.08434	5.68675		63.424	103.495	31.328	42.195		0.149818
chr4	8266758	8267028	NM_001017706	7	-		37.5387	37.5793	10.6531	10.6531		35.482	124.81	44.035	26.501		0.572773
chr4	8973769	8973961	NM_001045158	40	+		44.3005	8.09845	11.9845	15.5648		6.431	19.183	13.21	17.495		-0.905709
chr4	11166364	11166560	NM_205744	19	-		12.3452	2.62437	6.58883	4.19289		60.541	27.472	32.082	32.032		0.958459
chr4	12985630	12985722	NM_001045268	4	-		0.322581	3.19355	13.6129	9.70968		11.31	34.814	138.521	94.939		0.998583
chr4	14168993	14169038	NM_131680	11	-		26.8043	13.6957	10.6957	38.3913		68.746	99.469	25.037	65.865		0.169448
chr4	18007461	18007522	NM_199533	8	-		1.87097	2.58065	24.3065	6.45161		83.826	57.787	379.453	246.738		0.918244
chr4	18628286	18628464	NM_182865	24	-		44.2682	44.5754	99.6369	196.296		74.955	108.468	243.323	197.982		0.666774
chr4	18628286	18628364	NM_001245080	15	-		45.3165	13.4304	130.354	159.392		74.955	108.468	243.323	197.982		0.849748
chr4	20401780	20402515	NM_001006015	6	-		45.6712	29.4144	7.96875	9.7663		59.876	42.629	44.664	47.083		0.713844
chr4	20519407	20519666	NM_001003870	26	-		18.6385	5.50769	11.7846	12.7808		59.21	107.521	81.527	88.635		-0.972938
chr4	21233537	21233608	NM_001103140	3	+		4.31944	23.4444	39.2361	22.2222		37.699	19.183	110.213	38.464		0.700499
chr4	21233547	21233608	NM_001037107	3	+		5.01613	27.2258	45.5645	25.8065		37.699	19.183	110.213	38.464		0.700499
chr4	24255309	24255475	NM_001042744	7	-		79.8024	8.2515	20.515	12.8443		70.964	53.287	45.796	59.819		0.780856
chr4	27193708	27193811	NM_214799	14	-		31.1154	65.2019	2.97115	6.83654		87.596	11.605	22.898	12.092		0.0232465
chr4	27663785	27663973	NM_001020599	11	-		23.2275	7.47619	3.65079	1.06878		27.055	18.473	14.217	7.847		0.950305
chr4	60301383	60301556	NM_001128288	8	-		3.27011	2.31034	2.33333	5.52299		2.661	5.21	5.536	7.204		0.494794
chr4	68084	68369	NM_001044840	17	+		2.72727	3.49301	2.15734	1.75524		7.096	4.5	1.51	3.345		0.47748
chr4	18946	19087	NM_001044754	6	+		784.746	959.81	322.507	513.077		3.326	243.698	194.004	162.991		-0.078306
chr4	101634	101684	NM_201060	5	+		154.706	218.451	863.373	2350.51		24.394	30.788	128.078	295.751		0.997832
chr4	40918	41003	NM_001159988	7	-		4.94186	10.2674	16.4884	30.8023		39.252	11.368	56.868	73.97		0.772375
chr4	467218	467248	NM_001004113	16	-		4.09677	1.93548	3.19355	0.580645		25.281	26.525	11.701	16.595		0.169956
chr4	762822	762954	NM_001037388	9	-		6.49624	0.278195	7.37594	5.26316		11.088	6.868	28.308	34.862		0.567215
chr4	734205	734607	NM_001083580	6	-		4.47146	16.7122	13.8635	23.6501		37.256	4.737	15.475	13.636		-0.791701
chr4	933041	933103	NM_212972	6	-		16.5873	22.9206	92.3968	51.127		94.914	102.547	206.586	136.105		0.995863
chr4	1542990	1543402	NM_001077763	21	-		78.2034	15.9685	16.3075	23.6368		3.105	39.551	35.354	71.268		-0.745305
chr4	1661832	1662151	NM_001004648	5	-		64.8219	17.475	31.1844	26.4312		40.582	10.657	39.128	37.049		0.634481
chr4	1616541	1616628	NM_213423	4	+		25.6818	42.3182	14.625	41.3068		38.365	26.762	38.373	50.814		-0.00799041
chr4	1678812	1678919	NM_200342	4	-		90.0278	54.9537	93.5185	133.574		106.889	61.813	82.408	60.977		-0.0758505
chr4	1581953	1581982	NM_199955	6	+		22.4667	16.2333	2.86667	2.93333		26.168	48.55	19.124	28.687		0.408229
chr4	1644952	1645108	NM_212811	17	-		187.662	20.4968	40.8089	24.7771		84.935	45.471	125.813	51.843		0.249731
chr4	1620083	1620189	NM_001012496	13	+		10.1028	2.57944	13.5047	7.79439		14.193	14.21	29.692	32.933		0.469387
chr4	1699655	1699824	NM_200292	16	-		18.5941	45.1706	40.2941	45.3471		51.005	53.05	80.143	56.217		0.277696
chr4	1920153	1920222	NM_001017993	10	-		132.1	118.214	173.529	161.4		75.399	94.022	167.961	156.688		0.920004
chr4	1920685	1920898	NM_001002752	7	+		30.5514	103.799	39.2103	52.715		75.399	94.022	167.961	156.688		-0.231595
chr4	2210469	2211508	NM_001006011	1	-		16.2952	9.50096	11.8183	15.5019		3.326	3.316	9.436	17.11		0.347775
chr4	2508956	2509255	NM_001003490	6	+		20.3967	33.98	11.76	12.7133		26.833	35.761	10.443	10.549		0.961492
chr4	2815786	2816337	NM_213494	8	-		256.384	274.554	44.8134	102.156		16.632	46.182	5.033	32.418		0.568878
chr4	3326569	3326667	NM_200436	6	+		7.72727	3.13131	7.0303	1.64646		7.983	10.657	16.356	10.806		0.132843
chr4	3951941	3952250	NM_201059	11	+		36.2452	14.1032	12.3452	9.24194		161.886	96.153	39.631	48.627		0.933272
chr4	4128595	4128774	NM_213428	8	-		235.656	22.0333	46.5444	33.6722		188.719	157.966	56.49	70.368		0.656276
chr4	4380166	4380472	NR_023339	2	-		13.9055	10.6221	1.1987	0.403909		24.837	19.42	7.423	2.573		0.989318
chr4	4407718	4407900	NM_001130792	9	-		9.68852	4.07104	1.89071	1.65027		8.87	6.631	3.271	7.719		0.638232
chr4	4629488	4629533	NM_001017806	7	-		15.4783	6.30435	22.8696	16.1087		133.5	91.416	99.644	76.157		0.123829
chr4	4965123	4965440	NM_201340	17	-		46.6164	19.1132	19.5283	31.4434		81.386	80.049	56.993	63.55		0.442312
chr4	5069734	5069990	NM_001044338	10	+		22.4747	2.00778	6.88716	1.94942		51.67	14.21	11.826	9.52		0.966741
chr4	5192149	5192275	NM_001025503	4	+		480.803	682.071	69.7244	148.047		275.428	353.588	168.59	261.017		0.897999
chr4	5207249	5207338	NM_213421	6	+		66.0222	25.9222	170.656	107.878		60.763	64.418	178.026	109.218		0.95225
chr4	5128345	5128460	NM_001025484	5	+		5.68966	2.92241	6.18103	4.10345		48.344	2.842	21.64	19.811		0.721854
chr4	5120292	5120515	NM_173254	9	-		4.37946	17.7188	28.3125	73.4911		75.621	13.973	87.44	145.882		0.775572
chr4	5515944	5516122	NM_001030114	6	+		9.18994	65.419	23.0838	70.1844		27.498	20.367	13.21	18.782		-0.266737
chr4	5704641	5704766	NM_201097	9	-		12.5635	18.4444	15.9127	13.5556		61.428	31.498	23.653	11.707		-0.31023
chr4	5648594	5648716	NM_199951	12	-		50.7724	3.80488	13.3577	11.2276		115.981	99.469	63.536	213.291		-0.0573614
chr4	5708690	5708996	NM_199920	5	+		3.68404	1.26384	6.89251	3.99023		3.77	9.473	16.985	16.209		0.553819
chr4	5668473	5668522	NM_001007053	13	-		14.78	3.04	5.98	4.42		48.566	15.631	20.256	15.694		0.99232
chr4	6197978	6198164	NM_001076555	12	-		4.1123	7.96257	13.9198	23.4492		8.427	6.394	22.395	23.799		0.873769
chr4	6743290	6743447	NM_213286	19	-		32.9304	6.31646	20.4051	44.3924		54.11	38.13	35.857	41.295		0.453003
chr4	7049767	7049883	NM_001024813	18	-		73.4872	31.9145	10.6838	12.2821		149.911	81.47	24.03	14.022		0.984143
chr4	7056042	7056157	NM_001002086	9	-		11.7759	13.5431	2.96552	3.93966		181.844	125.757	55.61	25.729		0.861872
chr4	8082592	8082726	NM_001007343	15	+		48.0667	10.6074	13.4	19.4889		17.297	14.92	13.462	10.42		0.599973
chr4	8125521	8125654	NM_001201412	4	-		10.2463	11.6269	10.8657	3.41045		116.646	145.414	116.126	30.874		0.986838
chr4	8248745	8248774	NM_001017565	7	+		59.9667	18.3	27.1	30.3		47.457	73.417	145.566	82.589		-0.531716
chr4	8421706	8422167	NM_001030090	3	-		86.8636	36.8247	11.8788	11.8225		12.419	42.629	17.488	20.197		-0.227144
chr4	8550334	8550507	NM_001142563	14	+		31.546	8.31609	11.5517	38.477		47.235	39.551	19.753	59.047		0.815212
chr4	8654721	8654840	NM_001045076	14	+		9.625	16.2417	23.45	23.0667		65.641	68.207	74.985	54.931		-0.048685
chr4	8729558	8729616	NM_001002665	17	-		13.4407	18.6949	3.50847	3.62712		11.532	11.842	10.191	9.906		0.979811
chr4	8671633	8671870	NM_001045101	14	-		6.26891	1.56723	6.03782	12.2899		4.435	2.605	4.026	4.76		0.89122
chr4	8884305	8884755	NM_001115086	8	-		11.3614	7.18404	22.7073	12.3149		28.385	23.446	25.918	21.226		0.251399
chr4	8898744	8898876	NM_198210	18	+		29.7744	50.1429	8.06767	13.4812		1402.2	599.417	137.64	137.134		0.502687
chr4	8842848	8843165	NM_001007407	16	-		14.4245	8.6195	5.51887	2.77044		26.611	22.736	15.978	13.893		0.970517
chr4	8843142	8843368	NM_001045229	17	-		5.46696	2.40088	4.88106	0.876652		26.611	22.736	15.978	13.893		0.536283
chr4	8929519	8929712	NM_001045149	20	-		7.40722	51.3247	8.56701	11.2577		117.534	170.518	39.631	27.787		0.768443
chr4	9668647	9668811	NM_200937	12	+		18.4121	28.8485	25.7939	14.0606		53.223	65.839	32.837	27.144		0.572734
chr4	10088929	10089094	NM_001130603	12	-		13.1867	10.3675	11.5723	23.1747		14.636	4.026	19.124	45.282		0.958416
chr4	10117793	10118047	NM_001045057	12	-		15.2157	2.25882	1.96471	2.00392		48.344	40.261	73.475	6.432		0.147362
chr4	10118246	10118455	NM_001045054	4	+		6.2	57.0095	22.4619	1.57619		48.344	40.261	73.475	6.432		0.27804
chr4	10528788	10528926	NM_199655	12	+		11.9137	76.446	157.612	171.863		179.183	151.335	231.497	210.846		0.721455
chr4	10760508	10760608	NM_212694	18	+		43.4554	2.52475	0.742574	0.70297		23.95	12.552	19.124	15.437		0.818841
chr4	11104765	11104869	NM_001044967	7	-		41.8952	21.619	6	13.6762		113.542	143.045	45.67	47.598		0.664477
chr4	11170406	11170563	NM_001002306	4	-		1.90506	3.01899	12.981	2.68987		204.907	42.866	136.759	70.754		0.124072
chr4	11356808	11356895	NM_152978	8	+		31.4659	0.579545	3.28409	0.909091		190.271	98.995	15.349	18.782		0.857364
chr4	11350395	11350591	NM_201169	13	-		5.71574	5.4467	8.88832	10.2234		99.349	86.443	21.766	26.243		-0.94586
chr4	12043227	12043455	NM_213138	7	-		80.3362	19.4803	14.9782	30.0393		149.024	71.049	53.219	43.224		0.921212
chr4	11993239	11994540	NM_001044864	13	-		329.066	121.002	38.9739	55.4309		51.449	70.812	14.469	23.799		0.53586
chr4	12476553	12476841	NM_213485	15	+		35.1834	29.1107	48.8097	63.2284		39.03	66.076	79.64	98.927		0.813997
chr4	12516960	12517337	NM_001044833	3	+		5.36508	7.78571	6.89153	7.10053		14.414	61.813	33.844	64.965		0.887249
chr4	12651212	12651495	NM_201087	23	+		274.384	99.0493	41.3275	47.4331		81.165	138.309	35.354	41.552		0.332763
chr4	12679185	12679345	NM_212875	9	-		96.2174	15.1553	5.91925	2.37267		97.131	57.55	6.794	2.316		0.891076
chr4	12631893	12632040	NM_001044820	13	-		0.506757	0.513514	1.52027	0.114865		10.201	19.657	83.163	51.972		0.637932
chr4	12633049	12633134	NM_001002151	7	+		12.7326	10.6628	14.4302	10.8837		10.201	19.657	83.163	51.972		0.546442
chr4	12995914	12996014	NM_001017589	8	-		12.4158	2.50495	4.9802	1.43564		155.011	109.179	40.134	28.816		0.748902
chr4	12996271	12996401	NM_001080080	11	+		19.1985	12.7405	35.2366	13.1832		155.011	109.179	40.134	28.816		-0.282839
chr4	13272174	13272247	NM_001002304	9	-		16.5	21.6892	3.63514	4.74324		113.098	116.757	33.089	14.279		0.958574
chr4	13792409	13792821	NM_001030151	8	+		22.9177	4.13559	30.1065	15.1332		7.54	5.21	35.102	20.326		0.711664
chr4	13792484	13792821	NM_001040252	8	+		27.6391	5.05325	35.7071	18.4201		7.54	5.21	35.102	20.326		0.705153
chr4	13992339	13992464	NM_200966	12	+		11.1349	42.8968	90.2937	154.325		40.582	27.709	49.948	41.938		0.385773
chr4	14019349	14019421	NM_201473	19	-		18.4658	0.410959	1.50685	2.49315		17.963	17.999	17.111	23.284		-0.190124
chr4	14068992	14069285	NM_200261	9	-		184.98	20.9014	4.15986	8.35374		40.361	7.342	2.642	7.204		0.996103
chr4	14071614	14071784	NM_001077378	10	+		63.3567	10.9298	17.3158	12.7427		61.871	62.76	42.147	45.282		0.469436
chr4	14076732	14076904	NM_201489	7	+		121.659	173.838	49.2312	110.96		35.26	56.129	89.705	75.385		-0.658898
chr4	14668741	14668903	NM_214804	9	-		3.53374	16.8405	9.00613	42.4724		62.758	44.998	13.21	53.001		0.202561
chr4	15049000	15049072	NM_130994	24	+		16.2603	33.6575	48.1233	45.7671		168.982	157.492	137.892	121.825		-0.891973
chr4	15189764	15189811	NM_001044757	21	-		69.6458	13.0208	17.0625	9.8125		146.584	260.513	105.683	92.752		-0.041389
chr4	15383875	15384072	NM_001123290	4	+		0.929293	3.29293	6.15152	1.05556		7.54	21.552	13.085	2.187		0.55947
chr4	15794143	15794254	NM_213020	10	+		15.0714	3.40179	8.4375	15.7143		21.954	14.92	41.896	74.227		0.581722
chr4	15904020	15904088	NM_131247	8	-		156.29	58.2174	88.5507	217.783		459.49	380.349	100.273	277.098		0.141222
chr4	15944225	15944520	NM_180968	15	-		185.331	54.5	64.3108	91.6284		15.302	29.13	39.002	39.751		-0.790127
chr4	16421204	16421297	NM_001040380	11	-		37.1489	12.9574	5	2.74468		87.374	70.575	20.759	17.11		0.885285
chr4	16592513	16592793	NM_001045096	16	+		6.92883	3.07473	12.3488	3.40925		3.326	3.552	6.794	6.689		0.386471
chr4	16607278	16607520	NM_001017908	12	+		1.48148	1.03704	6.71605	1.87654		37.921	9.71	19.501	22.255		-0.100279
chr4	16739979	16740111	NM_001044768	21	+		5.40602	2.64662	12.6165	6.52632		29.938	48.787	30.069	40.909		-0.696676
chr4	16710914	16711046	NM_001044758	14	+		34.391	17.5338	15.0226	10.1429		23.507	44.524	13.21	12.993		0.22044
chr4	16709244	16710376	NM_001045136	3	-		1.55428	2.06796	0.618711	0.323036		23.507	44.524	13.21	12.993		0.928707
chr4	16724161	16724237	NM_200173	7	+		20.7143	1.4026	19.7403	13.6494		64.754	20.841	43.028	35.763		0.876496
chr4	16911900	16912054	NM_001045243	11	+		1.03226	1.89032	3.39355	2.89032		139.266	68.207	59.887	102.915		-0.688691
chr4	17510171	17510264	NM_001044991	19	+		15.5851	6.5	14.9574	11.0851		36.369	36.709	28.056	20.326		-0.112326
chr4	17484443	17484943	NM_001006066	2	-		20.3313	4.92615	1.2515	3.35928		9.314	10.184	3.02	4.117		0.617145
chr4	17580473	17580735	NM_001045003	13	-		2.71863	3.61977	7.51331	2.76806		43.687	13.262	16.733	19.425		-0.429418
chr4	18985877	18985940	NM_001044950	4	+		109.562	68.8125	23.3594	22.0312		161.664	110.363	2.013	51.329		0.949525
chr4	18985316	18985578	NM_001002526	2	-		5.58555	6.41825	26.5095	42.616		161.664	110.363	2.013	51.329		-0.742135
chr4	18997673	18997800	NM_001003599	3	+		8.01562	4.5	2.42969	2.375		133.5	71.76	51.835	36.921		0.988387
chr4	19015811	19016003	NM_200065	20	-		170.632	0.782383	9.51813	2.05699		81.83	53.76	15.727	12.478		0.808563
chr4	19043209	19043251	NM_212725	10	-		28.0465	9.60465	1.23256	0.511628		202.468	274.723	78.256	30.617		0.616912
chr4	19016892	19017270	NM_001025509	24	+		18.8047	4.51979	5.64644	7.70449		81.83	53.76	38.625	50.428		0.91274
chr4	19171400	19171594	NM_200982	14	-		51.2308	36.4	3.04103	0.528205		85.378	75.549	6.039	5.274		0.987929
chr4	19250238	19250439	NM_001045155	10	-		8.9505	1.18317	6.52475	5.00495		9.757	2.605	31.831	16.209		0.428006
chr4	19421743	19421996	NM_199883	17	+		18.0079	2.88583	10.8307	5.62205		29.716	41.682	19.249	12.221		-0.108597
chr4	20588293	20588321	NM_001076732	6	-		2.89655	1.2069	7.44828	5.51724		78.947	178.57	688.954	1825.32		0.574971
chr4	21299285	21299380	NM_213198	15	-		1.82292	0.916667	9.28125	13.1667		14.636	8.526	11.826	11.063		-0.00131659
chr4	21415837	21416043	NM_200791	4	+		25.8744	13.5121	97.5072	227.498		31.047	11.842	46.551	97.254		0.985467
chr4	21415837	21416043	NM_001167826	3	+		25.8744	13.5121	97.5072	227.498		31.047	11.842	46.551	97.254		0.985467
chr4	21685147	21685243	NM_001030167	26	-		14.2165	8.98969	8.4433	20.5258		25.281	39.077	65.675	85.934		0.463547
chr4	22053246	22053849	NM_001030179	5	+		100.026	10.4702	21.0182	14.7897		35.925	41.919	18.746	14.665		0.341805
chr4	24358469	24358588	NM_200197	9	-		12.875	0.958333	19.4417	9.75		2.218	4.5	38.751	31.26		0.62179
chr4	24268704	24269005	NM_001030086	11	+		47.394	2.44702	9.17881	0.599338		270.327	95.443	142.169	279.156		0.458972
chr4	24268616	24268685	NM_200041	9	-		0.214286	0.0571429	1.22857	5.37143		270.327	95.443	142.169	279.156		0.56009
chr4	24883737	24883961	NM_001044813	4	-		18.7778	51.4178	47.4311	66.2978		9.757	55.181	61.145	74.099		0.975942
chr4	24923749	24923916	NM_001033103	4	-		10.1488	3.27976	17.7143	33.4464		20.846	5.684	36.486	49.399		0.968271
chr4	25122870	25122903	NM_200257	7	-		44.2353	17.2647	25.8824	9.23529		192.267	231.62	106.941	78.215		0.397106
chr4	26395321	26395615	NM_200523	10	-		38.2915	5.84068	6.69492	7.50847		2.439	26.051	28.56	21.869		-0.977701
chr4	27195483	27195634	NM_001105586	13	+		25.5921	3.83553	2.05921	3.61184		39.917	13.499	18.62	19.039		0.965987
chr4	27684116	27684344	NM_001007373	4	-		0.663755	18.4934	23.2314	20.4629		35.26	3.316	17.362	15.694		-0.784302
chr4	29632326	29632402	NM_131734	7	+		70.7013	9.50649	7.20779	11.4416		499.85	101.6	30.447	109.99		0.993038
chr4	29641584	29641805	NM_001080560	9	+		11.8514	144.541	23.5405	37.1306		135.496	65.602	44.79	41.166		-0.237419
chr4	58481807	58482106	NM_001109732	3	-		7.71667	0.76	0.92	2.76333		223.535	42.866	20.13	5.66		0.913689
chr4	59479555	59480047	NM_001002870	18	-		19.5152	33.9736	29.0385	22.9757		20.846	63.707	49.319	3.087		0.877202
chr4	60246126	60246233	NM_201580	9	+		234.019	183.241	118.63	110.5		55.44	127.888	73.978	71.14		-0.00556944
chr4	61263012	61263161	NM_001110527	3	-		5.44667	2.89333	4.68	0.46		28.607	14.92	16.482	16.466		0.613653
chr4	61271065	61271185	NM_001082919	3	-		4.3719	4.19008	3.2314	0.859504		106.002	63.944	29.818	13.636		0.829767
chr4	61965011	61965073	NM_001014293	5	+		0.47619	2.34921	0.253968	1.2381		7.54	7.579	4.278	3.087		0.313172
chr4	62004250	62004541	NM_201019	10	+		0.527397	0.0924658	0.106164	0.815068		2.883	4.5	5.41	5.532		-0.0313227
chr4	62017330	62017364	NM_207069	12	+		38.3143	18.4	28.5429	42.8286		40.139	47.129	20.759	48.884		0.158936
chr4	62041798	62041946	NM_205597	16	+		40.4631	7.52349	4.77181	3.5302		83.826	126.941	18.243	10.549		0.373914
chr4	62050284	62050539	NM_001245036	5	+		42.7422	3.21094	39.1406	31.7812		29.716	24.157	167.08	51.2		0.433279
chr4	62050278	62050539	NM_001002109	10	+		41.8092	3.1374	38.416	31.1374		29.716	24.157	167.08	51.2		0.43603
chr5	2074647	2074953	NM_001100057	12	+		36.2704	8.47231	8.08469	6.04235		9.314	22.973	35.731	20.454		-0.762004
chr5	26212980	26213420	NM_001122747	20	+		175.753	9.45578	8.78912	7.26984		74.955	63.471	29.944	15.309		0.699675
chr5	70263988	70264186	NM_001083818	14	-		124.638	283.884	17.3417	5.76884		137.936	148.493	24.156	27.015		0.892264
chr5	1436768	1437160	NM_212768	6	+		14.2163	2.09415	7.47837	5.96947		25.059	3.316	20.759	21.612		0.818439
chr5	1978760	1978904	NM_001003865	9	-		68.4	23.2276	70.8414	31.3103		87.596	133.099	144.811	59.562		0.208716
chr5	3944710	3945032	NM_001017858	6	-		35.3777	29.6223	68.5077	164.92		240.833	94.495	183.31	305.399		0.759282
chr5	4456470	4456938	NM_001077274	5	-		3.69083	4.76546	48.1514	24.6674		19.959	33.63	896.924	427.353		0.999958
chr5	12897042	12897177	NM_001128707	17	-		182.926	28.375	2.75735	5.60294		99.349	130.02	15.098	5.403		0.515227
chr5	12993840	12994300	NM_001114578	11	-		13.0174	25.1692	8.77007	11.5141		3.992	14.21	6.794	10.935		0.713425
chr5	14111126	14111266	NM_200991	20	+		61.2128	42.8723	11.3688	7.5461		78.06	95.679	48.438	24.571		0.833813
chr5	14555832	14556156	NM_001082797	4	-		5.78462	5.70462	0.424615	0.406154		181.179	188.754	138.646	156.044		0.939655
chr5	14288709	14288962	NM_001003780	5	-		7.51575	2.93307	0.566929	0.598425		19.515	28.656	12.707	18.267		0.293891
chr5	19701183	19701571	NM_178304	11	+		7.30334	5.08483	14.108	5.0437		17.519	19.183	29.189	20.84		0.879005
chr5	20709066	20709572	NM_001007323	6	+		18.2229	28.3688	38.2446	33.3925		49.453	27.709	32.586	27.53		-0.769469
chr5	22927596	22927772	NM_201186	13	+		25.2938	6.09605	16.2373	16.096		41.913	37.182	14.217	25.343		0.120669
chr5	22102871	22102996	NM_201295	11	+		157.008	39.8651	35.6587	17.0159		60.984	63.707	67.688	50.3		0.171329
chr5	25697836	25698095	NM_212786	22	-		71.2962	62.2038	12.0769	5.62308		88.926	85.259	24.408	18.01		0.99743
chr5	25822816	25822935	NM_001128328	7	-		17.6	15.425	27.0917	10.325		60.541	20.604	45.419	19.168		0.580071
chr5	27782861	27783036	NM_131775	6	+		36.2273	27.9034	38.6818	21.0682		138.601	75.549	137.892	94.939		0.812178
chr5	28440050	28440314	NM_001123231	10	+		1.1283	3.04528	3.78491	1.0566		15.523	8.289	5.787	13.25		-0.973374
chr5	29638466	29639219	NM_001166628	13	-		33.878	2.89788	8.77454	9.17109		53.444	3.079	43.783	64.579		0.487891
chr5	31198146	31198368	NM_001020786	14	-		37.2646	14.4978	21.6951	18.3408		82.273	99.469	30.447	26.629		0.160195
chr5	31198146	31198417	NM_200168	13	-		32.3676	12.0846	18.3272	15.3456		82.273	99.469	30.447	26.629		0.17013
chr5	32235648	32236229	NM_213424	9	+		58.1804	2.83505	2.93986	2.39519		72.959	43.577	7.8	5.66		0.842173
chr5	33327348	33327497	NM_201119	11	-		157.7	21.0933	16.4867	32.5533		57.214	45.471	19.375	37.692		0.755142
chr5	34107577	34107694	NM_001080046	18	-		34.1356	2.69492	5.78814	2.94068		159.89	86.68	41.77	34.476		0.895753
chr5	34873539	34873657	NM_001110286	10	-		20.6303	14.5462	8.7395	8.65546		133.722	56.129	39.254	49.785		0.924521
chr5	36167314	36167453	NM_198870	6	+		307.443	33.5357	38.7929	21.1929		361.249	471.055	101.783	111.534		0.370848
chr5	37361132	37361639	NM_001002709	8	-		4.67126	3.38583	1.83858	3.26378		77.838	29.841	50.703	33.576		0.472724
chr5	38266877	38266961	NM_001077271	4	+		31.1059	5.61176	11.6235	7.27059		73.847	87.39	79.388	43.739		0.11131
chr5	38941130	38941207	NM_001100038	19	-		139.551	14.0641	20.8333	27.3077		6.431	43.577	29.692	37.692		-0.946978
chr5	39984689	39985212	NM_001089579	4	-		22.4389	9.85305	5.12595	3.62786		85.6	4.263	5.662	55.703		0.6289
chr5	40771244	40771429	NM_200710	7	-		63.3065	41.2581	7.96774	7.03763		100.901	112.258	15.852	11.835		0.912421
chr5	43115175	43115310	NM_205639	14	+		45.875	4.30882	7.875	4.42647		78.282	25.814	13.21	14.794		0.970634
chr5	43614765	43615093	NM_200276	48	-		10.8207	8.68997	18.6778	9.0304		16.189	41.682	11.197	40.909		-0.808629
chr5	44569148	44569382	NM_001045852	9	-		16.3745	65.4426	67.9532	29.4596		111.768	123.625	53.597	27.272		0.0545138
chr5	46274473	46274535	NM_001099990	25	+		59.8571	5.79365	4.84127	7.88889		18.184	11.131	6.165	18.01		0.589739
chr5	50463201	50463252	NM_001002104	3	-		113.596	79.7692	38.5	19.6731		107.776	58.023	24.156	15.694		0.980905
chr5	52555979	52556167	NM_001161511	26	+		5.8836	2.18519	14.7831	2.60847		140.153	62.523	82.408	72.683		0.150514
chr5	54816674	54816795	NM_213514	12	-		54.5082	21.3443	22.1721	18.8934		47.235	60.392	85.931	131.602		-0.661951
chr5	56473986	56474091	NM_001130074	7	+		27.5472	5.83019	4.17925	3.10377		51.227	41.682	24.659	20.197		0.827052
chr5	57161148	57161319	NM_200952	7	-		25.8663	44.7965	23.9767	24.6977		64.976	4.263	46.803	60.591		-0.937422
chr5	57323166	57323441	NM_199566	23	-		54.9167	24.0761	36.1268	32.8768		120.638	121.968	109.709	69.725		0.21206
chr5	58333376	58333931	NM_001007340	6	-		22.7374	21.1223	6.36331	9.22662		35.038	22.736	17.74	12.35		0.822871
chr5	60156222	60156418	NM_001076705	10	+		0.385787	3.32487	8.86802	3.75127		23.95	66.786	60.516	29.073		0.614068
chr5	63844590	63844619	NM_200673	9	-		15.4333	2.86667	1.26667	1.6		51.227	36.946	23.527	19.811		0.900482
chr5	63571500	63571581	NM_001160291	3	-		6.90244	8.23171	22.122	11.9146		75.621	20.131	67.562	41.166		0.303689
chr5	64494217	64494405	NM_001082803	12	-		3.61376	1.60847	3.74603	1.20635		11.532	7.342	34.347	33.447		0.0361771
chr5	64720351	64720451	NM_199919	22	+		34.3861	15.1881	19.5347	31.2871		22.62	48.787	38.247	24.7		-0.984538
chr5	68031691	68031750	NM_212702	11	-		66.4667	56.0333	40.4667	28.3		95.801	126.467	137.766	150.77		-0.952667
chr5	69030568	69031209	NM_131087	24	+		8.30685	3.02181	5.94237	10.5717		93.362	33.156	31.705	32.547		0.271767
chr5	70916575	70916676	NM_201125	8	-		264.039	179.931	77.9608	54.049		291.173	337.957	149.844	140.35		0.847773
chr5	72674719	72674818	NM_001020758	6	+		23.71	71.29	9.87	21.78		29.494	23.92	11.952	7.976		0.456923
chr5	72486658	72486869	NM_213301	13	-		23.9858	2.86792	1.75943	3.22642		35.704	30.788	8.807	22.127		0.676582
chr5	250380	250505	NM_214750	9	-		13.3254	40.8571	67.2143	85.4127		167.873	82.18	232.629	196.567		0.479329
chr5	790734	790841	NM_001045284	5	+		45.5093	61.787	26.287	22		31.712	61.813	26.043	17.11		0.942947
chr5	1429157	1429219	NM_213037	7	-		106.81	53.127	8.61905	8.31746		321.997	301.011	64.416	109.99		0.902663
chr5	1539961	1540184	NM_001003567	5	-		49.1652	17.2455	31.9688	6.50893		61.871	49.261	53.345	27.916		0.914245
chr5	1806388	1806436	NM_001127334	27	-		109.224	81.3878	9.5102	10.3061		108.441	120.073	99.393	88.764		0.770794
chr5	1813137	1813244	NM_001002425	10	+		9.55556	0.703704	9.05556	7.13889		55.219	20.604	23.401	26.115		0.567493
chr5	1835337	1835476	NM_200293	3	+		8.02857	3.7	17.0786	15.6929		104.45	38.84	121.41	55.96		0.492195
chr5	2112166	2112372	NM_001020688	3	+		114.203	95.372	30.5266	37.8164		83.161	89.285	50.074	48.756		0.949757
chr5	2521097	2521200	NM_213058	9	-		50.2019	216.26	108.375	62.8462		1531.48	432.926	438.711	346.436		-0.477633
chr5	3104820	3105031	NM_001002509	5	+		75.0519	85.0094	49.783	47.0802		24.172	38.84	25.54	15.952		0.800418
chr5	3590355	3590804	NM_001008615	3	-		15.18	1588.28	938.856	718.542		5.322	1217.54	750.729	294.85		0.968643
chr5	3908801	3908938	NM_001045388	7	+		419.174	24.0652	7.78261	11.3913		972.645	219.068	21.388	19.425		0.984753
chr5	3945257	3945401	NM_200273	5	+		38.0759	11.8276	31.0552	27.5034		240.833	94.495	183.31	305.399		0.682962
chr5	4023596	4023675	NM_001079961	13	+		134.863	22.9875	16.825	15.575		161.886	50.918	51.709	28.302		0.988135
chr5	4304682	4304777	NM_173238	20	-		377.906	122.177	45.6146	71.5833		74.068	128.599	63.536	81.045		-0.090088
chr5	4903358	4903387	NM_001110024	2	-		1.93333	1.5	3.2	0.833333		12.64	13.026	26.295	21.741		0.430604
chr5	7022553	7022788	NM_001003503	3	-		375.335	20.3983	4.69915	9.39407		37.921	26.525	5.158	5.66		0.808759
chr5	9012074	9012339	NM_001003504	11	+		123.406	86.4023	12.015	29.985		237.506	74.365	21.011	41.037		0.90281
chr5	9358430	9358975	NM_001089415	27	+		47.2747	17.0348	13.0147	14.2729		23.507	23.683	23.401	42.324		-0.352398
chr5	9540989	9541047	NM_212600	8	+		5.27119	0.423729	9.83051	12.7966		18.406	9.473	29.189	18.396		0.680169
chr5	9466805	9466910	NM_001098481	4	-		39.217	74.934	90.4623	151.16		65.641	31.735	87.315	111.276		0.707318
chr5	10989723	10989828	NM_200045	15	-		56.217	40.1698	6.48113	6.66038		80.721	36.946	15.223	20.068		0.927429
chr5	10991701	10992055	NM_001128398	6	+		61.0225	3.52676	3.03099	3.70986		96.023	20.604	2.265	2.187		0.981465
chr5	13032641	13032806	NM_001020737	5	+		43.1807	9.6988	14.0181	38.488		7.983	3.079	7.297	13.122		0.729034
chr5	13151383	13151757	NM_131033	10	-		3.33333	1.824	3.57333	0.386667		2.661	2.368	34.976	9.005		0.436211
chr5	13731133	13731211	NM_001003862	11	+		12.6962	20.5823	28.6835	36.1899		30.16	29.367	55.861	56.346		0.895836
chr5	13788926	13789234	NM_001100094	8	-		27.4628	35.9223	3.1165	1.411		176.522	71.996	15.349	14.408		0.700072
chr5	13945985	13946192	NM_001128523	49	+		38.5433	4.70673	8.30769	12.8606		461.485	311.195	32.586	45.926		0.664476
chr5	13945010	13945542	NM_001080605	21	-		57.7073	15.8386	7.75047	5.46154		461.485	311.195	32.586	45.926		0.885565
chr5	14039345	14039482	NM_131030	15	+		10.2971	26.3261	58.4928	21.5797		201.581	166.018	125.184	81.303		-0.38061
chr5	14369084	14369466	NM_182888	9	-		7.62924	2.96867	8.33943	10.1723		51.892	22.973	28.308	41.552		0.579394
chr5	14517801	14517995	NM_001003730	3	-		111.964	46.6718	53.6513	51.5077		49.675	33.63	21.388	21.998		0.862294
chr5	14853240	14853293	NM_153644	5	+		360.519	101.333	72.1667	60.2963		560.169	391.244	158.273	154.243		0.886313
chr5	14849091	14851979	NM_001160159	1	-		7.3271	34.3662	27.1371	28.2025		8.205	12.552	13.714	16.08		0.782587
chr5	14853175	14853293	NM_001201563	5	+		169.017	47.3277	34.1008	28.1849		560.169	391.244	158.273	154.243		0.885382
chr5	14849091	14851979	NM_001128722	1	-		7.3271	34.3662	27.1371	28.2025		8.205	12.552	13.714	16.08		0.782587
chr5	14984508	14984651	NM_001002703	6	-		279.799	311.333	56.7431	119.396		52.336	83.364	74.607	80.917		-0.262229
chr5	16094301	16094360	NM_001002154	9	-		6.7	1.38333	6.01667	10.8833		11.31	13.973	13.588	37.564		0.750626
chr5	16204332	16204537	NM_001082823	13	-		27.6796	8.34466	24.7961	3.71845		846.685	584.497	603.15	354.541		0.843494
chr5	17122082	17122264	NM_213323	4	+		10.612	30.5464	44.5246	148.328		9.536	6.394	6.291	20.583		0.902986
chr5	17266498	17266687	NM_001003493	12	+		63.1789	8.87895	42.6632	6.50526		67.637	70.812	64.165	28.173		0.506449
chr5	17722342	17722678	NM_131874	5	-		25.8635	319.134	134.131	307.24		2692.41	1044.66	824.581	922.373		-0.746297
chr5	17920281	17920500	NM_001004541	7	-		12.9227	6.65	11.9545	7.50455		2.883	5.447	14.343	9.648		0.041438
chr5	18510985	18511214	NM_001007112	9	-		83.0174	43.513	6.85652	4.98696		113.32	87.39	30.573	23.542		0.977448
chr5	18511653	18511731	NM_001004640	10	-		8.97468	33.4051	0.253165	0.316456		113.32	87.39	30.573	23.542		0.591849
chr5	19558986	19559112	NM_001100015	18	+		43.1969	47.7638	6.83465	5.70866		109.328	95.679	32.711	15.694		0.970758
chr5	19696033	19696076	NM_200442	19	-		25.3636	9.18182	4.22727	0.954545		37.478	15.157	22.898	20.068		0.82145
chr5	20694575	20694863	NM_001089335	3	-		45.0173	10.8754	14.6609	12.7336		22.62	18.71	19.249	42.324		-0.183139
chr5	20708375	20708563	NM_001017834	10	-		0.396825	0.343915	7.24868	2.01058		49.453	27.709	32.586	27.53		-0.222045
chr5	20681028	20681231	NM_201009	19	-		23.4412	17.4706	3.17157	6.39706		59.432	31.262	9.813	15.437		0.95998
chr5	21277212	21277376	NM_001082809	9	-		11.1455	14.8121	6.2303	4.43636		42.8	5.921	10.443	8.619		0.193178
chr5	21651158	21651571	NM_001040343	12	+		41.8357	8.3744	9.22222	5.24396		45.461	25.104	15.727	5.274		0.91235
chr5	21715557	21715949	NM_001126453	19	-		42.9033	11.9517	8.96692	11.0585		144.367	76.496	38.121	42.452		0.955683
chr5	21716683	21716985	NM_001126387	15	+		56.4356	30.5611	7.68317	11.9703		144.367	76.496	38.121	42.452		0.993871
chr5	21906130	21906330	NM_001004607	6	-		36.7861	8.83582	3.87065	1.69154		64.976	51.629	6.039	7.976		0.824204
chr5	22229268	22229378	NM_001003632	5	-		55.5856	97.2072	50.1351	53.3063		167.208	142.335	187.462	136.105		-0.490024
chr5	22237288	22237496	NM_001030118	19	+		132.392	216.455	68.6411	48.7129		87.374	114.389	31.957	21.226		0.975515
chr5	22606736	22606930	NM_001002651	16	+		5	161.933	16.8923	13.4103		69.633	116.52	30.824	32.418		0.865136
chr5	23836010	23836180	NM_200394	14	-		40.345	6.32749	2.84795	3.82456		96.688	30.077	24.408	18.267		0.995271
chr5	23850897	23851263	NM_001003631	2	+		23.4223	150.916	32.1417	17.1608		19.959	520.316	36.612	25.857		0.996848
chr5	23865995	23866157	NM_199642	5	-		34.9202	13.4356	43.9755	22.6503		114.872	116.757	160.79	144.209		0.548215
chr5	23913951	23914265	NM_001126400	13	-		38.0603	11.8	41.9333	26.8603		61.65	48.55	21.892	19.039		-0.159844
chr5	23916702	23916863	NM_001004296	14	+		407.617	53.3827	125.969	28.7963		65.42	104.442	102.538	6.046		0.102681
chr5	24293959	24294128	NM_173262	5	+		21.5882	10.1529	159.835	233.824		11.975	40.498	486.269	206.858		0.667962
chr5	24356850	24357001	NM_200102	17	-		151.053	35.7763	15.4474	16.5658		97.575	85.259	43.406	62.392		0.789564
chr5	24293959	24294128	NM_001202510	5	+		21.5882	10.1529	159.835	233.824		11.975	40.498	486.269	206.858		0.667962
chr5	24752892	24753091	NM_001080033	6	+		27.565	68.015	318.695	119.445		68.968	140.677	715.249	206.601		0.994465
chr5	24805508	24805774	NM_213533	7	+		39.8202	111.079	164.082	130.599		120.195	164.36	291.636	270.537		0.915282
chr5	24785575	24785949	NM_207091	4	-		14.3733	27.4853	36.176	71.3467		45.683	8.763	28.811	65.608		0.599515
chr5	24805496	24805774	NM_213327	6	+		38.2258	106.935	157.115	125.183		120.195	164.36	291.636	270.537		0.913525
chr5	25264816	25265230	NM_199932	10	-		197.451	87.1373	85.841	43.7181		160.112	177.859	110.59	104.33		0.546885
chr5	25242775	25243160	NM_001099739	15	-		8.74093	2.69689	1.00518	0.857513		67.415	80.049	14.217	11.835		0.641216
chr5	25288678	25288849	NM_131371	16	-		11.407	8.7907	5.77907	11.2326		4.657	11.842	18.495	15.437		-0.671505
chr5	25252167	25252318	NM_001002050	7	-		208.243	240.539	117.862	194.711		645.991	505.159	332.273	358.529		0.636214
chr5	25344025	25344157	NM_001127515	20	-		47.5414	7.76692	3.96241	6.63158		16.41	11.131	8.555	7.719		0.941622
chr5	25365278	25365809	NM_212615	7	-		388.504	23.8722	7.65038	10.3966		226.197	105.389	28.811	32.032		0.93761
chr5	25582594	25582638	NM_001100093	4	+		10.2222	35.9778	13.6889	7.31111		99.793	176.675	34.221	15.823		0.867425
chr5	25677856	25678039	NM_001006082	7	-		63.6033	111.908	88.038	52.337		341.512	127.415	192.62	78.601		-0.153748
chr5	25713479	25713659	NM_213393	11	-		17.5746	17.0829	27.5525	26.2652		225.31	169.807	171.232	265.777		0.198452
chr5	25731980	25732513	NM_200973	12	+		7.0206	15.9869	4.29963	3.84082		98.24	90.706	57.623	27.916		0.652118
chr5	25755289	25755330	NM_131327	11	+		59.0714	20	50.5476	26.5476		180.736	240.62	186.078	96.482		-0.00782234
chr5	25728587	25728856	NM_001013260	4	+		100.448	76.2148	20.8926	38.8111		26.168	34.34	19.124	24.571		0.650372
chr5	25716243	25716844	NM_001007309	8	+		134.535	26.0066	16.1694	14.4718		33.042	10.894	6.165	9.005		0.99356
chr5	25797842	25798067	NM_001002300	10	+		24.0973	11.3982	19.7743	15.115		23.507	52.339	36.612	46.054		-0.991467
chr5	25888223	25888254	NM_201510	11	-		1.75	1.40625	1.28125	6.84375		161.221	148.256	186.204	602.823		0.992448
chr5	25913596	25914136	NM_001013499	5	-		76.6396	49.7856	21.3216	20.1645		40.582	23.209	31.453	75.128		-0.380958
chr5	25914616	25914665	NM_201135	15	+		27.64	1.42	10.94	11.62		40.582	23.209	31.453	75.128		0.232545
chr5	26212384	26212461	NM_199929	12	-		13.6154	8.88462	5.76923	3.25641		74.955	63.471	29.944	15.309		0.960629
chr5	26186483	26186635	NM_200182	11	-		276.961	308.673	131.843	205.033		712.076	819.669	288.113	254.199		0.905916
chr5	26551567	26551988	NM_001128359	5	+		2.03081	0.720379	0.42891	0.36019		981.959	1537.74	1218.5	1537.55		-0.776533
chr5	26551238	26551292	NM_212630	16	-		23.3818	8.07273	2.63636	4.8		981.959	1537.74	1218.5	1537.55		-0.700602
chr5	26752842	26752995	NM_001082839	9	-		21.513	2.42208	18.9156	14.4416		344.617	53.76	81.024	27.272		0.593848
chr5	26741883	26741908	NM_001020767	2	+		5.07692	5.73077	23.4615	50.1154		19.959	5.684	12.078	21.612		0.531138
chr5	26753344	26753533	NM_001130597	7	+		107.895	1.6	9.11053	4.77895		344.617	53.76	81.024	27.272		0.992208
chr5	27325400	27325526	NM_213039	6	+		39.6535	51.8504	44.9055	39.5827		46.57	32.919	83.288	81.174		-0.517722
chr5	27377839	27378294	NM_001004001	4	-		18.5811	34.318	6.97368	3.83333		173.196	93.785	24.911	32.418		0.551459
chr5	27378362	27378685	NM_001002744	3	+		33.0741	8.18827	6.6142	6.96296		173.196	93.785	24.911	32.418		0.915656
chr5	27865559	27865877	NM_201581	15	+		16.4232	5.21944	12.931	5.9906		27.277	37.419	41.896	23.284		0.0527312
chr5	27857193	27857327	NM_001008618	10	+		219.289	209.993	1.45926	7.71852		118.864	101.363	15.852	26.758		0.992191
chr5	27843953	27844054	NM_001002661	17	-		3.13725	0.686275	3.65686	9.9902		88.926	36.472	40.009	12.221		-0.531825
chr5	27814601	27814774	NM_001003531	5	-		1.22989	1.26437	1.63793	0.442529		55.219	10.657	8.933	6.689		0.164373
chr5	27844085	27844295	NM_001002118	5	+		19.7536	39.109	32.2891	16.7725		88.926	36.472	40.009	12.221		-0.111202
chr5	28409425	28409474	NM_200306	6	-		16.56	9.08	7.7	4.7		122.191	21.788	33.718	12.864		0.955707
chr5	28439863	28439997	NM_001123279	6	-		31.9185	7.22963	3.20741	0.666667		15.523	8.289	5.787	13.25		0.634157
chr5	28331190	28331225	NM_001003781	9	+		14.0833	6.69444	1.80556	14.1389		68.746	27.946	8.429	17.367		0.604638
chr5	28537633	28537859	NM_001076733	8	-		32.8502	4.68722	10.7401	17.1189		50.783	22.262	13.462	13.25		0.795994
chr5	28491731	28491802	NM_001002719	9	+		1.29167	13.125	14.5139	6.30556		81.386	51.866	89.453	33.576		0.0797807
chr5	28565581	28566075	NM_001002640	4	+		82.9111	28.3434	18.2889	21.5475		82.052	22.736	14.091	10.935		0.996521
chr5	29074420	29074789	NM_001076590	1	+		0.410811	1.84865	0.205405	1.19459		24.394	450.451	115.874	311.831		0.951497
chr5	29049494	29049588	NM_194391	10	+		75.7684	7.67368	16.6	8.88421		116.425	32.919	22.395	26.886		0.977636
chr5	29661249	29661354	NM_001099996	4	-		66.9434	52.3962	15.5377	11.7075		45.905	27.235	27.553	22.641		0.79919
chr5	29793967	29794309	NM_001017802	8	-		14.4315	5.01458	5.41983	1.4898		108.885	105.626	19.501	18.525		0.676037
chr5	29904202	29904304	NM_001080196	19	+		125.165	174.447	10.2427	25.1262		447.958	551.814	102.286	94.939		0.993044
chr5	29915960	29916070	NM_199759	3	+		41.0541	45.4505	5.13514	2.41441		61.428	20.367	48.69	17.753		0.173011
chr5	30191581	30191812	NM_001089574	10	-		9.00862	7.81466	2.31466	3.15517		21.733	8.763	2.516	4.117		0.874499
chr5	31170234	31170438	NM_001004561	8	-		162.346	9.1122	0.912195	5.34146		363.467	105.153	12.204	15.694		0.974177
chr5	31291003	31291064	NM_200052	22	+		24.9677	26.7581	8.79032	4.64516		112.655	149.677	12.959	23.027		0.964637
chr5	31432587	31432630	NM_198065	4	+		337.023	25.3409	4.77273	10.9773		447.071	109.889	14.594	22.513		0.986885
chr5	31469895	31469946	NM_001004667	10	+		194.385	57.2115	28.9038	20.9038		92.031	107.284	37.87	29.073		0.600722
chr5	31728777	31728967	NM_001128779	2	+		21.8482	24.6649	121.571	142.78		100.014	15.868	29.944	47.727		-0.286871
chr5	32057278	32057653	NM_001128731	4	-		27.6303	1.125	0.404255	6.13564		36.591	10.184	2.516	8.362		0.973967
chr5	32031173	32031674	NM_001077571	20	+		7.92032	2.47809	4.04183	1.08964		29.716	8.526	6.165	3.859		0.931198
chr5	32227541	32228027	NM_001089411	9	+		6.62012	2.54415	11.8378	5.75975		23.95	20.604	12.833	1.93		-0.20214
chr5	32173718	32174335	NM_201073	1	-		3.78964	39.4385	67.7184	135.46		166.986	691.544	274.651	450.766		0.260706
chr5	32155491	32155663	NM_201459	10	-		32.1965	22.4277	11.8266	5.20809		1627.29	1160.23	753.245	473.407		0.998902
chr5	32343142	32343407	NM_001017884	5	-		0.781955	1.12782	5.88346	2.32331		7.318	5.684	28.685	10.291		0.986193
chr5	32338339	32338427	NM_199757	3	+		66.382	10.1011	112.225	287.202		55.219	7.342	31.202	72.426		0.811412
chr5	32398248	32398308	NM_174860	15	+		15.6885	0.819672	6.44262	9.5082		106.889	127.178	91.592	54.416		-0.341977
chr5	32625528	32625692	NM_199863	6	+		148.933	184.218	40.6424	20.0121		37.478	73.654	31.579	36.02		0.757279
chr5	32673768	32674215	NM_001102674	4	-		7.85938	3.22321	1.69643	3.45759		11.753	11.131	15.601	9.005		-0.316329
chr5	33620720	33620872	NM_201005	7	+		96.3399	87.9739	31.0523	49.0654		160.333	179.517	80.017	73.069		0.9262
chr5	33711929	33712149	NM_001128686	4	-		190.253	32.6923	56.1086	68.8371		56.771	15.631	15.475	26.758		0.984431
chr5	33713723	33713965	NM_001003771	5	+		35.1687	16.2099	7.5144	6.48148		73.403	17.525	10.443	9.134		0.977062
chr5	34034108	34034544	NM_001018165	8	-		64.3776	8.96339	9.0984	8.27918		241.055	130.967	45.544	59.433		0.909266
chr5	33997951	34000987	NM_001077801	1	-		1.76753	14.2848	28.4998	22.6296		3.77	26.762	66.304	31.132		0.928141
chr5	34108135	34108235	NM_200648	15	+		4.75248	3.73267	2.27723	3.71287		159.89	86.68	41.77	34.476		0.786441
chr5	34123131	34123174	NM_212898	4	-		33.9091	7.86364	40.1818	85.5682		92.918	50.918	56.993	103.558		0.774001
chr5	34409142	34411379	NM_199754	1	+		1.25648	49.7498	110.765	110.173		18.85	194.674	644.165	455.655		0.955977
chr5	34542566	34542934	NM_177984	5	+		10.4905	8.81843	28.8049	24.7805		23.063	11.131	29.44	33.061		0.844639
chr5	34500602	34500757	NM_201584	7	+		2316.49	5935.61	4156.46	14139.7		117.534	248.672	460.351	965.597		0.929195
chr5	34639763	34639912	NM_213490	4	-		29.1133	24.36	78.3533	45.1333		241.72	111.784	91.844	87.606		-0.498235
chr5	34916085	34916250	NM_001005945	9	-		6.43373	34.5783	25.1807	3.57831		113.098	68.681	26.924	7.59		0.0166369
chr5	34898785	34898944	NM_201065	5	-		33.425	8.3	24.8938	0.69375		128.178	59.444	85.05	20.197		0.972183
chr5	34899105	34899198	NM_001080173	9	+		6.2234	1.08511	12.2553	13.5		128.178	59.444	85.05	20.197		-0.311905
chr5	34892759	34892801	NM_213359	14	-		0.976744	2.81395	3.93023	1.69767		5.544	4.026	5.536	8.105		-0.364068
chr5	34904594	34904716	NM_200047	7	-		773.585	484	7144.43	12889.6		37.478	40.972	67.939	62.649		0.846286
chr5	34905574	34905602	NM_001002144	4	+		16	7.27586	22.5517	12.4138		37.478	40.972	67.939	62.649		0.557467
chr5	35577504	35577685	NM_200354	7	-		7.23077	1.1978	1.35165	4.6978		9.979	2.368	1.384	2.187		0.843893
chr5	36196467	36196651	NM_001077545	20	+		2.05946	0.12973	5.02703	2.91351		26.611	6.158	9.436	10.935		0.00584232
chr5	36600215	36600590	NM_213129	8	+		7.29787	6.1383	21.6117	13.3431		15.745	4.263	8.304	8.362		-0.113646
chr5	36818455	36818581	NM_001020781	27	-		12.7559	9.65354	5.5748	6.07874		35.26	23.446	34.473	26.372		0.177709
chr5	36882267	36882405	NM_001017612	10	-		4.58273	1.20144	3.90647	1.64029		58.323	20.367	21.64	23.027		0.705581
chr5	37074071	37074152	NM_001002722	5	-		17.0122	116.817	10.4634	12.1585		520.696	235.172	86.937	53.001		0.0858568
chr5	37404131	37404491	NM_001126477	14	+		56.2022	15.2576	4.28532	4.52909		135.94	54.708	29.189	28.173		0.999323
chr5	37362602	37362850	NM_001002096	7	+		0.216867	0.0722892	1.01205	0.0361446		77.838	29.841	50.703	33.576		0.245495
chr5	37573340	37573565	NM_001004659	7	+		104.699	76.6903	58.6283	55.6947		59.654	107.995	68.317	38.85		0.194367
chr5	38039567	38039999	NM_001115065	8	+		4.11778	6.98152	10.8522	5.51039		4.213	26.525	14.091	14.022		0.360184
chr5	38131043	38131280	NM_213522	6	+		83.4748	58.3739	31.9538	51.8487		251.034	195.859	46.299	31.904		0.849232
chr5	38254981	38255121	NM_001017899	11	+		48.8369	89.0709	10.2057	28.6525		206.016	158.913	276.664	266.806		-0.975449
chr5	38250258	38250494	NM_001005390	6	+		2.78903	0.202532	13.0338	3.78481		63.424	40.972	119.145	81.303		0.966668
chr5	38197469	38197806	NM_199692	2	-		205.459	46.997	37.1627	37.5917		193.819	267.855	28.434	45.025		0.395305
chr5	38330889	38331109	NM_001017863	4	+		149.321	38.7376	5.38914	10.0452		262.122	40.498	12.456	18.01		0.992809
chr5	38495769	38495837	NM_205673	9	+		501.435	38.1739	90.9565	53.8841		115.316	165.544	99.141	76.285		-0.0320243
chr5	38500319	38500425	NM_201099	14	+		63.8879	62.9439	267.869	314.523		87.817	220.963	332.777	255.228		0.734283
chr5	38450833	38451379	NM_130921	6	+		6.31627	3.0713	3.33272	8.66545		103.341	32.209	5.41	28.302		0.32562
chr5	38524382	38524668	NM_001003642	12	-		14.4878	7.31707	8.12892	4.24042		49.009	27.472	7.046	8.362		0.859865
chr5	38549578	38549639	NM_200003	4	-		7.67742	19.7581	292	602.677		28.164	66.312	385.492	633.44		0.993673
chr5	38632200	38633007	NM_001128795	6	+		43.3403	20.8243	31.0111	31.2475		6.875	2.605	34.976	26.758		0.0516772
chr5	38890422	38890561	NM_001089532	24	+		3.3	17.8286	3.35	0.75		97.131	74.602	86.685	32.675		0.196362
chr5	38943852	38944251	NM_001099229	8	+		15.965	3.31	0.575	0.03		107.554	169.57	58.755	36.663		0.349616
chr5	38943806	38943858	NM_001244754	9	+		61.3208	11.0377	8.11321	0.679245		107.554	169.57	58.755	36.663		0.287984
chr5	39344805	39344849	NM_001007152	11	+		7.02222	1.15556	1.95556	1.35556		100.014	49.261	52.213	34.734		0.96981
chr5	39559983	39560187	NM_212763	4	-		40.9561	31.5024	6.02927	3.5122		45.461	33.156	4.152	6.175		0.994606
chr5	40211801	40211864	NM_001017401	5	-		0.546875	1.92188	0.28125	0.21875		33.042	17.052	16.985	15.823		-0.124096
chr5	40424775	40424923	NM_001020638	13	-		9.75168	16.5906	3.13423	7.36242		25.281	13.026	17.74	31.26		-0.408827
chr5	40699836	40700369	NM_001193540	16	+		228.264	46.3446	21.1835	23.7772		96.466	170.518	30.698	37.307		0.242047
chr5	40699836	40700369	NM_001008644	15	+		228.264	46.3446	21.1835	23.7772		96.466	170.518	30.698	37.307		0.242047
chr5	41411259	41411508	NM_199829	15	-		51.24	9.084	0.212	0.784		26.611	11.131	3.271	1.286		0.975973
chr5	41619412	41619705	NM_001100075	10	+		5.62925	2.32653	1.0102	1.7619		21.289	14.21	2.139	4.374		0.920875
chr5	41915979	41917429	NM_001100006	2	-		46.8504	49.2198	23.9697	20.8001		52.779	48.313	30.573	34.476		0.944191
chr5	42721735	42722226	NM_001006105	3	-		196.407	152.876	38.5264	35.1159		80.943	117.941	30.95	30.874		0.833928
chr5	42761294	42761350	NM_199558	20	-		4.36842	8.26316	11.8421	25.7719		226.64	440.978	449.28	433.914		0.550859
chr5	42762164	42762222	NM_001002505	5	+		141.593	75.1017	10.8983	14.7119		226.64	440.978	449.28	433.914		-0.879528
chr5	43129005	43129111	NM_201481	17	+		65.4673	56.6729	83.0841	121.206		283.633	218.357	493.063	347.98		0.445128
chr5	43263482	43263663	NM_213554	10	-		3.2967	4.54396	26.5275	12.7802		95.801	72.707	119.02	69.596		0.655078
chr5	43327346	43327465	NM_001128349	23	-		3.89167	1.85833	1.91667	2.86667		17.741	14.21	13.839	19.554		0.747246
chr5	43411651	43411808	NM_212560	6	+		21.1519	65.6266	66.5443	41.8291		81.165	96.39	191.236	101.628		0.637763
chr5	43710836	43710879	NM_001013272	2	+		25.2955	36.1136	34.3182	57.25		155.011	319.484	298.933	478.039		0.973742
chr5	43877605	43877830	NM_001128747	11	+		24.2124	20.6549	12.1106	26.8805		52.336	20.367	21.011	14.665		0.195588
chr5	44491049	44491294	NM_213075	11	-		3.76423	0.158537	96.5854	68.0772		5.322	30.551	229.735	268.093		0.929431
chr5	44570455	44570610	NM_200200	6	+		49.5705	14.4359	33.1859	48.391		111.768	123.625	80.898	76.414		-0.513469
chr5	45437883	45438089	NM_212927	17	-		115.304	52.8841	59.9517	59.6812		99.571	66.076	66.052	69.982		0.993154
chr5	45424073	45424192	NM_131191	9	-		34.25	82.2417	17.9833	29.6167		123.743	30.551	31.579	24.314		-0.144432
chr5	45965323	45965469	NM_001005932	18	+		23.1633	58.585	80.7687	28.1361		159.89	96.153	258.547	166.079		0.451205
chr5	45965336	45965469	NM_001122786	19	+		25.3134	63.4478	86.5672	30.1642		159.89	96.153	258.547	166.079		0.442879
chr5	47505563	47505876	NM_001077627	7	-		5.78662	2.6879	8.92038	7.24841		86.265	21.078	23.024	17.367		-0.088114
chr5	48696814	48696949	NM_199995	3	+		47.0515	13.6397	492.757	258.118		14.193	15.868	22.898	32.161		0.58878
chr5	49758071	49758231	NM_001013453	10	-		21.1988	2.67081	8.0559	6.47205		117.312	71.76	43.028	27.658		0.746085
chr5	49853374	49853570	NM_213371	12	-		44.8325	2.86802	6.91371	2.73604		63.646	27.235	21.64	15.309		0.971374
chr5	50042791	50042936	NM_001130962	9	-		13.5137	38.4384	8.95205	26.1027		6.209	2.842	2.39	2.444		-0.32374
chr5	50811342	50811720	NM_001201438	7	-		55.8496	10.1636	3.73351	7.51715		9.314	6.394	5.536	7.204		0.928996
chr5	52599567	52599654	NM_001017914	17	+		49.0114	36.7955	15.375	12.4091		95.801	72.944	66.807	55.96		0.93072
chr5	52797603	52797832	NM_001048067	20	+		11.8522	1.82174	5.56522	2.07391		89.592	85.022	20.633	21.355		0.412673
chr5	52913056	52913495	NM_001110283	10	+		26.9045	5.21818	5.73636	11.4205		64.311	29.13	15.098	30.746		0.952867
chr5	54828344	54828468	NM_212961	12	-		65.248	35.608	16.064	18.752		228.858	105.863	58.503	43.224		0.989622
chr5	55153091	55153206	NM_131513	9	-		2371.38	455.034	31.3534	72.1724		1076.65	633.047	137.892	190.392		0.936542
chr5	55167658	55167993	NM_001002322	16	-		2.07738	5.63393	7.9375	8.05952		33.929	24.394	24.659	23.928		-0.920295
chr5	55793421	55793666	NM_001003613	13	-		23.0935	4.34146	7.66667	9.85772		17.963	13.736	18.495	12.221		0.460092
chr5	57343339	57343371	NM_200511	8	+		8.57576	0.969697	1.27273	1.69697		43.687	9.947	20.13	38.336		0.72329
chr5	57342147	57342440	NM_001002558	8	-		12.1769	4.81973	4.31633	14.8129		43.687	9.947	20.13	38.336		0.894726
chr5	57527921	57528213	NM_001077373	18	-		7.0785	0.409556	7.20478	1.27304		31.712	7.579	13.085	8.49		0.726793
chr5	57687063	57687169	NM_001083828	12	+		42.9907	63.5234	34.2617	5.99065		266.335	211.726	257.037	63.293		0.712382
chr5	58373464	58373672	NM_212628	12	-		461.096	149	128.086	88.6459		99.793	2.368	69.952	51.843		0.648747
chr5	58762518	58762662	NM_199934	3	+		120.152	58.8759	66.7448	158.703		150.132	53.524	103.167	203.9		0.968045
chr5	58803858	58803918	NM_001004005	3	-		3.70492	4.90164	7.55738	2.90164		19.293	14.92	45.293	45.025		0.241275
chr5	59064724	59065059	NM_001167955	6	+		20.0506	33.8423	10.6696	10.1101		25.281	7.815	17.488	12.993		-0.395876
chr5	59003998	59004192	NM_001128754	4	-		2.33333	2.4359	18.6308	9.12308		10.866	4.026	45.922	12.221		0.942563
chr5	59008008	59008093	NM_001193591	11	+		2.55814	15.5116	0.465116	0.581395		112.655	47.603	13.839	9.648		0.155646
chr5	59092925	59093096	NM_200625	15	+		9.56395	15.9593	4.85465	16.0872		16.632	10.184	7.926	26.115		0.550806
chr5	59064724	59065059	NM_001003650	7	+		20.0506	33.8423	10.6696	10.1101		25.281	7.815	17.488	12.993		-0.395876
chr5	59122335	59122488	NM_213376	15	+		49.7922	4.52597	60.961	38.1558		75.177	93.548	122.039	202.742		0.099884
chr5	59922102	59922281	NM_213014	19	+		65.6333	168.394	32.3389	12.6222		113.985	167.676	111.093	63.678		0.93655
chr5	60694328	60694363	NM_200378	2	-		26.25	39.6667	2.91667	5.44444		96.244	122.441	31.202	27.015		0.991327
chr5	60695376	60695474	NM_001024395	7	+		102.313	20.0808	7.80808	10.8081		96.244	122.441	31.202	27.015		0.479438
chr5	60809880	60810126	NM_001020466	17	-		91.1457	77.2024	36.2429	51.2024		62.537	77.207	31.453	30.617		0.846813
chr5	60728351	60728456	NM_001123287	18	+		22.4057	18.7075	1.74528	12.4057		30.16	28.42	20.633	23.156		0.963892
chr5	60932577	60932749	NM_001017896	6	+		116.006	127.717	46.5145	29.8728		696.109	405.927	175.006	71.397		0.857667
chr5	61251842	61252217	NM_001127307	9	+		42.5771	17.3617	13.2207	14.2686		5.322	66.549	42.147	37.435		-0.796045
chr5	62566372	62566608	NM_001013530	7	+		19.2954	4.71308	12.8692	12.5443		13.527	12.315	14.091	15.952		0.369217
chr5	62528092	62528251	NM_001030174	19	+		1.63125	0.95	13.8375	3.8625		33.486	64.418	125.562	84.647		0.893227
chr5	62566097	62566190	NM_207076	13	-		14.0106	4.94681	4.96809	3.34043		13.527	12.315	14.091	15.952		-0.32665
chr5	62705741	62705997	NM_200763	13	+		1.64981	1.09339	0.929961	1.01556		17.297	5.447	3.9	5.017		0.994197
chr5	62893185	62893476	NM_001144793	3	+		127.524	1.10959	15.9418	6.84589		60.984	30.788	18.243	31.132		0.908266
chr5	63024027	63024126	NM_001114720	8	+		2.29	1.88	1.64	0.16		9.757	2.605	2.139	4.503		0.319628
chr5	62966076	62966167	NM_213319	11	+		3.63043	2.23913	10.4565	2.02174		12.419	20.841	15.223	26.758		-0.52912
chr5	62950728	62950763	NM_001017645	13	+		2.86111	2.25	12.7222	19.9722		371.007	39.077	34.473	43.61		-0.509094
chr5	62950124	62950247	NM_001002519	2	-		19.379	1.12903	9.3629	4.12097		371.007	39.077	34.473	43.61		0.899066
chr5	63138374	63138431	NM_001076598	5	+		17	9.74138	16.9828	23.5517		24.394	7.815	21.514	18.653		0.638096
chr5	63052371	63052566	NM_183069	6	+		79.5765	7.72449	20.8571	6.22449		126.847	52.339	39.757	24.571		0.957614
chr5	63167078	63167143	NM_001099995	5	-		66.7121	3.24242	3.42424	9.45455		63.424	6.394	10.694	1.415		0.976227
chr5	64424433	64424873	NM_199780	9	+		133.399	57.1451	14.9524	20.7052		78.504	155.124	46.928	50.943		0.285956
chr5	64522058	64522147	NM_001024400	4	+		68.7667	65.2778	40.9333	51.5333		151.463	130.967	59.132	33.319		0.861519
chr5	64571036	64571397	NM_213060	11	+		196.837	233.702	26.721	54.4227		49.231	98.995	25.666	37.564		0.857602
chr5	64651302	64651607	NM_200205	3	-		16.5131	5.59477	6.18627	9.79085		21.954	7.815	4.529	8.748		0.952551
chr5	65060375	65060539	NM_178287	6	+		59.1333	41.9333	89.0909	149.291		21.954	25.578	28.182	40.909		0.936459
chr5	66502679	66502742	NM_001089344	16	-		6.78125	11.9688	3.45312	6.3125		37.256	35.051	45.041	88.378		-0.304645
chr5	66912863	66913078	NM_001002470	6	-		31.5046	16.0093	28.2593	19.7176		65.863	38.603	48.69	51.715		0.810663
chr5	67596217	67596305	NM_001013330	6	+		3.14607	0.539326	3.39326	0.235955		23.063	5.684	8.429	3.988		0.684423
chr5	67630944	67631108	NM_001034180	5	-		108.715	11.5455	4.46061	7.73333		81.386	67.26	12.833	12.35		0.735363
chr5	67596217	67596305	NM_001126394	6	+		3.14607	0.539326	3.39326	0.235955		23.063	5.684	8.429	3.988		0.684423
chr5	67549598	67549660	NM_001007442	13	+		22.0635	7.5873	6.33333	16.9048		151.685	126.704	91.844	162.605		0.834126
chr5	67974979	67975148	NM_200745	5	+		372.1	276.582	305.776	493.018		139.931	226.41	282.325	172.382		-0.615761
chr5	68429325	68429404	NM_001002146	6	+		6.8625	0.8	2.9375	7.5625		6.875	9.236	11.952	8.362		-0.605777
chr5	68650809	68650976	NM_001100001	18	-		91.5179	2.35119	5.38095	8.22024		42.135	2.368	14.594	17.367		0.939565
chr5	68956830	68957064	NM_212798	10	+		41.566	98.1532	4.32766	5.10638		86.709	82.891	20.382	16.338		0.829043
chr5	69120023	69120129	NM_001029972	5	+		130.85	30.0467	0.906542	0.71028		208.677	81.47	2.265	3.988		0.986343
chr5	69158026	69158384	NM_199554	19	+		51.1978	32.8022	22.0056	29.0864		31.047	12.078	6.542	16.209		0.960055
chr5	69208230	69208293	NM_001017667	13	+		8.70312	10.5938	7.53125	1.04688		26.39	23.446	27.553	14.279		0.825355
chr5	69423412	69423703	NM_001083565	32	-		27.2979	13.4315	0.835616	3.06164		21.067	16.815	17.488	35.891		-0.287046
chr5	69817713	69817741	NM_001007766	14	-		30.6552	8.27586	27.8621	18.5517		633.129	546.131	427.64	455.655		0.102161
chr5	70175921	70176273	NM_001100947	5	-		32.6402	32.255	55.6487	29.3683		132.17	103.968	90.46	75.385		-0.169929
chr5	70362050	70362237	NM_200974	7	-		225.984	49.6383	20.1011	32.3457		53.444	31.262	16.733	15.309		0.950784
chr5	70289052	70289119	NM_213280	10	-		4.95588	6.33824	23.3088	11.1029		187.167	145.414	129.085	46.569		-0.292667
chr5	70975786	70976015	NM_001003866	9	+		13.187	6.63043	13.8391	11.5652		17.741	6.868	16.104	10.806		0.921098
chr5	70935057	70935253	NM_001002099	8	-		46.4518	10.6244	11.2183	16.2995		98.906	94.022	47.809	116.422		0.316234
chr5	71134255	71134303	NM_001077760	20	-		36.8776	1.5102	18.4898	6.08163		19.737	38.13	54.351	20.326		-0.219776
chr5	71730782	71730892	NM_001114693	4	-		2.76577	6.36937	15.9009	17.5946		124.63	135.467	104.928	59.305		-0.827497
chr5	71731245	71731372	NM_001080070	13	+		14.4453	60.9375	33.7812	33.3359		124.63	135.467	104.928	59.305		0.238279
chr5	72072131	72072287	NM_001014296	11	-		21.4204	6.29299	20.535	43.949		15.745	13.499	103.922	76.285		0.514343
chr5	72138210	72138369	NM_178286	5	+		4.20625	3.075	46.175	58.6437		3.77	2.605	13.588	19.425		0.991705
chr5	72299227	72299355	NM_001025178	4	-		10.4031	2.79845	6.73643	3.04651		24.172	16.341	21.892	26.886		0.279839
chr5	72365704	72365870	NM_200895	9	-		12.9281	34.0299	24.0778	60.7545		68.746	52.339	47.18	87.606		0.623741
chr5	72365704	72365894	NM_199819	9	-		11.3455	30.6283	21.2827	53.7853		68.746	52.339	47.18	87.606		0.616289
chr5	72437495	72437688	NM_001002336	14	-		62.433	19.5	22.2577	18.3093		16.189	4.973	12.959	14.279		0.557014
chr5	72590722	72590867	NM_001128422	13	+		20.0479	2.85616	11.1918	6.5411		11.088	9.236	9.059	10.291		0.676214
chr5	72561306	72561524	NM_213301	13	-		19.6301	3.6895	0.694064	3.09132		6.875	6.394	2.139	5.403		0.644166
chr5	72590750	72590867	NM_001002564	13	+		24.8051	3.5339	13.8475	8.09322		11.088	9.236	9.059	10.291		0.676214
chr5	72737409	72737639	NM_001100091	7	-		6.75758	1.96104	4.27273	2.96104		25.724	6.394	6.542	3.988		0.89069
chr5	72657305	72657613	NM_199914	6	-		31.2945	2.39482	19.945	13.7767		4.435	3.552	30.069	22.384		0.0769626
chr5	72657743	72657986	NM_001002181	9	+		1.55738	0.446721	3.39344	2.46721		4.435	3.552	30.069	22.384		0.938904
chr5	72833891	72834302	NM_001083850	4	-		2.43447	13.1359	20.5631	11.6602		46.792	5.921	24.534	11.578		-0.56786
chr5	72746359	72746602	NM_001002181	9	+		4.57787	7.68443	11.6926	27.6352		9.314	4.263	14.469	9.648		0.195372
chr5	72980731	72981049	NM_001205027	4	+		52.1818	65.0063	25.6803	33.7085		86.93	123.152	43.28	38.336		0.969545
chr5	72908544	72908731	NM_001007410	16	+		39.7394	111.144	34.7819	37.7872		78.725	182.359	144.308	67.666		0.753379
chr5	72898750	72899646	NM_001076643	6	+		0.331104	1.07023	8.10702	4.94649		4.435	2.605	14.972	22.127		0.758592
chr5	74878425	74878537	NM_001007778	14	-		23.3009	33	3.31858	6.24779		4.657	6.631	8.178	16.724		-0.608575
chr5	75308841	75309065	NM_173268	20	+		27.3733	8.8	40.88	24.7022		19.959	38.13	46.803	32.161		0.231808
chr5	75293034	75293092	NM_200683	9	-		27.3898	5.27119	9.89831	14.9153		27.72	32.683	73.349	66.38		-0.34418
chr5	75250582	75250946	NM_001024430	3	-		10.4438	3.16438	6.35616	11.0712		62.758	35.288	45.67	33.576		0.358973
chr5	75251683	75251877	NM_001017572	9	+		75.9692	19.8564	61.4256	34.2462		62.758	35.288	45.67	33.576		0.914434
chr5	75572197	75572380	NM_205634	10	+		122.571	14.4837	29.3098	32.8043		19.959	33.63	27.805	25.986		-0.898015
chr6	3141387	3141499	NM_200355	12	+		25.9381	1.61947	3.07965	2.74336		47.235	17.525	23.401	27.53		0.960046
chr6	9435294	9435340	NM_214773	6	+		68.7872	146.638	27	10.4894		1489.13	529.552	61.9	72.941		0.379333
chr6	27222849	27223405	NM_001083826	15	+		8.08438	61.8995	37.8312	35.3465		36.147	46.892	52.338	54.159		0.571114
chr6	39850498	39850969	NM_001040340	8	-		31.0297	13.4407	16.8602	8.41525		31.268	18.236	20.004	10.677		0.986877
chr6	44092497	44092543	NM_001080600	12	-		14.2979	29.8936	4	0.978723		60.763	31.735	25.792	8.748		0.433763
chr6	48257977	48258151	NM_001111156	15	-		9.85143	3.05143	6.86286	6.12571		21.733	12.315	12.833	12.221		0.823536
chr6	1700375	1700407	NM_213212	4	+		2.21212	1.63636	38.3939	56.5455		5.101	6.868	230.616	271.952		0.98775
chr6	3528713	3528781	NM_199547	12	+		141.478	64.3768	55.9855	17.2754		241.942	490.475	359.826	106.903		0.161215
chr6	6165590	6165674	NM_001201446	7	-		4.4	1.32941	6.82353	6.37647		32.155	38.84	60.265	83.875		0.690397
chr6	6174657	6175339	NM_001079912	7	-		247.382	116.804	49.0981	86.041		260.57	134.283	45.796	68.953		0.990979
chr6	6969001	6969195	NM_001004602	14	-		5.5641	37.8564	6.41538	18.6769		23.95	14.21	17.111	57.761		-0.0840217
chr6	8096616	8096771	NM_201582	15	+		4.91026	28.6667	10.891	12.3333		144.81	126.231	112.98	114.621		-0.239317
chr6	7602864	7603409	NM_001080169	17	-		153.176	34.1245	11.7912	12.4377		12.862	24.867	6.794	5.017		0.187447
chr6	9947926	9948023	NM_213026	11	+		43.8061	8.67347	34.9286	44.7755		371.45	342.457	414.807	663.156		0.568723
chr6	13717315	13717446	NM_001033919	5	+		23.0379	6.90909	5.68182	9.56818		2.661	4.737	6.416	10.806		-0.534059
chr6	14965121	14965153	NM_001083554	12	-		29.303	6	7.12121	2.90909		101.567	96.627	26.547	28.044		0.637668
chr6	15044950	15045128	NM_001003492	4	+		7.38547	2.93296	13.1229	8.26257		6.431	5.684	18.746	15.952		0.854409
chr6	18236037	18236139	NM_200375	8	-		12.4466	14.5631	4.70874	1.62136		183.397	44.998	36.989	11.321		0.575336
chr6	19659553	19659612	NM_001098480	4	+		50.3833	5.61667	19.55	10.3		90.479	35.288	39.883	25.986		0.966882
chr6	19542139	19542573	NM_001172228	11	-		25.0184	10.2874	3.30115	2.15172		36.812	30.314	13.588	13.122		0.926202
chr6	21613020	21613140	NM_001005401	16	+		32.0496	11.8182	41.8017	13.1983		401.166	347.667	246.972	196.953		0.0997883
chr6	29001682	29001942	NM_130929	12	-		8.341	5.87739	17.8314	19.0115		4.879	8.526	30.321	25.471		0.936496
chr6	30183496	30183865	NM_001110470	23	+		26.6703	6.32432	8.13784	8.17297		52.557	24.157	34.599	50.943		0.64341
chr6	31060240	31060444	NM_131073	24	+		12.2098	1.75122	12.5122	3.03902		49.453	62.05	59.887	65.222		-0.724259
chr6	37477730	37478094	NM_001030077	17	+		14.5178	6.54521	2.3589	5.84384		11.31	13.026	5.41	7.59		0.625803
chr6	37603560	37603646	NM_212759	31	+		110.966	23.2069	15.6207	15.023		27.055	28.42	44.79	68.31		-0.579419
chr6	36891331	36891672	NM_001003851	7	+		8.68421	4.39474	9.46199	8.69006		10.423	12.552	87.44	57.375		0.627165
chr6	41739558	41739720	NM_200137	13	+		50.8282	3.46626	9.52761	6.07362		87.152	65.602	26.798	24.442		0.728246
chr6	42221115	42221525	NM_205661	4	-		30.2092	17.0754	11.4234	5.86861		26.168	13.499	23.527	17.495		0.499612
chr6	43381604	43381803	NM_001013450	11	+		54.865	17.735	11.435	13.715		103.341	141.624	19.627	23.413		0.455982
chr6	45886045	45886276	NM_201476	6	-		61.0043	75.306	120.78	78.9397		261.013	637.784	935.171	513.287		0.93635
chr6	49534888	49535131	NM_212647	6	+		45.8033	19.5205	19.9713	23.7951		44.574	36.235	25.666	44.382		0.607668
chr6	50636399	50636471	NM_001123252	15	-		169.014	8.60274	36.5753	21.8767		79.834	46.656	44.035	37.307		0.958857
chr6	52163392	52163529	NM_001082798	6	+		29.6884	20.9058	168.775	146.029		226.418	214.568	779.666	674.477		0.999239
chr6	53096258	53096367	NM_199842	10	-		383.982	334.027	15.5182	19.4727		161.221	129.783	26.547	18.525		0.995702
chr6	54135772	54135795	NM_201146	6	-		52.1667	2.20833	321.25	232.667		23.285	21.078	160.79	472.764		0.625328
chr6	56048377	56048539	NM_199742	9	+		52.135	18.816	27.3558	8.71779		95.136	98.758	68.946	41.423		0.623331
chr6	57426274	57426539	NM_001002869	21	-		16.6053	19.3684	42.8872	5.6015		87.817	102.784	70.833	15.694		0.403963
chr6	58877376	58877648	NM_200076	22	-		68.1905	9.9011	42.0989	23.5604		68.302	106.337	61.145	47.083		-0.402582
chr6	59094230	59094263	NM_001123374	12	+		51.2353	18.0294	33.0588	31.0882		66.085	51.392	51.206	63.035		0.743742
chr6	47583	47732	NM_205714	13	+		216.313	6.84667	6.68	7.13333		59.432	37.182	6.165	10.677		0.834356
chr6	84313	84503	NM_001076664	5	+		76.3403	18.1257	21.0524	37.1675		47.457	42.629	33.97	70.368		0.243895
chr6	1679	1857	NM_001033738	4	-		3.77654	2.12291	3.82682	8.75419		7.096	14.92	9.688	13.508		0.159951
chr6	314276	314397	NM_001008588	7	-		8.05738	5.18852	23.2869	15.541		8.427	3.552	8.052	5.66		0.493953
chr6	1422874	1422887	NM_213183	14	+		14.8571	8	16.7143	26		20.624	12.078	29.063	46.312		0.987503
chr6	1367468	1367757	NM_183072	16	+		355.152	100.366	64.1966	81.0552		113.098	89.759	56.742	78.987		0.866328
chr6	1617439	1617633	NM_001007394	8	-		9.9641	7.11795	24.041	37.7897		137.049	86.68	70.204	121.568		0.0515378
chr6	1655878	1656025	NM_001030251	11	-		13.8378	20.8378	8.03378	15.2838		10.201	9.71	8.681	11.835		0.385373
chr6	1991374	1991511	NM_213161	13	-		7.51449	11.6522	14.2464	0.347826		24.837	25.104	89.957	24.7		0.641896
chr6	2237413	2237476	NM_207083	5	+		15.8281	7.51562	7.46875	6.48438		148.137	91.89	26.169	38.979		0.875256
chr6	3321746	3321975	NM_001037108	4	-		30.7435	57.1913	138.513	187.435		53.001	28.656	72.594	91.208		0.862705
chr6	3280973	3281228	NM_201144	18	+		7.16797	6.79297	2.42578	4.37109		21.067	23.92	9.059	8.49		0.900618
chr6	3505367	3505473	NM_213464	13	+		77.4019	6.73832	30.4673	5.70093		81.608	139.256	108.577	19.682		0.0341075
chr6	3678915	3679099	NM_200703	10	+		6.75676	57.7081	19.6486	32.0432		61.871	43.814	77.879	47.855		-0.706198
chr6	3868193	3868334	NM_200247	6	-		25.0493	18.0845	12.162	14.4014		31.047	11.605	14.72	13.765		0.82885
chr6	3852860	3852918	NM_212782	18	-		67.3559	9.62712	0.813559	4.83051		78.282	49.971	14.594	43.996		0.862812
chr6	4432199	4432660	NM_201285	3	+		0.5671	0.658009	2.74026	10.7273		3.992	3.789	9.436	26.372		0.999156
chr6	6212141	6212274	NM_001089324	14	-		13.4179	3.68657	6.34328	0.522388		157.451	142.809	60.139	36.406		0.670502
chr6	6187548	6187578	NM_200502	6	+		10.5806	2.64516	246.226	186.71		208.012	140.203	2677.18	1593.76		0.984824
chr6	6579293	6579482	NM_001014319	2	+		13.0421	3.55263	4.16842	2.93684		5.988	5.921	2.894	1.415		0.591234
chr6	6695983	6696062	NM_199777	19	+		28.8375	1.625	7.2625	8.9875		21.733	7.105	15.978	13.122		0.903323
chr6	6719370	6719439	NM_001003440	6	+		7.1	6.92857	12.9286	10.8143		72.738	29.841	55.358	43.61		0.0457523
chr6	7024485	7024678	NM_214749	7	-		178.046	7.15464	11.8402	7.28866		46.792	17.052	10.694	6.689		0.970764
chr6	7039798	7039984	NM_200022	12	-		29.8449	2.84492	35.5241	23.9947		202.468	21.078	49.445	43.481		0.451539
chr6	7239518	7239592	NM_001007038	30	+		3.52	4.32	3.33333	6.6		23.063	11.131	19.627	40.137		0.768275
chr6	7450532	7450669	NM_001002070	13	+		91.913	62.2246	366.862	438.297		100.236	111.784	171.735	148.583		0.881372
chr6	7637101	7637147	NM_201052	8	-		132.234	85.1702	1818.98	3045.7		182.066	221.199	1784.66	2532.6		0.995281
chr6	7627703	7628121	NM_001008617	17	-		16.9594	2.82339	9.36993	4.13126		28.829	48.313	16.356	11.835		-0.155974
chr6	7651655	7651845	NM_001202458	9	-		36.5393	4.04712	5.34031	10.6073		22.176	7.105	9.562	12.35		0.987165
chr6	7827751	7827903	NM_001004636	14	-		13.7255	34.4052	4.73203	9.47059		45.461	25.341	17.362	12.092		0.226594
chr6	8019103	8019344	NM_170763	2	+		89.5868	92.876	70.8926	34.9132		45.239	128.836	65.926	37.821		0.603699
chr6	8080461	8080609	NM_199557	13	+		10.3826	22.6107	30.0403	10.2617		217.104	134.046	192.243	146.396		-0.0681068
chr6	8050544	8050686	NM_001009889	15	+		461.643	137.552	103.811	51.972		898.799	947.795	819.297	548.664		0.526729
chr6	8049040	8049154	NM_213159	5	-		107.991	84.8783	102.252	196.009		50.562	65.839	152.108	85.033		-0.0208874
chr6	8561893	8562188	NM_001111249	10	+		5.10473	0.722973	6.31419	3.45608		10.423	8.052	20.885	7.976		0.759999
chr6	8561896	8562188	NM_001008622	13	+		5.14676	0.730375	6.37884	3.49147		10.423	8.052	20.885	7.976		0.760848
chr6	8632393	8632725	NM_001017673	6	-		11.1952	1.98498	8.2042	2.91291		11.088	2.842	7.297	4.76		0.97563
chr6	8688519	8688698	NM_001098189	22	-		3.9	17.5889	6.03333	3.71111		25.946	19.894	21.011	24.7		-0.790513
chr6	9197617	9197718	NM_001017767	6	-		2.40196	11.5588	5.96078	9.32353		53.666	40.261	20.759	25.6		-0.385344
chr6	9404098	9404221	NM_001030065	19	+		110.629	54	31.8952	42.6048		196.481	235.172	282.451	206.344		-0.687666
chr6	9881458	9881589	NM_001045297	9	+		126.273	106.864	65.2045	27.1364		109.328	231.383	134.746	103.687		0.382187
chr6	9863331	9863515	NM_213332	13	+		1.84324	0.140541	11.8973	6.48649		28.607	9	22.017	19.039		0.301533
chr6	9937300	9937476	NM_199646	6	-		6.28814	38.9209	107.463	21.5198		396.066	426.531	1148.68	508.784		0.954741
chr6	10664308	10664402	NM_214700	11	-		18.7368	54.1263	181.537	119.021		203.355	174.544	455.319	177.142		0.773448
chr6	10746477	10746736	NM_131761	4	-		107.677	34.6462	356.4	1010.72		463.703	149.677	177.019	474.951		0.511829
chr6	10782677	10783059	NM_212575	10	+		1.42298	0.707572	16.9164	15.9739		7.762	7.342	13.588	16.981		0.941421
chr6	10823227	10823302	NM_001002068	3	-		270.224	160.342	201.408	281.25		398.949	188.043	387.128	338.846		0.685936
chr6	10899515	10899688	NM_001083011	7	-		10.5575	4.52299	7.98851	5.85057		3.105	7.342	2.265	6.689		-0.848944
chr6	10984652	10984844	NM_213124	4	-		480.13	244.399	160.508	199.591		272.545	472.713	507.657	503.381		-0.992541
chr6	12933638	12933841	NM_001005992	13	-		46.8431	33.598	1.71569	6.28922		38.808	63.471	13.839	18.911		0.755057
chr6	12957804	12957948	NM_131510	10	+		4.09655	1.68276	0.351724	1.13103		70.742	44.05	12.456	6.947		0.92059
chr6	13142908	13143331	NM_001080588	10	+		17.7123	3.09198	3.36557	5.41509		13.749	7.105	9.688	12.221		0.788056
chr6	13116490	13116534	NM_001007765	19	+		47.0667	6.2	28	79.5111		151.019	148.256	241.059	698.79		0.837707
chr6	13115867	13116230	NM_199949	6	-		83.7527	24.3736	192.365	374.118		151.019	148.256	241.059	698.79		0.949803
chr6	13285558	13286035	NM_001089501	4	-		33.9268	12.636	8.3682	9.26151		24.837	15.394	22.646	12.221		0.625835
chr6	13416043	13416315	NM_200497	12	+		5.82051	0.956044	3.87179	1.08791		18.628	8.289	24.911	11.192		0.758882
chr6	13921006	13921129	NM_001005585	8	-		80.3306	18.2742	23.4113	43.0323		178.074	69.391	82.534	133.789		0.979647
chr6	14880880	14881036	NM_001045396	11	+		15.949	24.0892	17.7834	8.44586		38.586	22.973	41.267	36.406		-0.613802
chr6	15027334	15027521	NM_001159824	3	+		46.9734	2.94681	9.06915	0.925532		44.352	7.579	3.9	3.731		0.979586
chr6	16411141	16411277	NM_001129823	6	-		4.61314	42.8175	110.533	137.139		63.202	53.524	155.757	155.015		0.928601
chr6	16386577	16386953	NM_001083849	2	+		6.24403	32.4668	19.9045	10.0796		17.076	107.047	49.57	27.658		0.985383
chr6	18617932	18618269	NM_001007769	6	+		18.7101	1.51183	9.47929	4.64201		93.805	15.394	20.256	15.694		0.921847
chr6	19350201	19350338	NM_001080026	4	+		4.05797	0.144928	4.58696	0.876812		20.846	4.737	10.946	8.619		0.738185
chr6	19378993	19379188	NM_001111207	19	+		38.2296	58	25.4949	16.5408		105.558	146.124	112.226	47.341		0.876498
chr6	19292285	19292450	NM_199665	10	+		9.66265	4.63253	49.6747	25.9639		6.431	9.71	95.618	82.332		0.918914
chr6	19377860	19378460	NM_001082824	16	-		26.4077	7.79534	19.6023	18.4143		105.558	146.124	112.226	47.341		-0.450764
chr6	19509792	19510437	NM_200175	11	+		2.53406	1.71981	1.48762	0.470588		4.657	2.842	4.781	4.245		0.0595869
chr6	19550924	19551060	NM_001024415	5	-		24.854	14.1679	0.883212	1.80292		143.48	34.814	10.694	5.789		0.931968
chr6	19682031	19682329	NM_213364	11	+		193.271	183.806	105.308	53.0769		1069.11	1118.08	335.167	296.008		0.953076
chr6	19951350	19951544	NM_182866	7	+		164.677	178.021	41.3538	79.2667		321.997	777.514	244.204	397.636		0.667697
chr6	21587933	21588168	NM_001030063	18	-		163.572	21.0169	34.5	38.9195		104.228	87.627	76.117	59.819		0.723152
chr6	21709030	21709204	NM_001005933	14	+		7.54286	6.82286	5.02286	8.10286		5.322	5.921	6.542	3.988		-0.895924
chr6	23218368	23218565	NM_201578	11	-		50.7828	33.1515	81.1162	30.3889		328.872	351.456	294.026	196.824		0.20122
chr6	23368328	23368693	NM_001076748	8	+		6.54098	24.5792	54.1694	35.5601		21.289	104.679	125.813	120.667		0.879702
chr6	23830207	23830266	NM_001004000	17	-		18.4167	2.03333	6.85	3.61667		19.293	20.841	24.282	26.372		-0.592361
chr6	24010955	24011026	NM_200998	13	+		34.4583	14.1667	19.875	37.3472		41.026	35.761	36.36	40.137		0.963873
chr6	24053318	24053457	NM_001045847	11	-		0.435714	0.742857	1.8	1.8		5.101	3.079	7.549	3.345		0.303693
chr6	24021495	24021550	NM_200820	13	+		8.53571	2.60714	46.6786	34.125		61.871	30.551	158.525	289.833		0.748126
chr6	25687259	25687586	NM_212689	5	-		17.7622	11.7378	28.2957	25		301.152	116.52	258.169	174.44		0.424461
chr6	26603916	26603978	NM_201474	28	-		20.5556	14.3492	136.317	62.8254		373.446	612.206	547.037	596.262		0.212765
chr6	26816788	26817017	NM_001037110	5	-		247.409	57.0826	42.7783	58.0478		171.643	49.734	82.911	43.996		0.93351
chr6	26765635	26765891	NM_001005925	11	-		4.72374	5.57977	4.91829	6.47471		20.846	6.158	10.443	10.163		-0.554217
chr6	26983943	26984013	NM_001110383	13	+		10.5775	5.95775	3.11268	1.95775		15.745	9.473	15.098	11.449		0.37171
chr6	27604884	27604971	NM_200602	15	+		2.46591	4.29545	0.5	2.94318		49.896	38.366	32.334	30.231		0.197023
chr6	27700244	27700387	NM_001080177	11	+		4.90278	1.22917	18.6528	3.84028		21.954	50.208	19.879	15.437		-0.458104
chr6	28656760	28656852	NM_200487	18	-		0.956989	11.957	4.36559	4.49462		391.187	216.226	183.059	215.863		-0.570025
chr6	28675184	28675424	NM_200002	12	-		123.49	163.361	77.5934	64.4523		107.111	137.835	84.043	46.054		0.957224
chr6	28800408	28800489	NM_001002106	8	+		542.098	438.915	1005.29	2066.99		89.148	156.308	567.796	751.406		0.916912
chr6	28873205	28873700	NM_212650	10	-		5.23185	14.4879	24.4698	20.7238		66.307	29.367	118.013	68.052		0.542817
chr6	29001801	29002006	NM_001114914	9	+		4.33981	4.93204	10.1019	12.4175		4.879	8.526	30.321	25.471		0.919008
chr6	29125052	29125192	NM_001098386	21	+		5.04255	5.79433	12.5745	23.8794		5.322	3.789	23.401	81.303		0.987352
chr6	29116815	29116936	NM_001105596	6	+		144.893	12.6393	54.2623	192.049		82.273	15.157	39.883	76.028		0.943929
chr6	29100610	29100743	NM_173240	15	+		56.6045	20.8881	90.291	55.8358		60.541	91.653	107.696	77.057		0.309881
chr6	29420918	29420983	NM_001002681	10	+		3.90909	7.60606	9.60606	14.0152		52.114	27.709	94.36	108.318		0.75916
chr6	29407287	29407531	NM_001002708	6	+		31.2082	1.99592	6.31429	4.85306		219.766	68.207	13.588	14.022		0.923154
chr6	29504992	29505118	NM_194376	5	+		3.05512	25.0315	114.748	89.0551		15.08	17.052	388.134	207.888		0.9622
chr6	29827581	29827756	NM_199862	15	+		25.5568	23.8068	12.108	23.375		101.123	51.155	19.753	10.163		0.54872
chr6	30375530	30375807	NM_201006	11	-		11.0863	35.1835	47.446	21.6151		9.979	4.263	64.039	20.969		0.692244
chr6	30375530	30375784	NM_001002122	10	-		11.9451	38.3569	50.8863	23.3608		9.979	4.263	64.039	20.969		0.680375
chr6	31053649	31053716	NM_213299	6	-		14.6176	9.25	8.77941	12.9706		2.218	3.079	13.462	24.185		0.0344237
chr6	31717036	31717370	NM_201025	11	-		3.15522	6.29254	10.1522	23.2597		61.206	34.34	11.701	30.746		-0.435475
chr6	31737879	31738121	NM_001002120	13	-		50.4115	12.4897	6.93004	6.85185		39.03	35.051	21.011	9.906		0.720189
chr6	31779093	31779278	NM_001003784	14	-		26.5538	2.59677	14.2903	7.86022		51.227	52.813	40.512	23.67		0.252338
chr6	32103748	32103841	NM_199579	9	-		52.4894	16.4362	13.734	11.4255		65.198	99.469	66.555	55.059		-0.118727
chr6	32007014	32007083	NM_001002103	11	-		4.94286	1.65714	2.08571	1.28571		3.548	8.052	11.072	9.648		-0.870183
chr6	32774483	32774606	NM_001042687	22	+		53.4194	39.9274	11.4516	15.0403		109.107	108.705	28.685	27.658		0.959315
chr6	33234923	33235330	NM_201143	13	+		42.5882	15.1716	11.8848	2.33088		74.512	17.525	52.59	24.957		0.788869
chr6	33614249	33614365	NM_199782	15	-		1173.97	67.5128	138.205	160.726		1384.46	538.552	224.2	287.904		0.947113
chr6	33629384	33629559	NM_199933	19	+		167.688	7.28409	16.0795	4.76705		299.6	176.912	64.794	58.404		0.868682
chr6	33629108	33629341	NM_001003483	10	-		38.3162	33.2778	56.0726	30.8675		299.6	176.912	64.794	58.404		-0.248698
chr6	34384523	34384631	NM_199274	5	-		0.697248	3.83486	9.61468	12.1376		3.548	34.814	45.922	37.692		0.800442
chr6	34694724	34694804	NM_212621	10	+		15.7284	4.24691	3.44444	2.50617		56.327	38.13	54.603	28.173		0.626693
chr6	34693412	34694030	NM_001076659	9	-		7.96769	7.29079	12.5186	2.68982		56.327	38.13	54.603	28.173		0.834395
chr6	34886232	34886561	NM_214714	8	+		377.391	2067.28	1407.81	2390.2		2.439	3.552	7.046	3.216		0.0926085
chr6	34964336	34964498	NM_001003877	12	+		20.0798	1.84663	9.80982	0.607362		76.064	32.683	30.698	35.506		0.850792
chr6	36770203	36770424	NM_001020617	6	+		7.36937	1.03153	6.81982	2.72973		4.657	4.737	9.184	7.719		0.234436
chr6	36788141	36788337	NM_001013288	8	+		11.0305	22.4569	6.4467	10.5076		116.868	13.026	12.204	9.005		-0.138322
chr6	37249688	37249989	NM_213407	11	+		44.4801	160.632	36.8642	10.5695		136.161	160.097	153.618	48.37		0.627176
chr6	37473854	37474195	NM_213446	6	-		74.8216	128.003	12.2602	11.3772		69.855	44.998	2.642	1.801		0.76121
chr6	37461219	37461358	NM_201652	13	-		16.15	11.9429	40.9214	14.6786		25.059	181.412	109.709	93.524		-0.0536148
chr6	37370962	37371181	NM_212604	12	-		1.45	5.65909	60.9227	42.2591		4.213	9.236	242.191	99.184		0.959027
chr6	37572051	37572298	NM_001018141	24	+		13.125	0.145161	1.99597	6.07661		27.055	8.052	17.74	12.607		0.845907
chr6	37697789	37698059	NM_001006062	5	-		56.5978	0.804428	6.37638	4.57565		50.118	15.631	13.588	7.075		0.971354
chr6	38776560	38777183	NM_001008627	3	+		250.952	196.881	12.2772	2.48558		135.496	217.41	30.573	12.993		0.860749
chr6	38704269	38704383	NM_001007318	11	+		66.3652	2.98261	13.8087	14.9217		124.408	55.181	49.193	53.387		0.970624
chr6	38827149	38827259	NM_200006	4	+		131.505	7.38739	11.1351	5.57658		95.357	31.025	11.197	12.092		0.970386
chr6	39149274	39149394	NM_001075108	15	-		7.63636	3.64463	3.8843	3.40496		187.61	126.467	24.534	9.52		0.79376
chr6	39129477	39129776	NM_200051	4	-		12.6133	4.67	13.3	7.36667		16.632	17.762	21.64	15.309		0.483043
chr6	39452446	39452600	NM_199723	8	-		174.955	27.7806	41.4129	20.0452		54.332	133.572	27.05	20.84		-0.0720559
chr6	39597334	39597406	NM_001111195	6	-		9.49315	8.87671	74.7123	25.8082		63.202	49.734	49.57	55.96		-0.507081
chr6	39824301	39824366	NM_001005955	7	-		30.697	2.98485	10.6515	8.95455		83.382	51.392	131.601	103.687		0.0927489
chr6	39834115	39834202	NM_001080035	7	-		20.0795	12.2614	20.625	21.8182		113.098	40.735	37.996	27.787		0.106352
chr6	40002651	40002761	NM_153659	12	-		42.6306	29.3514	166.198	121.991		722.942	615.048	813.761	1218.89		0.568383
chr6	39994101	39994310	NM_001006051	3	-		15.8952	12.3476	1.44286	0.690476		57.658	9.947	2.768	1.544		0.809448
chr6	40365747	40365889	NM_001013488	11	-		15.1818	5.20979	6.74825	0.202797		128.622	74.128	38.751	8.876		0.926497
chr6	40385483	40385930	NM_001080684	3	-		10.5246	4.88839	8.10268	10.625		28.385	2.605	13.714	8.748		0.666838
chr6	40397621	40397691	NM_001003996	12	-		6.1831	7.04225	5.16901	3.01408		137.492	31.262	5.913	3.216		0.480691
chr6	40485494	40485723	NM_198375	10	+		190.048	157.17	43.8	58.3957		98.906	166.492	90.963	87.22		0.518903
chr6	40504228	40504397	NM_200758	4	+		20.9824	15.9	35.7294	79.2471		88.926	13.262	53.722	46.955		0.00580104
chr6	40513973	40514066	NM_001006032	4	-		27.1064	11.1489	14.8298	40.8298		24.394	19.183	9.688	29.073		0.814121
chr6	40582641	40582799	NM_001034178	4	-		88.6918	29.6604	47.8365	33.7673		50.783	40.735	18.243	11.449		0.609261
chr6	40699497	40699518	NM_205537	6	-		31.5909	4.72727	16.9545	2.36364		22.841	17.525	18.746	36.535		-0.347197
chr6	40762619	40763110	NM_001037436	7	-		3.33943	7.64634	6.62805	9.67886		184.727	138.309	110.716	59.047		-0.917253
chr6	40853535	40853826	NM_001013538	16	+		199.479	54.476	17.8733	27.5616		127.069	120.783	45.796	40.008		0.746195
chr6	40763525	40763786	NM_173835	11	+		177.744	23.126	70.9084	35.7863		184.727	138.309	110.716	59.047		0.732196
chr6	40959292	40959537	NM_001002200	8	-		47.7114	4.1626	21.3577	16.6382		56.993	10.421	15.727	11.964		0.948645
chr6	41016205	41016321	NM_001002053	7	-		78.0085	92.359	114.248	147.427		36.591	84.548	126.442	109.475		0.756991
chr6	41383941	41384290	NM_001166268	10	+		99.9486	59.1371	59.8971	65.7171		103.341	135.941	83.163	86.062		-0.0500037
chr6	41377436	41377612	NM_001004649	5	+		11.0734	3.9887	6.62147	3.76836		2.883	5.447	2.768	3.345		-0.574593
chr6	41434980	41435256	NM_001076617	3	+		128.733	16.8448	2.84838	5.45126		15.523	4.263	1.258	3.087		0.993628
chr6	42268284	42268405	NM_201341	45	-		8.04098	0.295082	2.53279	2.47541		32.377	4.5	16.104	17.753		0.974093
chr6	42319914	42319989	NM_201577	12	-		10.4605	4.10526	0.631579	2.23684		1209.49	415.637	286.226	160.675		0.960511
chr6	42308620	42308717	NM_213505	10	-		10.7041	1.96939	15.4388	6.20408		41.913	25.578	84.169	64.45		0.771627
chr6	42348995	42349575	NM_201470	5	-		7.12737	18.7625	30.4802	55.6489		45.018	18.71	33.466	68.696		0.661632
chr6	42880046	42880572	NM_201189	12	-		126.133	56.4782	20.2068	13.2163		333.307	374.665	372.911	188.848		0.341917
chr6	42902153	42902332	NM_205566	7	-		18.4278	1.37222	12.5111	9.79444		59.21	9	19.627	15.309		0.855863
chr6	43165699	43165946	NM_001006096	3	+		2.31452	0.403226	32.7782	7.43548		7.983	19.657	42.022	22.899		0.913929
chr6	43164902	43164984	NM_001002159	8	-		2.81928	0.915663	6.25301	0.783133		7.983	19.657	42.022	22.899		0.666166
chr6	44095090	44095403	NM_001110200	7	+		13.2134	6.20064	16.2611	24.1051		85.378	23.92	38.373	76.8		0.60181
chr6	44128648	44128772	NM_001110371	9	+		191.768	5.896	16.64	0.52		199.363	182.833	33.592	31.003		0.624246
chr6	45806174	45806210	NM_198915	25	-		17.1081	0.972973	25.5135	5.10811		45.239	49.498	69.323	18.653		0.657438
chr6	46369057	46369213	NM_205561	15	+		15.7771	26.7898	20.8599	49.1783		2.661	6.868	17.236	28.302		0.843639
chr6	46343750	46343865	NM_001003535	29	+		12.2328	15.8707	15.2759	19.681		110.437	191.359	150.85	124.913		0.139585
chr6	46672333	46672564	NM_199997	7	-		324.009	74.1724	17.9655	19.6034		148.137	284.907	35.102	28.302		0.308217
chr6	46679189	46679635	NM_198875	4	-		74.2662	21.2908	3.61298	15.7517		214.221	159.15	11.197	38.85		0.859281
chr6	48287917	48287992	NM_212697	9	-		70.3684	57.6579	26.9342	38.0658		89.148	129.309	122.291	129.415		-0.659112
chr6	48358362	48358433	NM_201150	5	-		15.3611	8.51389	42.5278	4.75		178.074	108.705	75.614	78.858		-0.245475
chr6	49503316	49503594	NM_205719	7	+		10.6129	6.42294	4.87814	2.92832		189.606	91.653	72.469	73.97		0.941941
chr6	49752683	49752798	NM_201190	15	-		63.3017	78.0862	28.0086	49.3448		371.672	311.432	123.926	124.655		0.79779
chr6	49693926	49694089	NM_001017688	12	+		131.695	91.4939	44.7744	88.7378		56.106	82.18	11.952	26.629		0.61043
chr6	49723283	49723424	NM_001006043	6	+		85.5282	23.6338	3.24648	16.6479		157.451	2.842	18.369	24.7		0.94843
chr6	49877780	49877917	NM_199218	10	+		58.1087	16.4638	95.1159	171.58		138.823	116.047	80.521	371.779		0.80742
chr6	49853178	49853465	NM_200195	5	+		206.833	98.2361	14.2986	10.3194		51.227	2.605	13.21	11.578		0.783788
chr6	49947446	49947524	NM_212675	9	+		53.3165	457.873	531.418	140.848		123.965	136.888	539.111	125.041		0.691134
chr6	50355920	50356066	NM_200797	3	-		30.4558	14.7551	62.1497	44.6667		561.278	380.113	721.414	732.881		0.918747
chr6	50332923	50333022	NM_001037393	7	+		35.29	61.58	73.62	147.41		74.955	56.366	160.16	264.362		0.927459
chr6	50403104	50403234	NM_001126109	3	+		2.30534	152.313	30.9466	32.458		9.314	105.626	28.182	31.26		0.99961
chr6	50344395	50344531	NM_201015	13	+		43.2482	9.24818	22.1387	18.6131		153.459	111.547	230.239	196.31		0.134133
chr6	50344395	50344531	NM_001033105	14	+		43.2482	9.24818	22.1387	18.6131		153.459	111.547	230.239	196.31		0.134133
chr6	50681922	50682052	NM_001184955	12	-		20.4809	4.26718	5.67176	1.45802		98.24	57.076	40.638	38.979		0.951153
chr6	51722353	51722402	NM_131493	3	-		444.2	182.02	86.08	123.2		129.509	180.228	46.048	85.805		0.451053
chr6	51761532	51761992	NM_001002547	7	-		32.82	2.30803	7.31453	4.32972		75.842	27.946	13.462	12.092		0.934322
chr6	52193073	52193090	NM_207098	3	+		5.61111	4.33333	18.3333	11.6667		3.992	9.71	21.137	18.782		0.882963
chr6	52186213	52186305	NM_001204124	4	+		4.69892	14.5699	65.5161	222.075		49.009	33.867	36.612	61.234		0.753968
chr6	52185247	52185731	NM_199638	8	-		21.8412	19.0082	10.7567	11.1608		49.009	33.867	36.612	61.234		-0.210867
chr6	52518041	52518199	NM_001076755	9	-		55.1384	30.2516	22.8428	25.8616		144.81	116.994	31.328	41.552		0.848502
chr6	52676210	52676478	NM_200357	4	-		17.1115	13.6803	18.1375	9.63941		125.295	113.679	37.115	38.464		0.251398
chr6	52628056	52628167	NM_001048149	4	-		11.3839	55.4018	70.7232	17.3839		396.066	598.47	601.514	442.147		0.974694
chr6	53000859	53000957	NM_199788	3	-		39.7172	24.4747	5.53535	1.77778		1310.39	264.776	59.132	41.295		0.908777
chr6	53229207	53229372	NM_001100138	10	+		4.01205	3.8253	29.0602	18.0422		43.909	56.602	59.384	54.287		0.631663
chr6	54109964	54110222	NM_001006034	5	+		9.0888	6.13514	6.64865	10.5174		7.096	6.394	27.553	28.044		0.297798
chr6	54303481	54303726	NM_001013542	6	-		67.9797	46.6789	32.4268	16.3415		143.701	267.144	152.486	98.155		0.372447
chr6	54389076	54389126	NM_173251	6	-		29.8039	18.451	15.6275	13.5882		554.403	629.021	364.104	302.183		0.626542
chr6	54531677	54531844	NM_001109724	13	+		16.3869	7.04762	14.3036	2.27976		24.616	22.973	36.612	20.068		0.64302
chr6	55271076	55271137	NM_001037691	7	-		26.6129	1.22581	9.85484	10.6935		324.437	103.021	174.755	197.982		0.997137
chr6	55305553	55305616	NM_200550	11	-		14.4844	3.53125	6.17188	3		88.261	105.153	82.534	54.931		0.225556
chr6	57435383	57435485	NM_205667	7	-		458.155	243.233	598.117	1163.18		40.804	84.312	82.911	89.15		0.359247
chr6	58425378	58425574	NM_001013289	6	+		114.599	82.9492	45.6244	49.4721		30.381	32.209	33.718	26.758		0.0406647
chr6	58601308	58601653	NM_207099	10	+		5.89017	0.0289017	13.2514	3.10405		9.314	5.921	22.395	14.537		0.874845
chr6	58734844	58734999	NM_201166	14	+		5.90385	60.8462	32.8205	152.212		48.787	27.709	65.8	114.75		0.765909
chr6	59360278	59360610	NM_001033751	5	-		143.351	23.9429	8.77477	11.7357		55.219	51.392	15.727	18.267		0.710245
chr6	59580422	59580829	NM_001080193	29	+		10.7819	5.82843	5.875	13.1495		29.494	42.156	8.178	13.122		-0.256209
chr6	59558998	59559283	NM_130941	18	+		525.549	428.318	116.706	294.052		89.148	205.805	75.614	131.602		0.359831
chr6	59713077	59713231	NM_001089365	11	-		36.4387	72.1419	28.129	39.1419		97.575	72.47	29.944	25.343		0.352799
chr6	59640324	59640568	NM_212938	12	+		5.95102	26.0367	94.6204	213.922		23.063	14.683	132.859	130.959		0.838458
chr6	59667687	59667732	NM_001020694	6	-		11.0652	39.6087	30.6522	15.0217		14.858	11.368	14.091	14.665		-0.885684
chr6	59768249	59768587	NM_001002580	4	-		9.76106	4.20354	0.20944	1.45133		4.435	4.5	1.636	6.046		0.274149
chr6	59776158	59776270	NM_199734	6	+		112.027	28.5752	21.2743	51.9292		179.183	100.416	33.97	42.324		0.826285
chr6	59789013	59789218	NM_001003640	9	+		264.684	34.6117	61.466	25.5388		325.989	108.231	39.505	38.593		0.953374
chr7	16798978	16799176	NM_001017638	10	-		4.81407	2.34171	3.07035	4.11558		20.846	6.158	16.733	12.221		0.763739
chr7	1071318	1071458	NM_001077212	26	-		21.8511	3.86525	3.39716	3.04255		66.972	132.388	32.963	38.979		0.0196289
chr7	11383159	11383198	NM_131674	20	+		41.55	30.65	22.45	30.85		4.879	7.579	32.711	32.547		-0.737769
chr7	26216267	26216451	NM_001005947	5	-		3.60541	18.5459	10.4108	22.6432		54.775	26.525	29.063	22.255		-0.89425
chr7	30402558	30402810	NM_001013568	16	+		154.897	25.498	12.004	3.63636		33.486	30.077	5.913	5.918		0.734311
chr7	35639811	35639955	NM_001017717	6	+		2.94483	0.289655	0.317241	0.531034		8.649	4.026	2.139	6.689		0.804253
chr7	60827236	60827356	NM_001122773	34	-		100.711	3.60331	7.85124	9.38843		54.775	19.42	29.692	41.552		0.833532
chr7	62891232	62891378	NM_200491	21	+		6.05442	2.06803	4.53061	1.85714		11.975	3.316	4.655	2.959		0.890651
chr7	7745292	7745347	NM_001083550	14	-		109.161	47.0357	62.1071	36.6964		119.308	189.227	66.807	72.555		0.0335453
chr7	7561473	7561587	NM_001105277	21	+		194.035	160.113	86.7304	67.6261		72.959	128.836	81.779	95.067		0.0389559
chr7	10089231	10089458	NM_001045334	6	+		34.7237	22.1272	25.7851	3.86842		155.676	128.836	91.215	65.608		0.850107
chr7	10106855	10107454	NM_212678	3	+		67.8483	16.625	19.37	14.17		40.804	38.13	27.176	24.828		0.685999
chr7	11729424	11730181	NM_200157	3	+		222.319	93.1517	35.2599	53.5884		63.424	70.812	36.612	42.195		0.652341
chr7	14409482	14409654	NM_001099248	15	+		15.4046	10.4855	1.23699	0.710983		56.327	32.683	1.636	1.415		0.995764
chr7	14869290	14869583	NM_001045106	16	+		13.8844	6.77211	5.66667	6.56803		51.005	44.524	64.039	78.472		-0.404542
chr7	16216010	16216092	NM_152969	21	+		7.59036	2.3494	3.62651	4.36145		43.909	73.417	51.961	42.195		-0.724458
chr7	17280339	17280448	NM_001008650	17	+		44.2182	3.59091	11.6455	15.0455		108.663	109.179	19.249	35.12		0.347245
chr7	17114213	17114418	NM_001017735	7	+		91.4563	16.5291	3.47573	17.7621		44.796	31.972	7.675	14.022		0.847173
chr7	19815583	19815910	NM_001127308	9	-		2.73476	2.18293	6.25305	15.497		4.657	2.368	25.666	40.394		0.948859
chr7	20543293	20543395	NM_001202493	53	-		43.3981	3.31068	1.87379	2.49515		128.622	125.283	29.692	37.049		0.618083
chr7	22134900	22135016	NM_131806	5	+		2	1.47009	28.5897	16.7521		3.992	4.737	179.536	173.283		0.937583
chr7	23977026	23977171	NM_212653	12	+		101.644	97.7329	134.822	190.925		109.107	207.226	229.861	321.351		0.869057
chr7	27775194	27775265	NM_001013352	8	+		16.0278	9.73611	1.19444	1.47222		36.591	38.366	12.833	13.636		0.913326
chr7	27657771	27657933	NM_001083842	11	-		69.4233	17.0798	18.5276	9.20859		59.432	87.154	25.163	18.653		0.309363
chr7	28959997	28960338	NM_001017815	6	+		19.5263	27.8363	35.1667	22.9912		18.85	19.42	73.475	64.836		0.549348
chr7	30061202	30061327	NM_205552	9	+		133.96	19.873	14.3413	16.2222		68.968	34.814	12.456	17.11		0.940574
chr7	33165403	33165495	NM_001118900	23	-		8.07527	1.32258	6.35484	2.60215		33.264	37.656	33.592	27.401		-0.0530011
chr7	35018198	35018273	NM_131780	20	-		67.7895	3.26316	22.3289	25.5132		52.336	40.024	81.779	103.558		-0.045901
chr7	35405495	35405850	NM_001114317	22	-		27.2669	8.67978	7.40449	2.53652		35.038	46.892	34.976	23.542		0.225021
chr7	40753571	40753701	NM_001013337	10	+		9.08397	0.625954	10.1527	3.0687		27.72	4.026	13.965	23.799		0.480514
chr7	43889851	43890010	NM_001007175	40	+		110.519	8.46875	28.6	24.7688		21.067	80.759	124.933	91.079		-0.816788
chr7	47573289	47573380	NM_001020749	7	+		51.9565	5.23913	6.88043	4.45652		201.359	38.366	29.44	16.209		0.995498
chr7	52277644	52277801	NM_212439	19	+		1.85443	49.6835	1.77848	13.8165		3.992	61.813	10.568	57.761		0.793835
chr7	54408592	54408828	NM_001135130	18	-		0.991561	3.69198	8.32489	12.2025		37.921	20.841	14.972	16.466		-0.817579
chr7	55569035	55569461	NM_173218	29	-		2.68618	0.0538642	11.3466	11.3162		17.741	14.92	110.842	102.4		0.984793
chr7	55101639	55101784	NM_200989	11	-		54.1575	43.8904	6.86986	22.589		13.971	23.683	6.794	16.852		0.604614
chr7	55106637	55106787	NM_001008635	12	+		29.1987	16.9801	2.01325	8.03974		55.219	44.998	26.169	38.464		0.975269
chr7	56069783	56069928	NM_001077575	13	-		34.0205	10.9315	8.52055	2.00685		36.591	23.446	2.642	4.888		0.88456
chr7	56896477	56896588	NM_001080641	14	-		19.375	7.58036	8.15179	10.7143		12.197	2.605	9.813	9.906		0.685984
chr7	60153094	60153528	NM_001006086	11	+		80.6207	11.0253	18.8437	4.7908		145.032	84.312	50.703	21.612		0.895734
chr7	61750693	61750988	NM_001201360	7	-		24.7061	6	5.53041	1.18581		119.751	101.837	29.189	20.326		0.771527
chr7	62723151	62723233	NM_001083551	11	+		33.4217	10.7952	6.42169	3.6747		5.988	28.42	46.425	25.729		-0.813446
chr7	71019499	71019763	NM_001128544	25	+		35.8377	9.36226	31.5623	7.55472		12.197	7.579	46.803	16.08		0.465127
chr7	72612431	72612500	NM_001177932	23	+		11.3571	4.72857	4.65714	6.78571		6.653	4.263	59.636	59.305		-0.400572
chr7	725431	725524	NM_200448	3	-		31.4894	3.29787	4.8617	6.56383		12.197	2.842	8.933	25.343		0.0879168
chr7	729300	729460	NM_205541	7	+		596.584	98.6708	107.217	158.286		107.776	198.227	85.176	79.759		-0.190106
chr7	677727	677786	NM_001001839	11	+		1.35	5.96667	6	6.75		3.105	5.447	16.733	14.665		0.716179
chr7	1598482	1598653	NM_001003868	2	+		177.512	794.703	295.256	389.256		335.081	390.77	518.855	289.19		0.0059985
chr7	1654539	1654828	NM_205559	13	+		400.869	24.6172	4.14828	0.637931		289.842	127.415	14.343	14.665		0.933184
chr7	4296489	4296581	NM_200993	9	-		278.763	243.892	11.8495	64.2258		128.4	92.127	22.143	48.37		0.974742
chr7	6218914	6218979	NM_153674	8	-		43.5758	33.7273	78.7727	108.03		61.871	141.624	131.727	170.324		0.610856
chr7	6748035	6748613	NM_001142586	1	+		1.96891	8.3696	0.262522	0.381693		678.812	1519.98	534.204	751.277		0.968869
chr7	6750339	6751011	NM_001024398	3	+		1.2422	3.43834	1.57058	2.10401		269.662	726.595	743.683	382.714		0.53371
chr7	7292642	7293938	NM_001020746	1	-		0.351581	30.1403	9.69391	7.9946		28.607	1330.75	747.583	1077.64		0.81727
chr7	7255938	7256320	NM_207100	1	+		2.56136	6.31332	3.63708	2.95822		58.545	182.596	93.228	91.723		0.98377
chr7	7281269	7281732	NM_001076749	1	-		0.327586	2.40517	1.10129	0.663793		11.753	51.155	20.759	19.425		0.983906
chr7	7559002	7559101	NM_213459	22	-		71.59	2.83	4.36	1.09		56.327	44.05	7.046	14.537		0.728593
chr7	7835605	7835645	NM_212808	6	+		32.122	36.0488	1.2439	0.829268		25.503	56.366	15.223	13.636		0.822315
chr7	8321714	8321789	NM_001045289	4	-		51.6184	24.6711	122.184	170.092		51.67	45.235	92.221	119.638		0.995555
chr7	8529937	8530260	NM_001077258	7	+		14.9228	40.7222	36.5	16.1605		44.131	83.601	62.278	38.207		0.939191
chr7	9121764	9121856	NM_001077154	15	-		2.68817	14.2473	3.29032	12.1398		6.431	8.289	6.416	31.132		0.516549
chr7	9518538	9518712	NM_001024426	6	-		22.76	4.30286	15.5486	5.64		362.136	112.731	164.312	125.299		0.911119
chr7	10071571	10071790	NM_001007383	9	+		700.864	851.264	145.441	241.445		655.527	964.136	232	148.326		0.966943
chr7	11466185	11466356	NM_205760	7	-		166.634	14.9477	13.8023	12.7151		288.512	66.076	36.989	25.085		0.991872
chr7	12201675	12201913	NM_001080704	5	-		3.33054	6.02929	56.159	34.1841		70.52	24.394	145.44	84.004		0.888886
chr7	13752129	13752339	NM_131585	5	+		179.82	407.891	928.403	877.697		139.71	213.621	127.575	218.308		0.0738164
chr7	13795652	13795706	NM_001100436	5	-		231.436	133.618	2769.09	3399.75		22.398	47.129	305.098	596.39		0.951332
chr7	14198630	14198703	NM_001159825	3	-		59.0811	29.8378	78.0946	33.8649		12.64	21.788	32.082	17.367		0.493533
chr7	14189670	14189791	NM_001082864	4	-		13.2951	11.1967	8.78689	17.1311		92.918	51.155	47.432	58.275		0.341429
chr7	14318731	14319087	NM_212923	14	+		111.765	73.3697	11.9552	9.33613		140.375	99.469	19.501	30.488		0.994753
chr7	14466821	14467105	NM_001004581	5	+		49.9825	15.4632	14.0807	12.207		48.122	82.891	30.321	35.634		0.0248008
chr7	14534966	14535839	NM_001003415	5	-		129.332	136.241	8.59611	3.99542		91.366	26.762	16.356	9.52		0.682627
chr7	14780448	14780759	NM_212583	4	-		29.3365	10.0224	6.76923	4.52244		50.783	41.445	17.236	9.648		0.840059
chr7	14692162	14692331	NM_200914	11	+		46.9941	9.20588	0.894118	2.68235		26.168	12.789	3.523	6.046		0.973488
chr7	15413475	15413746	NM_001002518	4	+		15	8.48162	27.4412	28.8787		89.592	28.42	47.18	55.445		0.104323
chr7	15413067	15413257	NM_001044797	6	-		11.2513	3.04188	32.0366	14.3979		89.592	28.42	47.18	55.445		0.0581926
chr7	17871549	17871742	NM_131681	6	+		10.0052	0.757732	3.24742	1.9433		46.348	21.078	7.046	7.075		0.830832
chr7	19062724	19062779	NM_001077177	8	-		7.03571	5.85714	2.28571	3.5		50.34	50.208	54.351	46.44		-0.245775
chr7	19062724	19062819	NM_001242938	8	-		4.45833	3.70833	1.33333	2.04167		50.34	50.208	54.351	46.44		-0.217157
chr7	19154526	19154906	NM_214695	18	+		276.472	163.958	78.2546	113.777		108.441	225.226	192.117	218.05		-0.781844
chr7	19200284	19200699	NM_001199722	11	+		42.3558	14.9231	9.15865	17.2668		180.957	80.759	43.028	51.2		0.966008
chr7	19193971	19194079	NM_130939	2	+		3748.38	87.3486	0.330275	0.385321		3417.56	956.32	1.258	2.187		0.966207
chr7	19347259	19347545	NM_201142	6	+		83.4599	127.728	50.9895	55.9861		160.999	187.096	71.21	100.985		0.93147
chr7	19870372	19870773	NM_001109707	11	-		8.06965	1.8607	4.41045	3.95274		4.435	3.316	3.9	5.532		0.33456
chr7	20279470	20279641	NM_001020645	14	-		58.593	8.37791	39.7442	50.9767		47.013	25.341	35.605	59.819		0.830342
chr7	20379180	20379426	NM_001110837	10	-		1.8664	0.0931174	1.14575	0.615385		3.326	4.5	2.39	3.731		-0.656951
chr7	20685911	20685988	NM_001017654	10	+		17.5897	3.55128	10.2179	4.26923		43.687	29.13	21.262	14.279		0.750016
chr7	20757651	20757774	NM_001082833	10	-		2.58065	3.60484	10.6694	36.5565		14.858	8.763	6.291	13.508		0.267269
chr7	20757651	20757770	NM_001105130	10	-		2.66667	3.725	11.025	37.775		14.858	8.763	6.291	13.508		0.267269
chr7	20896274	20896341	NM_001076630	16	+		1.23529	1.08824	0.529412	0.955882		26.168	26.051	6.039	6.432		0.804487
chr7	21097795	21098069	NM_001171587	5	-		3.40727	3.40364	0.727273	0.625455		9.092	6.394	5.158	2.058		0.829674
chr7	21008520	21008563	NM_213518	17	+		19.4091	33.1364	9.90909	6.47727		27.72	25.341	28.434	16.595		0.392825
chr7	20993164	20993724	NM_001114744	4	+		7.43316	33.8271	7.43137	5.08021		3.548	32.446	5.158	8.49		0.973327
chr7	21080703	21080847	NM_001020489	5	-		9.88276	1.14483	3.37241	2.8		19.515	21.552	17.74	22.641		-0.377818
chr7	21456032	21456199	NM_212611	21	+		15.0357	3.19643	23.5476	8.68452		30.825	22.262	54.226	72.169		0.292419
chr7	21418044	21418284	NM_212648	15	+		80.083	40.1577	36.3195	29.4108		92.031	124.336	114.742	100.985		-0.599512
chr7	21966191	21966393	NM_131630	12	-		12.7833	2.7734	23.532	22.7192		10.423	4.973	20.256	30.874		0.889334
chr7	23055343	23055548	NM_212780	11	-		51.3107	50.9175	25.3932	22.1602		31.49	47.366	19.501	16.724		0.880818
chr7	23055830	23055904	NM_001006004	2	+		6.42667	61.52	12.7067	57.96		31.49	47.366	19.501	16.724		0.283437
chr7	23086333	23087352	NM_001089530	1	+		6.51765	3.7598	10.5794	6.1902		20.846	4.026	10.191	7.461		0.283611
chr7	23380503	23380640	NM_001017620	3	-		2.27536	5.41304	4.97101	7.76812		92.253	48.077	10.443	22.77		-0.767071
chr7	23959225	23959245	NM_213317	4	+		8.42857	1.2381	4.09524	1.57143		26.168	64.181	23.275	23.156		-0.464157
chr7	23963819	23964407	NM_199677	4	+		267.988	142.087	170.246	119.088		39.474	94.495	46.677	33.319		-0.272437
chr7	23885822	23885936	NM_200211	17	+		123.139	29.4087	108.217	138.922		33.042	50.918	18.495	85.291		0.156171
chr7	23968558	23968645	NM_199705	4	+		16.4091	1.625	8.78409	4.82955		75.842	31.262	74.482	83.232		0.567467
chr7	24149052	24149166	NM_001076719	12	+		8.8087	109.896	10.6522	31.3043		63.867	58.023	45.796	42.066		0.21856
chr7	24663091	24663302	NM_001020521	7	+		11.467	6.69811	1.13208	2.91509		33.264	47.366	10.191	9.906		0.711914
chr7	25061671	25061776	NM_001020624	6	-		45.6038	35.7075	145.887	153.811		237.506	87.154	138.143	149.355		-0.104631
chr7	25173991	25174761	NM_001130784	2	+		95.4436	9.14008	23.5123	37.8003		100.014	64.418	103.167	165.95		0.177869
chr7	25190806	25191062	NM_001080027	10	+		5.87549	3.45525	5.03113	3.89494		100.014	16.578	12.833	10.291		0.781486
chr7	25372121	25372287	NM_201321	4	+		8.88024	245.234	58.988	115.832		151.685	72.944	90.208	70.625		-0.742413
chr7	25557859	25557922	NM_001008651	9	-		33.125	0.359375	15.5156	8.40625		75.621	31.025	69.826	76.028		0.679922
chr7	25661336	25661617	NM_001173501	11	+		9.45745	16.4184	17.1135	9.02482		50.34	60.392	12.456	11.063		0.104634
chr7	25811492	25811591	NM_001002608	9	-		7.14	11.46	4.07	12.9		34.595	7.342	5.913	10.677		-0.168602
chr7	25995999	25996143	NM_001020777	3	+		0.993103	2.26207	1.46207	6.68276		19.071	12.552	56.742	42.71		0.261817
chr7	26048831	26048947	NM_001012366	13	+		238.462	30.9744	39.812	51.7436		136.161	83.127	35.983	44.768		0.86315
chr7	25995887	25995960	NM_001002500	7	-		23.6216	20.7973	22.4324	24.3649		19.071	12.552	56.742	42.71		0.374458
chr7	26161314	26161593	NM_205638	13	-		108.357	14.9357	82.7571	42.5107		30.16	29.13	71.839	55.059		0.162612
chr7	26182363	26182676	NM_001015059	5	+		28.7134	12.9427	18.4363	14.379		23.507	6.394	14.343	12.221		0.965922
chr7	26182266	26182676	NM_001080062	3	+		27.2774	15.5085	15.6642	14.5158		23.507	6.394	14.343	12.221		0.872501
chr7	26302832	26302986	NM_001076730	6	+		53.7935	22.8968	6.70968	17.3032		58.767	56.602	63.41	59.305		-0.492864
chr7	26300859	26300905	NM_131579	4	-		75.6596	3.6383	5.06383	2.59574		74.955	25.814	11.197	7.847		0.968049
chr7	26293771	26293965	NM_001006056	2	+		21.2256	22.8256	2.15385	0.374359		72.738	53.05	3.397	2.959		0.958628
chr7	27174908	27175196	NM_001045405	3	-		24.955	1.19031	36.7855	39.0657		30.381	14.21	68.317	68.052		0.937686
chr7	27202190	27202386	NM_001002422	5	-		8.30964	10.6142	49.2792	22.8832		8.427	24.394	47.809	45.282		0.81392
chr7	27388907	27389001	NM_200309	5	-		160.516	44.8	45.8737	52.7158		324.88	475.555	122.668	144.981		0.198341
chr7	27592713	27592847	NM_001002130	7	+		9.17037	10.1111	16.1704	32.6815		23.285	35.525	26.547	50.3		0.849289
chr7	27643892	27643957	NM_198366	11	-		16.9697	1.39394	3.9697	3.9697		917.205	1001.79	1046.39	1417.39		-0.445524
chr7	27622922	27623815	NM_131702	2	-		209.113	81.953	99.7796	162.338		300.043	183.307	142.169	214.448		0.903039
chr7	27729174	27729338	NM_212866	9	-		88.0121	33.6	35.297	42.5273		124.63	100.416	79.766	194.251		0.139536
chr7	27752914	27753121	NM_199844	6	-		24.2981	10.9135	11.5	3.64904		62.315	46.656	15.852	14.665		0.829825
chr7	27970141	27970293	NM_001008400	15	+		9.32026	3.81699	24.0196	25.6797		4.657	12.315	34.347	47.469		0.910703
chr7	28167233	28167266	NM_001002079	6	+		158.088	183.647	1455.56	2872.06		27.942	47.603	234.894	492.704		0.998604
chr7	28124092	28124229	NM_001003484	18	+		23.6304	5.0942	25.8696	19		35.26	111.784	179.913	79.887		0.0525727
chr7	28928390	28928437	NM_001002013	22	+		28.1458	39.2083	37.8333	62.5208		123.078	133.099	134.117	237.733		0.96781
chr7	29901216	29901486	NM_199732	5	-		44.9668	14.1218	16.2066	33.0185		103.563	18.473	40.512	43.867		0.897121
chr7	29947207	29947400	NM_001014813	23	-		3.76289	3.44845	31.1082	29.6804		4.213	6.631	71.21	51.715		0.978652
chr7	29948954	29949285	NM_001007344	5	+		74.8283	8.31627	35.9578	48.6958		271.436	46.656	45.67	55.188		0.807986
chr7	30360793	30360943	NM_001039823	19	+		7.40397	9.70199	8.09934	7.4702		27.498	17.052	12.456	23.284		-0.563993
chr7	30377977	30379395	NM_213102	1	-		35.8154	49.4207	34.043	49.4447		5.766	36.946	8.807	8.619		0.599236
chr7	30381394	30381725	NM_001077746	4	+		16	7.11747	10.8825	9.83434		18.184	4.026	7.8	8.362		0.982844
chr7	30417191	30417379	NM_001130793	13	+		6.8254	1.72487	2.50265	1.80423		17.297	5.684	8.681	7.847		0.986469
chr7	30513738	30514081	NM_200115	6	+		165.765	40.7093	45.7442	53.4186		129.952	194.201	134.62	116.937		-0.346978
chr7	30500298	30501313	NM_001020486	1	-		121.258	56.6378	111.16	118.781		85.156	49.261	118.516	90.822		0.778547
chr7	30432711	30432922	NM_199689	13	+		1.13208	5.70283	15.5566	10.5708		59.21	18.473	23.275	17.11		-0.691724
chr7	30638035	30638272	NM_001099259	8	+		9.7479	7.2437	10.2563	12.9118		11.088	4.737	12.959	12.607		0.84423
chr7	30692395	30692570	NM_001020605	4	-		219.869	149.17	21.6705	29.8239		652.2	195.385	97.128	71.526		0.895481
chr7	31200055	31200142	NM_201193	58	+		3.45455	1.29545	3.95455	3.625		42.135	77.917	43.657	62.006		-0.843712
chr7	31299085	31299216	NM_001030106	7	+		110.955	22.8182	33.6439	43.1136		175.413	112.021	105.809	148.84		0.888921
chr7	31538118	31538254	NM_001198567	15	+		33.9343	3.26277	2.94891	1.54745		92.696	25.104	19.879	22.513		0.997512
chr7	31617349	31617439	NM_001160335	3	-		452.945	234.923	299.253	419.571		319.336	254.829	397.445	320.322		0.196164
chr7	31828369	31828538	NM_001159314	16	-		77.9353	17.3647	11.9824	11.3882		64.976	90.706	43.531	44.382		0.204135
chr7	31963005	31963095	NM_199430	8	+		1459.92	173.055	12.3846	14.8242		822.291	336.299	24.156	25.986		0.957442
chr7	31896750	31896958	NM_213333	20	-		110.335	138.756	46.1675	41.2488		103.784	259.803	173.245	85.805		0.583541
chr7	32061980	32062323	NM_001077597	16	+		17.2209	3.53198	3.59302	1.9564		21.067	18.946	9.688	11.707		0.709384
chr7	32260366	32260519	NM_001172419	9	-		1.42857	1.11039	3.2987	5.47403		26.833	4.973	11.197	15.566		0.00666356
chr7	32760523	32760597	NM_213502	8	+		60.9467	90.4133	27.36	5.10667		188.941	147.308	202.685	57.504		0.443272
chr7	32708928	32709025	NM_001089326	13	+		89.6633	45.3265	21.6837	37.0408		115.316	132.151	44.035	63.035		0.668833
chr7	33129295	33129338	NM_001007453	14	-		4.34091	2.86364	1.95455	1.47727		20.624	7.579	13.714	13.508		0.526207
chr7	33255997	33256101	NM_001004672	6	-		30.8095	19.6667	32.1333	10.0571		213.334	282.302	109.458	109.09		0.0734184
chr7	33355209	33355300	NM_200239	18	-		10.1957	4.25	7.42391	3.52174		34.373	26.288	20.13	22.899		0.598494
chr7	33963780	33963931	NM_001080753	5	-		130.151	2.42763	48.7566	20.1579		118.864	56.129	88.698	57.889		0.973438
chr7	34028399	34028554	NM_001005306	10	+		16.5128	10.3462	6.5641	5.44231		294.056	152.519	102.79	60.977		0.993479
chr7	33964269	33964361	NM_001005307	11	+		3.95699	7.32258	4.41935	3.35484		118.864	56.129	88.698	57.889		-0.409855
chr7	34232248	34232271	NM_001045848	4	+		8.16667	7.66667	1.25	4.04167		163.438	24.63	24.785	18.01		0.592187
chr7	34464955	34465062	NM_199433	10	-		14.9444	9.16667	3.57407	0.462963		16.41	17.052	11.826	1.93		0.840775
chr7	34684371	34684512	NM_199986	7	-		71.1338	463.958	389.563	516.282		95.357	370.876	613.34	373.837		0.687926
chr7	35599357	35599609	NM_001110458	17	-		3.19763	8.36759	2.86166	2.53755		9.757	10.657	6.794	6.947		0.77369
chr7	35579503	35579603	NM_001003452	8	+		57.0297	61.6832	10.8911	3.08911		340.847	242.514	57.623	30.488		0.943919
chr7	36418434	36420332	NM_001077332	1	+		24.4892	29.4271	21.8526	12.5292		25.946	8.763	6.668	4.76		0.386407
chr7	36541075	36541268	NM_199620	8	+		9.23711	2.90206	11.4948	14.5309		70.077	4.026	14.72	23.799		0.231212
chr7	37794761	37794877	NM_200105	10	+		282.47	177.282	18.4957	65.641		329.981	354.061	94.234	71.397		0.879726
chr7	39134397	39134527	NM_213366	17	+		48.4427	61.9466	57.626	22.6336		100.458	146.598	80.646	45.926		0.822844
chr7	39311283	39311493	NM_200889	15	-		2.6872	11.564	18.455	7.94787		162.551	87.39	32.586	26.886		-0.704945
chr7	39481805	39481895	NM_131886	3	+		48.044	25.7253	20.5055	19.2967		464.59	158.676	104.677	82.332		0.999368
chr7	39652567	39652636	NM_001017874	6	+		235.186	33.9714	18.1571	9.62857		225.753	151.098	22.772	19.039		0.846106
chr7	39657464	39657547	NM_001204123	19	+		32.1429	7.63095	5.67857	2.53571		49.675	23.446	21.64	20.84		0.996328
chr7	39741812	39741966	NM_201178	15	+		104.832	16.8581	1.14839	6.83226		107.998	60.392	17.866	18.01		0.934812
chr7	39962882	39962911	NM_131613	15	-		330.633	38.7667	81.7333	90.1667		164.769	144.94	248.104	221.652		-0.268349
chr7	40106554	40106659	NM_001020702	11	-		6.29245	1.78302	5.25472	1.4717		3.548	22.262	5.787	11.578		-0.823805
chr7	39980984	39981051	NM_001017755	7	+		54.3824	26.6912	55.7941	142.853		46.792	14.92	44.035	63.293		0.861201
chr7	40059215	40059348	NM_131382	13	+		282.851	39.5597	32.8731	63.6045		118.199	90.943	44.915	49.528		0.786746
chr7	40072184	40072321	NM_001002064	11	+		17.2681	21.5	10.2029	11.6014		262.344	273.065	145.063	135.075		0.94786
chr7	40199737	40199926	NM_200433	17	-		9.12105	24.2158	24.1263	19.3947		73.403	57.787	36.612	30.103		-0.630889
chr7	40200168	40200194	NM_001003734	3	+		21.5556	0.518519	5.18519	0.777778		73.403	57.787	36.612	30.103		0.741015
chr7	41131230	41131566	NM_001024443	2	+		25.4332	16.822	5.51632	6.21068		8.649	10.894	9.436	6.561		0.318678
chr7	41129943	41131186	NM_001128698	2	-		6.61897	19.0884	4.69534	0.976688		8.649	10.894	9.436	6.561		0.87154
chr7	41144163	41144255	NM_001037384	4	-		18.7527	38.9677	36.2043	47.3441		246.155	131.678	108.829	117.709		-0.902578
chr7	41056950	41057033	NM_001099238	5	+		120.214	0.309524	18.4286	14.5833		24.837	27.235	19.375	27.787		-0.0826831
chr7	41476367	41476847	NM_001030239	8	+		217.046	257.333	54.8586	48.8732		476.565	574.55	180.92	194.123		0.997538
chr7	41598135	41598328	NM_001089492	27	+		2.34536	0.278351	4.89175	4.04124		17.741	8.052	20.508	39.365		0.696176
chr7	42023274	42023338	NM_200473	25	-		5.10769	0.353846	1.76923	2.47692		100.901	75.786	31.831	29.845		0.451976
chr7	41971162	41971406	NM_200305	8	-		40.6857	42.2857	4.66122	6.7551		137.492	70.575	18.998	20.068		0.856205
chr7	42254409	42254717	NM_199843	13	-		263.583	43.2848	7.97411	4.40453		600.086	214.095	142.169	59.176		0.987879
chr7	43744206	43744365	NM_199869	6	-		5.0875	2.58125	4.43125	3.2		16.189	14.683	16.104	42.71		-0.318531
chr7	43876307	43876326	NM_001002121	11	+		79	18.2	74.6	68.75		151.241	213.147	206.586	262.818		-0.215565
chr7	44070322	44070512	NM_200169	6	+		10.4764	19.0366	13.6178	19.2932		12.862	12.078	15.223	12.736		-0.441579
chr7	44052062	44052097	NM_001089397	7	+		2.30556	5.69444	9.13889	9.5		89.592	33.156	67.562	37.307		-0.551496
chr7	44542139	44542246	NM_212671	7	+		198.13	10.7315	22.2685	12.0556		167.208	129.546	159.657	151.156		0.660803
chr7	44455747	44456054	NM_199824	6	-		176.776	83.8214	76.1006	89.4188		225.753	192.543	79.892	91.465		0.728233
chr7	44541664	44541983	NM_001025517	17	-		5.64687	3.8	1.4375	1.8125		167.208	129.546	159.657	151.156		0.119935
chr7	44646157	44646516	NM_213493	9	-		12.2833	17.15	32.2111	5.68333		136.827	181.412	101.657	59.305		0.1923
chr7	44617409	44617537	NM_001098757	11	+		653.93	142.651	14.5039	36.0155		74.068	124.81	7.926	19.94		0.393734
chr7	44610591	44610814	NM_001002512	4	-		68.4643	14.9598	28.4062	20.6161		135.053	57.787	55.358	32.804		0.942482
chr7	45592273	45592487	NM_001002743	9	-		28.5907	0.851163	3.82791	3.2093		73.625	7.579	10.443	11.449		0.998384
chr7	45692720	45692822	NM_001017669	13	-		39.8544	7.25243	8.54369	9.79612		57.658	24.867	32.46	41.938		0.900061
chr7	45782147	45782260	NM_200499	20	-		0.780702	1.92105	6.89474	7.5		39.03	10.421	18.998	26.372		-0.209413
chr7	45958688	45958886	NM_001002449	5	-		32.2864	37.4673	37.8342	73.5176		47.679	40.498	17.74	18.139		-0.633587
chr7	46455554	46455804	NM_001103194	2	+		296	92.1036	270.928	572.036		6.209	4.5	18.243	24.7		0.83461
chr7	47629592	47629746	NM_130995	12	+		1016.51	203.548	16.8968	8.76129		341.512	601.312	23.024	21.226		0.404407
chr7	49720130	49720417	NM_200259	8	-		59.6597	95.4514	3.79514	6.34375		490.314	223.331	4.655	7.075		0.675201
chr7	49754829	49754964	NM_001013519	4	+		15.9044	4.375	9.67647	6.74265		83.161	65.365	17.614	19.425		0.420647
chr7	50261686	50262169	NM_001044776	10	-		6.68802	14.9587	1.34091	2.94628		8.87	2.368	14.091	21.869		-0.850464
chr7	50261709	50261787	NM_001014299	11	-		6.13924	17.9367	0.227848	2.29114		8.87	2.368	14.091	21.869		-0.835062
chr7	51108024	51108190	NM_001020629	6	-		47.3293	77.7844	24.6347	27.8084		17.297	2.368	11.072	13.25		-0.66792
chr7	51729595	51729859	NM_199613	11	-		134.875	20.1887	8.77736	10.7396		117.534	49.024	16.985	14.151		0.967329
chr7	51867312	51867479	NM_001127470	4	-		262.946	861.75	233.554	123.696		79.834	105.626	202.182	75.256		-0.0499665
chr7	51856653	51856840	NM_201017	8	+		27.8723	36.7553	20.3351	4.45745		77.838	107.047	67.059	11.578		0.992457
chr7	51852843	51853156	NM_001017835	4	+		36.8089	8.60191	14.4522	20.3726		37.478	9.71	23.15	21.355		0.94739
chr7	53103688	53103929	NM_001114891	2	-		1.42975	1.78512	4.62397	6.07851		17.076	24.867	12.078	30.617		0.294076
chr7	53164952	53165174	NM_213431	11	-		32.2556	6.86099	21.1883	11.7085		34.595	38.13	41.896	46.698		-0.529146
chr7	53094810	53094820	NM_001005589	7	-		1.81818	7.27273	47	106.364		30.603	20.367	84.547	98.669		0.918377
chr7	53229743	53229886	NM_199989	10	+		28.9931	82.3125	27.4236	147.444		69.855	39.787	9.939	45.025		0.104041
chr7	53609302	53609498	NM_207100	6	+		1.22335	8.8731	17.5482	25.3299		21.289	18.236	54.1	36.535		0.656393
chr7	54208152	54208672	NM_001077542	9	+		5.95777	1.30134	3.84261	1.64875		30.603	10.184	5.284	4.888		0.780291
chr7	54342780	54342841	NM_001080170	28	+		52.4677	19.6774	21.0806	16.0806		11.753	102.547	75.111	75.642		-0.926269
chr7	54408859	54408911	NM_001006085	4	+		17.8679	14.4906	7.0566	12.0189		37.921	20.841	14.972	16.466		0.856343
chr7	54577311	54577788	NM_131025	5	+		1.10251	270.653	191.439	162.929		3.77	1176.34	403.987	318.006		0.885989
chr7	54603459	54603566	NM_001083552	5	-		29.4444	24.537	4.55556	21.4537		17.076	6.394	15.475	15.823		-0.160628
chr7	54779253	54779489	NM_001076585	6	-		16.8565	52.5063	29.7932	44.4641		18.184	16.815	18.369	10.034		-0.50133
chr7	55225595	55225604	NM_200845	5	+		4.5	0.9	3.6	13.5		5.766	9.473	31.453	29.974		0.549584
chr7	55910340	55910717	NM_001128270	2	-		9.89153	9.97354	27.4021	15.9524		86.265	222.384	159.531	127.743		0.0437478
chr7	56206924	56207081	NM_131820	16	+		293.228	93.0443	27.5253	7.79747		159.668	164.123	66.807	52.744		0.759573
chr7	56556360	56556445	NM_001003560	15	+		48.907	63.4302	12.2209	9		82.052	27.472	19.124	13.379		0.534907
chr7	56802893	56802991	NM_200668	7	-		5.73737	1.47475	18.899	12.4949		79.391	23.209	27.427	34.219		-0.251006
chr7	57735857	57735929	NM_212585	10	+		111.466	4.84932	17.1918	11.1233		179.183	127.888	38.121	101.628		0.700522
chr7	57966516	57966635	NM_205542	7	+		7.83333	1.48333	3.86667	19.4833		23.063	9.71	25.414	22.899		0.45212
chr7	57966516	57966635	NM_001204272	7	+		7.83333	1.48333	3.86667	19.4833		23.063	9.71	25.414	22.899		0.45212
chr7	58029260	58030230	NM_131240	12	-		120.593	23.3666	17.104	19.0762		58.767	47.129	32.837	39.751		0.87599
chr7	58352182	58352309	NM_201194	10	+		142.594	12.9219	2.99219	2.0625		685.021	401.664	34.85	30.36		0.872825
chr7	58352184	58352309	NM_199906	10	+		144.778	13.127	3.03968	2.09524		685.021	401.664	34.85	30.36		0.872845
chr7	58754241	58754398	NM_001080174	8	-		2.26582	0.721519	3.39241	1.18987		16.854	6.394	8.052	2.959		0.416452
chr7	58882547	58882720	NM_001017739	5	-		296.724	103.42	104.92	95.7989		113.32	42.156	35.102	29.845		0.994643
chr7	59990970	59991030	NM_213204	4	+		967.574	341.098	4460.21	5905.69		21.954	47.84	229.106	473.536		0.951222
chr7	60125196	60125220	NM_201122	5	+		14.24	13.4	38.08	31.4		48.566	45.235	416.694	437.516		0.965974
chr7	60632123	60632156	NM_173248	11	-		18.1765	14.8235	51.2353	30.5882		251.034	286.801	214.009	270.408		-0.835753
chr7	61759890	61760071	NM_001005985	9	-		5.0989	7.18681	23.0659	6.20879		157.894	91.416	161.544	54.416		0.518559
chr7	62646260	62646474	NM_212690	14	-		15.2465	5.69767	11.9953	20.4651		90.479	76.259	50.829	62.392		-0.11693
chr7	65359532	65359675	NM_001017616	8	+		12.7292	1.72222	3.09028	4.84028		48.122	13.262	35.354	24.7		0.839908
chr7	65358898	65359023	NM_001003435	5	-		32.6667	47.7143	50.6825	74.2222		48.122	13.262	35.354	24.7		-0.524461
chr7	65569716	65570091	NM_200380	8	-		2.125	5.82713	8.59574	4.68617		124.408	67.497	71.839	44.511		-0.561491
chr7	65681041	65681464	NM_001079974	16	-		44.658	2.84906	8.37264	1.3066		138.601	55.655	32.586	29.717		0.955818
chr7	65684968	65685119	NM_200269	4	+		34.2237	80.0461	163.026	187.461		32.155	26.288	79.766	49.013		0.70888
chr7	65728514	65728799	NM_213088	5	+		9.13636	2.24126	0.195804	0.451049		29.494	3.316	2.894	3.087		0.978668
chr7	66330538	66330838	NM_001077722	24	+		40.2292	9.49502	8.65781	2.95017		5.766	2.842	4.278	2.187		0.8859
chr7	66830113	66830200	NM_198825	6	-		17.7614	19.4091	2.29545	5.17045		235.732	359.745	96.625	130.959		0.934492
chr7	66974813	66975055	NM_001079987	8	-		15.3663	7.35391	3.22222	7.23457		5.988	4.973	10.946	10.677		-0.614454
chr7	66982904	66983067	NM_200905	25	+		128.409	46.5244	107.244	128.274		30.381	72.47	122.92	102.529		-0.0172922
chr7	67347695	67347861	NM_001014289	21	-		58.9222	369.497	27.8204	54.1018		201.359	310.958	95.115	86.191		0.889065
chr7	69150295	69150417	NM_001007441	16	-		3.92683	5.26016	18.3984	11.5203		44.574	52.576	60.768	56.088		0.908816
chr7	69483427	69483469	NM_001002386	15	+		57.6279	111.256	297.791	381.163		147.693	125.046	88.698	80.402		-0.981967
chr7	69803229	69803384	NM_200876	27	+		5.69872	3.41026	1.5641	0.487179		51.449	145.651	69.952	24.957		0.272394
chr7	69787762	69788087	NM_212876	5	+		23.0215	35.911	60.9479	76.046		36.147	36.235	222.312	138.034		0.771115
chr7	72154124	72154348	NM_001080067	8	+		6.81333	1.23556	5.65778	4.87111		14.193	5.447	22.017	15.18		0.772821
chr7	72166992	72167378	NM_001007440	8	+		28.7649	4.80103	10.8527	14.5659		29.494	14.447	3.774	5.789		0.711297
chr7	73888194	73888357	NM_001115141	14	-		92.7927	39.3659	133.03	134.951		15.08	33.156	53.722	89.278		0.646103
chr7	74427739	74427774	NM_214699	4	+		252.972	26.5	123.75	120.222		237.95	289.643	261.818	343.606		-0.527353
chr7	74847948	74848089	NM_207061	7	+		54.8662	15.9859	13.4507	30.4507		118.864	53.997	21.137	29.588		0.855513
chr7	75143567	75143821	NM_200154	11	-		28.7961	11.5294	10.4588	14.1686		3.105	7.105	6.039	7.204		-0.905955
chr7	75191965	75192157	NM_001082921	3	+		20.943	22.8653	23.5907	10.0518		2.218	36.472	37.87	14.022		0.486754
chr7	75223008	75223307	NM_131760	7	+		453.15	67.7233	52.5633	67.4267		281.193	116.994	74.859	65.737		0.977156
chr7	75472023	75472232	NM_001013341	6	+		9.17143	18.8714	60.7143	61.6619		8.427	37.419	110.087	161.833		0.956426
chr7	75462927	75463243	NM_001002436	6	+		5.11672	15.5584	43.3123	20.2681		56.771	19.42	47.18	44.253		0.00287419
chr7	75722635	75722772	NM_001077468	7	+		10.1449	2.78261	16.6739	22.1159		21.511	5.21	9.688	9.262		0.0488951
chr7	76828835	76830274	NM_001109836	1	+		0.628472	0.475	0.139583	0.633333		278.976	715.938	320.069	524.479		0.20948
chr8	9405759	9406526	NM_001075110	9	+		12.0039	10.6289	16.5859	26.1914		10.866	11.605	8.807	14.794		0.647159
chr8	53571131	53571312	NM_001040037	20	-		48.2582	9.24725	15.7912	5.76374		11.31	35.051	35.605	41.423		-0.986757
chr8	1335646	1335851	NM_200179	16	-		68.1699	19.8641	26.5825	20.8252		149.024	116.284	61.774	70.111		0.749575
chr8	4902894	4902999	NM_200459	9	-		10.4811	4.07547	16.8113	9.07547		34.373	22.736	85.553	106.131		0.537999
chr8	4969811	4969920	NM_001002451	12	+		28.8636	15.9091	13.5182	17.5909		595.207	92.127	87.566	91.208		0.970905
chr8	8274156	8274329	NM_200599	15	-		15.1897	13.908	4.95977	3.7069		44.131	40.024	31.453	25.729		0.972928
chr8	10115171	10115210	NM_001098489	32	-		10.5	2.45	18.525	6.175		23.507	49.261	75.614	60.591		0.384998
chr8	9518257	9518345	NM_200092	8	+		35.5955	47.9888	23.5169	33.6629		119.751	103.968	223.193	179.586		-0.905045
chr8	12505373	12505597	NM_200660	8	-		75.0667	35.3244	37.6533	29.2933		24.394	28.893	20.004	17.238		0.302633
chr8	14898222	14898614	NM_001025455	8	+		0.386768	5.28244	13.9695	18.2723		3.992	5.921	16.859	16.338		0.959726
chr8	17703816	17703873	NM_199581	19	-		18.1552	7.55172	6.91379	17.6207		48.122	26.999	57.245	40.909		0.0753475
chr8	17193853	17193970	NM_001077805	24	-		88.3305	24.6356	13.8305	8.51695		102.454	76.496	46.048	39.879		0.918546
chr8	16925585	16925840	NM_212973	19	-		55.1367	43.7461	16.1758	15.3906		54.332	59.444	32.963	34.219		0.923981
chr8	19404450	19404729	NM_201497	9	-		18.4357	7.95	22.9714	8.5		21.954	19.894	106.312	45.282		0.657669
chr8	19137355	19137938	NM_001040094	7	-		366.233	21.8973	45.024	59.976		94.249	12.078	26.295	45.668		0.955233
chr8	22934853	22935445	NM_001110372	7	+		26.489	8.33221	28.3204	13.1197		81.165	28.42	39.757	25.343		0.676167
chr8	25944322	25944521	NM_001002655	10	+		11.355	14.925	0.81	2.185		55.662	56.366	5.536	7.333		0.977888
chr8	26614058	26614487	NM_001126482	6	-		5.86977	5.43953	0.153488	0.362791		240.389	185.912	69.952	123.112		0.931069
chr8	26860932	26861212	NM_001045210	14	+		45.9359	26.3843	18.605	2.2242		74.29	101.363	24.03	8.876		0.722995
chr8	27814602	27814682	NM_200085	5	-		11.358	22.679	36.4938	21.1728		29.272	137.125	167.709	107.674		0.929796
chr8	29240229	29240284	NM_213500	8	-		32	8.25	16.8214	6.42857		133.5	98.285	91.341	110.247		0.692357
chr8	28408314	28408375	NM_001002445	5	+		6.09677	4.37097	39.6935	12.0806		94.692	71.286	57.497	60.848		-0.625695
chr8	30699521	30699678	NM_001077546	11	-		20.2025	20.7342	12.1013	3.93671		9.092	40.024	23.527	24.442		0.0386922
chr8	31589949	31590142	NM_001077162	6	-		152.232	347.928	18.7835	37.9021		279.419	355.956	48.816	26.629		0.927927
chr8	32565345	32565451	NM_001007291	17	+		31.9813	8.58879	25.7944	22.9159		50.34	49.024	41.644	50.943		-0.0921237
chr8	37375331	37375493	NM_200957	11	-		21.865	2.60123	1.21472	0.398773		29.716	30.314	12.959	14.279		0.619532
chr8	41812022	41812305	NM_212787	5	-		189.94	98.0915	29.9014	39.1761		41.691	44.524	27.805	22.255		0.768766
chr8	46927677	46927815	NM_001003551	4	-		6.39568	0.223022	4.09353	3.68345		120.416	10.657	16.104	12.092		0.753662
chr8	47446325	47446588	NM_213457	5	+		30.6136	107.015	24.9242	16.6818		86.709	81.47	65.046	38.979		0.536861
chr8	47992039	47992344	NM_200779	23	-		0.428105	0.316993	1.58824	4.93464		39.03	47.129	60.013	97.898		0.988032
chr8	54507875	54508714	NM_131296	13	-		7.25119	29.1905	23.4988	24.2286		15.08	6.868	25.288	23.413		-0.0632047
chr8	53618732	53618857	NM_001034176	20	-		46.8492	31.2857	20.6746	36.2698		70.077	92.364	90.711	155.916		-0.0914752
chr8	88098	88232	NM_001089546	3	+		154.215	8.26667	15.2074	12.4519		48.566	52.103	15.852	23.928		0.465412
chr8	442763	442949	NM_212912	3	+		265.187	20.9465	90.7754	112.032		59.654	39.787	41.77	53.13		0.906643
chr8	499662	500120	NM_001077726	6	+		20.8519	22.2222	32.2527	31.6797		8.427	15.157	10.065	12.864		0.00727549
chr8	448286	448539	NM_198145	4	+		33.1102	35.9724	19.4764	41.8543		9.536	19.183	5.284	7.075		0.372266
chr8	458387	458534	NM_001030255	9	+		1.48649	1.14865	32.277	37.1014		5.544	6.631	24.03	27.658		0.998585
chr8	421171	421298	NM_200136	25	-		13.5	4.17969	4.60156	21.5625		15.302	13.973	23.779	27.401		0.515558
chr8	589314	589414	NM_213343	5	+		24.2376	63.9802	75.7426	41.2574		64.976	184.491	427.262	120.539		0.889501
chr8	589117	589222	NM_001006084	4	-		8.96226	69.1226	14.6132	20.7925		64.976	184.491	427.262	120.539		-0.0405508
chr8	690342	690489	NM_001017864	5	+		9.91892	27.3784	7.92568	4.08108		19.515	41.208	36.36	42.324		0.197
chr8	976288	976374	NM_001003778	11	+		14.6552	21.1839	17.1954	39.9195		107.998	49.261	49.822	62.649		-0.298507
chr8	1288048	1288484	NM_001017726	6	-		94.6682	13.2265	15.7117	46.8238		69.19	81.706	51.835	119.124		0.0953557
chr8	2609251	2609305	NM_213246	9	-		25.3636	4.54545	18.7455	23.3273		41.913	39.077	67.688	159.775		0.430523
chr8	2705180	2705299	NM_001004612	4	+		12.925	10.05	29.4333	27.4833		105.337	86.443	36.863	73.713		-0.812921
chr8	2631960	2632117	NM_001003879	14	+		19.9241	33.8354	25.4937	24.3101		187.61	136.651	126.191	63.035		-0.205729
chr8	2662358	2662406	NM_213024	3	+		51.449	518.633	426.673	454.388		106.002	831.274	690.842	544.161		0.957906
chr8	2704853	2704946	NM_213052	10	-		23.8085	6.80851	11.0426	15.4894		105.337	86.443	36.863	73.713		0.516319
chr8	2718693	2718792	NM_001003885	14	+		114.04	43.73	10.38	16.39		84.713	109.652	14.972	9.906		0.653084
chr8	2766449	2766722	NM_201475	8	-		410.887	230.741	629.007	290.792		199.363	520.79	549.427	268.993		0.27187
chr8	2790972	2791196	NM_213257	10	-		56.9556	9.68889	6.87111	6.30222		117.977	32.919	1.51	6.175		0.979582
chr8	2817451	2817833	NM_001126405	3	+		12.7441	4.25065	3.84073	1.80418		13.749	9.947	7.8	2.573		0.874758
chr8	2935488	2935636	NM_001039998	11	+		11.047	26.4832	2.26174	1.89933		37.921	40.261	5.536	7.075		0.862393
chr8	2935506	2935636	NM_205593	9	+		12.2748	29.9008	2.57252	1.8855		37.921	40.261	5.536	7.075		0.859618
chr8	3610454	3610679	NM_200130	3	-		60.2832	21.8496	5.14159	4.63274		178.961	107.047	43.909	31.518		0.978998
chr8	3844292	3844513	NM_001003548	6	+		104.554	71.2703	30.4009	42.6532		241.72	173.597	42.147	31.904		0.969704
chr8	4819279	4819378	NM_199988	12	-		0.89	2.01	2.09	0.66		25.946	4.737	13.336	22.899		-0.881577
chr8	4969086	4969232	NM_213386	18	-		98.7075	0.993197	8.2381	4.87075		595.207	92.127	87.566	91.208		0.997536
chr8	4997278	4997526	NM_200147	7	-		43.8795	104.028	27.5422	73.5823		13.306	88.101	82.03	84.004		0.424746
chr8	5012446	5012734	NM_001020524	4	+		29.8547	52.3979	13.827	5.60208		20.18	15.157	6.668	6.818		0.697158
chr8	5437283	5437346	NM_001012242	6	-		37.1875	5.90625	15.75	44		2.661	11.368	32.334	81.689		0.515352
chr8	7512782	7512820	NM_001023573	10	-		7.84615	0.384615	0.384615	3.35897		26.611	8.052	20.508	25.986		0.704279
chr8	7853253	7854064	NM_178133	1	+		122.26	113.422	325.489	305.911		232.628	181.175	102.538	127.357		-0.913652
chr8	7852356	7854061	NM_001164240	1	+		75.01	128.024	184.224	186.121		232.628	181.175	102.538	127.357		-0.980977
chr8	8590918	8591857	NM_001111186	8	+		5.03511	1.30957	0.776596	0.962766		3.548	4.5	9.184	10.677		-0.720667
chr8	8894400	8894486	NM_173284	6	-		19.4368	44.4828	18.7011	19.9195		33.042	23.683	14.846	12.35		0.191931
chr8	9034406	9034552	NM_001020547	4	-		2.02041	58.4898	18.102	8.85034		109.772	68.681	89.579	14.923		-0.0627861
chr8	9243917	9244218	NM_001004671	6	+		8.38742	11.4305	13.4007	3.94702		49.231	39.551	26.169	20.197		0.245438
chr8	9243119	9243446	NM_001009987	8	-		10.5152	4.04268	5.1372	3.07622		49.231	39.551	26.169	20.197		0.80237
chr8	9472729	9472946	NM_131539	7	+		2.93119	6.40367	5.90367	3.56422		5.988	30.788	9.813	17.624		0.598327
chr8	9492455	9492664	NM_001130073	4	+		26.9952	19.3619	13.2095	7.91429		39.917	30.551	13.839	23.799		0.798877
chr8	10244136	10244178	NM_001123320	28	+		50.9302	7.5814	10.3721	1.25581		94.692	32.446	23.275	11.321		0.987322
chr8	10914356	10914660	NM_001077391	6	-		1.74098	10.282	62.3475	109.577		3.77	89.522	119.397	184.732		0.914869
chr8	11381356	11381507	NM_001083016	6	-		13.3882	3.84868	7.97368	1		191.158	94.969	20.13	10.291		0.755729
chr8	11575150	11575408	NM_131145	5	+		147.884	56.5714	26.2432	16.9228		184.062	282.065	114.616	71.268		0.426168
chr8	11690077	11690206	NM_001007774	7	+		528.462	363.369	85.0846	215.362		123.078	96.627	129.462	87.22		-0.010382
chr8	11702089	11702682	NM_001002871	20	+		99.0404	52.5606	28.0539	59.4125		53.223	87.864	46.551	70.497		-0.026971
chr8	12204785	12204961	NM_200965	22	+		111.446	11.6215	2.15819	6.29379		36.812	16.815	17.991	13.893		0.981047
chr8	12287421	12287522	NM_001113585	11	-		17.8137	22.8431	14.1667	16.4314		46.348	47.366	26.295	26.629		0.812304
chr8	12635628	12636278	NM_001024214	3	+		23.9816	14.3886	17.3702	21.2581		32.155	40.261	46.928	17.495		-0.601158
chr8	13441219	13441421	NM_001004664	20	+		43.7291	21.4138	17.4877	19.7291		40.139	53.05	54.226	27.658		-0.20757
chr8	13581733	13581844	NM_199565	11	+		93.8661	226.518	56.5089	39.1964		126.626	120.073	84.924	58.275		0.691109
chr8	13881789	13881830	NM_200565	5	-		27.619	33.6429	10.9524	6.88095		44.131	23.92	37.115	18.139		0.253602
chr8	14597278	14597429	NM_001002639	5	-		43.9079	78.0066	30.3684	23.0789		121.303	92.601	39.883	45.926		0.591928
chr8	14755550	14755974	NM_001044945	19	-		28.4024	42.6306	49.1365	43.7906		40.139	57.076	42.525	37.564		0.172332
chr8	14701100	14701374	NM_001044981	3	-		20.6327	4.08364	81.9418	156.56		37.034	10.421	55.106	98.412		0.977992
chr8	15071319	15071736	NM_001128364	12	-		44.0191	17.1627	4.94737	6.74641		104.228	72.707	44.664	44.768		0.982469
chr8	15503956	15504171	NM_001003634	14	+		379.102	87.4954	4.77778	7.09259		199.585	357.85	96.373	44.639		0.329672
chr8	15756499	15756567	NM_001113603	8	+		0.434783	1.02899	0.73913	0.275362		3.326	3.079	5.913	5.918		-0.434985
chr8	15768398	15768611	NM_001111179	3	+		6.41589	3.36449	13.0421	18.0888		180.957	31.735	64.291	54.03		-0.227482
chr8	15786373	15786583	NM_199845	7	+		161.161	61.8673	32	42.6682		8.427	22.973	8.807	11.578		-0.246634
chr8	15794824	15794953	NM_001145786	7	+		56.1154	39.9615	8.13846	1.48462		172.53	249.856	108.954	42.581		0.790286
chr8	16983302	16983853	NM_001128408	3	-		32.8623	13.3406	3.20833	3.60688		37.478	21.078	13.085	8.619		0.986676
chr8	17111691	17111891	NM_199713	9	-		26.3781	29.0647	26.7313	15.7164		155.676	107.047	135.879	66.766		0.739662
chr8	17277713	17277908	NM_199875	8	+		20.5765	4.26531	9.33673	8.91837		109.328	24.157	41.393	25.214		0.964546
chr8	17244706	17244973	NM_198872	12	-		100.687	22.4179	10.3657	8.41791		217.991	81.943	58.629	57.632		0.999897
chr8	17245785	17245894	NM_001159946	2	+		54.5727	12.4182	20.9273	43.2182		217.991	81.943	58.629	57.632		0.665484
chr8	17257720	17258005	NM_001005984	12	+		8.19231	1.94056	15.8916	12.3951		67.859	19.42	35.857	19.168		0.0829886
chr8	17257395	17257604	NM_001113650	4	-		13.9619	42.0762	13.1429	30.9048		67.859	19.42	35.857	19.168		-0.761131
chr8	17196293	17196392	NM_001113652	13	+		7.04	5.91	0.45	0.82		62.537	17.762	14.72	18.267		0.702329
chr8	18530377	18530533	NM_213450	16	+		40.1911	27.0955	57.1146	18.7197		127.956	248.672	172.239	210.718		-0.582943
chr8	18722535	18722729	NM_001024438	8	-		1.52308	2.42564	4.07179	5.66154		13.527	9.947	24.156	9.52		0.0401988
chr8	18722535	18722729	NM_001204524	8	-		1.52308	2.42564	4.07179	5.66154		13.527	9.947	24.156	9.52		0.0401988
chr8	18887038	18887136	NM_200255	11	-		17.0505	19.5152	6.9596	6.37374		65.641	47.84	45.796	29.717		0.679422
chr8	19101949	19102322	NM_214763	6	-		7.07754	6.14973	38.1497	73.8396		18.628	11.605	25.792	67.152		0.956475
chr8	19064938	19065086	NM_001045105	7	+		21.8523	1.73826	14.255	12.1611		84.713	88.575	48.564	69.725		-0.22111
chr8	19355876	19355986	NM_001076565	13	+		1.99099	1.52252	5.87387	8.3964		7.762	4.263	6.416	12.736		0.7908
chr8	19791235	19791270	NM_212872	5	-		76.2778	512.083	29.75	49.8056		89.148	87.627	33.844	39.751		0.620874
chr8	20028108	20028135	NM_207051	12	+		7.67857	12.5	2.32143	3.85714		6.875	6.631	20.256	10.677		-0.794462
chr8	20675984	20676072	NM_001013278	18	-		33.5393	40.9663	36.3371	22.8202		55.44	89.759	97.38	54.159		0.756967
chr8	20954129	20954360	NM_199716	4	+		137.246	192.599	19.0905	28.5172		123.965	121.494	48.438	31.518		0.940428
chr8	20993151	20993483	NM_001126416	16	+		4.91592	9.97898	9.57357	0.486486		34.817	57.313	40.009	8.748		0.932713
chr8	20976906	20977014	NM_194402	14	+		7.62385	2.55046	11.4587	12.0734		17.741	34.34	27.302	41.552		0.136844
chr8	21452643	21452761	NM_001007438	19	-		126.496	173.622	22.2773	23.8824		138.823	77.68	31.831	26.629		0.725725
chr8	21396584	21396694	NM_199563	5	-		1.02703	1.20721	20.7658	11.6667		147.693	99.469	132.985	109.733		0.109077
chr8	21401088	21401265	NM_200253	14	+		10.4607	38.4607	35.8202	43.8764		81.608	57.076	45.419	62.263		-0.765004
chr8	21652355	21652498	NM_001171067	7	+		211.368	93.6806	25.0972	36.6806		108.22	100.416	28.56	29.331		0.863401
chr8	21641203	21641256	NM_201471	12	-		18.5556	2.57407	1.51852	4.22222		54.11	91.416	37.744	123.112		-0.263975
chr8	21671419	21671577	NM_001017700	5	+		322.208	138.654	208.252	119.358		78.282	107.284	94.36	72.426		-0.244043
chr8	21648072	21648232	NM_001002575	7	-		264.689	27.1988	34.3602	33.0124		145.697	41.208	84.295	40.137		0.91695
chr8	21697180	21697337	NM_001002477	2	+		13.3354	10.3671	8.17722	7.91772		31.934	28.656	21.388	30.36		0.58451
chr8	22881244	22881404	NM_001130775	4	-		16.1366	10.9255	6.78261	6.37888		7.762	2.842	16.482	16.08		-0.699174
chr8	22884799	22884943	NM_194404	7	+		8.97241	8.42069	7.64828	1.86207		50.34	35.288	20.382	10.034		0.823342
chr8	23958141	23958499	NM_212713	6	+		12.0056	30.0919	35	20.4457		36.147	65.128	44.286	46.183		0.563951
chr8	24000200	24000219	NM_200712	5	+		17.3	7.4	3.55	7.95		77.838	15.631	18.872	23.67		0.944602
chr8	24047165	24047353	NM_212733	7	+		6.36508	4.42328	7.79365	8.4709		20.402	22.025	14.469	16.338		-0.895754
chr8	24066271	24066411	NM_200079	5	+		10.1135	23.7021	43.6596	195.816		5.101	3.079	10.317	34.219		0.990832
chr8	24018691	24018816	NM_001002464	5	+		26.6587	10.0476	2.48413	5.04762		26.39	28.42	6.542	12.736		0.724589
chr8	24209206	24209241	NM_001020476	25	+		18.5833	1.63889	45.6389	7.19444		23.507	67.497	190.859	116.808		0.668904
chr8	24234945	24235030	NM_199864	8	+		170.372	10.6512	15.1512	12.6395		98.906	89.285	33.466	39.236		0.651793
chr8	24468091	24468473	NM_001025485	16	+		31.8042	71.9269	15.1018	23.6084		57.214	75.312	20.256	26.243		0.909931
chr8	24492078	24492542	NM_001077143	14	+		105.48	52.2968	53.8645	63.7527		63.646	116.994	64.542	60.462		-0.43388
chr8	24465216	24465371	NM_001002648	16	-		17.0833	4.58974	30.4551	16.3013		29.051	40.735	187.965	175.727		0.687495
chr8	24591082	24591112	NM_199636	6	+		96.9355	88.5161	1040.48	1224.16		37.034	41.682	223.57	484.471		0.918608
chr8	24680513	24680873	NM_131722	12	+		199.125	83.5928	67.1745	84.0111		77.395	88.575	27.553	30.874		0.508274
chr8	24714403	24714456	NM_199650	16	+		180.463	111.722	12.2963	11.8333		74.512	77.207	50.577	31.003		0.85696
chr8	24966273	24966435	NM_001077283	5	-		15.5828	5.80368	12.3865	25.9877		3.77	2.368	31.831	26.243		0.494397
chr8	25887493	25887523	NM_001045253	4	+		1.16129	3.70968	1.96774	0.419355		54.553	45.471	18.495	7.333		0.458304
[truncated: 3,449 more rows]

## Sheet: Table 4
Supplementary Table 4. Verification of annotated RefSeq and Ensembl genes by CAGE and RNA-seq transcript coordinates
# Number of Ensembl and Refseq genes captured by CAGE TCs, at distinct thresholds
# Number in parenthesis indicates the percentage of annotated genes supported by CAGE TCs
	CAGE tags around 5'TSS	1 tpm	0.5 tpm	0.25 tpm	0.1 tpm
Ensembl genes	± 500 bp	14266 (52.24%)	17438 (63.86%)	18955 (69.41%)	20725 (75.89%)
Refseq genes	± 500 bp	10668 (69.87%)	12216 (80.01%)	12804 (83.86%)	13421 (87.90%)
# Number of RNA-seq transcripts and their expression values as measured by rpkm
Stages	rpkm >= 1	rpkm >= 0.5	rpkm > 0
2cells	37973	400072	46664
30%Epiboly	40245	42532	47946
14somites	44411	46269	49174
Prim6	43590	45950	49589
Zebrafish embryonic transcriptome constructed from RNA-seq. The gene models are annotated on BED format and an additional column indicating the presence or absence of CAGE tags around promoter regions.
Last column indicates how many of these have CAGE tags in their promoter region
Chr	Start	End	ID	Score	Strand	NA	NA	NA	blockCount	blockSizes	blockStarts	CAGE-based Evidence
chr10	1011087	1015142	TCONS_00006241	1000	+	0	0	0	4	12,165,179,1260,	0,446,1203,2795,	NO
chr10	10144144	10244373	TCONS_00006536	1000	+	0	0	0	13	19,703,40,129,428,75,125,491,116,172,112,207,4491,	0,8884,16832,69605,76302,78858,80756,83604,86940,90886,91595,92628,95738,	YES
chr10	10144144	10244373	TCONS_00006537	1000	+	0	0	0	12	19,703,40,129,428,125,491,116,172,112,207,4491,	0,8884,16832,69605,76302,80756,83604,86940,90886,91595,92628,95738,	YES
chr10	10176235	10244373	TCONS_00006538	1000	+	0	0	0	10	380,129,428,125,491,116,172,112,207,4491,	0,37514,44211,48665,51513,54849,58795,59504,60537,63647,	YES
chr10	10176350	10240058	TCONS_00006539	1000	+	0	0	0	10	265,129,428,125,491,116,172,112,207,176,	0,37399,44096,48550,51398,54734,58680,59389,60422,63532,	YES
chr10	102537	107648	TCONS_00006171	1000	+	0	0	0	9	152,369,120,129,306,169,89,111,557,	0,831,1360,1555,1783,2719,3174,3835,4554,	YES
chr10	102537	107655	TCONS_00006172	1000	+	0	0	0	10	152,366,120,129,104,103,169,89,111,564,	0,834,1360,1555,1783,1986,2719,3174,3835,4554,	YES
chr10	10278919	10291921	TCONS_00006540	1000	+	0	0	0	5	76,71,82,49,684,	0,4322,10912,11925,12318,	YES
chr10	10278939	10291840	TCONS_00006541	1000	+	0	0	0	5	56,71,82,46,603,	0,4302,10892,11908,12298,	YES
chr10	10285203	10298323	TCONS_00007939	1000	-	0	0	0	3	344,111,169,	0,5131,12951,	YES
chr10	10317540	10347138	TCONS_00006542	1000	+	0	0	0	12	331,111,118,135,205,120,77,107,133,128,204,1346,	0,3344,3571,6449,8643,9012,12539,12690,12910,15145,20156,28252,	YES
chr10	10317580	10346027	TCONS_00006543	1000	+	0	0	0	12	291,111,118,135,205,120,77,107,133,128,204,235,	0,3304,3531,6409,8603,8972,12499,12650,12870,15105,20116,28212,	YES
chr10	10326394	10347138	TCONS_00006544	1000	+	0	0	0	7	50,120,77,133,128,204,1346,	0,158,3685,4056,6291,11302,19398,	YES
chr10	10353216	10413099	TCONS_00006545	1000	+	0	0	0	10	127,327,179,180,124,101,105,130,87,64,	0,1587,3569,6395,10789,12025,29864,45380,59654,59819,	YES
chr10	10353216	10527336	TCONS_00006546	1000	+	0	0	0	21	127,327,179,180,124,101,105,130,87,91,142,84,114,139,114,148,94,163,169,136,424,	0,1587,3569,6395,10789,12025,29864,45380,59654,90226,94667,103640,104135,105535,107235,107515,130549,148431,156584,158118,173696,	YES
chr10	10353223	10527714	TCONS_00006547	1000	+	0	0	0	22	120,327,179,180,124,101,105,130,87,91,142,84,114,139,114,148,94,163,169,136,184,92,	0,1580,3562,6388,10782,12018,29857,45373,59647,90219,94660,103633,104128,105528,107228,107508,130542,148424,156577,158111,173689,174399,	YES
chr10	10353284	10527711	TCONS_00006548	1000	+	0	0	0	17	59,327,179,180,124,101,105,130,87,77,96,139,114,148,94,184,89,	0,1519,3501,6327,10721,11957,29796,45312,59586,90158,104085,105467,107167,107447,130481,173628,174338,	YES
chr10	10354808	10527711	TCONS_00006549	1000	+	0	0	0	21	322,179,180,124,101,105,130,87,91,142,84,114,139,114,148,94,163,169,136,184,89,	0,1977,4803,9197,10433,28272,43788,58062,88634,93075,102048,102543,103943,105643,105923,128957,146839,154992,156526,172104,172814,	YES
chr10	10694765	10703146	TCONS_00006553	1000	+	0	0	0	5	349,55,110,95,705,	0,2172,2452,7213,7676,	YES
chr10	10694890	10703146	TCONS_00006554	1000	+	0	0	0	4	224,55,110,1168,	0,2047,2327,7088,	YES
chr10	10754706	10762072	TCONS_00006557	1000	+	0	0	0	6	102,140,77,111,102,404,	0,3309,4456,4619,6576,6962,	YES
chr10	10754706	10762832	TCONS_00006558	1000	+	0	0	0	7	102,140,77,111,102,41,161,	0,3309,4456,4619,6576,6962,7965,	YES
chr10	10767459	10789768	TCONS_00006559	1000	+	0	0	0	10	260,143,77,117,102,47,76,168,177,551,	0,1560,13913,14072,15276,15816,18580,21237,21494,21758,	YES
chr10	10767603	10783526	TCONS_00006561	1000	+	0	0	0	6	116,143,77,117,102,251,	0,1416,13769,13928,15132,15672,	YES
chr10	10782809	10789344	TCONS_00006562	1000	+	0	0	0	5	28,47,76,168,391,	0,466,3230,5887,6144,	YES
chr10	107849	109655	TCONS_00007600	1000	-	0	0	0	3	491,160,136,	0,1424,1670,	NO
chr10	10788650	10789344	TCONS_00006563	1000	+	0	0	0	3	214,177,127,	0,303,567,	YES
chr10	10826654	10830227	TCONS_00007947	1000	-	0	0	0	2	3398,97,	0,3476,	YES
chr10	10826654	10831420	TCONS_00007948	1000	-	0	0	0	3	3398,101,98,	0,3476,4668,	YES
chr10	10845947	10935392	TCONS_00007949	1000	-	0	0	0	20	927,67,132,54,153,161,178,110,199,151,167,39,74,107,140,54,348,65,72,157,	0,3283,50028,50318,54563,55323,55563,55853,57716,58569,60671,60928,65540,65908,66416,66636,70793,72942,80686,89288,	YES
chr10	10845947	10935455	TCONS_00007950	1000	-	0	0	0	20	927,67,132,54,201,161,178,110,199,151,167,39,74,107,140,54,348,65,72,220,	0,3283,50028,50318,54563,55323,55563,55853,57716,58569,60671,60928,65540,65908,66416,66636,70793,72942,80686,89288,	YES
chr10	10846282	10926714	TCONS_00007951	1000	-	0	0	0	19	592,67,132,54,153,161,178,110,199,151,167,39,74,107,140,54,348,65,81,	0,2948,49693,49983,54228,54988,55228,55518,57381,58234,60336,60593,65205,65573,66081,66301,70458,72607,80351,	YES
chr10	10846560	10926658	TCONS_00007952	1000	-	0	0	0	19	314,67,132,54,201,161,178,110,199,151,167,39,74,107,140,54,348,65,25,	0,2670,49415,49705,53950,54710,54950,55240,57103,57956,60058,60315,64927,65295,65803,66023,70180,72329,80073,	YES
chr10	10938643	10965000	TCONS_00006564	1000	+	0	0	0	6	273,128,117,174,72,1926,	0,7325,11724,14380,15211,24431,	YES
chr10	10938653	10965000	TCONS_00006565	1000	+	0	0	0	8	263,261,97,116,123,174,72,1926,	0,7315,7870,8058,11708,14370,15201,24421,	YES
chr10	10938690	10964395	TCONS_00006566	1000	+	0	0	0	8	226,261,97,116,123,174,72,1321,	0,7278,7833,8021,11671,14333,15164,24384,	YES
chr10	10938690	10965000	TCONS_00006567	1000	+	0	0	0	8	226,261,97,116,124,174,72,1926,	0,7278,7833,8021,11671,14333,15164,24384,	YES
chr10	10938690	10965000	TCONS_00006568	1000	+	0	0	0	10	226,261,97,116,109,48,124,174,72,1926,	0,7278,7833,8021,8443,8662,11671,14333,15164,24384,	YES
chr10	10938705	10953198	TCONS_00006569	1000	+	0	0	0	4	211,128,117,175,	0,7263,11662,14318,	YES
chr10	10946128	10953060	TCONS_00006570	1000	+	0	0	0	7	101,97,116,109,48,124,37,	0,395,583,1005,1224,4233,6895,	YES
chr10	1096088	1121264	TCONS_00006243	1000	+	0	0	0	7	181,168,165,60,192,348,89,	0,3512,3790,14598,20804,23347,25087,	YES
chr10	10966789	10977896	TCONS_00007953	1000	-	0	0	0	5	1168,119,173,120,379,	0,2982,7955,9053,10728,	YES
chr10	10966795	10977861	TCONS_00007954	1000	-	0	0	0	5	1162,119,173,120,344,	0,2976,7949,9047,10722,	YES
chr10	11004087	11060023	TCONS_00006571	1000	+	0	0	0	9	251,142,103,102,113,179,87,187,1839,	0,14692,38529,43306,43630,48490,50120,50529,54097,	YES
chr10	110473	114704	TCONS_00007602	1000	-	0	0	0	5	132,166,110,45,2297,	0,446,1217,1802,1934,	YES
chr10	11104960	11227461	TCONS_00007955	1000	-	0	0	0	14	7557,78,217,93,34,140,75,175,111,168,147,170,79,183,	0,9291,10249,13720,14169,16503,22101,27588,35279,39429,42054,44135,64021,122318,	YES
chr10	11105113	11169009	TCONS_00007956	1000	-	0	0	0	13	7404,78,217,93,34,140,75,175,111,168,147,170,28,	0,9138,10096,13567,14016,16350,21948,27435,35126,39276,41901,43982,63868,	YES
chr10	11111531	11112569	TCONS_00006573	1000	+	0	0	0	2	913,11,	0,1027,	NO
chr10	11112216	11227461	TCONS_00007957	1000	-	0	0	0	14	301,78,217,93,34,140,75,175,111,168,147,170,79,183,	0,2035,2993,6464,6913,9247,14845,20332,28023,32173,34798,36879,56765,115062,	YES
chr10	11231130	11246004	TCONS_00006574	1000	+	0	0	0	10	169,164,99,115,104,99,195,72,141,28,	0,2268,9874,10072,11154,11548,13616,14004,14184,14846,	YES
chr10	11231165	11246479	TCONS_00006575	1000	+	0	0	0	11	134,164,99,115,104,99,195,72,141,129,252,	0,2233,9839,10037,11119,11513,13581,13969,14149,14847,15062,	YES
chr10	11248763	11278238	TCONS_00006576	1000	+	0	0	0	13	198,317,475,21,43,9,23,15,37,12,48,78,1034,	0,3756,4088,4946,8124,10463,10866,13194,21151,22688,22739,24475,28441,	YES
chr10	11248778	11276665	TCONS_00006577	1000	+	0	0	0	6	183,317,680,180,207,772,	0,3741,4073,26537,26810,27115,	YES
chr10	11248778	11278238	TCONS_00006578	1000	+	0	0	0	9	183,317,680,48,120,318,96,66,1034,	0,3741,4073,14223,15683,15875,17937,28062,28426,	YES
chr10	11248778	11278238	TCONS_00006579	1000	+	0	0	0	7	183,1012,120,318,96,66,1034,	0,3741,15683,15875,17937,28062,28426,	YES
chr10	11252672	11278238	TCONS_00006580	1000	+	0	0	0	12	164,475,21,43,9,23,15,37,12,48,78,1034,	0,179,1037,4215,6554,6957,9285,17242,18779,18830,20566,24532,	YES
chr10	11252820	11264499	TCONS_00006581	1000	+	0	0	0	3	711,48,38,	0,10181,11641,	YES
chr10	11285866	11289030	TCONS_00007959	1000	-	0	0	0	4	252,91,97,178,	0,332,2641,2986,	YES
chr10	11293250	11318814	TCONS_00007960	1000	-	0	0	0	14	1098,203,138,103,72,92,198,71,199,156,134,118,656,27,	0,4511,4833,5522,7001,7169,7347,7689,11792,15763,16010,16230,20146,25537,	YES
chr10	11293250	11318997	TCONS_00007961	1000	-	0	0	0	14	1098,203,138,103,72,92,198,71,199,156,134,118,656,153,	0,4511,4833,5522,7001,7169,7347,7689,11792,15763,16010,16230,20146,25594,	YES
chr10	11297864	11299009	TCONS_00007962	1000	-	0	0	0	3	100,138,237,	0,219,908,	YES
chr10	11313396	11317429	TCONS_00007963	1000	-	0	0	0	2	656,234,	0,3799,	YES
chr10	11321779	11334372	TCONS_00006583	1000	+	0	0	0	10	142,80,152,104,154,151,171,116,85,634,	0,2392,3261,4042,4250,5623,6324,7700,9220,11959,	YES
chr10	11360423	11363367	TCONS_00007967	1000	-	0	0	0	5	431,76,153,48,65,	0,1366,1597,2524,2879,	YES
chr10	11360423	11363486	TCONS_00007968	1000	-	0	0	0	5	431,76,153,48,114,	0,1366,1597,2524,2949,	YES
chr10	11364002	11448034	TCONS_00006584	1000	+	0	0	0	14	226,97,113,144,99,101,70,80,25,152,101,110,113,44,	0,1229,1454,3046,3395,3569,4925,5093,5355,5815,52547,81705,83689,83988,	YES
chr10	11364006	11467320	TCONS_00006585	1000	+	0	0	0	14	222,97,113,144,99,101,70,80,25,152,101,113,113,444,	0,1225,1450,3042,3391,3565,4921,5089,5351,5811,52543,81698,83685,102870,	YES
chr10	11559707	11730335	TCONS_00007969	1000	-	0	0	0	26	296,157,177,205,130,139,164,81,124,134,103,64,146,108,142,147,106,44,146,84,218,169,365,392,134,139,	0,3663,11022,11289,16181,17973,27794,31623,37076,43501,47324,56256,65193,71704,84050,91198,94602,109991,140565,146451,146667,147703,162467,168028,170116,170489,	YES
chr10	11559707	11730343	TCONS_00007970	1000	-	0	0	0	26	296,157,177,205,130,139,164,81,124,134,103,64,146,108,142,147,109,44,146,84,218,169,365,392,134,147,	0,3663,11022,11289,16181,17973,27794,31623,37076,43501,47324,56256,65193,71704,84050,91198,94602,109991,140565,146451,146667,147703,162467,168028,170116,170489,	YES
chr10	117106	122303	TCONS_00006173	1000	+	0	0	0	7	208,91,62,60,57,48,524,	0,1301,1409,1823,1999,3040,4673,	YES
chr10	117106	123678	TCONS_00006174	1000	+	0	0	0	7	208,91,62,60,57,48,1899,	0,1301,1409,1823,1999,3040,4673,	YES
chr10	11733686	11754461	TCONS_00006587	1000	+	0	0	0	11	137,103,104,121,448,191,190,182,82,183,203,	0,355,1315,1546,5774,6320,11444,11713,12280,19040,20572,	YES
chr10	11733686	11754744	TCONS_00006588	1000	+	0	0	0	11	137,103,104,121,448,191,190,182,82,197,486,	0,355,1315,1546,5774,6320,11444,11713,12280,19040,20572,	YES
chr10	11755167	11806324	TCONS_00007974	1000	-	0	0	0	12	1789,125,111,130,135,216,183,81,127,122,163,186,	0,14311,14549,16250,19802,20016,20322,45661,45813,49628,49845,50971,	YES
chr10	11756200	11806249	TCONS_00007975	1000	-	0	0	0	12	756,125,111,130,135,216,183,81,127,122,163,111,	0,13278,13516,15217,18769,18983,19289,44628,44780,48595,48812,49938,	YES
chr10	11756776	11806249	TCONS_00007976	1000	-	0	0	0	11	180,125,111,130,135,216,183,279,122,163,111,	0,12702,12940,14641,18193,18407,18713,44052,48019,48236,49362,	YES
chr10	1194063	1268979	TCONS_00007636	1000	-	0	0	0	12	4268,116,121,181,205,149,31,167,542,34,152,99,	0,7012,7548,9310,13289,14945,22599,22835,33679,35702,43264,74817,	YES
chr10	12068050	12098529	TCONS_00007977	1000	-	0	0	0	2	4338,739,	0,29740,	YES
chr10	12068050	12135264	TCONS_00007978	1000	-	0	0	0	3	4338,755,272,	0,29740,66942,	YES
chr10	12071719	12135227	TCONS_00007979	1000	-	0	0	0	3	669,755,235,	0,26071,63273,	YES
chr10	1208116	1269041	TCONS_00007637	1000	-	0	0	0	8	49,149,31,167,542,34,152,161,	0,892,8546,8782,19626,21649,29211,60764,	YES
chr10	1214468	1269041	TCONS_00007638	1000	-	0	0	0	7	959,31,167,542,34,152,161,	0,2194,2430,13274,15297,22859,54412,	YES
chr10	1214530	1269041	TCONS_00007639	1000	-	0	0	0	7	897,31,167,17,34,152,161,	0,2132,2368,4580,15235,22797,54350,	YES
chr10	12438614	12656191	TCONS_00006589	1000	+	0	0	0	17	85,65,664,156,336,125,160,103,68,126,186,62,210,150,194,156,2757,	0,9109,39836,93573,100617,140446,143412,148647,164123,165850,176496,177071,177729,197228,205267,213708,214820,	YES
chr10	13048112	13080127	TCONS_00007982	1000	-	0	0	0	11	1236,149,195,187,70,90,89,24,161,264,321,	0,1548,2639,5359,5664,5835,12214,14417,14912,17542,31694,	YES
chr10	13048112	13080127	TCONS_00007983	1000	-	0	0	0	11	1236,149,195,187,68,92,89,24,161,264,321,	0,1548,2639,5359,5664,5833,12214,14417,14912,17542,31694,	YES
chr10	13048112	13142710	TCONS_00007984	1000	-	0	0	0	18	1236,149,195,187,70,90,89,24,161,264,7,160,125,142,128,149,127,140,	0,1548,2639,5359,5664,5835,12214,14417,14912,17542,31694,39059,57575,59765,60015,62162,63316,94458,	YES
chr10	13048112	13142710	TCONS_00007985	1000	-	0	0	0	17	1236,149,195,187,68,92,89,24,161,271,160,125,142,128,149,127,140,	0,1548,2639,5359,5664,5833,12214,14417,14912,17542,39059,57575,59765,60015,62162,63316,94458,	YES
chr10	13048112	13142776	TCONS_00007986	1000	-	0	0	0	18	1236,149,195,187,68,92,89,24,161,264,7,160,125,142,128,149,127,206,	0,1548,2639,5359,5664,5833,12214,14417,14912,17542,31694,39059,57575,59765,60015,62162,63316,94458,	YES
chr10	13173369	13199802	TCONS_00006592	1000	+	0	0	0	12	225,126,78,79,152,86,194,106,48,119,98,291,	0,1486,7820,8159,8469,11658,13095,16712,16898,24844,25046,26142,	YES
chr10	13173369	13199802	TCONS_00006593	1000	+	0	0	0	11	225,78,79,152,86,194,102,52,119,98,291,	0,7820,8159,8469,11658,13095,16712,16894,24844,25046,26142,	YES
chr10	13242842	13255199	TCONS_00006595	1000	+	0	0	0	3	76,411,5177,	0,4476,7180,	YES
chr10	13247357	13255059	TCONS_00006598	1000	+	0	0	0	2	372,5037,	0,2665,	YES
chr10	13262639	13307621	TCONS_00007991	1000	-	0	0	0	11	230,80,103,78,157,167,185,115,161,67,146,	0,16798,16985,18960,23199,27813,31490,33189,35332,35931,44836,	YES
chr10	13268374	13360574	TCONS_00007993	1000	-	0	0	0	11	2575,80,103,78,157,167,185,115,67,97,142,	0,11063,11250,13225,17464,22078,25755,27454,30196,39101,92058,	YES
chr10	13269399	13307621	TCONS_00007995	1000	-	0	0	0	11	1550,80,103,78,157,167,185,115,161,67,146,	0,10038,10225,12200,16439,21053,24730,26429,28572,29171,38076,	YES
chr10	13279438	13307572	TCONS_00007996	1000	-	0	0	0	10	79,103,78,157,167,185,115,161,67,97,	0,186,2161,6400,11014,14691,16390,18533,19132,28037,	YES
chr10	13423919	13736637	TCONS_00007997	1000	-	0	0	0	9	1146,118,190,164,167,118,234,82,223,	0,10258,15729,69041,76602,80967,140426,212648,312495,	YES
chr10	13423921	13636649	TCONS_00007998	1000	-	0	0	0	8	1144,118,190,164,167,118,234,82,	0,10256,15727,69039,76600,80965,140424,212646,	YES
chr10	14227473	14452308	TCONS_00008002	1000	-	0	0	0	11	247,58,155,84,133,123,57,130,76,170,396,	0,426,11262,63143,74141,157742,200758,206723,215202,220697,224439,	YES
chr10	14227473	14452308	TCONS_00008003	1000	-	0	0	0	12	484,155,81,84,133,123,57,130,49,76,170,396,	0,11262,24577,63143,74141,157742,200758,206723,213102,215202,220697,224439,	YES
chr10	14227473	14452308	TCONS_00008004	1000	-	0	0	0	11	484,155,84,133,123,57,130,49,76,170,396,	0,11262,63143,74141,157742,200758,206723,213102,215202,220697,224439,	YES
chr10	14227478	14451949	TCONS_00008005	1000	-	0	0	0	12	242,58,155,84,133,123,57,130,49,76,170,37,	0,421,11257,63138,74136,157737,200753,206718,213097,215197,220692,224434,	YES
chr10	14290615	14451944	TCONS_00008006	1000	-	0	0	0	8	85,133,123,57,130,76,170,32,	0,10999,94600,137616,143581,152060,157555,161297,	YES
chr10	143057	261703	TCONS_00006175	1000	+	0	0	0	10	142,54,118,120,201,51,204,252,119,774,	0,110399,111403,112004,112888,113966,115738,116266,117262,117872,	YES
chr10	14384753	14452262	TCONS_00008007	1000	-	0	0	0	7	585,57,130,49,76,170,350,	0,43478,49443,55822,57922,63417,67159,	YES
chr10	14391932	14452308	TCONS_00008008	1000	-	0	0	0	7	138,57,130,49,76,170,396,	0,36299,42264,48643,50743,56238,59980,	YES
chr10	14422309	14452308	TCONS_00008009	1000	-	0	0	0	8	304,130,57,130,49,76,170,396,	0,402,5922,11887,18266,20366,25861,29603,	YES
chr10	14452414	14458029	TCONS_00006602	1000	+	0	0	0	4	243,201,93,617,	0,2330,3280,4998,	YES
chr10	14571357	14574196	TCONS_00008012	1000	-	0	0	0	3	597,102,120,	0,1088,2719,	YES
chr10	14571357	14574221	TCONS_00008013	1000	-	0	0	0	4	280,196,102,145,	0,401,1088,2719,	YES
chr10	14576487	14586634	TCONS_00008014	1000	-	0	0	0	10	450,63,68,99,66,78,64,910,777,188,	0,831,2266,3763,4673,6060,6656,7277,8319,9959,	YES
chr10	14577321	14585552	TCONS_00008016	1000	-	0	0	0	7	60,68,99,66,78,64,1788,	0,1432,2929,3839,5226,5822,6443,	YES
chr10	1485089	1499970	TCONS_00006247	1000	+	0	0	0	5	101,85,139,101,178,	0,1771,3974,13640,14703,	NO
chr10	1486943	1499970	TCONS_00006248	1000	+	0	0	0	4	2,139,101,178,	0,2120,11786,12849,	NO
chr10	14899575	14949560	TCONS_00008019	1000	-	0	0	0	11	56,113,145,138,213,54,75,135,194,90,239,	0,2199,7784,8018,14196,14936,19205,21106,23608,25803,49746,	YES
chr10	14899575	14957966	TCONS_00008020	1000	-	0	0	0	13	56,113,145,138,213,54,75,135,194,90,428,75,69,	0,2199,7784,8018,14196,14936,19205,21106,23608,25803,49746,58169,58322,	YES
chr10	14899575	14958253	TCONS_00008021	1000	-	0	0	0	13	56,116,145,138,213,54,75,135,194,90,428,79,186,	0,2199,7784,8018,14196,14936,19205,21106,23608,25803,49746,58169,58492,	YES
chr10	14899575	14958253	TCONS_00008022	1000	-	0	0	0	13	56,113,145,138,213,54,75,135,194,90,428,79,186,	0,2199,7784,8018,14196,14936,19205,21106,23608,25803,49746,58169,58492,	YES
chr10	14899575	14971855	TCONS_00008023	1000	-	0	0	0	13	56,113,145,138,213,54,75,135,194,90,428,79,64,	0,2199,7784,8018,14196,14936,19205,21106,23608,25803,49746,58169,72216,	YES
chr10	14901138	14958253	TCONS_00008024	1000	-	0	0	0	12	749,145,138,213,54,75,135,194,90,428,79,186,	0,6221,6455,12633,13373,17642,19543,22045,24240,48183,56606,56929,	YES
chr10	14901505	14958204	TCONS_00008025	1000	-	0	0	0	11	385,145,138,213,54,75,135,194,90,428,137,	0,5854,6088,12266,13006,17275,19176,21678,23873,47816,56562,	YES
chr10	14901507	14958204	TCONS_00008026	1000	-	0	0	0	11	380,145,138,213,54,75,135,194,90,428,137,	0,5852,6086,12264,13004,17273,19174,21676,23871,47814,56560,	YES
chr10	14901678	14958253	TCONS_00008027	1000	-	0	0	0	12	212,145,138,213,54,75,135,194,90,428,79,186,	0,5681,5915,12093,12833,17102,19003,21505,23700,47643,56066,56389,	YES
chr10	14923226	14971855	TCONS_00008028	1000	-	0	0	0	5	151,90,428,79,64,	0,2152,26095,34518,48565,	YES
chr10	14949338	14957966	TCONS_00008029	1000	-	0	0	0	3	411,75,69,	0,8406,8559,	YES
chr10	14997909	14998401	TCONS_00006607	1000	+	0	0	0	2	177,231,	0,261,	NO
chr10	15008937	15009413	TCONS_00006608	1000	+	0	0	0	3	31,264,21,	0,114,455,	NO
chr10	15011195	15045613	TCONS_00006609	1000	+	0	0	0	28	94,216,153,267,216,153,267,216,177,204,168,216,230,130,194,187,216,184,202,165,207,550,126,108,234,313,118,93,	0,194,3951,4201,6359,6654,7149,7499,9994,10258,13139,13394,15894,17868,18076,18448,19902,21518,23540,23843,24853,26857,27978,29493,30392,32179,33693,34325,	NO
chr10	15011550	15045613	TCONS_00006610	1000	+	0	0	0	27	55,153,267,216,153,267,216,177,204,168,216,230,130,194,187,216,184,202,165,207,550,126,108,234,313,118,93,	0,3596,3846,6004,6299,6794,7144,9639,9903,12784,13039,15539,17513,17721,18093,19547,21163,23185,23488,24498,26502,27623,29138,30037,31824,33338,33970,	NO
chr10	15053345	15059994	TCONS_00006611	1000	+	0	0	0	4	76,287,79,517,	0,2596,5955,6132,	YES
chr10	15053579	15059994	TCONS_00006612	1000	+	0	0	0	4	196,287,79,517,	0,2362,5721,5898,	YES
chr10	15053595	15059803	TCONS_00006613	1000	+	0	0	0	4	319,287,79,326,	0,2346,5705,5882,	YES
chr10	15075410	15077355	TCONS_00008034	1000	-	0	0	0	1	1945,	0,	YES
chr10	1511571	1525741	TCONS_00007641	1000	-	0	0	0	5	81,154,134,60,72,	0,5513,10387,11926,14098,	YES
chr10	1511571	1525878	TCONS_00007642	1000	-	0	0	0	5	81,154,134,62,201,	0,5513,10387,11926,14106,	YES
chr10	15283633	15333718	TCONS_00006621	1000	+	0	0	0	19	316,120,123,123,372,123,123,120,126,172,219,119,140,142,150,63,81,170,909,	0,14387,22411,27707,30536,32330,32788,36060,36306,40047,40745,41072,42886,43354,43666,44008,45433,48899,49176,	YES
chr10	15283633	15333718	TCONS_00006622	1000	+	0	0	0	21	316,120,123,123,100,85,123,123,120,126,172,219,119,140,142,150,63,42,81,170,895,	0,14387,22411,27707,30536,30823,32330,32788,36060,36306,40047,40745,41072,42886,43354,43666,44008,45019,45433,48899,49190,	YES
chr10	15283633	15333718	TCONS_00006623	1000	+	0	0	0	19	316,120,123,123,100,85,123,123,120,126,172,219,119,140,142,150,81,170,895,	0,14387,22411,27707,30536,30823,32330,32788,36060,36306,40047,40745,41072,42886,43354,43666,45433,48899,49190,	YES
chr10	15283755	15316474	TCONS_00006624	1000	+	0	0	0	8	194,120,123,123,100,85,123,53,	0,14265,22289,27585,30414,30701,32208,32666,	YES
chr10	15283755	15333718	TCONS_00006625	1000	+	0	0	0	20	194,120,123,123,100,85,123,123,120,126,172,219,119,140,142,150,72,81,170,895,	0,14265,22289,27585,30414,30701,32208,32666,35938,36184,39925,40623,40950,42764,43232,43544,43886,45311,48777,49068,	YES
chr10	15283771	15333716	TCONS_00006626	1000	+	0	0	0	19	178,120,123,123,372,123,123,120,126,172,219,119,140,142,150,72,81,170,893,	0,14249,22273,27569,30398,32192,32650,35922,36168,39909,40607,40934,42748,43216,43528,43870,45295,48761,49052,	YES
chr10	15283771	15333718	TCONS_00006627	1000	+	0	0	0	18	178,120,123,123,372,123,123,120,126,172,219,119,140,142,150,81,170,895,	0,14249,22273,27569,30398,32192,32650,35922,36168,39909,40607,40934,42748,43216,43528,45295,48761,49052,	YES
chr10	15327363	15332941	TCONS_00006628	1000	+	0	0	0	5	341,42,81,170,118,	0,1289,1703,5169,5460,	YES
chr10	15349783	15368964	TCONS_00008038	1000	-	0	0	0	15	547,91,88,219,143,81,54,99,79,104,175,67,94,76,368,	0,3797,4078,6621,8494,8722,11307,11449,11628,14383,14614,16062,16223,17914,18813,	YES
chr10	15349783	15368964	TCONS_00008039	1000	-	0	0	0	17	547,91,88,223,143,81,54,99,79,104,175,67,94,76,139,180,368,	0,3797,4078,6621,8494,8722,11307,11449,11628,14383,14614,16062,16223,16402,17572,17810,18813,	YES
chr10	15349783	15368964	TCONS_00008040	1000	-	0	0	0	17	547,89,92,223,143,81,54,99,79,104,175,67,94,76,139,180,368,	0,3797,4074,6621,8494,8722,11307,11449,11628,14383,14614,16062,16223,16402,17572,17810,18813,	YES
chr10	15349783	15368991	TCONS_00008041	1000	-	0	0	0	18	547,91,88,223,143,81,54,99,79,104,175,67,94,76,139,180,76,63,	0,3797,4078,6621,8494,8722,11307,11449,11628,14383,14614,16062,16223,16402,17572,17810,18813,19145,	YES
chr10	15350101	15368964	TCONS_00008042	1000	-	0	0	0	18	229,89,92,223,143,81,54,99,79,104,175,67,94,76,139,180,76,36,	0,3479,3756,6303,8176,8404,10989,11131,11310,14065,14296,15744,15905,16084,17254,17492,18495,18827,	YES
chr10	15365883	15368906	TCONS_00008043	1000	-	0	0	0	4	29,94,76,310,	0,123,1814,2713,	YES
chr10	15366006	15368936	TCONS_00008044	1000	-	0	0	0	5	94,76,139,180,340,	0,179,1349,1587,2590,	YES
chr10	15369341	15404067	TCONS_00006631	1000	+	0	0	0	12	306,69,100,85,128,73,45,134,199,101,148,41,	0,967,5147,10635,10798,15175,15481,20521,23486,31926,32097,34685,	YES
chr10	15369341	15410459	TCONS_00006632	1000	+	0	0	0	12	306,69,100,85,128,73,45,134,202,101,148,290,	0,967,5147,10635,10798,15175,15481,20521,23483,31926,32097,40828,	YES
chr10	15369341	15410824	TCONS_00006633	1000	+	0	0	0	12	306,69,100,85,128,73,45,134,199,101,148,655,	0,967,5147,10635,10798,15175,15481,20521,23486,31926,32097,40828,	YES
chr10	15410545	15434138	TCONS_00008045	1000	-	0	0	0	12	1054,121,84,38,63,139,105,100,76,104,105,101,	0,5973,6268,9824,16313,16574,18020,18406,18677,18831,20983,23492,	YES
chr10	15437163	15476154	TCONS_00006634	1000	+	0	0	0	13	140,260,149,105,103,161,136,143,186,187,129,137,258,	0,621,4657,8567,9978,10163,12497,25643,28023,29772,31805,35868,38733,	YES
chr10	15437163	15476192	TCONS_00006635	1000	+	0	0	0	13	44,260,149,105,103,161,136,143,186,187,129,137,296,	0,621,4657,8567,9978,10163,12497,25643,28023,29772,31805,35868,38733,	YES
chr10	15437163	15476192	TCONS_00006636	1000	+	0	0	0	13	44,260,149,105,103,161,136,367,202,187,129,137,296,	0,621,4657,8567,9978,10163,12497,25643,28007,29772,31805,35868,38733,	YES
chr10	15437262	15476159	TCONS_00006637	1000	+	0	0	0	14	41,260,149,105,103,161,136,143,164,202,187,129,137,263,	0,522,4558,8468,9879,10064,12398,25544,25747,27908,29673,31706,35769,38634,	YES
chr10	15483429	15625084	TCONS_00006638	1000	+	0	0	0	25	435,208,118,79,90,57,64,75,145,73,130,116,70,100,122,174,177,118,184,1462,57,174,93,75,520,	0,57031,60156,67050,67226,70366,77944,78231,86000,90931,96628,98308,101020,108629,114095,120437,120745,126127,126395,127178,136664,138406,138712,140972,141135,	YES
chr10	15483429	15627710	TCONS_00006639	1000	+	0	0	0	27	435,69,91,118,79,90,57,64,75,145,73,130,116,70,103,122,174,177,118,195,1466,45,99,174,93,75,3146,	0,57031,57148,60156,67050,67226,70366,77944,78231,86000,90931,96628,98308,101020,108626,114095,120437,120745,126127,126380,127174,133684,133999,138406,138712,140972,141135,	YES
chr10	15483429	15627710	TCONS_00006640	1000	+	0	0	0	26	435,69,91,118,79,90,57,64,75,145,73,130,116,70,100,122,174,177,118,184,1462,57,174,93,75,3146,	0,57031,57148,60156,67050,67226,70366,77944,78231,86000,90931,96628,98308,101020,108629,114095,120437,120745,126127,126395,127178,136664,138406,138712,140972,141135,	YES
chr10	15483468	15606370	TCONS_00006641	1000	+	0	0	0	18	396,69,91,118,79,90,57,64,75,145,73,130,116,70,100,122,174,2196,	0,56992,57109,60117,67011,67187,70327,77905,78192,85961,90892,96589,98269,100981,108590,114056,120398,120706,	YES
chr10	15540479	15624672	TCONS_00006642	1000	+	0	0	0	25	189,118,79,90,57,64,75,145,73,130,116,70,103,122,174,177,118,195,1466,45,99,174,93,75,108,	0,3106,10000,10176,13316,20894,21181,28950,33881,39578,41258,43970,51576,57045,63387,63695,69077,69330,70124,76634,76949,81356,81662,83922,84085,	YES
chr10	15560889	15561791	TCONS_00006643	1000	+	0	0	0	2	548,131,	0,771,	YES
chr10	1560803	1577232	TCONS_00007643	1000	-	0	0	0	19	149,111,56,145,132,34,36,123,91,260,178,137,72,135,49,85,167,864,115,	0,1982,2178,4392,4654,4858,5046,6527,6757,7035,7947,8579,9854,10359,12205,12467,12647,14904,16314,	YES
chr10	1560803	1595574	TCONS_00007644	1000	-	0	0	0	34	149,111,56,145,132,34,36,123,91,260,178,137,135,49,85,167,864,258,142,59,68,134,107,760,280,127,147,96,121,165,218,116,238,186,	0,1982,2178,4392,4654,4858,5046,6527,6757,7035,7947,8579,10359,12205,12467,12647,14904,16314,18548,19391,21478,21736,22524,23314,25166,26014,27954,28212,28406,28812,29248,31218,31797,34585,	YES
chr10	1560803	1615180	TCONS_00007645	1000	-	0	0	0	51	149,111,56,145,132,34,36,123,91,260,178,137,72,135,49,85,167,864,258,142,39,59,68,134,152,760,280,127,147,96,121,165,218,116,238,153,159,81,191,623,138,250,183,104,157,107,239,120,136,142,74,	0,1982,2178,4392,4654,4858,5046,6527,6757,7035,7947,8579,9854,10359,12205,12467,12647,14904,16314,18548,18769,19391,21478,21736,22479,23314,25166,26014,27954,28212,28406,28812,29248,31218,31797,34585,34917,35249,36718,37995,38739,40617,42103,42592,45729,46786,46965,48961,51023,53821,54303,	YES
chr10	1560803	1615180	TCONS_00007646	1000	-	0	0	0	51	149,111,56,145,132,34,36,123,91,260,178,137,72,135,49,85,167,864,258,142,39,59,68,134,152,760,280,127,147,110,121,165,218,116,238,153,159,81,191,623,138,250,183,104,157,107,239,120,136,142,74,	0,1982,2178,4392,4654,4858,5046,6527,6757,7035,7947,8579,9854,10359,12205,12467,12647,14904,16314,18548,18769,19391,21478,21736,22479,23314,25166,26014,27954,28212,28406,28812,29248,31218,31797,34585,34917,35249,36718,37995,38739,40617,42103,42592,45729,46786,46965,48961,51023,53821,54303,	YES
chr10	15631655	15641876	TCONS_00006644	1000	+	0	0	0	5	112,178,207,126,1252,	0,5223,5502,8716,8969,	YES
chr10	15631657	15633717	TCONS_00006645	1000	+	0	0	0	2	114,709,	0,1351,	YES
chr10	15646671	15673514	TCONS_00008046	1000	-	0	0	0	16	400,96,180,120,105,96,129,123,124,170,174,135,163,53,142,237,	0,469,3323,4530,4722,4987,5176,11242,11511,11724,13235,24171,24437,24683,26324,26606,	YES
chr10	15646672	15673509	TCONS_00008047	1000	-	0	0	0	19	399,96,180,120,105,96,129,123,124,68,6,57,162,141,135,163,53,142,232,	0,468,3322,4529,4721,4986,5175,11241,11510,11723,15915,19602,19740,20879,24170,24436,24682,26323,26605,	YES
chr10	15646789	15647589	TCONS_00008048	1000	-	0	0	0	2	282,449,	0,351,	YES
chr10	15646792	15673429	TCONS_00008049	1000	-	0	0	0	24	279,96,180,120,105,96,129,123,124,170,174,133,95,114,155,256,72,162,141,135,163,53,142,152,	0,348,3202,4409,4601,4866,5055,11121,11390,11603,13114,16566,16781,18680,18875,19118,19467,19620,20759,24050,24316,24562,26203,26485,	YES
chr10	15651471	15659932	TCONS_00008050	1000	-	0	0	0	6	27,318,123,124,170,26,	0,187,6442,6711,6924,8435,	YES
chr10	15665763	15673478	TCONS_00008051	1000	-	0	0	0	10	59,256,72,162,141,135,163,53,142,201,	0,147,496,649,1788,5079,5345,5591,7232,7514,	YES
chr10	15805804	15841853	TCONS_00006648	1000	+	0	0	0	13	101,1620,102,40,146,33,90,204,180,213,120,141,405,	0,6149,9024,9225,11249,11876,12091,17820,18104,25895,31759,31943,35644,	YES
chr10	15805831	15841853	TCONS_00006649	1000	+	0	0	0	12	74,1620,102,40,146,90,204,180,213,120,141,405,	0,6122,8997,9198,11222,12064,17793,18077,25868,31732,31916,35617,	YES
chr10	15811998	15841848	TCONS_00006650	1000	+	0	0	0	12	1575,102,40,146,33,90,204,180,213,120,141,400,	0,2830,3031,5055,5682,5897,11626,11910,19701,25565,25749,29450,	YES
chr10	15844440	15872808	TCONS_00008053	1000	-	0	0	0	22	1097,83,279,102,222,101,211,80,96,185,220,109,151,103,119,112,154,104,724,103,125,45,	0,2620,4176,7055,8712,10342,10532,10819,10995,11366,13334,13804,14008,14973,15250,19013,20901,22634,22817,23703,25222,28323,	YES
chr10	15844440	15883274	TCONS_00008054	1000	-	0	0	0	23	1097,83,279,102,222,101,211,80,96,185,220,109,151,103,119,112,154,104,724,103,125,54,161,	0,2620,4176,7055,8712,10342,10532,10819,10995,11366,13334,13804,14008,14973,15250,19013,20901,22634,22817,23703,25222,28323,38673,	YES
chr10	15844450	15908143	TCONS_00008055	1000	-	0	0	0	24	1087,83,279,102,222,101,211,80,96,185,220,109,151,103,119,112,154,104,724,103,125,54,130,143,	0,2610,4166,7045,8702,10332,10522,10809,10985,11356,13324,13794,13998,14963,15240,19003,20891,22624,22807,23693,25212,28313,44643,63550,	YES
chr10	1592039	1615180	TCONS_00007649	1000	-	0	0	0	18	98,229,153,159,81,191,623,138,250,183,104,157,107,239,120,136,142,74,	0,561,3349,3681,4013,5482,6759,7503,9381,10867,11356,14493,15550,15729,17725,19787,22585,23067,	YES
chr10	15996200	16021836	TCONS_00006657	1000	+	0	0	0	12	133,757,191,77,61,147,128,115,73,81,113,405,	0,7286,13027,17621,18429,18561,18929,21126,22753,22903,25000,25231,	YES
chr10	15996200	16031899	TCONS_00006658	1000	+	0	0	0	14	133,757,191,57,77,61,147,128,115,73,81,113,177,5785,	0,7286,13027,16716,17621,18429,18561,18929,21126,22753,22903,25000,25231,29914,	YES
chr10	15996216	16021836	TCONS_00006659	1000	+	0	0	0	13	117,757,191,57,77,61,147,128,115,73,81,113,405,	0,7270,13011,16700,17605,18413,18545,18913,21110,22737,22887,24984,25215,	YES
chr10	15996216	16026488	TCONS_00006660	1000	+	0	0	0	13	117,757,191,77,61,147,128,115,73,81,113,177,375,	0,7270,13011,17605,18413,18545,18913,21110,22737,22887,24984,25215,29897,	YES
chr10	15996216	16031899	TCONS_00006661	1000	+	0	0	0	13	117,757,191,77,61,147,128,115,73,81,113,177,5786,	0,7270,13011,17605,18413,18545,18913,21110,22737,22887,24984,25215,29897,	YES
chr10	15996216	16031899	TCONS_00006662	1000	+	0	0	0	14	117,757,191,57,77,61,147,128,115,73,81,113,177,5786,	0,7270,13011,16700,17605,18413,18545,18913,21110,22737,22887,24984,25215,29897,	YES
chr10	16003495	16031616	TCONS_00006663	1000	+	0	0	0	13	748,191,57,77,61,147,128,115,73,81,113,177,5502,	0,5732,9421,10326,11134,11266,11634,13831,15458,15608,17705,17936,22619,	YES
chr10	16014770	16021836	TCONS_00006664	1000	+	0	0	0	7	138,128,115,73,81,113,405,	0,359,2556,4183,4333,6430,6661,	YES
chr10	16035478	16056656	TCONS_00008062	1000	-	0	0	0	18	236,76,74,98,117,107,85,95,42,98,78,45,133,124,81,66,54,290,	0,350,3011,3198,3382,5189,8357,8544,9158,10448,10709,12554,12696,12921,13123,17283,17449,20888,	YES
chr10	16057833	16063987	TCONS_00006665	1000	+	0	0	0	5	156,587,121,84,838,	0,1888,3475,4247,5316,	YES
chr10	16064817	16085482	TCONS_00006666	1000	+	0	0	0	12	45,369,157,126,171,126,221,226,105,120,111,1111,	0,322,3197,4333,7052,7379,11340,13200,14666,14916,16236,19554,	YES
chr10	16064819	16072322	TCONS_00006667	1000	+	0	0	0	6	43,369,157,171,171,126,	0,320,3195,4286,7050,7377,	YES
chr10	16064819	16085482	TCONS_00006668	1000	+	0	0	0	12	43,369,157,171,171,126,221,226,105,120,111,1111,	0,320,3195,4286,7050,7377,11338,13198,14664,14914,16234,19552,	YES
chr10	16064839	16068124	TCONS_00006669	1000	+	0	0	0	2	669,110,	0,3175,	YES
chr10	16064853	16085481	TCONS_00006670	1000	+	0	0	0	12	133,369,157,126,171,126,221,226,105,120,111,1110,	0,286,3161,4297,7016,7343,11304,13164,14630,14880,16200,19518,	YES
chr10	16064853	16085482	TCONS_00006671	1000	+	0	0	0	12	133,369,157,171,171,126,221,226,105,120,111,1111,	0,286,3161,4252,7016,7343,11304,13164,14630,14880,16200,19518,	YES
chr10	16065480	16068782	TCONS_00006672	1000	+	0	0	0	2	28,768,	0,2534,	YES
chr10	16088075	16095768	TCONS_00008063	1000	-	0	0	0	4	2807,57,95,45,	0,2890,5576,7648,	YES
chr10	16098560	16189614	TCONS_00006673	1000	+	0	0	0	25	133,119,102,101,93,247,118,137,213,175,121,164,103,147,133,131,129,129,129,228,116,124,45,207,200,	0,22708,24915,25681,30502,38988,39369,39664,48042,56655,56924,58614,60074,71340,71598,72370,76699,76939,77177,79734,80132,81648,82784,85762,90854,	YES
chr10	16098560	16190833	TCONS_00006674	1000	+	0	0	0	24	133,119,102,101,93,247,121,137,175,121,164,103,147,135,129,129,129,129,228,116,124,45,207,1419,	0,22708,24915,25681,30502,38988,39369,39664,56655,56924,58614,60074,71340,71598,72372,76699,76939,77177,79734,80132,81648,82784,85762,90854,	YES
chr10	16098560	16190833	TCONS_00006675	1000	+	0	0	0	25	133,119,102,101,93,247,121,137,213,175,121,164,103,147,135,129,129,129,129,228,116,124,45,207,1419,	0,22708,24915,25681,30502,38988,39369,39664,48042,56655,56924,58614,60074,71340,71598,72372,76699,76939,77177,79734,80132,81648,82784,85762,90854,	YES
chr10	16194029	16215265	TCONS_00006677	1000	+	0	0	0	9	154,98,390,143,103,164,104,103,1233,	0,3063,7750,11152,11373,12963,13539,16406,20003,	YES
chr10	16194073	16215265	TCONS_00006678	1000	+	0	0	0	8	110,98,143,103,164,104,103,1233,	0,3019,11108,11329,12919,13495,16362,19959,	YES
chr10	16194106	16215265	TCONS_00006679	1000	+	0	0	0	9	77,103,390,143,103,164,104,103,1233,	0,2981,7673,11075,11296,12886,13462,16329,19926,	YES
chr10	1623247	1663150	TCONS_00007651	1000	-	0	0	0	33	955,107,137,111,121,114,125,155,105,154,136,139,192,134,104,116,67,151,86,95,111,171,272,95,92,74,264,93,71,97,138,167,103,	0,1033,2822,3407,5591,5786,7372,7737,7971,9170,10713,11100,12542,13049,13268,14297,14961,15129,18645,20907,22692,23137,23867,25250,28289,28457,29926,31019,32422,32567,34780,38536,39800,	YES
chr10	1623247	1663179	TCONS_00007652	1000	-	0	0	0	34	955,107,137,111,121,114,130,155,105,154,136,139,192,134,104,116,67,151,63,86,95,111,171,269,98,92,74,264,93,71,97,138,167,132,	0,1033,2822,3407,5591,5786,7372,7737,7971,9170,10713,11100,12542,13049,13268,14297,14961,15129,17230,18645,20907,22692,23137,23867,25247,28289,28457,29926,31019,32422,32567,34780,38536,39800,	YES
chr10	1623967	1651778	TCONS_00007653	1000	-	0	0	0	27	235,107,137,111,121,114,130,155,105,154,136,139,192,134,104,116,67,151,63,86,95,111,171,269,98,92,74,	0,313,2102,2687,4871,5066,6652,7017,7251,8450,9993,10380,11822,12329,12548,13577,14241,14409,16510,17925,20187,21972,22417,23147,24527,27569,27737,	YES
chr10	1623968	1663150	TCONS_00007654	1000	-	0	0	0	34	234,107,137,111,121,114,130,155,105,154,136,139,192,134,104,116,67,151,63,86,95,111,171,272,95,92,74,264,93,71,97,138,167,103,	0,312,2101,2686,4870,5065,6651,7016,7250,8449,9992,10379,11821,12328,12547,13576,14240,14408,16509,17924,20186,21971,22416,23146,24529,27568,27736,29205,30298,31701,31846,34059,37815,39079,	YES
chr10	16253954	16275795	TCONS_00006681	1000	+	0	0	0	2	1017,54,	0,21787,	YES
chr10	16254126	16292898	TCONS_00006682	1000	+	0	0	0	4	845,120,76,96,	0,36977,38301,38676,	YES
chr10	162943	167704	TCONS_00006178	1000	+	0	0	0	4	41,58,62,1591,	0,119,3022,3170,	YES
chr10	16426498	16446293	TCONS_00008071	1000	-	0	0	0	10	2658,131,98,199,81,195,125,159,207,541,	0,4473,6271,8617,11806,12030,12371,12681,16139,19254,	YES
chr10	16426498	16446319	TCONS_00008072	1000	-	0	0	0	10	2658,131,98,199,81,158,125,159,207,567,	0,4473,6271,8617,11806,12030,12371,12681,16139,19254,	YES
chr10	16426984	16446293	TCONS_00008073	1000	-	0	0	0	10	2172,131,98,199,91,195,125,159,207,541,	0,3987,5785,8131,11310,11544,11885,12195,15653,18768,	YES
chr10	16452402	16492507	TCONS_00006683	1000	+	0	0	0	8	592,210,195,91,199,98,131,1573,	0,2088,20762,25902,28713,29033,33927,38532,	YES
chr10	16452441	16492507	TCONS_00006684	1000	+	0	0	0	10	553,210,159,125,195,91,199,98,131,1573,	0,2049,9016,13365,20723,25863,28674,28994,33888,38493,	YES
chr10	16452474	16491111	TCONS_00006685	1000	+	0	0	0	10	520,210,159,125,195,91,199,98,131,177,	0,2016,8983,13332,20690,25830,28641,28961,33855,38460,	YES
chr10	16497982	16511193	TCONS_00006686	1000	+	0	0	0	5	203,120,204,117,25,	0,2887,10004,12126,13186,	YES
chr10	16497982	16514677	TCONS_00006687	1000	+	0	0	0	5	280,120,204,117,1659,	0,2887,10004,12126,15036,	YES
chr10	16497998	16519602	TCONS_00006688	1000	+	0	0	0	6	264,120,204,117,141,1041,	0,2871,9988,12110,15020,20563,	YES
chr10	16543641	16699699	TCONS_00006691	1000	+	0	0	0	3	610,284,2720,	0,5080,153338,	YES
chr10	165898	173074	TCONS_00007604	1000	-	0	0	0	5	2766,119,73,103,207,	0,3497,3707,6761,6969,	YES
chr10	16754960	16757202	TCONS_00006692	1000	+	0	0	0	2	438,407,	0,1835,	NO
chr10	16848998	16888981	TCONS_00008075	1000	-	0	0	0	23	2991,68,136,87,112,123,48,123,74,107,141,112,100,156,102,124,108,164,85,125,109,111,141,	0,5910,6661,8069,8748,15738,16216,20110,20593,22636,23344,26207,32469,32664,35878,36058,36319,38267,38508,38687,38917,39603,39842,	NO
chr10	16848998	16888981	TCONS_00008076	1000	-	0	0	0	23	2991,68,136,87,112,123,48,123,80,107,141,112,100,156,102,124,108,164,85,125,109,111,141,	0,5910,6661,8069,8748,15738,16216,20110,20587,22636,23344,26207,32469,32664,35878,36058,36319,38267,38508,38687,38917,39603,39842,	NO
chr10	16851853	16888981	TCONS_00008077	1000	-	0	0	0	23	136,68,136,87,112,123,48,123,80,107,141,112,100,156,102,124,108,164,85,125,109,111,141,	0,3055,3806,5214,5893,12883,13361,17255,17732,19781,20489,23352,29614,29809,33023,33203,33464,35412,35653,35832,36062,36748,36987,	NO
chr10	16851853	16888981	TCONS_00008078	1000	-	0	0	0	22	136,68,136,87,112,123,123,80,107,141,112,100,156,102,124,108,164,85,125,109,111,141,	0,3055,3806,5214,5893,12883,17255,17732,19781,20489,23352,29614,29809,33023,33203,33464,35412,35653,35832,36062,36748,36987,	NO
chr10	168560	173059	TCONS_00007605	1000	-	0	0	0	5	104,119,73,103,192,	0,835,1045,4099,4307,	YES
chr10	16918667	16927369	TCONS_00006694	1000	+	0	0	0	11	50,88,92,75,102,65,52,82,71,120,360,	0,431,1975,3445,3608,3802,3955,5235,5405,8139,8342,	YES
chr10	16918677	16927358	TCONS_00006695	1000	+	0	0	0	11	40,88,92,75,102,65,52,82,91,120,349,	0,421,1965,3435,3598,3792,3945,5225,5395,8129,8332,	YES
chr10	16928894	16979791	TCONS_00006697	1000	+	0	0	0	41	500,88,47,86,84,50,70,79,62,70,73,104,75,135,62,74,70,37,121,215,201,136,98,54,184,158,121,168,232,134,112,137,81,133,106,240,170,172,61,83,779,	0,575,1246,2266,2439,2608,3374,3521,3685,5962,6112,7144,7995,8148,8361,10244,12046,12241,12375,16047,16353,19203,19428,21849,25270,29343,29614,29835,36180,36510,36825,42078,42305,42475,42690,45494,47543,47830,49156,49933,50118,	YES
chr10	16928928	16979791	TCONS_00006698	1000	+	0	0	0	41	466,88,47,86,84,50,70,79,62,70,73,104,75,135,62,74,70,37,121,215,201,136,98,54,193,158,121,168,232,134,112,137,81,133,106,240,170,172,61,83,779,	0,541,1212,2232,2405,2574,3340,3487,3651,5928,6078,7110,7961,8114,8327,10210,12012,12207,12341,16013,16319,19169,19394,21815,25227,29309,29580,29801,36146,36476,36791,42044,42271,42441,42656,45460,47509,47796,49122,49899,50084,	YES
chr10	16928928	16979791	TCONS_00006699	1000	+	0	0	0	42	466,88,47,86,84,50,70,79,62,70,73,104,75,135,62,74,70,37,121,215,201,136,98,54,157,158,121,168,232,134,112,63,137,81,133,106,240,170,172,61,83,779,	0,541,1212,2232,2405,2574,3340,3487,3651,5928,6078,7110,7961,8114,8327,10210,12012,12207,12341,16013,16319,19169,19394,21815,25263,29309,29580,29801,36146,36476,36791,38969,42044,42271,42441,42656,45460,47509,47796,49122,49899,50084,	YES
chr10	16928948	16979791	TCONS_00006700	1000	+	0	0	0	42	446,88,47,86,84,50,70,79,62,70,73,104,75,135,62,74,70,37,121,215,201,136,98,54,184,158,121,168,232,134,112,63,137,81,133,106,240,170,172,61,83,779,	0,521,1192,2212,2385,2554,3320,3467,3631,5908,6058,7090,7941,8094,8307,10190,11992,12187,12321,15993,16299,19149,19374,21795,25216,29289,29560,29781,36126,36456,36771,38949,42024,42251,42421,42636,45440,47489,47776,49102,49879,50064,	YES
chr10	16928966	16979446	TCONS_00006701	1000	+	0	0	0	41	428,88,47,86,84,50,70,79,62,70,73,104,75,135,62,74,70,37,181,155,201,136,83,54,157,158,121,168,232,134,112,137,81,133,106,240,170,172,61,83,434,	0,503,1174,2194,2367,2536,3302,3449,3613,5890,6040,7072,7923,8076,8289,10172,11974,12169,12303,16035,16281,19131,19356,21777,25225,29271,29542,29763,36108,36438,36753,42006,42233,42403,42618,45422,47471,47758,49084,49861,50046,	YES
chr10	16928966	16979791	TCONS_00006702	1000	+	0	0	0	42	428,88,47,86,84,50,70,79,62,70,73,104,75,135,62,74,70,37,121,215,201,136,98,54,184,158,121,168,232,134,112,63,137,81,133,106,180,170,172,61,83,779,	0,503,1174,2194,2367,2536,3302,3449,3613,5890,6040,7072,7923,8076,8289,10172,11974,12169,12303,15975,16281,19131,19356,21777,25198,29271,29542,29763,36108,36438,36753,38931,42006,42233,42403,42618,45422,47471,47758,49084,49861,50046,	YES
chr10	16928966	16979791	TCONS_00006703	1000	+	0	0	0	42	428,88,47,86,84,50,70,79,62,70,73,104,75,135,62,74,70,37,121,215,201,136,83,54,157,158,121,168,232,134,112,63,137,81,133,106,180,170,172,61,83,779,	0,503,1174,2194,2367,2536,3302,3449,3613,5890,6040,7072,7923,8076,8289,10172,11974,12169,12303,15975,16281,19131,19356,21777,25225,29271,29542,29763,36108,36438,36753,38931,42006,42233,42403,42618,45422,47471,47758,49084,49861,50046,	YES
chr10	16929336	16979308	TCONS_00006704	1000	+	0	0	0	44	58,88,47,86,84,50,70,79,62,70,73,104,75,135,62,74,70,37,121,215,201,136,98,54,193,158,121,168,232,134,112,63,108,29,13,86,133,118,216,170,172,61,83,296,	0,133,804,1824,1997,2166,2932,3079,3243,5520,5670,6702,7553,7706,7919,9802,11604,11799,11933,15605,15911,18761,18986,21407,24819,28901,29172,29393,35738,36068,36383,38561,39936,40642,41064,41858,42033,42248,45076,47101,47388,48714,49491,49676,	YES
chr10	16965235	16971038	TCONS_00006705	1000	+	0	0	0	5	71,134,112,63,66,	0,169,484,2662,5737,	YES
chr10	16970902	16971678	TCONS_00006706	1000	+	0	0	0	4	207,81,133,94,	0,297,467,682,	YES
chr10	16971634	16979086	TCONS_00006707	1000	+	0	0	0	7	56,180,170,172,61,83,74,	0,2754,4803,5090,6416,7193,7378,	YES
chr10	16976239	16978091	TCONS_00006708	1000	+	0	0	0	3	368,172,41,	0,485,1811,	YES
chr10	16980963	16985015	TCONS_00006709	1000	+	0	0	0	2	406,2076,	0,1976,	YES
chr10	1708215	1711580	TCONS_00006253	1000	+	0	0	0	2	270,720,	0,2645,	YES
chr10	17128335	17237271	TCONS_00008096	1000	-	0	0	0	38	510,278,160,93,148,78,51,124,147,89,78,78,144,97,127,86,131,141,90,69,151,164,116,170,142,228,220,75,79,47,91,297,214,58,74,124,118,5,	0,2778,5484,5722,8396,9382,10563,11845,12036,13445,22257,23314,24651,25588,25762,26181,26358,27794,28034,28211,30866,34037,34289,41457,43989,44823,46039,46359,47866,48109,61487,62261,73965,76015,82681,86544,87260,108931,	YES
chr10	17128335	17279126	TCONS_00008097	1000	-	0	0	0	41	510,278,160,93,57,148,78,51,124,147,89,78,78,144,97,127,86,131,141,90,69,151,164,116,170,142,228,220,75,79,47,91,297,214,58,74,124,118,100,30,222,	0,2778,5484,5722,8108,8396,9382,10563,11845,12036,13445,22257,23314,24651,25588,25762,26181,26358,27794,28034,28211,30866,34037,34289,41457,43989,44823,46039,46359,47866,48109,61487,62261,73965,76015,82681,86544,87260,108931,135579,150569,	YES
chr10	17128335	17279153	TCONS_00008098	1000	-	0	0	0	40	510,278,160,93,148,78,51,124,147,89,78,78,144,97,127,86,131,141,90,69,151,164,116,170,142,228,220,75,79,47,91,297,214,58,74,124,118,100,30,249,	0,2778,5484,5722,8396,9382,10563,11845,12036,13445,22257,23314,24651,25588,25762,26181,26358,27794,28034,28211,30866,34037,34289,41457,43989,44823,46039,46359,47866,48109,61487,62261,73965,76015,82681,86544,87260,108931,135579,150569,	YES
chr10	17130748	17279126	TCONS_00008099	1000	-	0	0	0	39	643,160,93,148,78,51,124,147,89,78,78,144,97,127,86,131,141,90,69,151,164,116,170,142,228,220,75,79,47,91,297,214,58,74,124,118,100,30,222,	0,3071,3309,5983,6969,8150,9432,9623,11032,19844,20901,22238,23175,23349,23768,23945,25381,25621,25798,28453,31624,31876,39044,41576,42410,43626,43946,45453,45696,59074,59848,71552,73602,80268,84131,84847,106518,133166,148156,	YES
chr10	1713672	1723735	TCONS_00007655	1000	-	0	0	0	5	650,173,185,184,51,	0,1898,7402,7675,10012,	YES
chr10	1713681	1723746	TCONS_00007656	1000	-	0	0	0	5	641,173,185,362,62,	0,1889,7393,7666,10003,	YES
chr10	1714156	1723772	TCONS_00007657	1000	-	0	0	0	4	166,173,635,88,	0,1414,6918,9528,	YES
chr10	17282808	17288960	TCONS_00006718	1000	+	0	0	0	7	185,141,100,59,102,135,150,	0,839,1065,1534,1666,5771,6002,	YES
chr10	17282948	17288957	TCONS_00006719	1000	+	0	0	0	7	45,153,100,59,102,135,147,	0,687,925,1394,1526,5631,5862,	YES
chr10	1734813	1740263	TCONS_00006254	1000	+	0	0	0	4	3957,54,114,1091,	0,4017,4125,4359,	NO
chr10	1734813	1744616	TCONS_00007658	1000	-	0	0	0	4	4094,1170,49,129,	0,4154,5413,9674,	YES
chr10	1734813	1745106	TCONS_00007659	1000	-	0	0	0	4	4094,1170,49,265,	0,4154,5413,10028,	YES
chr10	17359361	17464098	TCONS_00006720	1000	+	0	0	0	10	151,78,92,120,79,113,107,355,110,1342,	0,75443,81035,86790,87039,89986,90253,94733,98482,103395,	YES
chr10	17359361	17464927	TCONS_00006721	1000	+	0	0	0	10	151,78,92,120,79,113,107,355,110,2171,	0,75443,81035,86790,87039,89986,90253,94733,98482,103395,	YES
chr10	173722	201891	TCONS_00006179	1000	+	0	0	0	46	126,67,43,160,79,66,130,86,95,63,55,163,49,82,37,61,106,144,81,107,127,120,102,93,65,134,315,273,47,57,86,156,412,66,150,140,69,97,104,85,102,131,130,138,93,526,	0,1112,3198,4965,5234,5383,5977,7605,8646,8822,8967,10542,10997,11117,12964,14595,14986,15293,15653,15868,16050,16369,17196,17382,17726,17873,19570,20146,20491,21216,21721,21890,22309,22874,23190,23430,23860,24081,24442,24637,26284,26620,26840,27121,27402,27643,	YES
chr10	173852	201891	TCONS_00006180	1000	+	0	0	0	46	100,67,43,160,79,66,130,86,95,63,55,163,49,82,37,61,106,144,81,107,127,120,102,93,65,134,315,273,47,57,86,156,412,66,150,140,69,97,104,85,102,131,130,138,93,526,	0,982,3068,4835,5104,5253,5847,7475,8516,8692,8837,10412,10867,10987,12834,14465,14856,15163,15523,15738,15920,16239,17066,17252,17596,17743,19440,20016,20361,21086,21591,21760,22179,22744,23060,23300,23730,23951,24312,24507,26154,26490,26710,26991,27272,27513,	YES
chr10	173888	188841	TCONS_00006181	1000	+	0	0	0	17	64,67,43,160,79,66,127,86,95,63,55,163,49,82,37,61,133,	0,946,3032,4799,5068,5217,5814,7439,8480,8656,8801,10376,10831,10951,12798,14429,14820,	YES
chr10	1739506	1745093	TCONS_00007660	1000	-	0	0	0	3	631,49,252,	0,720,5335,	YES
chr10	17402446	17464927	TCONS_00006722	1000	+	0	0	0	10	23,78,92,120,79,113,107,355,110,2171,	0,32358,37950,43705,43954,46901,47168,51648,55397,60310,	YES
chr10	174835	188841	TCONS_00006182	1000	+	0	0	0	16	66,43,160,79,66,130,86,95,63,55,163,49,82,37,61,133,	0,2085,3852,4121,4270,4864,6492,7533,7709,7854,9429,9884,10004,11851,13482,13873,	YES
chr10	17490577	17514982	TCONS_00008102	1000	-	0	0	0	18	581,84,177,61,52,171,67,102,42,84,54,61,58,92,96,118,74,244,	0,887,2188,2630,3262,4253,4519,6417,6606,6779,9178,13296,15639,15779,17827,20324,20530,24161,	YES
chr10	17490577	17549254	TCONS_00008103	1000	-	0	0	0	18	581,84,177,61,52,171,67,102,42,84,54,94,58,92,96,24,94,72,	0,887,2188,2630,3262,4253,4519,6417,6606,6779,9178,13263,15639,15779,17827,20324,58423,58605,	YES
chr10	17490577	17549254	TCONS_00008104	1000	-	0	0	0	16	581,84,177,61,52,171,67,102,42,84,54,94,148,100,117,72,	0,887,2188,2630,3262,4253,4519,6417,6606,6779,9178,13263,53430,55288,58400,58605,	YES
chr10	17490578	17514957	TCONS_00008105	1000	-	0	0	0	18	580,84,177,61,52,171,67,102,42,84,54,94,58,92,96,118,74,219,	0,886,2187,2629,3261,4252,4518,6416,6605,6778,9177,13262,15638,15778,17826,20323,20529,24160,	YES
chr10	17491008	17493637	TCONS_00008106	1000	-	0	0	0	4	150,84,177,430,	0,456,1757,2199,	YES
chr10	17492762	17497210	TCONS_00008107	1000	-	0	0	0	7	180,61,52,171,67,159,27,	0,445,1077,2068,2334,4175,4421,	YES
chr10	17516164	17531748	TCONS_00008108	1000	-	0	0	0	12	837,128,76,102,111,191,149,130,125,57,99,52,	0,1758,1992,6046,6266,7538,11698,12929,13147,14954,15361,15532,	NO
chr10	17516164	17531748	TCONS_00008109	1000	-	0	0	0	12	837,128,76,102,111,191,149,130,125,161,99,52,	0,1758,1992,6046,6266,7538,11698,12929,13147,14954,15361,15532,	NO
chr10	17516168	17531748	TCONS_00008110	1000	-	0	0	0	12	833,128,76,102,111,193,147,130,125,161,99,52,	0,1754,1988,6042,6262,7534,11696,12925,13143,14950,15357,15528,	NO
chr10	17523700	17531624	TCONS_00008111	1000	-	0	0	0	6	193,149,130,125,57,99,	0,4162,5393,5611,7418,7825,	NO
chr10	17540199	17549254	TCONS_00008112	1000	-	0	0	0	7	98,84,148,148,100,117,72,	0,229,1183,3808,5666,8778,8983,	NO
chr10	17573495	17580459	TCONS_00008114	1000	-	0	0	0	6	714,170,141,104,125,118,	0,982,3291,3602,6110,6846,	YES
chr10	17573899	17581151	TCONS_00008115	1000	-	0	0	0	7	310,170,141,104,125,90,115,	0,578,2887,3198,5706,6442,7137,	YES
chr10	17582952	17618052	TCONS_00008116	1000	-	0	0	0	23	340,110,183,119,189,116,118,96,132,136,76,60,100,91,197,419,79,93,89,49,169,130,373,	0,432,3030,7262,7654,10242,10434,10755,15261,15580,16081,17360,17507,18259,18447,19866,24416,24588,26685,26944,27094,30632,34727,	YES
chr10	17582952	17618092	TCONS_00008117	1000	-	0	0	0	22	340,110,183,119,189,116,118,96,132,76,60,100,91,197,419,79,93,89,49,169,130,413,	0,432,3030,7262,7654,10242,10434,10755,15261,16081,17360,17507,18259,18447,19866,24416,24588,26685,26944,27094,30632,34727,	YES
chr10	17593194	17600372	TCONS_00008118	1000	-	0	0	0	6	116,118,96,132,76,60,	0,192,513,5019,5839,7118,	YES
chr10	17711293	17721391	TCONS_00006729	1000	+	0	0	0	9	231,124,176,70,170,131,168,123,376,	0,458,3078,3448,3613,5035,5246,7209,9722,	YES
chr10	1772172	1815074	TCONS_00007664	1000	-	0	0	0	21	385,79,111,69,48,120,78,51,102,78,88,116,78,92,64,89,88,121,98,79,52,	0,2103,3975,4433,4590,6624,6930,8558,11078,12897,13829,18287,21223,25688,28749,29859,30616,37095,37432,39037,42850,	YES
chr10	1772175	1854334	TCONS_00007665	1000	-	0	0	0	23	382,79,111,69,48,120,78,51,102,78,88,116,78,92,64,89,88,121,98,79,52,105,388,	0,2100,3972,4430,4587,6621,6927,8555,11075,12894,13826,18284,21220,25685,28746,29856,30613,37092,37429,39034,42847,53433,81771,	YES
chr10	17730235	17740857	TCONS_00008120	1000	-	0	0	0	8	2481,85,100,83,111,50,161,335,	0,4350,4520,5099,8367,8673,8858,10287,	YES
chr10	17730235	17741532	TCONS_00008121	1000	-	0	0	0	8	2484,85,100,83,111,50,161,1010,	0,4350,4520,5099,8367,8673,8858,10287,	YES
chr10	17732546	17740971	TCONS_00008122	1000	-	0	0	0	8	173,85,100,83,111,50,161,449,	0,2039,2209,2788,6056,6362,6547,7976,	YES
chr10	17743364	17758385	TCONS_00006731	1000	+	0	0	0	11	291,752,141,86,97,120,231,547,186,85,1915,	0,1343,2737,2996,3729,7786,11490,11818,12612,12901,13106,	YES
chr10	17745085	17758385	TCONS_00006732	1000	+	0	0	0	10	374,141,86,97,120,231,547,186,85,1915,	0,1016,1275,2008,6065,9769,10097,10891,11180,11385,	YES
chr10	17746125	17751351	TCONS_00006733	1000	+	0	0	0	4	117,86,97,201,	0,235,968,5025,	YES
chr10	17746168	17751270	TCONS_00006734	1000	+	0	0	0	5	74,86,97,139,120,	0,192,925,1396,4982,	YES
chr10	17753748	17758385	TCONS_00006735	1000	+	0	0	0	6	34,231,547,186,85,1915,	0,1106,1434,2228,2517,2722,	YES
chr10	17778099	17790098	TCONS_00006736	1000	+	0	0	0	11	199,482,144,124,160,180,1546,204,194,71,1484,	0,2669,5326,5641,5881,6406,6723,8375,8713,9963,10515,	YES
chr10	17778099	17790098	TCONS_00006737	1000	+	0	0	0	11	199,482,144,124,160,180,1546,204,188,71,1484,	0,2669,5326,5641,5881,6406,6723,8375,8719,9963,10515,	YES
chr10	17780751	17788744	TCONS_00006738	1000	+	0	0	0	10	499,144,124,160,180,1546,204,194,71,130,	0,2674,2989,3229,3754,4071,5723,6061,7311,7863,	YES
chr10	178687	184417	TCONS_00006183	1000	+	0	0	0	9	160,79,66,127,86,95,63,55,153,	0,269,418,1015,2640,3681,3857,4002,5577,	YES
chr10	17881222	17953167	TCONS_00006741	1000	+	0	0	0	8	352,410,186,79,203,167,90,552,	0,25789,39824,60179,60425,62299,65007,71393,	YES
chr10	17966660	17976383	TCONS_00006746	1000	+	0	0	0	8	168,153,170,94,115,134,69,901,	0,3885,4126,7076,7250,7464,8661,8822,	YES
chr10	17966701	17976383	TCONS_00006747	1000	+	0	0	0	8	127,206,170,94,115,134,69,901,	0,3791,4085,7035,7209,7423,8620,8781,	YES
chr10	1856336	1921518	TCONS_00006255	1000	+	0	0	0	17	204,57,153,85,175,109,114,84,87,99,379,96,140,78,117,215,7274,	0,2139,21942,38879,41294,43645,44300,45705,49553,51467,52509,53941,55297,55525,56027,56228,57908,	YES
chr10	1878296	1920569	TCONS_00006256	1000	+	0	0	0	16	135,85,175,109,114,100,11,87,99,379,96,140,78,117,215,6328,	0,16919,19334,21685,22340,23745,24445,27593,29507,30549,31981,33337,33565,34067,34268,35945,	YES
chr10	1878296	1921518	TCONS_00006257	1000	+	0	0	0	16	135,85,175,109,114,100,11,87,99,379,96,140,78,117,215,7277,	0,16919,19334,21685,22340,23745,24445,27593,29507,30549,31981,33337,33565,34067,34268,35945,	YES
chr10	1878296	1921518	TCONS_00006258	1000	+	0	0	0	15	135,85,175,109,114,84,87,99,379,96,140,78,117,215,7274,	0,16919,19334,21685,22340,23745,27593,29507,30549,31981,33337,33565,34067,34268,35948,	YES
chr10	189053	201891	TCONS_00006184	1000	+	0	0	0	28	106,81,107,127,120,102,93,65,134,315,273,47,57,86,156,412,66,150,499,97,104,85,102,131,130,138,93,526,	0,322,537,719,1038,1865,2051,2395,2542,4239,4815,5160,5885,6390,6559,6978,7543,7859,8099,8750,9111,9306,10953,11289,11509,11790,12071,12312,	YES
chr10	18907581	18936892	TCONS_00006749	1000	+	0	0	0	11	274,126,78,98,166,113,178,165,170,92,739,	0,1460,5945,10372,11721,14833,18819,19116,20682,23162,28572,	YES
chr10	18909075	18936891	TCONS_00006750	1000	+	0	0	0	10	92,78,98,166,113,178,165,170,92,738,	0,4451,8878,10227,13339,17325,17622,19188,21668,27078,	YES
chr10	18922266	18926824	TCONS_00006751	1000	+	0	0	0	3	261,178,127,	0,4134,4431,	YES
chr10	18941218	18966165	TCONS_00006752	1000	+	0	0	0	4	255,37,59,1998,	0,13332,19456,22949,	YES
chr10	18941371	18966165	TCONS_00006753	1000	+	0	0	0	6	102,220,73,98,150,1998,	0,13179,16702,16892,19212,22796,	YES
chr10	18941394	18964761	TCONS_00006754	1000	+	0	0	0	4	79,37,59,594,	0,13156,19280,22773,	YES
chr10	189603	201891	TCONS_00006185	1000	+	0	0	0	27	94,127,120,102,93,65,134,315,273,47,57,86,156,412,66,150,140,69,97,104,85,102,131,130,138,93,526,	0,169,488,1315,1501,1845,1992,3689,4265,4610,5335,5840,6009,6428,6993,7309,7549,7979,8200,8561,8756,10403,10739,10959,11240,11521,11762,	YES
chr10	18977783	19022479	TCONS_00006755	1000	+	0	0	0	15	270,89,185,165,62,81,36,33,121,157,142,171,180,166,92,	0,20943,22998,25493,25819,28671,28957,29523,29661,33692,35542,35901,41409,42139,44604,	YES
chr10	18977783	19025842	TCONS_00006756	1000	+	0	0	0	15	270,89,185,165,62,81,36,33,121,157,142,171,180,166,3455,	0,20943,22998,25493,25819,28671,28957,29523,29661,33692,35542,35901,41409,42139,44604,	YES
chr10	18982425	19025842	TCONS_00006757	1000	+	0	0	0	14	260,89,185,165,62,81,69,121,157,142,171,180,166,3455,	0,16301,18356,20851,21177,24029,24845,25019,29050,30900,31259,36767,37497,39962,	YES
chr10	18982488	19023153	TCONS_00006758	1000	+	0	0	0	14	197,89,185,165,62,81,69,121,157,142,171,180,166,766,	0,16238,18293,20788,21114,23966,24782,24956,28987,30837,31196,36704,37434,39899,	YES
chr10	18982488	19025842	TCONS_00006759	1000	+	0	0	0	15	197,89,185,165,62,81,36,33,121,157,142,171,180,166,3455,	0,16238,18293,20788,21114,23966,24252,24818,24956,28987,30837,31196,36704,37434,39899,	YES
chr10	18982490	19022691	TCONS_00006760	1000	+	0	0	0	14	195,89,185,165,62,81,69,121,157,142,171,180,166,304,	0,16236,18291,20786,21112,23964,24780,24954,28985,30835,31194,36702,37432,39897,	YES
chr10	19057065	19122836	TCONS_00006762	1000	+	0	0	0	22	226,85,192,150,152,118,142,146,143,141,117,151,112,188,218,85,168,37,2214,170,167,3175,	0,12661,15297,30607,33396,34155,37315,37539,44268,44645,48477,50693,52940,54808,55357,55708,55969,56292,56434,58934,62290,62596,	YES
chr10	19057207	19113202	TCONS_00006763	1000	+	0	0	0	17	84,85,192,150,152,118,142,146,143,141,117,151,112,161,266,85,168,	0,12519,15155,30465,33254,34013,37173,37397,44126,44503,48335,50551,52798,54666,55167,55566,55827,	YES
chr10	19057207	19122836	TCONS_00006764	1000	+	0	0	0	22	84,85,192,150,152,118,142,146,143,141,117,151,112,161,266,85,168,37,2214,170,167,3175,	0,12519,15155,30465,33254,34013,37173,37397,44126,44503,48335,50551,52798,54666,55167,55566,55827,56150,56292,58792,62148,62454,	YES
chr10	19069753	19122836	TCONS_00006765	1000	+	0	0	0	21	58,192,150,152,118,142,146,143,141,117,151,112,188,218,85,168,37,2214,170,167,3175,	0,2609,17919,20708,21467,24627,24851,31580,31957,35789,38005,40252,42120,42669,43020,43281,43604,43746,46246,49602,49908,	YES
chr10	19079941	19122836	TCONS_00006766	1000	+	0	0	0	19	27,150,152,118,142,146,143,141,117,151,112,161,266,85,168,37,2214,170,3481,	0,7731,10520,11279,14439,14663,21392,21769,25601,27817,30064,31932,32433,32832,33093,33416,33558,36058,39414,	YES
chr10	19584772	19596695	TCONS_00006773	1000	+	0	0	0	14	263,56,99,94,78,140,102,98,124,151,83,105,130,913,	0,2222,3916,4098,4268,4663,5439,6626,7218,7424,8364,8555,9807,11010,	YES
chr10	19584772	19622556	TCONS_00006774	1000	+	0	0	0	14	263,56,99,94,78,140,102,98,124,151,83,105,130,11,	0,2222,3916,4098,4268,4663,5439,6626,7218,7424,8364,8555,9807,37773,	YES
chr10	19597722	19600570	TCONS_00006776	1000	+	0	0	0	3	58,56,2108,	0,154,740,	YES
chr10	19598884	19600180	TCONS_00006777	1000	+	0	0	0	1	1296,	0,	YES
chr10	19603081	19606026	TCONS_00006778	1000	+	0	0	0	3	172,1545,509,	0,696,2436,	YES
chr10	19603081	19606026	TCONS_00006779	1000	+	0	0	0	4	172,767,424,509,	0,696,1817,2436,	YES
chr10	19603081	19619538	TCONS_00006780	1000	+	0	0	0	3	172,1298,193,	0,696,16264,	YES
chr10	19604199	19606026	TCONS_00006781	1000	+	0	0	0	3	345,424,509,	0,699,1318,	YES
chr10	19624232	19628262	TCONS_00006782	1000	+	0	0	0	3	78,56,3369,	0,174,661,	YES
chr10	19625600	19627994	TCONS_00006783	1000	+	0	0	0	2	693,624,	0,1770,	YES
chr10	197439	198268	TCONS_00006186	1000	+	0	0	0	3	212,97,104,	0,364,725,	YES
chr10	1983897	1990083	TCONS_00007666	1000	-	0	0	0	7	964,21,110,115,156,50,104,	0,3516,3867,4063,5678,5920,6082,	YES
chr10	1983897	1990092	TCONS_00007667	1000	-	0	0	0	6	964,110,115,156,50,113,	0,3867,4063,5678,5920,6082,	YES
chr10	1984307	1990349	TCONS_00007668	1000	-	0	0	0	7	554,21,110,115,156,50,370,	0,2747,3457,3653,5268,5510,5672,	YES
chr10	20104112	20135114	TCONS_00006784	1000	+	0	0	0	28	35,147,94,167,75,105,166,74,120,147,173,194,106,136,74,90,55,109,107,89,108,83,215,139,161,99,128,1790,	0,4732,5038,5210,6361,6580,6789,10240,10438,11739,12856,13600,13870,14975,17048,17205,17420,17790,18442,18675,19353,19554,21081,21395,23070,23708,27422,29212,	YES
chr10	20104114	20135113	TCONS_00006785	1000	+	0	0	0	28	33,147,94,167,66,105,166,74,120,147,173,194,106,136,74,81,64,109,107,89,108,83,215,139,161,99,128,1789,	0,4730,5036,5208,6359,6578,6787,10238,10436,11737,12854,13598,13868,14973,17046,17203,17409,17788,18440,18673,19351,19552,21079,21393,23068,23706,27420,29210,	YES
chr10	20136999	20139945	TCONS_00008144	1000	-	0	0	0	6	879,112,141,60,66,60,	0,1235,2032,2262,2421,2886,	YES
chr10	20137547	20139945	TCONS_00008145	1000	-	0	0	0	5	331,112,290,66,60,	0,687,1484,1873,2338,	YES
chr10	202082	206924	TCONS_00007607	1000	-	0	0	0	8	452,153,151,75,81,150,144,91,	0,1869,3150,3407,3569,3869,4205,4751,	YES
chr10	202082	207146	TCONS_00007608	1000	-	0	0	0	7	2022,151,75,81,150,144,313,	0,3150,3407,3569,3869,4205,4751,	YES
chr10	20213952	20270777	TCONS_00006794	1000	+	0	0	0	14	499,198,125,112,146,140,78,95,126,78,70,98,27,3045,	0,16011,17246,30497,35022,38290,38660,38829,41245,41534,44853,46876,49796,53780,	YES
chr10	20213952	20270777	TCONS_00006795	1000	+	0	0	0	13	499,198,125,112,146,140,78,95,126,78,85,98,3045,	0,16011,17246,30497,35022,38290,38660,38829,41245,41534,44838,46876,53780,	YES
chr10	20214095	20268316	TCONS_00006796	1000	+	0	0	0	14	356,198,125,112,146,140,78,95,126,78,70,98,27,584,	0,15868,17103,30354,34879,38147,38517,38686,41102,41391,44710,46733,49653,53637,	YES
chr10	20214095	20270777	TCONS_00006797	1000	+	0	0	0	14	356,198,125,112,146,140,78,95,126,78,85,98,27,3045,	0,15868,17103,30354,34879,38147,38517,38686,41102,41391,44695,46733,49653,53637,	YES
chr10	20237	29806	TCONS_00006161	1000	+	0	0	0	16	234,88,129,112,145,132,66,69,14,36,70,135,215,88,103,352,	0,2669,2828,3151,4806,5283,5676,5834,6067,6720,6810,7033,7521,7867,8820,9217,	YES
chr10	20255298	20267978	TCONS_00006798	1000	+	0	0	0	5	25,78,70,98,246,	0,188,3507,5530,12434,	YES
chr10	20398087	20406075	TCONS_00006801	1000	+	0	0	0	6	642,123,153,102,57,883,	0,1045,4424,4654,5886,7105,	YES
chr10	20398087	20406075	TCONS_00006802	1000	+	0	0	0	6	281,123,153,102,57,883,	0,1045,4424,4654,5886,7105,	YES
chr10	20398338	20405598	TCONS_00006803	1000	+	0	0	0	6	147,123,153,102,57,406,	0,794,4173,4403,5635,6854,	YES
chr10	20398361	20404022	TCONS_00006804	1000	+	0	0	0	5	368,123,153,102,49,	0,771,4150,4380,5612,	YES
chr10	20398392	20405545	TCONS_00006805	1000	+	0	0	0	6	51,123,153,102,57,353,	0,740,4119,4349,5581,6800,	YES
chr10	20398552	20405552	TCONS_00006806	1000	+	0	0	0	6	115,123,153,102,57,360,	0,580,3959,4189,5421,6640,	YES
chr10	20403661	20405631	TCONS_00006807	1000	+	0	0	0	2	369,439,	0,1531,	YES
chr10	20426571	20435340	TCONS_00006808	1000	+	0	0	0	11	305,155,138,460,43,140,72,173,71,96,83,	0,471,2689,2901,3487,4555,5539,6259,6508,6663,8686,	YES
chr10	20426571	20435805	TCONS_00006809	1000	+	0	0	0	9	305,155,138,460,173,71,96,59,388,	0,471,2689,2901,6259,6508,6663,8686,8846,	YES
chr10	20426571	20482737	TCONS_00006810	1000	+	0	0	0	8	305,155,138,460,173,71,96,276,	0,471,2689,2901,6259,6508,6663,55890,	YES
chr10	20426571	20483383	TCONS_00006811	1000	+	0	0	0	9	305,155,138,460,173,71,96,59,762,	0,471,2689,2901,6259,6508,6663,55890,56050,	YES
chr10	20427072	20435340	TCONS_00006812	1000	+	0	0	0	10	125,138,460,43,140,72,173,71,96,83,	0,2188,2400,2986,4054,5038,5758,6007,6162,8185,	YES
chr10	20441708	20480325	TCONS_00008152	1000	-	0	0	0	12	68,112,137,116,241,166,168,152,184,217,209,177,	0,1507,2470,2685,5683,6570,11639,11907,16153,18529,26356,38440,	NO
chr10	20489092	20526754	TCONS_00008153	1000	-	0	0	0	13	68,112,137,116,241,166,168,152,184,217,209,176,268,	0,1503,2453,2668,5642,6511,11756,12032,16138,18521,21052,35933,37394,	YES
chr10	20540727	20553794	TCONS_00008154	1000	-	0	0	0	11	1097,121,107,170,44,77,95,51,157,61,33,	0,1638,3278,3464,3716,4356,4602,5901,9296,10346,13034,	YES
chr10	20540727	20558635	TCONS_00008155	1000	-	0	0	0	12	1097,121,107,170,44,77,95,51,157,61,1012,96,	0,1638,3278,3464,3716,4356,4602,5901,9296,10346,13073,17812,	YES
chr10	20540727	20563242	TCONS_00008156	1000	-	0	0	0	13	1097,121,107,161,44,77,95,51,157,61,1012,104,447,	0,1638,3278,3464,3716,4356,4602,5901,9296,10346,13073,17812,22068,	YES
chr10	20584607	20603536	TCONS_00008160	1000	-	0	0	0	17	27,55,145,144,106,156,138,87,129,65,209,142,90,115,90,197,139,	0,504,1820,2036,2264,2932,4805,5130,5300,12050,12215,14171,14437,15896,16098,18496,18790,	YES
chr10	20584607	20605637	TCONS_00008161	1000	-	0	0	0	18	27,55,145,144,106,156,138,87,129,65,209,142,90,115,90,194,163,67,	0,504,1820,2036,2264,2932,4805,5130,5300,12050,12215,14171,14437,15896,16098,18496,18790,20963,	YES
chr10	20584607	20605637	TCONS_00008162	1000	-	0	0	0	18	27,55,145,144,106,156,138,87,129,65,209,142,90,115,90,197,163,67,	0,504,1820,2036,2264,2932,4805,5130,5300,12050,12215,14171,14437,15896,16098,18496,18790,20963,	YES
chr10	20608631	20618205	TCONS_00008163	1000	-	0	0	0	8	523,171,125,64,91,109,113,210,	0,1917,3667,4050,5328,5547,7468,9364,	YES
chr10	20608631	20619751	TCONS_00008164	1000	-	0	0	0	8	523,171,125,64,91,109,113,24,	0,1917,3667,4050,5328,5547,7468,11096,	YES
chr10	20608632	20618229	TCONS_00008165	1000	-	0	0	0	8	522,171,125,64,91,109,113,234,	0,1916,3666,4049,5327,5546,7467,9363,	YES
chr10	20609065	20618267	TCONS_00008166	1000	-	0	0	0	8	89,171,125,64,91,109,113,207,	0,1483,3233,3616,4894,5113,7034,8995,	YES
chr10	20620013	20668519	TCONS_00008167	1000	-	0	0	0	22	4748,205,107,142,117,270,113,203,157,24,180,198,127,126,131,46,92,109,621,155,160,1005,	0,7552,19026,19214,19443,21227,23995,24222,26374,30120,36279,38021,38386,39063,39318,39562,41586,41786,44468,45167,47250,47501,	YES
chr10	20620013	20669992	TCONS_00008168	1000	-	0	0	0	23	4748,205,107,142,117,270,113,203,157,24,180,198,127,126,131,46,92,109,621,155,160,1052,266,	0,7552,19026,19214,19443,21227,23995,24222,26374,30120,36279,38021,38386,39063,39318,39562,41586,41786,44468,45167,47250,47501,49713,	YES
chr10	20620013	20670010	TCONS_00008169	1000	-	0	0	0	22	4748,205,107,142,117,270,113,203,157,180,198,127,126,131,46,92,109,621,155,160,1049,284,	0,7552,19026,19214,19443,21227,23995,24222,26374,36279,38021,38386,39063,39318,39562,41586,41786,44468,45167,47250,47501,49713,	YES
chr10	20620013	20670044	TCONS_00008170	1000	-	0	0	0	21	4748,205,107,142,117,270,113,203,157,180,198,127,35,46,92,109,621,155,160,1052,318,	0,7552,19026,19214,19443,21227,23995,24222,26374,36279,38021,38386,39063,39562,41586,41786,44468,45167,47250,47501,49713,	YES
chr10	20620013	20670044	TCONS_00008171	1000	-	0	0	0	23	4748,205,107,142,117,270,113,203,157,24,180,198,127,126,131,46,92,109,621,155,160,1049,318,	0,7552,19026,19214,19443,21227,23995,24222,26374,30120,36279,38021,38386,39063,39318,39562,41586,41786,44468,45167,47250,47501,49713,	YES
chr10	20639039	20669992	TCONS_00008172	1000	-	0	0	0	21	107,142,117,270,113,203,157,24,180,198,127,126,131,46,92,109,621,155,160,1052,266,	0,188,417,2201,4969,5196,7348,11094,17253,18995,19360,20037,20292,20536,22560,22760,25442,26141,28224,28475,30687,	YES
chr10	20671394	20687191	TCONS_00006813	1000	+	0	0	0	11	406,70,445,144,138,204,120,120,108,66,1637,	0,1588,2012,5943,6743,7976,9750,10168,11331,11580,14160,	YES
chr10	20671474	20679459	TCONS_00006814	1000	+	0	0	0	6	326,70,445,144,138,89,	0,1508,1932,5863,6663,7896,	YES
chr10	20673005	20686928	TCONS_00006815	1000	+	0	0	0	10	47,445,144,138,204,120,120,108,66,1374,	0,401,4332,5132,6365,8139,8557,9720,9969,12549,	YES
chr10	207328	222485	TCONS_00006187	1000	+	0	0	0	13	465,116,70,200,120,189,148,287,147,141,276,144,2133,	0,1234,1469,2660,2983,3986,4262,9669,10780,11570,11843,12220,13024,	YES
chr10	207420	211738	TCONS_00006188	1000	+	0	0	0	7	373,116,70,200,120,189,148,	0,1142,1377,2568,2891,3894,4170,	YES
chr10	207596	210338	TCONS_00006189	1000	+	0	0	0	3	197,200,27,	0,2392,2715,	YES
chr10	209363	211738	TCONS_00006190	1000	+	0	0	0	5	38,200,120,189,148,	0,625,948,1951,2227,	YES
chr10	209363	221073	TCONS_00006191	1000	+	0	0	0	11	38,200,120,189,148,287,147,141,276,144,721,	0,625,948,1951,2227,7634,8745,9535,9808,10185,10989,	YES
chr10	209363	222485	TCONS_00006192	1000	+	0	0	0	11	38,200,120,189,148,287,147,141,276,144,2133,	0,625,948,1951,2227,7634,8745,9535,9808,10185,10989,	YES
chr10	209363	222485	TCONS_00006193	1000	+	0	0	0	11	247,200,120,189,148,287,147,141,276,144,2133,	0,625,948,1951,2227,7634,8745,9535,9808,10185,10989,	YES
chr10	209397	211355	TCONS_00006194	1000	+	0	0	0	4	213,200,120,41,	0,591,914,1917,	YES
chr10	20998370	21128021	TCONS_00008183	1000	-	0	0	0	4	3572,220,2187,792,	0,54488,126097,128859,	YES
chr10	20998370	21135264	TCONS_00008184	1000	-	0	0	0	5	3572,220,2187,792,628,	0,54488,126097,128859,136266,	YES
chr10	20998370	21135264	TCONS_00008185	1000	-	0	0	0	5	3572,220,2187,819,628,	0,54488,126097,128859,136266,	YES
chr10	21001568	21135264	TCONS_00008186	1000	-	0	0	0	5	374,220,2187,792,628,	0,51290,122899,125661,133068,	YES
chr10	21440455	21443248	TCONS_00008188	1000	-	0	0	0	4	43,121,211,132,	0,138,2363,2661,	YES
chr10	21515921	21525089	TCONS_00006830	1000	+	0	0	0	4	166,109,131,1280,	0,504,2039,7888,	YES
chr10	21515921	21525089	TCONS_00006831	1000	+	0	0	0	11	166,109,536,139,191,130,171,65,148,290,533,	0,504,2039,5445,5675,5950,6263,6533,7369,7598,8635,	YES
chr10	21515921	21525089	TCONS_00006832	1000	+	0	0	0	11	166,109,176,140,139,191,130,171,65,148,1570,	0,504,2039,2435,5445,5675,5950,6263,6533,7369,7598,	YES
chr10	21515994	21524317	TCONS_00006833	1000	+	0	0	0	4	93,109,131,508,	0,431,1966,7815,	YES
chr10	21515995	21518515	TCONS_00006834	1000	+	0	0	0	3	92,109,555,	0,430,1965,	YES
chr10	21515998	21517181	TCONS_00006835	1000	+	0	0	0	2	89,756,	0,427,	YES
chr10	21522182	21524617	TCONS_00006836	1000	+	0	0	0	5	173,65,148,290,61,	0,272,1108,1337,2374,	YES
chr10	21525858	21551798	TCONS_00006837	1000	+	0	0	0	13	78,460,241,187,91,138,119,250,119,111,79,165,879,	0,4146,7244,7658,8080,11713,14313,14605,17281,17886,18721,20743,25061,	YES
chr10	21525858	21551798	TCONS_00006838	1000	+	0	0	0	13	78,60,220,187,91,138,119,250,119,111,79,165,879,	0,4546,7265,7658,8080,11713,14313,14605,17281,17886,18721,20743,25061,	YES
chr10	21525869	21533340	TCONS_00006839	1000	+	0	0	0	3	67,460,238,	0,4135,7233,	YES
chr10	21525869	21551794	TCONS_00006840	1000	+	0	0	0	13	67,60,241,187,91,138,119,250,119,111,79,165,875,	0,4535,7233,7647,8069,11702,14302,14594,17270,17875,18710,20732,25050,	YES
chr10	21552520	21565270	TCONS_00008189	1000	-	0	0	0	5	3414,107,178,40,32,	0,6002,9627,9907,12718,	YES
chr10	21552520	21565670	TCONS_00008190	1000	-	0	0	0	5	3410,107,178,40,432,	0,6002,9627,9907,12718,	YES
chr10	21623129	21625722	TCONS_00008191	1000	-	0	0	0	4	439,882,749,83,	0,616,1672,2510,	YES
chr10	21623129	21625722	TCONS_00008192	1000	-	0	0	0	4	529,795,749,83,	0,703,1672,2510,	YES
chr10	21623129	21625722	TCONS_00008193	1000	-	0	0	0	4	439,531,749,83,	0,967,1672,2510,	YES
chr10	21623129	21626322	TCONS_00008194	1000	-	0	0	0	4	1498,749,56,129,	0,1672,2921,3064,	YES
chr10	21623129	21626322	TCONS_00008195	1000	-	0	0	0	5	616,531,749,56,129,	0,967,1672,2921,3064,	YES
chr10	21623134	21623907	TCONS_00008196	1000	-	0	0	0	2	524,75,	0,698,	YES
chr10	21623134	21623933	TCONS_00008197	1000	-	0	0	0	2	434,188,	0,611,	YES
chr10	21623187	21625302	TCONS_00008198	1000	-	0	0	0	3	558,531,501,	0,909,1614,	YES
chr10	21625105	21625722	TCONS_00008199	1000	-	0	0	0	2	445,83,	0,534,	YES
chr10	21695878	21727403	TCONS_00006847	1000	+	0	0	0	9	61,2181,212,15,48,24,59,89,221,	0,290,2516,3115,4945,6945,7602,17824,31304,	YES
chr10	21695878	21729976	TCONS_00006848	1000	+	0	0	0	6	61,2181,260,59,89,2794,	0,290,2516,7602,17824,31304,	YES
chr10	21695878	21729976	TCONS_00006849	1000	+	0	0	0	9	61,2181,212,15,48,24,59,89,2794,	0,290,2516,3115,4945,6945,7602,17824,31304,	YES
chr10	21866020	21868600	TCONS_00006872	1000	+	0	0	0	2	2433,12,	0,2568,	YES
chr10	21869751	22030708	TCONS_00006873	1000	+	0	0	0	4	2483,59,119,264,	0,154890,158676,160693,	YES
chr10	21869751	22032148	TCONS_00006874	1000	+	0	0	0	4	2483,59,119,1704,	0,154890,158676,160693,	YES
chr10	21872487	22032148	TCONS_00006875	1000	+	0	0	0	4	2498,59,119,1704,	0,152154,155940,157957,	YES
chr10	21896277	21901743	TCONS_00006876	1000	+	0	0	0	4	2457,60,40,77,	0,4256,5251,5389,	YES
chr10	21930558	21933671	TCONS_00006877	1000	+	0	0	0	2	2406,9,	0,3104,	YES
chr10	21965886	21969034	TCONS_00006878	1000	+	0	0	0	2	2337,9,	0,3139,	YES
chr10	22002068	22030674	TCONS_00006879	1000	+	0	0	0	4	2439,59,119,233,	0,22573,26359,28373,	YES
chr10	22002068	22032148	TCONS_00006880	1000	+	0	0	0	4	2439,59,119,1707,	0,22573,26359,28373,	YES
chr10	22005760	22008462	TCONS_00006881	1000	+	0	0	0	2	2439,51,	0,2651,	YES
chr10	22005760	22024704	TCONS_00006882	1000	+	0	0	0	6	2439,16,13,11,8,69,	0,2579,3069,3853,8607,18875,	YES
chr10	22005760	22032148	TCONS_00006883	1000	+	0	0	0	8	2439,16,13,11,8,65,119,1704,	0,2579,3069,3853,8607,18875,22667,24684,	YES
chr10	22005760	22032148	TCONS_00006884	1000	+	0	0	0	4	2439,59,119,1704,	0,18881,22667,24684,	YES
chr10	22005760	22032148	TCONS_00006885	1000	+	0	0	0	9	2439,19,13,19,20,12,59,119,1704,	0,3430,4434,4471,4617,6375,18881,22667,24684,	YES
chr10	22013120	22015721	TCONS_00006886	1000	+	0	0	0	2	2455,12,	0,2589,	YES
chr10	22013120	22032148	TCONS_00006887	1000	+	0	0	0	4	2455,59,119,1704,	0,11521,15307,17324,	YES
chr10	22016902	22032148	TCONS_00006888	1000	+	0	0	0	4	2448,59,119,1704,	0,7739,11525,13542,	YES
chr10	22019638	22032148	TCONS_00006889	1000	+	0	0	0	4	2466,59,119,1704,	0,5003,8789,10806,	YES
chr10	2201989	2420674	TCONS_00006262	1000	+	0	0	0	24	72,111,194,148,204,176,138,262,144,166,107,120,198,157,128,171,219,240,225,134,88,219,72,673,	0,58696,79403,86261,95566,108320,110987,113255,116745,118621,146324,150795,153021,160144,163614,165343,179384,187194,192163,196758,201045,209287,211817,218012,	YES
chr10	22026636	22034039	TCONS_00008204	1000	-	0	0	0	3	255,155,17,	0,1772,7386,	NO
chr10	22130180	22131815	TCONS_00008206	1000	-	0	0	0	5	388,207,183,63,132,	0,479,1035,1332,1503,	YES
chr10	22135514	22150273	TCONS_00006892	1000	+	0	0	0	2	1785,91,	0,14668,	NO
chr10	22135719	22140619	TCONS_00008208	1000	-	0	0	0	6	2209,234,204,31,119,119,	0,2296,2715,3975,4261,4781,	YES
chr10	22142798	22154261	TCONS_00008209	1000	-	0	0	0	18	281,181,158,603,207,183,63,150,94,210,240,92,2175,228,237,22,119,181,	0,354,626,866,1573,1889,2194,3334,3619,3824,4179,4770,5012,8121,9942,10322,10763,11282,	YES
chr10	2220819	2420674	TCONS_00006263	1000	+	0	0	0	24	85,111,194,148,204,176,138,262,144,166,107,120,198,157,128,171,219,240,225,134,88,219,72,673,	0,39866,60573,67431,76736,89490,92157,94425,97915,99791,127494,131965,134191,141314,144784,146513,160554,168364,173333,177928,182215,190457,192987,199182,	YES
chr10	22234686	22245329	TCONS_00006897	1000	+	0	0	0	11	190,80,120,94,107,38,67,78,99,75,667,	0,1097,1282,1491,1664,1852,6706,6862,7032,7221,9976,	YES
chr10	22234703	22245326	TCONS_00006898	1000	+	0	0	0	11	173,80,120,94,107,38,67,74,103,75,664,	0,1080,1265,1474,1647,1835,6689,6845,7011,7204,9959,	YES
chr10	22234703	22245326	TCONS_00006899	1000	+	0	0	0	12	173,80,120,94,107,38,6,67,78,99,75,664,	0,1080,1265,1474,1647,1835,5366,6689,6845,7015,7204,9959,	YES
chr10	22234703	22245326	TCONS_00006900	1000	+	0	0	0	13	173,80,120,94,107,38,8,4,67,78,99,75,664,	0,1080,1265,1474,1647,1835,2786,5220,6689,6845,7015,7204,9959,	YES
chr10	22234810	22241814	TCONS_00006901	1000	+	0	0	0	8	66,80,120,94,107,38,67,266,	0,973,1158,1367,1540,1728,6582,6738,	YES
chr10	22234810	22244842	TCONS_00006902	1000	+	0	0	0	10	66,31,68,107,38,67,78,99,75,180,	0,973,1393,1540,1728,6582,6738,6908,7097,9852,	YES
chr10	22235343	22245388	TCONS_00006903	1000	+	0	0	0	11	34,80,120,94,107,38,67,78,99,75,726,	0,440,625,834,1007,1195,6049,6205,6375,6564,9319,	YES
chr10	22235370	22236457	TCONS_00006904	1000	+	0	0	0	5	118,80,120,94,107,	0,413,598,807,980,	YES
chr10	22241739	22244968	TCONS_00006905	1000	+	0	0	0	2	243,306,	0,2923,	YES
chr10	22344977	22350629	TCONS_00008222	1000	-	0	0	0	4	1324,85,165,493,	0,2709,3057,5159,	YES
chr10	224963	230364	TCONS_00006195	1000	+	0	0	0	8	255,12,36,105,163,779,183,279,	0,1186,1220,1749,1955,2242,3426,5122,	YES
chr10	224993	230364	TCONS_00006196	1000	+	0	0	0	8	230,16,100,29,163,779,183,279,	0,517,762,993,1925,2212,3396,5092,	YES
chr10	22707987	22733396	TCONS_00006907	1000	+	0	0	0	26	299,501,64,130,96,115,103,197,218,106,162,128,232,167,98,101,74,135,204,182,155,164,45,25,2483,714,	0,2502,3094,5951,6244,7859,8101,8791,9067,10172,10404,11590,11801,12119,14300,15051,15246,17773,17997,19938,20209,21234,21487,21665,22129,24695,	YES
chr10	22707987	22733396	TCONS_00006908	1000	+	0	0	0	26	299,501,64,130,96,115,103,197,218,106,162,128,232,167,98,104,74,135,204,182,155,176,45,112,2483,714,	0,2502,3094,5951,6244,7859,8101,8791,9067,10172,10404,11590,11801,12119,14300,15048,15246,17773,17997,19938,20209,21234,21487,21665,22129,24695,	YES
chr10	22710752	22733396	TCONS_00006909	1000	+	0	0	0	25	238,64,130,96,115,103,197,218,106,162,128,232,167,98,101,74,135,204,182,155,176,45,112,2483,714,	0,329,3186,3479,5094,5336,6026,6302,7407,7639,8825,9036,9354,11535,12286,12481,15008,15232,17173,17444,18469,18722,18900,19364,21930,	YES
chr10	22711110	22733393	TCONS_00006910	1000	+	0	0	0	24	35,130,96,115,103,197,218,106,162,128,232,167,98,104,74,135,204,182,155,176,45,112,2483,711,	0,2828,3121,4736,4978,5668,5944,7049,7281,8467,8678,8996,11177,11925,12123,14650,14874,16815,17086,18111,18364,18542,19006,21572,	YES
chr10	22727924	22733396	TCONS_00006911	1000	+	0	0	0	7	183,155,176,45,112,2483,714,	0,272,1297,1550,1728,2192,4758,	YES
chr10	22736902	22808198	TCONS_00006912	1000	+	0	0	0	5	149,296,93,63,3710,	0,25388,63294,65046,67586,	YES
chr10	22825271	22963924	TCONS_00006914	1000	+	0	0	0	21	31,83,124,75,196,213,135,354,2537,127,106,206,107,69,149,115,188,142,127,171,3669,	0,118271,118457,119284,120151,120453,120868,122110,122705,125956,126229,128347,128750,128983,129167,129742,129973,132911,133142,133366,134984,	YES
chr10	22924268	22960869	TCONS_00006915	1000	+	0	0	0	21	151,83,124,75,196,213,135,354,2537,127,106,206,107,69,149,115,188,142,127,171,614,	0,19274,19460,20287,21154,21456,21871,23113,23708,26959,27232,29350,29753,29986,30170,30745,30976,33914,34145,34369,35987,	YES
chr10	22924268	22963924	TCONS_00006916	1000	+	0	0	0	20	151,83,124,196,213,135,354,2537,127,106,206,107,69,149,115,188,142,127,171,3669,	0,19274,19460,21154,21456,21871,23113,23708,26959,27232,29350,29753,29986,30170,30745,30976,33914,34145,34369,35987,	YES
chr10	22924268	22963924	TCONS_00006917	1000	+	0	0	0	21	151,83,124,75,196,213,135,354,2537,127,106,206,107,69,149,115,188,142,127,171,3669,	0,19274,19460,20287,21154,21456,21871,23113,23708,26959,27232,29350,29753,29986,30170,30745,30976,33914,34145,34369,35987,	YES
chr10	22929375	22963924	TCONS_00006918	1000	+	0	0	0	21	184,83,124,75,196,213,135,354,2537,127,106,206,107,69,149,115,188,142,127,171,3669,	0,14167,14353,15180,16047,16349,16764,18006,18601,21852,22125,24243,24646,24879,25063,25638,25869,28807,29038,29262,30880,	YES
chr10	22943733	22963924	TCONS_00006919	1000	+	0	0	0	19	119,75,196,213,135,354,2537,127,106,206,107,69,149,115,188,142,127,171,3669,	0,822,1689,1991,2406,3648,4243,7494,7767,9885,10288,10521,10705,11280,11511,14449,14680,14904,16522,	YES
chr10	22948	29534	TCONS_00006162	1000	+	0	0	0	15	46,129,112,145,132,66,69,14,36,70,135,215,88,103,80,	0,117,440,2095,2572,2965,3123,3356,4009,4099,4322,4810,5156,6109,6506,	YES
chr10	22972293	22979870	TCONS_00006920	1000	+	0	0	0	3	227,408,666,	0,3809,6911,	YES
chr10	22972356	22979856	TCONS_00006921	1000	+	0	0	0	3	164,408,652,	0,3746,6848,	YES
chr10	22989528	23003931	TCONS_00008228	1000	-	0	0	0	9	556,171,81,338,137,125,259,109,113,	0,1500,2269,2421,4074,4745,5339,7590,14290,	YES
chr10	22989542	23003950	TCONS_00008229	1000	-	0	0	0	10	542,171,81,99,122,137,125,259,109,132,	0,1486,2255,2407,2623,4060,4731,5325,7576,14276,	YES
chr10	23038573	23045695	TCONS_00008237	1000	-	0	0	0	5	355,52,159,103,228,	0,3031,3256,3513,6894,	YES
chr10	23055012	23062288	TCONS_00006925	1000	+	0	0	0	15	295,86,107,97,111,81,63,67,54,107,92,45,51,118,535,	0,467,647,851,1054,1360,2985,3128,3370,3518,3706,4799,4929,5051,6741,	YES
chr10	23091437	23166004	TCONS_00006927	1000	+	0	0	0	16	162,31,61,45,197,60,68,136,85,73,138,84,24,77,55,65,	0,700,807,954,2828,3803,4005,63124,64534,64743,64961,66431,69782,74189,74359,74502,	YES
chr10	23091439	23107732	TCONS_00006928	1000	+	0	0	0	15	160,31,61,45,197,60,68,136,85,73,138,84,77,55,738,	0,698,805,952,2826,3801,4003,4177,5587,5796,6014,7484,15242,15412,15555,	YES
chr10	23091496	23107234	TCONS_00006929	1000	+	0	0	0	9	80,75,73,138,84,24,77,55,240,	0,5540,5739,5957,7427,10778,15185,15355,15498,	YES
chr10	23091576	23107082	TCONS_00006930	1000	+	0	0	0	16	23,31,61,45,197,60,68,136,85,73,138,84,24,77,55,88,	0,561,668,815,2689,3664,3866,4040,5450,5659,5877,7347,10698,15105,15275,15418,	YES
chr10	23107664	23112569	TCONS_00008239	1000	-	0	0	0	6	571,252,74,88,64,293,	0,2725,3073,4262,4454,4612,	NO
chr10	23112564	23116410	TCONS_00006931	1000	+	0	0	0	4	86,83,131,406,	0,259,3167,3440,	YES
chr10	23112612	23116889	TCONS_00006932	1000	+	0	0	0	4	38,83,131,885,	0,211,3119,3392,	YES
chr10	23116426	23118528	TCONS_00008240	1000	-	0	0	0	3	672,83,188,	0,1483,1914,	NO
chr10	23116427	23177361	TCONS_00008241	1000	-	0	0	0	3	671,83,78,	0,1482,60856,	NO
chr10	23118651	23119918	TCONS_00006933	1000	+	0	0	0	3	264,97,102,	0,343,1165,	YES
chr10	23118651	23126864	TCONS_00006934	1000	+	0	0	0	6	264,97,102,230,102,1677,	0,343,1165,3547,3858,6536,	YES
chr10	23118697	23185296	TCONS_00006935	1000	+	0	0	0	7	161,62,95,102,230,102,1168,	0,59099,59242,60062,62442,62753,65431,	YES
chr10	23118894	23126864	TCONS_00006936	1000	+	0	0	0	6	21,95,102,230,102,1677,	0,102,922,3304,3615,6293,	YES
chr10	23140619	23141741	TCONS_00008242	1000	-	0	0	0	3	250,202,523,	0,337,599,	NO
chr10	23171557	23175834	TCONS_00006937	1000	+	0	0	0	4	38,83,131,885,	0,211,3119,3392,	NO
chr10	23175372	23177471	TCONS_00008243	1000	-	0	0	0	3	671,83,188,	0,1480,1911,	NO
chr10	23319645	23328578	TCONS_00006942	1000	+	0	0	0	9	363,108,100,139,85,105,116,74,819,	0,892,4192,4585,4845,5355,5536,5734,8114,	YES
chr10	23319645	23329953	TCONS_00006943	1000	+	0	0	0	9	363,108,100,139,85,105,116,74,2194,	0,892,4192,4585,4845,5355,5536,5734,8114,	YES
chr10	23319645	23329953	TCONS_00006944	1000	+	0	0	0	9	363,108,100,139,85,48,56,74,2194,	0,892,4192,4585,4845,5355,5596,5734,8114,	YES
chr10	23329995	23359064	TCONS_00008247	1000	-	0	0	0	12	979,71,160,203,47,136,193,98,77,80,218,325,	0,1084,3355,5455,5734,6926,7146,7990,8198,8843,9011,28744,	YES
chr10	23330528	23359106	TCONS_00008248	1000	-	0	0	0	13	446,71,160,203,47,136,193,98,77,80,218,194,57,	0,551,2822,4922,5201,6393,6613,7457,7665,8310,8478,28211,28521,	YES
chr10	23359144	23398115	TCONS_00006945	1000	+	0	0	0	30	99,207,99,231,53,181,174,191,148,735,42,190,240,154,148,208,160,105,137,136,145,214,238,81,187,157,221,195,168,654,	0,719,2631,3316,3641,5573,6551,7656,8257,9291,12533,12663,13157,14504,14782,16096,16869,17153,18616,18836,22862,25025,26643,29457,31510,31975,35611,35902,37725,38317,	YES
chr10	23359144	23399803	TCONS_00006946	1000	+	0	0	0	30	99,207,99,231,53,181,174,191,148,735,42,190,240,154,148,208,160,105,137,136,145,214,238,81,187,157,221,195,168,2342,	0,719,2631,3316,3641,5573,6551,7656,8257,9291,12533,12663,13157,14504,14782,16096,16869,17153,18616,18836,22862,25025,26643,29457,31510,31975,35611,35902,37725,38317,	YES
chr10	23359201	23399550	TCONS_00006947	1000	+	0	0	0	30	42,207,99,231,53,181,174,191,148,735,42,190,240,154,148,208,160,105,143,136,145,214,238,81,187,157,221,195,168,2089,	0,662,2574,3259,3584,5516,6494,7599,8200,9234,12476,12606,13100,14447,14725,16039,16812,17096,18559,18779,22805,24968,26586,29400,31453,31918,35554,35845,37668,38260,	YES
chr10	24735423	24748344	TCONS_00008254	1000	-	0	0	0	11	375,105,84,138,208,27,110,112,109,105,95,	0,459,771,976,1272,5325,5495,7958,10724,12520,12826,	YES
chr10	24735729	24748344	TCONS_00008255	1000	-	0	0	0	12	69,105,84,138,208,110,112,176,117,109,105,95,	0,153,465,670,966,5189,7652,7854,8484,10418,12214,12520,	YES
chr10	24735729	24750722	TCONS_00008256	1000	-	0	0	0	13	69,105,84,138,208,110,112,176,117,109,105,55,79,	0,153,465,670,966,5189,7652,7854,8484,10418,12214,13931,14914,	YES
chr10	247959	261920	TCONS_00006197	1000	+	0	0	0	10	87,54,118,120,201,51,204,252,119,991,	0,5497,6501,7102,7986,9064,10836,11364,12360,12970,	YES
chr10	24803924	24822912	TCONS_00008260	1000	-	0	0	0	14	1995,124,74,133,133,144,194,134,93,77,56,295,236,116,	0,2094,2298,4317,4670,6594,6855,7833,8059,11932,12113,12403,18066,18872,	YES
chr10	24803924	24822912	TCONS_00008261	1000	-	0	0	0	14	1995,124,74,133,133,144,194,134,93,77,56,288,243,116,	0,2094,2298,4317,4670,6594,6855,7833,8059,11932,12113,12403,18059,18872,	YES
chr10	24804083	24822150	TCONS_00008262	1000	-	0	0	0	13	1836,124,74,133,133,144,194,134,93,77,56,295,160,	0,1935,2139,4158,4511,6435,6696,7674,7900,11773,11954,12244,17907,	YES
chr10	24805697	24822912	TCONS_00008263	1000	-	0	0	0	14	222,124,74,133,133,144,194,134,93,77,56,295,236,116,	0,321,525,2544,2897,4821,5082,6060,6286,10159,10340,10630,16293,17099,	YES
chr10	24808612	24810972	TCONS_00008264	1000	-	0	0	0	4	115,18,144,193,	0,335,1906,2167,	YES
chr10	24853212	24867088	TCONS_00006966	1000	+	0	0	0	13	353,120,177,222,101,221,190,124,103,116,200,151,289,	0,1742,2210,3138,3587,3848,4881,6791,7445,9393,9600,13332,13587,	YES
chr10	24853212	24867089	TCONS_00006967	1000	+	0	0	0	13	353,120,177,222,101,221,190,124,103,116,200,151,290,	0,1742,2210,3138,3587,3848,4881,6791,7445,9393,9600,13332,13587,	YES
chr10	24853212	24873742	TCONS_00006968	1000	+	0	0	0	18	353,120,177,222,101,221,190,141,103,116,200,151,122,77,67,147,155,673,	0,1742,2210,3138,3587,3848,4881,6791,7445,9393,9600,13332,13587,15103,15302,15904,17768,19857,	YES
chr10	24853212	24873742	TCONS_00006969	1000	+	0	0	0	18	353,120,177,222,101,221,190,124,103,116,200,151,122,77,67,147,155,673,	0,1742,2210,3138,3587,3848,4881,6791,7445,9393,9600,13332,13587,15103,15302,15904,17768,19857,	YES
chr10	24853212	24924519	TCONS_00006970	1000	+	0	0	0	29	353,129,177,222,101,221,190,141,103,116,200,151,122,77,67,147,116,99,494,159,165,111,223,140,103,206,152,109,241,	0,1742,2210,3138,3587,3848,4881,6791,7445,9393,9600,13332,13587,15103,15302,15904,17768,23672,46781,48803,49121,50716,55434,59200,65976,66186,68229,69750,71066,	YES
chr10	24853212	24924519	TCONS_00006971	1000	+	0	0	0	29	353,120,177,222,101,221,190,124,103,116,200,151,122,77,67,147,116,99,494,159,169,137,223,140,103,206,152,109,241,	0,1742,2210,3138,3587,3848,4881,6791,7445,9393,9600,13332,13587,15103,15302,15904,17768,23672,46781,48803,49121,50690,55434,59200,65976,66186,68229,69750,71066,	YES
chr10	24853212	24924519	TCONS_00006972	1000	+	0	0	0	29	353,120,177,222,101,221,190,124,103,116,200,151,122,77,67,147,116,99,494,159,165,111,223,140,103,206,152,109,241,	0,1742,2210,3138,3587,3848,4881,6791,7445,9393,9600,13332,13587,15103,15302,15904,17768,23672,46781,48803,49121,50716,55434,59200,65976,66186,68229,69750,71066,	YES
chr10	24853291	24873187	TCONS_00006973	1000	+	0	0	0	18	274,129,177,222,101,221,190,124,103,116,200,151,122,77,67,147,155,118,	0,1663,2131,3059,3508,3769,4802,6712,7366,9314,9521,13253,13508,15024,15223,15825,17689,19778,	YES
chr10	24853426	24873554	TCONS_00006974	1000	+	0	0	0	4	139,20,145,485,	0,1528,17564,19643,	YES
chr10	24858124	24866635	TCONS_00006975	1000	+	0	0	0	6	159,141,103,116,200,91,	0,1879,2533,4481,4688,8420,	YES
chr10	24860324	24866922	TCONS_00006976	1000	+	0	0	0	5	436,116,198,153,123,	0,2281,2488,6218,6475,	YES
chr10	24860324	24924519	TCONS_00006977	1000	+	0	0	0	21	436,116,198,153,122,77,67,147,116,99,494,159,169,137,223,140,103,206,152,109,241,	0,2281,2488,6218,6475,7991,8190,8792,10656,16560,39669,41691,42009,43578,48322,52088,58864,59074,61117,62638,63954,	YES
chr10	24995005	25053122	TCONS_00006981	1000	+	0	0	0	14	1992,268,213,159,99,278,67,215,106,74,99,120,98,633,	0,2126,9917,36248,41544,45358,50650,50802,52952,53133,53284,53806,54394,57484,	YES
chr10	24995230	25052835	TCONS_00006982	1000	+	0	0	0	14	1767,268,213,159,99,278,67,215,106,74,99,120,101,346,	0,1901,9692,36023,41319,45133,50425,50577,52727,52908,53059,53581,54166,57259,	YES
chr10	25074274	25094911	TCONS_00006985	1000	+	0	0	0	6	214,69,71,115,90,51,	0,17488,17707,19230,19560,20586,	YES
chr10	25074274	25108610	TCONS_00006986	1000	+	0	0	0	15	214,100,69,71,115,90,87,33,78,135,66,65,85,77,629,	0,17142,17488,17707,19230,19560,20586,20990,21107,22952,25701,28241,29510,33538,33707,	YES
chr10	25074276	25093925	TCONS_00006987	1000	+	0	0	0	6	212,100,69,71,115,91,	0,17140,17486,17705,19228,19558,	YES
chr10	25080880	25090541	TCONS_00008275	1000	-	0	0	0	11	1288,148,1402,79,87,111,94,95,69,66,45,	0,2357,4101,6526,6710,6886,8864,9044,9234,9373,9616,	YES
chr10	25080880	25091001	TCONS_00008276	1000	-	0	0	0	12	1288,148,1402,93,79,87,111,94,95,69,66,505,	0,2357,4101,6258,6526,6710,6886,8864,9044,9234,9373,9616,	YES
chr10	25091149	25108610	TCONS_00006988	1000	+	0	0	0	15	44,100,69,71,115,90,87,33,78,135,66,65,85,77,629,	0,267,613,832,2355,2685,3711,4115,4232,6077,8826,11366,12635,16663,16832,	YES
chr10	25091212	25104125	TCONS_00006989	1000	+	0	0	0	12	304,69,71,115,90,87,33,78,135,66,65,341,	0,550,769,2292,2622,3648,4052,4169,6014,8763,11303,12572,	YES
chr10	25091212	25108610	TCONS_00006990	1000	+	0	0	0	14	304,69,71,115,90,87,33,78,135,66,65,85,77,629,	0,550,769,2292,2622,3648,4052,4169,6014,8763,11303,12572,16600,16769,	YES
chr10	25091337	25095645	TCONS_00006991	1000	+	0	0	0	8	179,69,71,115,90,87,33,264,	0,425,644,2167,2497,3523,3927,4044,	YES
chr10	25121729	25139152	TCONS_00006995	1000	+	0	0	0	20	322,132,75,78,48,162,120,100,64,65,61,82,89,62,81,106,98,96,71,534,	0,404,1517,1838,1998,2175,3838,4040,5010,5215,5400,7199,7382,9587,9745,10122,14539,14723,16734,16889,	YES
chr10	25125769	25129176	TCONS_00006997	1000	+	0	0	0	5	100,64,65,61,248,	0,970,1175,1360,3159,	YES
chr10	25140285	25155584	TCONS_00008278	1000	-	0	0	0	6	2174,146,77,172,776,465,	0,6900,7362,10255,11725,14834,	YES
chr10	25141162	25155584	TCONS_00008279	1000	-	0	0	0	6	1297,146,77,172,776,465,	0,6023,6485,9378,10848,13957,	YES
chr10	25142067	25155332	TCONS_00008280	1000	-	0	0	0	6	392,146,77,172,776,213,	0,5118,5580,8473,9943,13052,	YES
chr10	25156454	25190812	TCONS_00008281	1000	-	0	0	0	13	1676,131,100,122,128,110,86,84,97,96,166,281,123,	0,1763,2382,3501,5164,7468,7697,9132,9374,10763,11539,27866,34235,	YES
chr10	25183879	25190770	TCONS_00008282	1000	-	0	0	0	2	722,81,	0,6810,	YES
chr10	25193411	25197184	TCONS_00008283	1000	-	0	0	0	3	699,96,204,	0,3361,3569,	YES
chr10	2526193	2553189	TCONS_00007669	1000	-	0	0	0	12	4724,155,98,113,72,114,219,115,128,63,99,117,	0,6460,8537,8751,10809,11762,15757,16196,17490,21453,22870,26879,	YES
chr10	252864	261920	TCONS_00006198	1000	+	0	0	0	9	232,54,118,1085,51,204,252,119,991,	0,592,1596,2197,4159,5931,6459,7455,8065,	YES
chr10	252864	261920	TCONS_00006199	1000	+	0	0	0	10	191,54,118,120,201,51,204,252,119,991,	0,592,1596,2197,3081,4159,5931,6459,7455,8065,	YES
chr10	252868	256077	TCONS_00006200	1000	+	0	0	0	5	228,54,118,120,132,	0,588,1592,2193,3077,	YES
chr10	252923	255588	TCONS_00006201	1000	+	0	0	0	4	173,54,118,527,	0,533,1537,2138,	YES
chr10	255647	258987	TCONS_00006202	1000	+	0	0	0	3	499,51,192,	0,1376,3148,	YES
chr10	25830711	25838818	TCONS_00007005	1000	+	0	0	0	11	148,50,57,152,104,59,71,106,120,63,354,	0,582,740,3854,4200,4390,4539,4706,7054,7304,7753,	YES
chr10	2583613	2607514	TCONS_00006267	1000	+	0	0	0	6	121,317,49,254,234,5664,	0,11577,11979,14551,15200,18237,	YES
chr10	25839745	25842829	TCONS_00008297	1000	-	0	0	0	10	137,147,183,234,264,83,269,86,141,199,	0,307,556,1045,1349,1697,1951,2493,2655,2885,	YES
chr10	25947478	25962770	TCONS_00008298	1000	-	0	0	0	15	1112,68,99,77,64,168,70,168,42,47,66,34,93,128,225,	0,3442,4214,5926,6075,6282,6663,8356,8670,8860,10476,10755,12088,12578,15067,	YES
chr10	2595455	2607514	TCONS_00006268	1000	+	0	0	0	5	52,49,254,234,5664,	0,137,2709,3358,6395,	YES
chr10	25963451	25968113	TCONS_00008299	1000	-	0	0	0	6	249,133,120,165,72,115,	0,736,1003,4135,4381,4547,	YES
chr10	25963451	25979373	TCONS_00008300	1000	-	0	0	0	14	249,133,120,165,72,116,88,67,179,77,150,80,91,169,	0,736,1003,4135,4381,4547,6646,6853,7026,8920,10168,10407,12962,15753,	YES
chr10	25963451	25979373	TCONS_00008301	1000	-	0	0	0	16	249,133,120,165,72,116,88,67,179,138,62,181,150,80,91,169,	0,736,1003,4135,4381,4547,6646,6853,7026,8920,9141,9282,10168,10407,12962,15753,	YES
chr10	25963451	25979373	TCONS_00008302	1000	-	0	0	0	15	249,120,165,72,116,88,67,179,138,62,181,150,80,91,169,	0,1003,4135,4381,4547,6646,6853,7026,8920,9141,9282,10168,10407,12962,15753,	YES
chr10	25963452	25964323	TCONS_00008303	1000	-	0	0	0	2	248,136,	0,735,	YES
chr10	25964472	25970229	TCONS_00008304	1000	-	0	0	0	5	102,165,72,116,132,	0,3114,3360,3526,5625,	YES
chr10	25970341	25979365	TCONS_00008305	1000	-	0	0	0	7	30,179,77,150,80,91,161,	0,136,2030,3278,3517,6072,8863,	YES
chr10	26004805	26012341	TCONS_00007014	1000	+	0	0	0	4	38,251,1062,206,	0,1114,3388,7330,	YES
chr10	26037452	26042454	TCONS_00008307	1000	-	0	0	0	2	425,117,	0,4885,	YES
chr10	26037452	26196181	TCONS_00008308	1000	-	0	0	0	16	439,251,226,218,119,224,204,108,108,144,174,54,182,258,168,315,	0,7175,9616,15823,23523,32112,33339,34049,41133,58216,59191,61195,61495,120770,122784,158414,	YES
chr10	26037452	26205077	TCONS_00008309	1000	-	0	0	0	16	425,251,226,218,119,224,204,108,108,144,174,54,182,258,168,87,	0,7175,9616,15823,23523,32112,33339,34049,41133,58216,59191,61195,61495,120770,122784,167538,	YES
chr10	26037452	26205077	TCONS_00008310	1000	-	0	0	0	16	439,251,226,218,119,224,204,108,108,144,174,54,182,258,168,87,	0,7175,9616,15823,23523,32112,33339,34049,41133,58216,59191,61195,61495,120770,122784,167538,	YES
chr10	26037454	26044942	TCONS_00008311	1000	-	0	0	0	2	437,315,	0,7173,	YES
chr10	26037454	26044960	TCONS_00008312	1000	-	0	0	0	2	423,333,	0,7173,	YES
chr10	26037775	26195990	TCONS_00008313	1000	-	0	0	0	16	102,251,226,218,119,224,204,108,108,144,174,54,182,258,168,124,	0,6852,9293,15500,23200,31789,33016,33726,40810,57893,58868,60872,61172,120447,122461,158091,	YES
chr10	2608903	2612287	TCONS_00006269	1000	+	0	0	0	2	470,1192,	0,2192,	YES
chr10	26098649	26205077	TCONS_00008314	1000	-	0	0	0	5	52,182,258,168,87,	0,298,59573,61587,106341,	YES
chr10	26128602	26133904	TCONS_00008315	1000	-	0	0	0	4	472,162,560,177,	0,890,1782,5125,	YES
chr10	26158117	26205059	TCONS_00008316	1000	-	0	0	0	3	363,168,69,	0,2119,46873,	YES
chr10	26207181	26225624	TCONS_00008317	1000	-	0	0	0	13	1941,173,88,97,59,109,119,180,109,126,69,228,88,	0,2231,3913,4329,6922,7360,7564,9189,9849,10099,10378,12343,18355,	YES
chr10	26207181	26260151	TCONS_00008318	1000	-	0	0	0	25	1941,173,88,97,59,109,119,180,109,126,69,228,128,213,87,82,105,174,75,147,186,225,173,475,930,	0,2231,3913,4329,6922,7360,7564,9189,9849,10099,10378,12343,27870,28887,34432,34608,35356,39670,42604,42839,45703,47990,48651,50766,52040,	YES
chr10	26207181	26262985	TCONS_00008319	1000	-	0	0	0	26	1941,173,88,97,59,109,119,180,109,126,69,228,128,213,87,82,105,174,75,147,186,225,173,475,940,184,	0,2231,3913,4329,6922,7360,7564,9189,9849,10099,10378,12343,27870,28887,34432,34608,35356,39670,42604,42839,45703,47990,48651,50766,52040,55620,	YES
chr10	26207181	26291817	TCONS_00008320	1000	-	0	0	0	26	1941,173,88,97,59,109,119,180,109,126,69,228,128,213,87,82,105,174,75,186,225,173,475,940,93,207,	0,2231,3913,4329,6922,7360,7564,9189,9849,10099,10378,12343,27870,28887,34432,34608,35356,39670,42604,45703,47990,48651,50766,52040,55620,84429,	YES
chr10	26207198	26262985	TCONS_00008321	1000	-	0	0	0	25	1924,173,88,97,59,109,119,180,109,126,69,228,128,213,87,82,105,174,75,186,225,173,475,940,184,	0,2214,3896,4312,6905,7343,7547,9172,9832,10082,10361,12326,27853,28870,34415,34591,35339,39653,42587,45686,47973,48634,50749,52023,55603,	YES
chr10	26208986	26210003	TCONS_00008322	1000	-	0	0	0	2	136,591,	0,426,	YES
chr10	26216370	26225624	TCONS_00008323	1000	-	0	0	0	6	180,109,126,69,228,88,	0,660,910,1189,3154,9166,	YES
chr10	2627305	2695830	TCONS_00006271	1000	+	0	0	0	30	394,66,131,103,103,157,103,126,109,117,101,87,66,114,112,44,63,120,86,48,48,92,192,131,200,90,166,324,61,155,	0,915,1072,7838,28316,28556,29980,32132,36798,37431,39847,42945,43701,45162,47406,47863,48137,49359,52635,52803,55692,57894,59507,60835,62207,62498,64775,65610,66500,68370,	YES
chr10	2627305	2695830	TCONS_00006272	1000	+	0	0	0	30	394,66,131,103,103,157,103,126,109,117,101,87,66,114,112,44,63,120,86,48,48,92,192,131,200,90,166,324,58,155,	0,915,1072,7838,28316,28556,29980,32132,36798,37431,39847,42945,43701,45162,47406,47863,48137,49359,52635,52803,55692,57894,59507,60835,62207,62498,64775,65610,66503,68370,	YES
chr10	26328824	26333884	TCONS_00008324	1000	-	0	0	0	4	323,118,706,165,	0,411,2632,4895,	YES
chr10	26328824	26333884	TCONS_00008325	1000	-	0	0	0	5	323,118,70,97,165,	0,411,2632,3241,4895,	YES
chr10	26331588	26333789	TCONS_00008326	1000	-	0	0	0	2	574,70,	0,2131,	YES
chr10	26335140	26351271	TCONS_00008327	1000	-	0	0	0	26	1713,53,15,19,103,81,168,135,157,114,101,185,27,124,58,147,94,143,177,143,33,106,162,45,84,136,	0,1784,2591,2870,2968,3188,3348,3552,4155,5433,5639,7490,7812,7919,8403,8560,8821,8952,10156,10451,10954,11660,11860,12100,12300,15995,	YES
chr10	26335140	26351271	TCONS_00008328	1000	-	0	0	0	22	1713,28,37,80,105,168,141,157,114,101,185,77,147,130,89,177,143,130,162,45,84,136,	0,2867,2925,2978,3164,3348,3546,4155,5433,5639,7490,8403,8560,8821,9006,10156,10451,11636,11860,12100,12300,15995,	YES
chr10	26335140	26351271	TCONS_00008329	1000	-	0	0	0	23	1702,87,81,139,101,157,114,101,185,27,124,58,147,94,143,177,143,33,106,162,45,86,136,	0,2978,3188,3348,3586,4155,5433,5639,7490,7812,7919,8403,8560,8821,8952,10156,10451,10954,11660,11860,12100,12300,15995,	YES
chr10	26335140	26351271	TCONS_00008330	1000	-	0	0	0	20	1702,87,81,139,101,157,114,101,185,77,147,94,89,177,143,130,162,45,84,136,	0,2978,3188,3348,3586,4155,5433,5639,7490,8403,8560,8821,9006,10156,10451,11636,11860,12100,12300,15995,	YES
chr10	26335140	26351271	TCONS_00008331	1000	-	0	0	0	20	1702,87,81,154,101,157,114,101,185,77,147,94,89,177,143,130,162,45,86,136,	0,2978,3188,3348,3586,4155,5433,5639,7490,8403,8560,8821,9006,10156,10451,11636,11860,12100,12300,15995,	YES
chr10	26335140	26351392	TCONS_00008332	1000	-	0	0	0	20	1702,87,81,154,101,157,114,101,185,77,147,94,89,177,143,130,162,45,84,257,	0,2978,3188,3348,3586,4155,5433,5639,7490,8403,8560,8821,9006,10156,10451,11636,11860,12100,12300,15995,	YES
chr10	26336045	26351165	TCONS_00008333	1000	-	0	0	0	26	808,53,15,19,103,81,168,135,157,114,101,185,27,124,58,147,94,143,177,143,33,106,162,45,84,30,	0,879,1686,1965,2063,2283,2443,2647,3250,4528,4734,6585,6907,7014,7498,7655,7916,8047,9251,9546,10049,10755,10955,11195,11395,15090,	YES
chr10	26336114	26351165	TCONS_00008334	1000	-	0	0	0	22	739,28,37,80,105,168,141,157,114,101,185,77,147,130,89,177,143,130,162,45,84,30,	0,1893,1951,2004,2190,2374,2572,3181,4459,4665,6516,7429,7586,7847,8032,9182,9477,10662,10886,11126,11326,15021,	YES
chr10	2655621	2667196	TCONS_00006273	1000	+	0	0	0	7	103,157,103,126,109,117,44,	0,240,1664,3816,8482,9115,11531,	YES
chr10	26582375	26596488	TCONS_00007018	1000	+	0	0	0	6	259,57,58,40,33,1668,	0,349,4157,8273,9501,12445,	YES
chr10	26582671	26595178	TCONS_00007019	1000	+	0	0	0	5	110,58,40,33,358,	0,3861,7977,9205,12149,	YES
chr10	26616759	26746417	TCONS_00007020	1000	+	0	0	0	25	5176,90,147,231,126,252,150,210,198,165,183,131,159,304,132,332,197,5,105,125,135,127,188,147,698,	0,8213,37057,43111,53562,55279,88938,91941,95646,98207,101708,102130,104241,106787,107276,110347,116235,117055,117867,120878,121134,123664,125377,128131,128960,	YES
chr10	26616759	26746559	TCONS_00007021	1000	+	0	0	0	24	5176,90,147,231,126,252,150,210,198,165,183,131,159,304,132,332,193,105,125,135,127,188,147,840,	0,8213,37057,43111,53562,55279,88938,91941,95646,98207,101708,102130,104241,106787,107276,110347,116235,117867,120878,121134,123664,125377,128131,128960,	YES
chr10	26616759	26746559	TCONS_00007022	1000	+	0	0	0	25	5176,90,147,231,126,252,150,210,198,165,183,131,159,304,132,332,193,105,27,125,135,127,188,147,840,	0,8213,37057,43111,53562,55279,88938,91941,95646,98207,101708,102130,104241,106787,107276,110347,116235,117867,118602,120878,121134,123664,125377,128131,128960,	YES
chr10	2675204	2695830	TCONS_00006274	1000	+	0	0	0	15	8,28,120,86,48,48,92,192,131,200,90,166,324,61,155,	0,273,1460,4736,4904,7793,9995,11608,12936,14308,14599,16876,17711,18601,20471,	YES
chr10	26752551	26762609	TCONS_00007023	1000	+	0	0	0	8	249,218,46,96,225,23,116,2266,	0,499,3389,5142,5363,6409,6530,7792,	YES
chr10	26765284	26777027	TCONS_00008341	1000	-	0	0	0	7	1788,141,71,60,169,168,459,	0,2733,4305,4607,8358,10193,11284,	YES
chr10	26765284	26798419	TCONS_00008342	1000	-	0	0	0	13	1788,141,71,60,169,168,104,733,181,152,241,182,159,	0,2733,4305,4607,8358,10193,11284,12796,17286,19297,19929,24861,32976,	YES
chr10	26765285	26798419	TCONS_00008343	1000	-	0	0	0	12	1787,141,71,169,168,104,733,181,152,241,182,159,	0,2732,4304,8357,10192,11283,12795,17285,19296,19928,24860,32975,	YES
chr10	26765293	26790291	TCONS_00008344	1000	-	0	0	0	12	1779,141,71,60,169,168,104,733,181,152,241,146,	0,2724,4296,4598,8349,10184,11275,12787,17277,19288,19920,24852,	YES
chr10	26825236	26837196	TCONS_00008347	1000	-	0	0	0	13	1424,165,118,71,108,71,101,86,100,62,102,153,321,	0,3283,3563,3760,3908,4105,5477,6187,6709,7072,9549,9921,11639,	YES
chr10	26825236	26837196	TCONS_00008348	1000	-	0	0	0	12	1424,165,118,71,108,71,101,86,100,62,525,321,	0,3283,3563,3760,3908,4105,5477,6187,6709,7072,9549,11639,	YES
chr10	26825237	26836968	TCONS_00008349	1000	-	0	0	0	12	1423,165,118,71,108,71,101,86,100,62,525,93,	0,3282,3562,3759,3907,4104,5476,6186,6708,7071,9548,11638,	YES
chr10	26830713	26836953	TCONS_00008350	1000	-	0	0	0	7	101,86,100,62,102,153,78,	0,710,1232,1595,4072,4444,6162,	YES
chr10	26837887	26852784	TCONS_00008351	1000	-	0	0	0	8	2809,175,158,222,116,109,33,99,	0,2892,4420,5771,8820,10807,13465,14798,	YES
chr10	26837887	26860108	TCONS_00008352	1000	-	0	0	0	9	2809,175,158,222,116,109,33,111,337,	0,2892,4420,5771,8820,10807,13465,14798,21884,	YES
chr10	26840208	26860108	TCONS_00008353	1000	-	0	0	0	9	488,175,158,222,116,109,33,111,337,	0,571,2099,3450,6499,8486,11144,12477,19563,	YES
chr10	26846707	26859978	TCONS_00008354	1000	-	0	0	0	6	116,63,109,33,111,207,	0,1230,1987,4645,5978,13064,	YES
chr10	26903501	26908059	TCONS_00008355	1000	-	0	0	0	2	4084,140,	0,4418,	YES
chr10	26903501	27045750	TCONS_00008356	1000	-	0	0	0	23	4084,142,287,131,152,212,114,867,210,126,240,820,31,190,97,188,1038,237,232,189,1691,4,36,	0,4418,4914,5292,5789,6874,7174,9817,11165,13082,16168,18426,19313,25488,25853,26185,27445,30686,33437,36154,139678,141502,142213,	YES
chr10	26903501	27045750	TCONS_00008357	1000	-	0	0	0	23	4084,142,287,131,152,212,114,867,210,129,240,820,31,190,97,188,1038,237,232,189,1691,4,36,	0,4418,4914,5292,5789,6874,7174,9817,11165,13082,16168,18426,19313,25488,25853,26185,27445,30686,33437,36154,139678,141502,142213,	YES
chr10	26903501	27045750	TCONS_00008358	1000	-	0	0	0	23	4084,142,287,131,152,212,120,861,210,129,240,820,31,190,97,188,1038,237,232,189,1691,4,36,	0,4418,4914,5292,5789,6874,7174,9823,11165,13082,16168,18426,19313,25488,25853,26185,27445,30686,33437,36154,139678,141502,142213,	YES
chr10	26903501	27045750	TCONS_00008359	1000	-	0	0	0	23	2476,45,287,131,152,212,120,861,210,129,240,820,31,190,97,188,1038,237,232,189,1691,4,36,	0,4515,4914,5292,5789,6874,7174,9823,11165,13082,16168,18426,19313,25488,25853,26185,27445,30686,33437,36154,139678,141502,142213,	YES
chr10	26903501	27045750	TCONS_00008360	1000	-	0	0	0	22	4084,142,287,131,152,212,120,861,210,129,240,850,158,97,188,1038,237,232,189,1691,4,36,	0,4418,4914,5292,5789,6874,7174,9823,11165,13082,16168,18426,25520,25853,26185,27445,30686,33437,36154,139678,141502,142213,	YES
chr10	26903501	27064458	TCONS_00008361	1000	-	0	0	0	21	2476,45,287,131,152,212,120,861,210,129,240,850,158,97,188,1038,237,232,189,1824,341,	0,4515,4914,5292,5789,6874,7174,9823,11165,13082,16168,18426,25520,25853,26185,27445,30686,33437,36154,139678,160616,	YES
chr10	26903961	26908524	TCONS_00008362	1000	-	0	0	0	3	2016,45,109,	0,4055,4454,	YES
chr10	26904961	27045750	TCONS_00008363	1000	-	0	0	0	23	2624,142,287,131,152,212,120,861,210,129,240,820,31,190,97,188,1038,237,232,189,1691,4,36,	0,2958,3454,3832,4329,5414,5714,8363,9705,11622,14708,16966,17853,24028,24393,24725,25985,29226,31977,34694,138218,140042,140753,	YES
chr10	27150375	27203780	TCONS_00007026	1000	+	0	0	0	30	91,148,87,268,226,84,62,97,176,82,153,166,24,192,85,141,193,159,157,118,213,79,163,186,132,47,187,305,24,3755,	0,1260,1592,3027,3489,6793,10349,15691,15913,17123,18253,20145,22427,24416,24729,25169,25398,27221,27493,28574,31311,34994,35156,35401,36988,42635,42756,44211,46559,49650,	YES
chr10	27150375	27203847	TCONS_00007027	1000	+	0	0	0	29	91,148,87,268,226,84,62,97,176,82,153,166,192,85,141,193,159,157,118,213,79,163,186,132,47,187,305,24,3822,	0,1260,1592,3027,3489,6793,10349,15691,15913,17123,18253,20145,24416,24729,25169,25398,27221,27493,28574,31311,34994,35156,35401,36988,42635,42756,44211,46559,49650,	YES
chr10	27150375	27203847	TCONS_00007028	1000	+	0	0	0	32	91,148,87,268,226,84,62,97,176,82,153,166,24,192,85,141,193,159,157,118,213,79,163,186,138,39,16,22,49,171,305,3822,	0,1260,1592,3027,3489,6793,10349,15691,15913,17123,18253,20145,22427,24416,24729,25169,25398,27221,27493,28574,31311,34994,35156,35401,36988,38647,39727,40448,40497,42772,44211,49650,	YES
chr10	27150375	27203847	TCONS_00007029	1000	+	0	0	0	29	91,148,87,268,226,84,62,97,176,82,153,166,24,192,85,141,193,159,157,118,213,79,163,186,132,47,187,305,3822,	0,1260,1592,3027,3489,6793,10349,15691,15913,17123,18253,20145,22427,24416,24729,25169,25398,27221,27493,28574,31311,34994,35156,35401,36988,42635,42756,44211,49650,	YES
chr10	27150375	27203847	TCONS_00007030	1000	+	0	0	0	30	91,148,87,268,226,84,62,97,176,85,153,157,30,192,85,141,193,159,157,121,213,79,163,186,132,39,47,187,305,3822,	0,1260,1592,3027,3489,6793,10349,15691,15913,17120,18253,20154,22421,24416,24729,25169,25398,27221,27493,28571,31311,34994,35156,35401,36988,38647,42635,42756,44211,49650,	YES
chr10	27150375	27203847	TCONS_00007031	1000	+	0	0	0	32	91,148,87,268,226,84,62,97,176,85,153,169,30,192,85,141,193,159,157,121,213,79,163,186,144,39,16,22,49,171,218,3822,	0,1260,1592,3027,3489,6793,10349,15691,15913,17120,18253,20142,22421,24416,24729,25169,25398,27221,27493,28571,31311,34994,35156,35401,36982,38647,39727,40448,40497,42772,44298,49650,	YES
chr10	27150375	27203847	TCONS_00007032	1000	+	0	0	0	29	91,148,87,268,226,84,62,97,176,85,153,169,30,192,85,141,193,159,157,118,213,79,163,186,132,47,187,305,3822,	0,1260,1592,3027,3489,6793,10349,15691,15913,17120,18253,20142,22421,24416,24729,25169,25398,27221,27493,28574,31311,34994,35156,35401,36988,42635,42756,44211,49650,	YES
chr10	27151659	27200793	TCONS_00007033	1000	+	0	0	0	31	124,87,268,226,84,62,97,176,85,153,169,30,192,85,141,193,159,157,121,213,79,163,186,144,39,16,22,49,171,218,768,	0,308,1743,2205,5509,9065,14407,14629,15836,16969,18858,21137,23132,23445,23885,24114,25937,26209,27287,30027,33710,33872,34117,35698,37363,38443,39164,39213,41488,43014,48366,	YES
chr10	27205603	27232313	TCONS_00007036	1000	+	0	0	0	16	290,200,78,77,113,106,142,106,89,114,112,154,31,86,106,1118,	0,2788,5120,5630,7050,7272,10616,10847,12375,12576,12783,16255,17660,17827,20203,25592,	YES
chr10	272100	275808	TCONS_00007609	1000	-	0	0	0	7	307,122,199,63,158,89,204,	0,674,929,1340,1633,2615,3504,	YES
chr10	272186	273691	TCONS_00007610	1000	-	0	0	0	4	221,122,199,251,	0,588,843,1254,	YES
chr10	2722655	2740432	TCONS_00007672	1000	-	0	0	0	11	48,56,82,143,70,74,121,135,146,25,29,	0,6787,6926,9153,10070,11296,11475,14044,15073,16503,17748,	YES
chr10	2722957	2740446	TCONS_00007673	1000	-	0	0	0	13	2177,146,128,95,82,143,70,74,121,135,146,25,43,	0,4583,4804,6446,6624,8851,9768,10994,11173,13742,14771,16201,17446,	YES
chr10	2724605	2739186	TCONS_00007674	1000	-	0	0	0	12	529,146,128,95,82,143,70,74,121,135,146,28,	0,2935,3156,4798,4976,7203,8120,9346,9525,12094,13123,14553,	YES
chr10	2724712	2740412	TCONS_00007675	1000	-	0	0	0	14	428,146,128,95,82,143,14,56,74,121,135,146,25,9,	0,2828,3049,4691,4869,7096,7488,8027,9239,9418,11987,13016,14446,15691,	YES
chr10	27288351	27302736	TCONS_00007043	1000	+	0	0	0	10	83,165,217,48,155,164,97,90,138,467,	0,2237,2496,2828,3266,3570,6326,8584,9077,13918,	YES
chr10	27288351	27313795	TCONS_00007044	1000	+	0	0	0	13	83,165,217,48,155,164,97,90,138,742,185,417,591,	0,2237,2496,2828,3266,3570,6326,8584,9077,13918,16363,20652,24853,	YES
chr10	27302967	27313329	TCONS_00007045	1000	+	0	0	0	4	44,189,417,125,	0,1743,6036,10237,	YES
chr10	27302975	27313436	TCONS_00007046	1000	+	0	0	0	4	36,185,417,232,	0,1739,6028,10229,	YES
chr10	27304669	27313479	TCONS_00007047	1000	+	0	0	0	3	230,417,275,	0,4334,8535,	YES
chr10	27352111	27365423	TCONS_00008366	1000	-	0	0	0	4	1373,199,104,109,	0,6640,12993,13203,	YES
chr10	27352111	27369068	TCONS_00008367	1000	-	0	0	0	5	1373,199,104,111,937,	0,6640,12993,13203,16020,	YES
chr10	27352111	27373079	TCONS_00008368	1000	-	0	0	0	5	1373,199,104,111,95,	0,6640,12993,13203,20873,	YES
chr10	27352111	27379624	TCONS_00008369	1000	-	0	0	0	6	1373,199,104,111,150,246,	0,6640,12993,13203,26906,27267,	YES
chr10	27462605	27467537	TCONS_00007058	1000	+	0	0	0	4	85,152,85,633,	0,1733,4142,4299,	YES
chr10	27462605	27469097	TCONS_00007059	1000	+	0	0	0	4	85,152,85,2193,	0,1733,4142,4299,	YES
chr10	27507432	27560986	TCONS_00007062	1000	+	0	0	0	27	355,58,96,54,182,140,75,267,162,156,288,60,172,687,381,1182,241,173,49,543,70,50,121,100,74,115,1760,	0,12289,14082,14285,14971,17744,18242,19428,20777,21128,22950,24593,25008,26698,29272,34439,38321,38642,41674,41824,44903,45060,47157,50421,50614,51606,51794,	YES
chr10	27507432	27560986	TCONS_00007063	1000	+	0	0	0	30	355,58,96,54,182,140,75,267,162,156,288,60,172,687,381,420,351,690,1182,241,173,49,543,70,50,112,100,74,115,1760,	0,12289,14082,14285,14971,17744,18242,19428,20777,21128,22950,24593,25008,26698,29272,29959,31263,31866,34439,38321,38642,41674,41824,44903,45060,47166,50421,50614,51606,51794,	YES
chr10	27507672	27560986	TCONS_00007065	1000	+	0	0	0	23	115,58,96,54,182,140,75,267,162,60,172,1182,241,173,49,543,70,50,112,100,74,115,1760,	0,12049,13842,14045,14731,17504,18002,19188,20537,24353,24768,34199,38081,38402,41434,41584,44663,44820,46926,50181,50374,51366,51554,	YES
chr10	27507672	27560986	TCONS_00007066	1000	+	0	0	0	22	115,58,96,54,182,140,75,267,162,60,157,241,173,49,543,70,50,121,100,74,115,1760,	0,12049,13842,14045,14731,17504,18002,19188,20537,24353,24783,38081,38402,41434,41584,44663,44820,46917,50181,50374,51366,51554,	YES
chr10	27507683	27560986	TCONS_00007067	1000	+	0	0	0	30	104,58,96,54,182,140,75,267,162,156,288,60,172,687,381,420,351,690,1182,241,173,49,543,70,50,121,100,74,115,1760,	0,12038,13831,14034,14720,17493,17991,19177,20526,20877,22699,24342,24757,26447,29021,29708,31012,31615,34188,38070,38391,41423,41573,44652,44809,46906,50170,50363,51355,51543,	YES
chr10	27542961	27559386	TCONS_00007068	1000	+	0	0	0	12	92,241,173,49,543,70,50,112,100,74,115,160,	0,2792,3113,6145,6295,9374,9531,11637,14892,15085,16077,16265,	YES
chr10	27562146	27568524	TCONS_00007069	1000	+	0	0	0	6	271,73,96,96,132,665,	0,2571,2725,2914,3282,5713,	YES
chr10	27562146	27569201	TCONS_00007070	1000	+	0	0	0	6	271,73,96,96,132,1342,	0,2571,2725,2914,3282,5713,	YES
chr10	27562177	27569201	TCONS_00007071	1000	+	0	0	0	5	240,73,78,132,1342,	0,2540,2901,3251,5682,	YES
chr10	27570662	27573536	TCONS_00007072	1000	+	0	0	0	3	67,12,668,	0,368,2206,	YES
chr10	27579910	27596158	TCONS_00007073	1000	+	0	0	0	11	144,88,168,102,59,167,222,274,223,1444,1206,	0,560,758,3146,3333,3972,5433,6151,12157,13396,15042,	YES
chr10	27579910	27596158	TCONS_00007074	1000	+	0	0	0	10	144,88,168,102,59,167,222,274,223,2852,	0,560,758,3146,3333,3972,5433,6151,12157,13396,	YES
chr10	27580470	27596154	TCONS_00007075	1000	+	0	0	0	10	88,168,102,59,167,222,274,223,1444,1202,	0,198,2586,2773,3412,4873,5591,11597,12836,14482,	YES
chr10	27597457	27607923	TCONS_00007076	1000	+	0	0	0	11	177,130,147,220,904,216,84,135,122,88,493,	0,352,1563,1855,3523,7044,7338,9072,9312,9799,9973,	YES
chr10	27612249	27620724	TCONS_00008376	1000	-	0	0	0	3	76,1578,137,	0,5572,8338,	YES
chr10	27617746	27620724	TCONS_00008377	1000	-	0	0	0	2	1653,137,	0,2841,	YES
chr10	27622600	27625368	TCONS_00008378	1000	-	0	0	0	4	147,125,148,111,	0,231,2307,2657,	YES
chr10	27625587	27627496	TCONS_00007080	1000	+	0	0	0	5	86,85,145,56,522,	0,187,736,1053,1387,	YES
chr10	27627304	27632837	TCONS_00008379	1000	-	0	0	0	2	192,315,	0,5218,	YES
chr10	27633667	27634975	TCONS_00008380	1000	-	0	0	0	2	445,406,	0,902,	YES
chr10	27641758	27645077	TCONS_00008382	1000	-	0	0	0	4	467,157,40,350,	0,1728,2775,2969,	YES
chr10	27641758	27645077	TCONS_00008383	1000	-	0	0	0	2	467,350,	0,2969,	YES
chr10	27641761	27644963	TCONS_00008384	1000	-	0	0	0	3	464,40,236,	0,2772,2966,	YES
chr10	27641763	27644617	TCONS_00008385	1000	-	0	0	0	3	462,157,84,	0,1723,2770,	YES
chr10	27642063	27644906	TCONS_00008386	1000	-	0	0	0	3	162,51,179,	0,2470,2664,	YES
chr10	27688134	27694479	TCONS_00007081	1000	+	0	0	0	10	172,107,125,64,144,102,157,143,54,444,	0,307,501,752,1926,2154,4932,5323,5679,5901,	YES
chr10	27703730	27724002	TCONS_00007084	1000	+	0	0	0	3	787,98,47,	0,6364,20225,	YES
chr10	27703743	27728527	TCONS_00007085	1000	+	0	0	0	5	774,98,413,165,1302,	0,6351,21243,22821,23482,	YES
chr10	27731535	27793733	TCONS_00007086	1000	+	0	0	0	7	228,170,205,156,123,139,939,	0,37267,52891,59367,59619,59881,61259,	YES
chr10	27731535	27794922	TCONS_00007087	1000	+	0	0	0	7	228,170,205,156,123,139,2128,	0,37267,52891,59367,59619,59881,61259,	YES
chr10	27818196	27832537	TCONS_00008390	1000	-	0	0	0	14	2458,250,84,81,142,72,30,72,96,45,239,278,224,146,	0,3189,4598,6065,6488,7229,7710,8046,8417,10796,12342,12718,13803,14195,	YES
chr10	27818196	27832537	TCONS_00008391	1000	-	0	0	0	14	2458,250,84,81,142,69,30,72,96,45,239,278,224,146,	0,3189,4598,6065,6488,7229,7710,8046,8417,10796,12342,12718,13803,14195,	YES
chr10	27818196	27857630	TCONS_00008392	1000	-	0	0	0	17	2458,48,166,84,81,142,69,30,72,96,45,68,132,278,224,146,88,	0,3189,3273,4598,6065,6488,7229,7710,8046,8417,10796,12342,12449,12718,13803,14195,39346,	YES
chr10	27818196	27857708	TCONS_00008393	1000	-	0	0	0	17	2458,48,166,84,81,142,72,30,72,96,45,47,132,278,224,146,166,	0,3189,3273,4598,6065,6488,7229,7710,8046,8417,10796,12363,12449,12718,13803,14195,39346,	YES
chr10	27818196	27859278	TCONS_00008394	1000	-	0	0	0	16	2458,48,166,84,81,139,72,30,72,96,45,218,278,538,49,705,	0,3189,3273,4598,6065,6488,7229,7710,8046,8417,10796,12363,12718,13803,39346,40377,	YES
chr10	27818196	27859278	TCONS_00008395	1000	-	0	0	0	18	2458,48,166,84,81,142,72,30,72,96,45,47,132,275,224,146,49,705,	0,3189,3273,4598,6065,6488,7229,7710,8046,8417,10796,12363,12449,12718,13803,14195,39346,40377,	YES
chr10	27819423	27832535	TCONS_00008396	1000	-	0	0	0	15	1231,48,166,84,81,142,72,30,72,96,45,47,132,278,536,	0,1962,2046,3371,4838,5261,6002,6483,6819,7190,9569,11136,11222,11491,12576,	YES
chr10	2786013	2815984	TCONS_00007676	1000	-	0	0	0	16	678,60,99,93,194,168,218,103,76,96,96,95,89,146,67,164,	0,3236,4987,6204,8429,10992,13054,14275,16889,19616,19800,23630,23866,25552,27198,29807,	YES
chr10	2786013	2815984	TCONS_00007677	1000	-	0	0	0	17	678,60,99,93,194,168,218,103,36,76,96,96,95,89,146,67,164,	0,3236,4987,6204,8429,10992,13054,14275,16776,16889,19616,19800,23630,23866,25552,27198,29807,	YES
chr10	2786013	2826557	TCONS_00007678	1000	-	0	0	0	17	678,60,99,93,194,168,218,103,36,76,96,96,95,89,146,67,37,	0,3236,4987,6204,8429,10992,13054,14275,16776,16889,19616,19800,23630,23866,25552,27198,40507,	YES
chr10	2786417	2815984	TCONS_00007679	1000	-	0	0	0	17	274,60,99,93,194,168,218,103,18,76,96,96,95,89,146,67,164,	0,2832,4583,5800,8025,10588,12650,13871,16372,16485,19212,19396,23226,23462,25148,26794,29403,	YES
chr10	278941	293694	TCONS_00006204	1000	+	0	0	0	5	225,170,214,130,4825,	0,1609,2229,3480,9928,	YES
chr10	278982	288971	TCONS_00006205	1000	+	0	0	0	6	184,170,214,130,106,102,	0,1568,2188,3439,6422,9887,	YES
chr10	278982	293694	TCONS_00006206	1000	+	0	0	0	6	184,161,214,130,253,1223,	0,1577,2188,3439,9887,13489,	YES
chr10	279041	288990	TCONS_00006207	1000	+	0	0	0	5	125,161,214,130,121,	0,1518,2129,3380,9828,	YES
chr10	279093	293595	TCONS_00006208	1000	+	0	0	0	7	73,170,214,130,106,253,1124,	0,1457,2077,3328,6311,9776,13378,	YES
chr10	2794065	2799229	TCONS_00007680	1000	-	0	0	0	3	571,168,162,	0,2940,5002,	YES
chr10	2794065	2815984	TCONS_00007681	1000	-	0	0	0	13	571,168,218,103,36,76,96,96,95,89,146,67,164,	0,2940,5002,6223,8724,8837,11564,11748,15578,15814,17500,19146,21755,	YES
chr10	2794448	2815879	TCONS_00007682	1000	-	0	0	0	12	188,168,218,103,76,96,96,95,89,146,67,59,	0,2557,4619,5840,8454,11181,11365,15195,15431,17117,18763,21372,	YES
chr10	2800301	2815860	TCONS_00007683	1000	-	0	0	0	10	90,36,76,96,96,95,89,146,67,40,	0,2488,2601,5328,5512,9342,9578,11264,12910,15519,	YES
chr10	2834367	2865382	TCONS_00006281	1000	+	0	0	0	20	435,243,48,75,84,63,60,78,110,134,85,145,80,124,197,174,385,140,100,2126,	0,4089,4877,6716,7638,9017,9175,11268,13440,15365,17108,19758,21371,21593,21944,24392,24873,27474,27722,28889,	YES
chr10	2834549	2865381	TCONS_00006282	1000	+	0	0	0	20	253,243,48,75,84,63,60,78,110,140,85,145,80,124,197,174,385,140,100,2125,	0,3907,4695,6534,7456,8835,8993,11086,13258,15183,16926,19576,21189,21411,21762,24210,24691,27292,27540,28707,	YES
chr10	28659153	28709271	TCONS_00008401	1000	-	0	0	0	24	1160,177,106,108,282,205,126,202,165,105,109,177,135,69,115,72,126,221,171,131,114,85,166,293,	0,3059,3699,4153,5901,7050,10963,12203,17015,20754,23645,25336,28721,30994,33446,35622,36900,40653,42163,42440,47940,48446,49502,49825,	YES
chr10	28659153	28710780	TCONS_00008402	1000	-	0	0	0	25	1160,177,106,108,282,202,126,202,165,105,109,177,135,69,115,72,126,221,171,131,114,103,139,297,361,	0,3059,3699,4153,5901,7050,10963,12203,17015,20754,23645,25336,28721,30994,33446,35622,36900,40653,42163,42440,47940,48446,49529,49825,51266,	YES
chr10	28660140	28709271	TCONS_00008403	1000	-	0	0	0	24	173,177,106,108,282,205,126,202,165,105,109,177,135,69,115,72,126,221,171,131,114,85,166,293,	0,2072,2712,3166,4914,6063,9976,11216,16028,19767,22658,24349,27734,30007,32459,34635,35913,39666,41176,41453,46953,47459,48515,48838,	YES
chr10	2868396	2878128	TCONS_00006283	1000	+	0	0	0	8	253,122,83,101,105,69,102,815,	0,1736,1953,5061,5635,7535,7733,8917,	YES
chr10	2868459	2878128	TCONS_00006284	1000	+	0	0	0	8	190,122,83,101,105,66,102,815,	0,1673,1890,4998,5572,7475,7670,8854,	YES
chr10	28708389	28710779	TCONS_00008404	1000	-	0	0	0	3	432,297,360,	0,589,2030,	YES
chr10	28711822	28799521	TCONS_00008405	1000	-	0	0	0	30	1172,101,165,155,186,159,143,224,192,220,424,190,224,168,914,200,209,91,122,82,217,723,114,163,195,198,146,169,235,606,	0,3679,4771,5955,6240,7153,7614,7937,8854,10537,10901,11445,12109,12476,12925,15104,15509,16032,16443,16782,20503,26624,33848,35532,35798,36520,43023,59542,81133,87093,	YES
chr10	28711823	28798981	TCONS_00008406	1000	-	0	0	0	30	1171,101,165,155,186,159,143,224,192,220,424,190,224,168,914,200,209,91,122,28,217,723,114,163,195,198,146,169,235,66,	0,3678,4770,5954,6239,7152,7613,7936,8853,10536,10900,11444,12108,12475,12924,15103,15508,16031,16442,16839,20502,26623,33847,35531,35797,36519,43022,59541,81132,87092,	YES
chr10	2883567	2902927	TCONS_00007684	1000	-	0	0	0	14	392,95,106,90,74,95,114,138,242,91,171,49,173,69,	0,2898,4345,4545,4712,5236,6127,6326,7786,10358,12746,13321,17275,19291,	YES
chr10	2883568	2902927	TCONS_00007685	1000	-	0	0	0	14	391,95,106,90,74,95,114,138,242,91,171,155,162,69,	0,2897,4344,4544,4711,5235,6126,6325,7785,10357,12745,13320,17285,19290,	YES
chr10	28842045	28850950	TCONS_00007088	1000	+	0	0	0	9	175,440,77,101,154,159,66,102,910,	0,1301,1850,2732,4596,4838,6100,6307,7995,	YES
chr10	28842077	28844028	TCONS_00007089	1000	+	0	0	0	3	143,440,133,	0,1269,1818,	YES
chr10	28851024	28875423	TCONS_00008407	1000	-	0	0	0	15	3447,113,108,78,63,108,91,91,101,58,148,69,118,44,325,	0,5256,9124,9340,9519,9675,13350,13950,14154,15643,18393,19913,21605,21811,24074,	YES
chr10	28851024	28875454	TCONS_00008408	1000	-	0	0	0	15	3447,113,108,78,63,108,69,91,101,58,148,69,118,44,356,	0,5256,9124,9340,9519,9675,13372,13950,14154,15643,18393,19913,21605,21811,24074,	YES
chr10	28854124	28875423	TCONS_00008409	1000	-	0	0	0	15	347,113,108,78,63,108,91,91,101,58,148,69,118,44,325,	0,2156,6024,6240,6419,6575,10250,10850,11054,12543,15293,16813,18505,18711,20974,	YES
chr10	2893911	2902927	TCONS_00007686	1000	-	0	0	0	5	105,171,49,173,69,	0,2402,2977,6931,8947,	YES
chr10	2895669	2902927	TCONS_00007687	1000	-	0	0	0	3	1374,162,70,	0,5184,7188,	YES
chr10	28988529	28991098	TCONS_00007091	1000	+	0	0	0	2	106,928,	0,1641,	YES
chr10	28990156	28991087	TCONS_00007092	1000	+	0	0	0	1	931,	0,	YES
chr10	28992811	29050694	TCONS_00008413	1000	-	0	0	0	31	1322,76,222,171,111,132,150,168,273,158,193,184,146,123,235,143,126,164,181,165,138,123,153,201,198,174,114,162,269,208,260,	0,2543,3963,4270,6757,6949,7241,8054,8311,9219,9466,9921,10677,11963,12168,13375,13597,17041,21526,21804,23766,24051,24259,26924,28416,38067,38970,39820,40348,44522,57623,	YES
chr10	28999197	28999867	TCONS_00008414	1000	-	0	0	0	2	482,107,	0,563,	YES
chr10	28999197	29050694	TCONS_00008415	1000	-	0	0	0	27	482,132,150,168,273,158,193,184,146,123,235,143,126,164,181,165,138,123,153,201,198,174,114,162,269,208,260,	0,563,855,1668,1925,2833,3080,3535,4291,5577,5782,6989,7211,10655,15140,15418,17380,17665,17873,20538,22030,31681,32584,33434,33962,38136,51237,	YES
chr10	29002024	29003605	TCONS_00008416	1000	-	0	0	0	3	446,184,117,	0,708,1464,	YES
chr10	2903211	2905375	TCONS_00006285	1000	+	0	0	0	4	71,86,115,136,	0,475,643,2028,	YES
chr10	2903211	2909366	TCONS_00006286	1000	+	0	0	0	8	71,30,86,115,136,118,150,83,	0,340,475,643,2028,4187,4466,6072,	YES
chr10	2903211	2925111	TCONS_00006287	1000	+	0	0	0	19	71,63,86,115,136,118,150,211,111,164,118,129,138,225,147,109,189,173,220,	0,307,475,643,2028,4187,4466,6072,6363,6738,8104,9747,12012,15818,16303,18090,18403,21004,21680,	YES
chr10	2903211	2925211	TCONS_00006288	1000	+	0	0	0	19	71,60,86,115,136,118,150,211,111,164,118,129,138,225,147,109,189,173,320,	0,310,475,643,2028,4187,4466,6072,6363,6738,8104,9747,12012,15818,16303,18090,18403,21004,21680,	YES
chr10	2903211	2925211	TCONS_00006289	1000	+	0	0	0	18	71,86,115,136,118,150,211,111,164,118,129,138,225,147,109,189,173,320,	0,475,643,2028,4187,4466,6072,6363,6738,8104,9747,12012,15818,16303,18090,18403,21004,21680,	YES
chr10	2903211	2925211	TCONS_00006290	1000	+	0	0	0	22	71,30,86,115,136,72,150,212,111,164,118,49,50,52,137,138,268,155,109,257,153,261,	0,340,475,643,2028,4187,4466,6071,6363,6738,8104,8632,9148,9318,9739,12012,15818,16295,18090,18391,21024,21739,	YES
chr10	2903211	2925211	TCONS_00006291	1000	+	0	0	0	19	71,30,86,115,136,118,150,211,111,164,118,129,138,225,147,109,189,173,320,	0,340,475,643,2028,4187,4466,6072,6363,6738,8104,9747,12012,15818,16303,18090,18403,21004,21680,	YES
chr10	2903245	2907470	TCONS_00006292	1000	+	0	0	0	6	37,60,86,115,136,72,	0,276,441,609,1994,4153,	YES
chr10	2903686	2925001	TCONS_00006293	1000	+	0	0	0	20	86,115,136,72,150,212,111,164,118,49,50,52,137,138,268,155,109,257,153,51,	0,168,1553,3712,3991,5596,5888,6263,7629,8157,8673,8843,9264,11537,15343,15820,17615,17916,20549,21264,	YES
chr10	29052596	29062709	TCONS_00008417	1000	-	0	0	0	5	624,202,138,207,122,	0,959,5966,6212,9991,	YES
chr10	29052596	29062709	TCONS_00008418	1000	-	0	0	0	5	396,150,138,207,122,	0,1011,5966,6212,9991,	YES
chr10	29052598	29062650	TCONS_00008419	1000	-	0	0	0	5	396,145,138,207,63,	0,1014,5964,6210,9989,	YES
chr10	29052989	29054266	TCONS_00008420	1000	-	0	0	0	2	231,711,	0,566,	YES
chr10	29151193	29201286	TCONS_00008425	1000	-	0	0	0	27	976,196,9,192,99,98,139,133,201,198,52,12,23,14,133,75,106,17,26,44,44,68,202,258,172,82,314,	0,4096,7342,7419,7979,8320,11535,13686,13867,14101,18016,18521,19864,21287,21655,23161,23377,24762,24853,25058,28550,28964,31427,32886,34673,44367,49779,	YES
chr10	29151193	29201286	TCONS_00008426	1000	-	0	0	0	26	976,196,9,192,90,149,139,133,201,198,52,12,23,14,133,322,17,26,44,44,68,202,258,172,82,314,	0,4096,7342,7419,7979,8269,11535,13686,13867,14101,18016,18521,19864,21287,21655,23161,24762,24853,25058,28550,28964,31427,32886,34673,44367,49779,	YES
chr10	29151193	29201286	TCONS_00008427	1000	-	0	0	0	25	976,196,9,192,99,98,139,133,201,198,52,12,23,14,133,322,17,26,44,44,68,202,258,172,314,	0,4096,7342,7419,7979,8320,11535,13686,13867,14101,18016,18521,19864,21287,21655,23161,24762,24853,25058,28550,28964,31427,32886,34673,49779,	YES
chr10	29151193	29201286	TCONS_00008428	1000	-	0	0	0	25	976,196,192,99,98,139,133,201,198,52,12,23,14,133,322,17,26,44,44,68,202,258,172,82,314,	0,4096,7419,7979,8320,11535,13686,13867,14101,18016,18521,19864,21287,21655,23161,24762,24853,25058,28550,28964,31427,32886,34673,44367,49779,	YES
chr10	29151193	29201291	TCONS_00008429	1000	-	0	0	0	22	976,196,9,192,90,149,139,853,78,78,75,106,17,26,44,44,68,202,258,172,82,319,	0,4096,7342,7419,7979,8269,11535,13686,17531,23000,23161,23377,24762,24853,25058,28550,28964,31427,32886,34673,44367,49779,	YES
chr10	29151193	29201327	TCONS_00008430	1000	-	0	0	0	22	976,193,192,99,98,139,133,201,438,75,78,322,17,26,44,44,68,202,258,172,82,355,	0,4096,7419,7979,8320,11535,13686,13867,14101,17531,23000,23161,24762,24853,25058,28550,28964,31427,32886,34673,44367,49779,	YES
chr10	29151193	29201386	TCONS_00008431	1000	-	0	0	0	24	976,193,192,90,149,139,613,52,12,23,14,133,75,106,17,26,44,44,68,202,258,172,82,414,	0,4096,7419,7979,8269,11535,13686,18016,18521,19864,21287,21655,23161,23377,24762,24853,25058,28550,28964,31427,32886,34673,44367,49779,	YES
chr10	29152087	29186025	TCONS_00008432	1000	-	0	0	0	24	82,196,9,192,99,98,139,133,201,198,52,12,23,14,133,322,17,26,44,44,68,202,258,159,	0,3202,6448,6525,7085,7426,10641,12792,12973,13207,17122,17627,18970,20393,20761,22267,23868,23959,24164,27656,28070,30533,31992,33779,	YES
chr10	29159172	29165453	TCONS_00008434	1000	-	0	0	0	4	90,149,139,574,	0,290,3556,5707,	YES
chr10	29180157	29201090	TCONS_00008435	1000	-	0	0	0	6	68,202,258,172,82,118,	0,2463,3922,5709,15403,20815,	YES
chr10	29184079	29201286	TCONS_00008436	1000	-	0	0	0	3	258,172,314,	0,1787,16893,	YES
chr10	29269281	29412166	TCONS_00007096	1000	+	0	0	0	19	263,163,251,147,157,122,138,88,132,192,153,357,86,129,65,105,156,123,1018,	0,890,2128,63458,81555,84904,91437,95933,96115,103338,108264,108497,110535,136232,136478,136670,139641,139878,141867,	YES
chr10	29269281	29413473	TCONS_00007097	1000	+	0	0	0	19	263,163,251,147,157,122,138,88,132,192,168,357,86,129,65,105,156,123,2325,	0,890,2128,63458,81555,84904,91437,95933,96115,103338,108249,108497,110535,136232,136478,136670,139641,139878,141867,	YES
chr10	29270181	29411399	TCONS_00007098	1000	+	0	0	0	18	153,251,147,157,122,138,88,132,192,168,357,86,129,65,105,156,123,251,	0,1228,62558,80655,84004,90537,95033,95215,102438,107349,107597,109635,135332,135578,135770,138741,138978,140967,	YES
chr10	29413529	29443235	TCONS_00008437	1000	-	0	0	0	15	1442,124,115,27,130,122,127,113,133,125,174,88,65,220,107,	0,5127,5507,5902,8918,12003,13788,14018,16980,17226,20476,22110,27217,29203,29599,	YES
chr10	29413529	29443326	TCONS_00008438	1000	-	0	0	0	14	1442,124,27,130,122,127,113,133,125,174,88,65,220,198,	0,5127,5902,8918,12003,13788,14018,16980,17226,20476,22110,27217,29203,29599,	YES
chr10	29413529	29443326	TCONS_00008439	1000	-	0	0	0	14	1442,124,115,130,122,127,113,133,125,174,88,65,220,198,	0,5127,5507,8918,12003,13788,14018,16980,17226,20476,22110,27217,29203,29599,	YES
chr10	29413529	29443326	TCONS_00008440	1000	-	0	0	0	12	1442,124,27,130,113,133,125,174,88,65,220,198,	0,5127,5902,8918,14018,16980,17226,20476,22110,27217,29203,29599,	YES
chr10	29413529	29517545	TCONS_00008441	1000	-	0	0	0	16	1442,124,115,27,130,122,127,113,133,125,174,88,65,220,107,211,	0,5127,5507,5902,8918,12003,13788,14018,16980,17226,20476,22110,27217,29203,29599,103805,	YES
chr10	29418658	29442898	TCONS_00008442	1000	-	0	0	0	10	122,27,130,113,133,125,174,88,65,166,	0,773,3789,8889,11851,12097,15347,16981,22088,24074,	YES
chr10	29418698	29443326	TCONS_00008443	1000	-	0	0	0	14	82,115,27,130,122,127,113,133,125,174,88,65,220,198,	0,338,733,3749,6834,8619,8849,11811,12057,15307,16941,22048,24034,24430,	YES
chr10	29418701	29443239	TCONS_00008444	1000	-	0	0	0	13	79,115,130,122,127,113,133,125,174,88,65,220,111,	0,335,3746,6831,8616,8846,11808,12054,15304,16938,22045,24031,24427,	YES
chr10	2951966	2970092	TCONS_00007688	1000	-	0	0	0	9	753,42,172,174,125,168,640,57,48,	0,834,2682,3023,5704,11337,13138,17756,18078,	YES
chr10	2974239	2987857	TCONS_00007689	1000	-	0	0	0	6	800,51,172,143,36,1110,	0,4190,7976,8803,11120,12508,	YES
chr10	2974239	2998599	TCONS_00007690	1000	-	0	0	0	8	800,51,172,143,36,1160,55,78,	0,4190,7976,8803,11120,12508,22725,24282,	YES
chr10	2974239	2998599	TCONS_00007691	1000	-	0	0	0	8	800,51,172,143,36,1160,86,78,	0,4190,7976,8803,11120,12508,22694,24282,	YES
chr10	2974242	2998599	TCONS_00007692	1000	-	0	0	0	9	797,51,172,143,36,1160,126,55,78,	0,4187,7973,8800,11117,12505,20598,22722,24279,	YES
chr10	298251	309850	TCONS_00007611	1000	-	0	0	0	8	929,189,189,119,185,494,367,37,	0,3281,3872,5216,6217,8574,9265,11562,	YES
chr10	29878857	29957740	TCONS_00007099	1000	+	0	0	0	21	45,142,143,76,103,94,112,107,42,86,124,140,98,153,108,117,31,100,24,60,117,	0,387,28508,30345,34671,36602,36834,41198,41699,46439,47591,47802,49936,55985,63680,66661,67567,67686,72413,76704,78766,	YES
chr10	29878857	29966096	TCONS_00007100	1000	+	0	0	0	20	165,251,143,76,103,94,112,107,42,86,124,140,98,108,96,31,100,60,105,1417,	0,278,28508,30345,34671,36602,36834,41198,41699,46439,47591,47802,49936,63680,66682,67567,67686,76704,78766,85822,	YES
chr10	29878857	29966096	TCONS_00007101	1000	+	0	0	0	22	45,142,143,76,103,94,112,107,42,86,124,140,98,153,108,117,31,100,24,60,105,1417,	0,387,28508,30345,34671,36602,36834,41198,41699,46439,47591,47802,49936,55985,63680,66661,67567,67686,72413,76704,78766,85822,	YES
chr10	29878857	29966096	TCONS_00007102	1000	+	0	0	0	21	45,142,143,76,103,94,112,107,42,86,124,140,98,153,108,96,31,100,60,105,1417,	0,387,28508,30345,34671,36602,36834,41198,41699,46439,47591,47802,49936,55985,63680,66682,67567,67686,76704,78766,85822,	YES
chr10	29878857	29966096	TCONS_00007103	1000	+	0	0	0	20	45,142,143,76,103,94,112,107,42,86,124,140,98,108,96,31,100,60,105,1417,	0,387,28508,30345,34671,36602,36834,41198,41699,46439,47591,47802,49936,63680,66682,67567,67686,76704,78766,85822,	YES
chr10	29878993	29947122	TCONS_00007104	1000	+	0	0	0	17	29,251,143,76,103,94,112,107,42,86,124,140,98,108,96,31,580,	0,142,28372,30209,34535,36466,36698,41062,41563,46303,47455,47666,49800,63544,66546,67431,67549,	YES
chr10	29878993	29947125	TCONS_00007105	1000	+	0	0	0	17	29,251,143,76,103,94,112,107,42,86,124,140,98,108,96,31,582,	0,142,28372,30209,34535,36466,36698,41062,41563,46303,47455,47666,49800,63544,66546,67431,67550,	YES
chr10	29879175	29966096	TCONS_00007106	1000	+	0	0	0	19	211,143,76,103,94,112,107,42,86,124,140,98,108,96,31,100,60,105,1417,	0,28190,30027,34353,36284,36516,40880,41381,46121,47273,47484,49618,63362,66364,67249,67368,76386,78448,85504,	YES
chr10	298997	307864	TCONS_00007612	1000	-	0	0	0	7	183,189,189,119,185,494,348,	0,2535,3126,4470,5471,7828,8519,	YES
chr10	29940102	29964686	TCONS_00007107	1000	+	0	0	0	8	26,108,129,31,100,60,105,7,	0,2435,5404,6322,6441,15459,17521,24577,	YES
chr10	29940102	29966096	TCONS_00007108	1000	+	0	0	0	8	26,108,129,31,100,60,105,1417,	0,2435,5404,6322,6441,15459,17521,24577,	YES
chr10	29945511	29965060	TCONS_00007109	1000	+	0	0	0	7	124,31,100,24,60,105,381,	0,913,1032,5759,10050,12112,19168,	YES
chr10	29965785	29977566	TCONS_00008453	1000	-	0	0	0	10	1599,140,101,113,69,92,168,169,85,53,	0,5495,8438,8616,8803,8944,9726,11322,11551,11728,	YES
chr10	30006408	30009922	TCONS_00007113	1000	+	0	0	0	4	146,520,414,1219,	0,795,1415,2295,	YES
chr10	30007229	30007988	TCONS_00007114	1000	+	0	0	0	1	759,	0,	YES
chr10	30010397	30014179	TCONS_00008454	1000	-	0	0	0	5	882,115,194,119,611,	0,1433,2130,2413,3171,	YES
chr10	30011005	30013638	TCONS_00008455	1000	-	0	0	0	5	274,115,194,119,70,	0,825,1522,1805,2563,	YES
chr10	30014881	30437891	TCONS_00007115	1000	+	0	0	0	25	208,132,158,66,162,54,51,125,170,137,145,142,60,157,103,115,177,76,100,51,102,24,173,110,91,	0,7825,44176,53430,154459,259978,283862,289125,297818,300533,303451,303727,315671,343118,351370,382528,402166,404898,410102,419308,419462,420425,422144,422706,422919,	NO
chr10	30014881	30596601	TCONS_00007116	1000	+	0	0	0	26	208,132,158,66,162,54,51,125,170,137,145,142,60,157,103,115,177,76,100,51,102,24,173,110,92,142,	0,7825,44176,53430,154459,259978,437545,442562,449129,451906,454748,455024,466761,493006,501260,537705,554537,559475,564577,574841,574995,575930,577636,578183,578396,581578,	NO
chr10	3003163	3053937	TCONS_00006302	1000	+	0	0	0	18	142,115,1928,97,168,140,214,123,156,225,83,105,151,81,163,106,177,586,	0,5073,7325,11036,25983,30988,31213,34775,34994,36783,37992,40060,40247,42500,42680,46065,48618,50188,	YES
chr10	3003165	3053712	TCONS_00006303	1000	+	0	0	0	18	140,115,1928,97,177,140,214,123,156,225,83,105,151,81,163,106,177,361,	0,5071,7323,11034,25981,30986,31211,34773,34992,36781,37990,40058,40245,42498,42678,46063,48616,50186,	YES
chr10	3003165	3053937	TCONS_00006304	1000	+	0	0	0	17	140,115,1928,97,140,214,123,156,225,83,105,151,81,163,106,177,586,	0,5071,7323,11034,30986,31211,34773,34992,36781,37990,40058,40245,42498,42678,46063,48616,50186,	YES
chr10	30080289	30437891	TCONS_00007118	1000	+	0	0	0	23	65,156,162,54,51,125,170,137,145,142,60,157,103,115,177,76,100,51,102,24,173,110,91,	0,88496,89051,194570,218454,223717,232410,235125,238043,238319,250263,277710,285962,317120,336758,339490,344694,353900,354054,355017,356736,357298,357511,	NO
chr10	30080289	30596601	TCONS_00007119	1000	+	0	0	0	24	65,156,162,54,51,125,170,137,145,142,60,157,103,115,177,76,100,51,102,24,173,110,92,142,	0,88496,89051,194570,372137,377154,383721,386498,389340,389616,401353,427598,435852,472297,489129,494067,499169,509433,509587,510522,512228,512775,512988,516170,	NO
chr10	3008281	3053710	TCONS_00006306	1000	+	0	0	0	17	70,1928,97,168,140,214,123,156,225,83,105,151,81,163,106,177,359,	0,2207,5918,20865,25870,26095,29657,29876,31665,32874,34942,35129,37382,37562,40947,43500,45070,	YES
chr10	3012235	3053715	TCONS_00006307	1000	+	0	0	0	4	65,54,177,364,	0,37045,39546,41116,	YES
chr10	301561	309850	TCONS_00007613	1000	-	0	0	0	7	160,189,119,185,494,367,37,	0,562,1906,2907,5264,5955,8252,	YES
chr10	30168785	30397524	TCONS_00007120	1000	+	0	0	0	13	84,162,54,51,125,170,137,145,142,60,157,103,115,	0,555,106074,129958,135221,143914,146629,149547,149823,161767,189214,197466,228624,	NO
chr10	30627155	30636177	TCONS_00008459	1000	-	0	0	0	12	562,86,61,67,119,129,94,75,149,77,94,79,	0,791,958,2613,2764,2978,3183,4844,5848,6690,6846,8943,	YES
chr10	30627441	30630364	TCONS_00008460	1000	-	0	0	0	7	276,99,61,67,119,129,26,	0,505,672,2327,2478,2692,2897,	YES
chr10	30642204	30659997	TCONS_00008461	1000	-	0	0	0	18	409,216,223,172,203,134,162,198,144,187,152,202,248,164,136,149,231,43,	0,503,3486,3799,8195,8615,9915,10435,10728,11815,12117,13529,14899,15808,16490,16719,17413,17750,	YES
chr10	30642284	30659812	TCONS_00008462	1000	-	0	0	0	16	639,223,172,203,134,162,198,144,187,152,202,248,164,136,149,195,	0,3406,3719,8115,8535,9835,10355,10648,11735,12037,13449,14819,15728,16410,16639,17333,	YES
chr10	30661375	30682722	TCONS_00007122	1000	+	0	0	0	24	316,73,94,79,155,77,182,116,187,135,83,133,188,139,58,77,156,182,88,257,85,253,102,744,	0,1137,1784,2008,3028,3289,3455,5238,5487,7334,7559,8213,9167,9445,9670,11324,11492,12000,13574,15452,18067,18280,18656,20603,	YES
chr10	30672892	30677160	TCONS_00007123	1000	+	0	0	0	4	131,182,88,333,	0,483,2057,3935,	YES
chr10	30723401	30724224	TCONS_00008466	1000	-	0	0	0	1	823,	0,	YES
chr10	30724443	30725341	TCONS_00007124	1000	+	0	0	0	1	898,	0,	YES
chr10	30727928	30739701	TCONS_00008467	1000	-	0	0	0	13	404,66,90,111,90,71,127,123,87,71,91,162,255,	0,657,3289,4058,5287,5469,5858,8222,8467,9462,11080,11258,11518,	YES
chr10	30727928	30739714	TCONS_00008468	1000	-	0	0	0	13	404,66,90,111,90,71,127,115,87,71,91,162,268,	0,657,3289,4058,5287,5469,5858,8230,8467,9462,11080,11258,11518,	YES
chr10	30727939	30734756	TCONS_00008469	1000	-	0	0	0	8	393,66,90,111,90,71,127,150,	0,646,3278,4047,5276,5458,5847,6667,	YES
chr10	30731986	30734757	TCONS_00008470	1000	-	0	0	0	5	111,90,71,127,151,	0,1229,1411,1800,2620,	YES
chr10	30737269	30739701	TCONS_00008471	1000	-	0	0	0	4	192,91,162,255,	0,1739,1917,2177,	YES
chr10	30757253	30761585	TCONS_00007126	1000	+	0	0	0	10	86,66,210,206,153,556,203,54,233,607,	0,648,831,1251,1669,2055,2813,3250,3380,3725,	YES
chr10	30757253	30761585	TCONS_00007127	1000	+	0	0	0	10	86,66,210,206,153,556,203,199,233,607,	0,648,831,1251,1669,2055,2813,3105,3380,3725,	YES
chr10	30757253	30761585	TCONS_00007128	1000	+	0	0	0	9	86,210,206,153,556,203,199,233,607,	0,831,1251,1669,2055,2813,3105,3380,3725,	YES
chr10	30757299	30759075	TCONS_00007129	1000	+	0	0	0	5	40,66,210,206,153,	0,602,785,1205,1623,	YES
chr10	30760433	30761467	TCONS_00007133	1000	+	0	0	0	3	124,156,398,	0,200,636,	YES
chr10	30762969	30795621	TCONS_00007135	1000	+	0	0	0	9	221,291,526,105,543,279,87,135,905,	0,345,4929,15357,18084,20671,27490,29632,31747,	YES
chr10	30783560	30794917	TCONS_00007137	1000	+	0	0	0	5	12,171,87,135,201,	0,188,6899,9041,11156,	YES
chr10	30783560	30795621	TCONS_00007138	1000	+	0	0	0	5	12,171,87,135,905,	0,188,6899,9041,11156,	YES
chr10	30804031	30810922	TCONS_00008474	1000	-	0	0	0	5	170,135,150,193,113,	0,501,1888,4077,6778,	YES
chr10	30871274	31588400	TCONS_00007141	1000	+	0	0	0	7	229,91,233,126,132,121,152,	0,539866,638963,681765,711475,713238,716974,	YES
chr10	30871372	31591695	TCONS_00007142	1000	+	0	0	0	8	131,91,233,126,132,121,152,36,	0,539768,638865,681667,711377,713140,716876,720287,	YES
chr10	3136439	3145057	TCONS_00006309	1000	+	0	0	0	2	87,1679,	0,6939,	NO
chr10	31411130	31602225	TCONS_00007143	1000	+	0	0	0	9	101,233,126,132,121,152,36,78,840,	0,99107,141909,171619,173382,177118,180529,188032,190255,	YES
chr10	31411138	31602225	TCONS_00007144	1000	+	0	0	0	7	93,233,126,132,121,152,840,	0,99099,141901,171611,173374,177110,190247,	YES
chr10	3159003	3164911	TCONS_00006310	1000	+	0	0	0	4	81,96,187,801,	0,869,1595,5107,	YES
chr10	3191217	3268574	TCONS_00007698	1000	-	0	0	0	55	3625,84,90,160,121,126,105,110,71,73,71,130,121,54,168,91,200,80,159,128,108,152,159,128,157,93,120,90,84,82,125,71,83,134,137,109,51,169,101,184,96,130,130,101,192,97,66,152,67,263,73,89,94,117,96,	0,5333,6388,7286,9036,10245,10450,12164,13825,13979,14170,16201,18088,18332,20927,21184,22951,23233,23865,26443,29104,29836,32480,33492,37064,37294,39990,40220,41528,41720,44786,45002,46200,46360,46894,48821,49579,51983,55685,55867,56146,58818,59045,59747,63577,66083,66256,66406,68211,69071,70825,71628,71815,74259,77261,	YES
chr10	3191217	3268656	TCONS_00007699	1000	-	0	0	0	55	3625,84,90,160,121,126,105,110,71,73,71,130,121,54,168,91,200,80,151,128,108,152,159,128,157,93,120,90,84,82,125,71,83,134,137,109,51,169,101,184,96,130,130,101,192,97,66,152,67,263,73,89,94,117,178,	0,5333,6388,7286,9036,10245,10450,12164,13825,13979,14170,16201,18088,18332,20927,21184,22951,23233,23865,26443,29104,29836,32480,33492,37064,37294,39990,40220,41528,41720,44786,45002,46200,46360,46894,48821,49579,51983,55685,55867,56146,58818,59045,59747,63577,66083,66256,66406,68211,69071,70825,71628,71815,74259,77261,	YES
chr10	32012061	32027846	TCONS_00008478	1000	-	0	0	0	6	344,734,215,143,192,51,	0,2803,5573,7589,12574,15734,	YES
chr10	32012346	32024819	TCONS_00008479	1000	-	0	0	0	5	59,734,215,143,184,	0,2518,5288,7304,12289,	YES
chr10	32032869	32232869	TCONS_00008481	1000	-	0	0	0	12	1296,170,77,120,98,136,186,172,137,109,72,38,	0,2912,3254,6536,10906,11417,14429,20123,46249,84087,155125,199962,	YES
chr10	32032874	32188055	TCONS_00008482	1000	-	0	0	0	11	1291,170,77,120,98,136,186,172,137,109,61,	0,2907,3249,6531,10901,11412,14424,20118,46244,84082,155120,	YES
chr10	32234966	32246226	TCONS_00007149	1000	+	0	0	0	5	125,134,103,45,4151,	0,442,652,6942,7109,	YES
chr10	32235432	32246226	TCONS_00007151	1000	+	0	0	0	3	110,103,4318,	0,186,6476,	YES
chr10	32256929	32292860	TCONS_00007152	1000	+	0	0	0	19	236,327,158,121,139,128,116,232,122,172,186,43,116,321,105,139,255,332,467,	0,5485,10848,11525,11935,13248,16931,18576,19276,21152,21649,21923,22922,23365,23891,25851,30637,31919,35464,	YES
chr10	32256984	32278655	TCONS_00007153	1000	+	0	0	0	11	181,327,158,121,139,128,116,232,122,172,77,	0,5430,10793,11470,11880,13193,16876,18521,19221,21097,21594,	YES
chr10	32260791	32295068	TCONS_00007154	1000	+	0	0	0	19	244,327,158,121,139,128,116,232,122,172,186,43,116,321,105,139,255,332,2675,	0,1623,6986,7663,8073,9386,13069,14714,15414,17290,17787,18061,19060,19503,20029,21989,26775,28057,31602,	YES
chr10	32260977	32292605	TCONS_00007155	1000	+	0	0	0	19	58,327,158,121,139,128,116,232,122,172,186,43,116,321,105,139,255,332,212,	0,1437,6800,7477,7887,9200,12883,14528,15228,17104,17601,17875,18874,19317,19843,21803,26589,27871,31416,	YES
chr10	32275584	32307088	TCONS_00008484	1000	-	0	0	0	4	104,154,119,169,	0,596,22810,31335,	YES
chr10	32312905	32453207	TCONS_00008485	1000	-	0	0	0	27	790,143,174,105,185,222,145,276,140,40,228,178,125,217,122,167,169,82,206,172,125,128,139,121,158,327,460,	0,4421,6038,6288,6596,8892,14926,17206,20334,20573,21732,24556,25605,27614,27921,29315,37129,39768,53481,58691,66308,79155,81242,81485,86234,122817,139842,	YES
chr10	32312905	32453229	TCONS_00008486	1000	-	0	0	0	27	790,140,174,105,185,222,145,276,140,40,228,178,125,217,122,167,169,82,206,172,125,128,139,121,158,327,482,	0,4421,6038,6288,6596,8892,14926,17206,20334,20573,21732,24556,25605,27614,27921,29315,37129,39768,53481,58691,66308,79155,81242,81485,86234,122817,139842,	YES
chr10	32312905	32521605	TCONS_00008487	1000	-	0	0	0	28	790,143,174,105,185,222,145,276,140,40,228,178,125,217,122,167,169,82,206,172,125,128,139,121,158,327,698,76,	0,4421,6038,6288,6596,8892,14926,17206,20334,20573,21732,24556,25605,27614,27921,29315,37129,39768,53481,58691,66308,79155,81242,81485,86234,122817,205034,208624,	YES
chr10	32312905	32578299	TCONS_00008488	1000	-	0	0	0	29	790,140,174,105,185,222,145,276,140,40,228,178,125,217,122,167,169,82,206,172,125,128,139,121,158,327,698,51,53,	0,4421,6038,6288,6596,8892,14926,17206,20334,20573,21732,24556,25605,27614,27921,29315,37129,39768,53481,58691,66308,79155,81242,81485,86234,122817,205034,255992,265341,	YES
chr10	32313241	32518450	TCONS_00008489	1000	-	0	0	0	27	454,140,174,105,185,222,145,276,140,40,228,178,125,217,122,167,169,82,206,172,125,128,139,121,158,327,511,	0,4085,5702,5952,6260,8556,14590,16870,19998,20237,21396,24220,25269,27278,27585,28979,36793,39432,53145,58355,65972,78819,80906,81149,85898,122481,204698,	YES
chr10	32600557	32682350	TCONS_00007159	1000	+	0	0	0	7	374,149,202,156,123,130,1968,	0,67732,74012,76123,76826,79618,79825,	YES
chr10	32693280	32737407	TCONS_00008490	1000	-	0	0	0	10	905,66,76,81,275,166,87,100,370,28,	0,13137,13408,13590,18628,22288,23856,26243,33270,44099,	YES
chr10	32693280	32737634	TCONS_00008491	1000	-	0	0	0	10	905,66,76,81,275,166,87,100,358,255,	0,13137,13408,13590,18628,22288,23856,26243,33270,44099,	YES
chr10	3272580	3302687	TCONS_00007700	1000	-	0	0	0	9	4746,74,116,105,85,139,100,108,259,	0,6713,6868,7069,8855,11000,13280,17630,29848,	YES
chr10	3272580	3302687	TCONS_00007701	1000	-	0	0	0	10	3721,97,74,116,105,85,139,100,108,259,	0,4649,6713,6868,7069,8855,11000,13280,17630,29848,	YES
chr10	32755002	32760714	TCONS_00008492	1000	-	0	0	0	6	353,143,176,165,157,456,	0,1493,1756,3377,4043,5256,	YES
chr10	3276145	3302671	TCONS_00007702	1000	-	0	0	0	10	156,97,74,116,105,85,139,100,108,243,	0,1084,3148,3303,3504,5290,7435,9715,14065,26283,	YES
chr10	32906128	32926037	TCONS_00007163	1000	+	0	0	0	3	187,512,40,	0,2070,19869,	YES
chr10	32906128	32993054	TCONS_00007164	1000	+	0	0	0	5	187,242,160,99,1324,	0,2070,2422,82955,85602,	YES
chr10	32906128	32993054	TCONS_00007165	1000	+	0	0	0	4	187,512,99,1324,	0,2070,82955,85602,	YES
chr10	33005696	33012869	TCONS_00007166	1000	+	0	0	0	7	155,73,824,331,61,298,706,	0,1285,1491,3795,4979,5134,6467,	YES
chr10	33007024	33013081	TCONS_00007167	1000	+	0	0	0	6	30,824,331,61,298,918,	0,163,2467,3651,3806,5139,	YES
chr10	33013482	33019196	TCONS_00007168	1000	+	0	0	0	5	271,121,78,37,2185,	0,1107,1706,2457,3529,	YES
chr10	33013958	33019196	TCONS_00007169	1000	+	0	0	0	5	67,121,78,37,2185,	0,631,1230,1981,3053,	YES
chr10	33021145	33027573	TCONS_00007170	1000	+	0	0	0	5	271,121,108,37,1801,	0,839,3269,4495,4627,	YES
chr10	33021145	33038508	TCONS_00007171	1000	+	0	0	0	13	271,121,108,37,1829,28,1763,49,44,1850,37,84,5631,	0,839,3269,4495,4627,6557,6697,8552,8935,9315,11343,11562,11732,	YES
chr10	33021145	33038508	TCONS_00007172	1000	+	0	0	0	14	271,121,108,37,1829,28,1763,49,44,49,1850,37,84,5631,	0,839,3269,4495,4627,6557,6697,8552,8935,9175,9315,11343,11562,11732,	YES
chr10	33021327	33039959	TCONS_00007173	1000	+	0	0	0	15	89,121,108,37,1829,28,1763,49,44,49,1850,37,84,1533,20,	0,657,3087,4313,4445,6375,6515,8370,8753,8993,9133,11161,11380,11550,18612,	YES
chr10	33059095	33077995	TCONS_00007174	1000	+	0	0	0	6	241,202,227,281,293,927,	0,1839,3170,8055,12450,17973,	YES
chr10	3307330	3325707	TCONS_00006311	1000	+	0	0	0	9	153,72,50,153,53,222,151,58,720,	0,2785,2944,8618,11695,11824,12568,14720,17657,	YES
chr10	3307330	3325715	TCONS_00006312	1000	+	0	0	0	10	153,109,72,50,153,53,222,151,58,728,	0,965,2785,2944,8618,11695,11824,12568,14720,17657,	YES
chr10	33214578	33448859	TCONS_00008493	1000	-	0	0	0	15	5973,92,76,166,61,88,85,127,106,86,75,162,35,118,108,	0,22056,84786,123691,131172,131560,138445,153641,173808,203668,203925,205530,218918,221308,234173,	YES
chr10	33214578	33449095	TCONS_00008494	1000	-	0	0	0	15	5973,92,76,166,61,88,85,127,69,36,75,162,35,118,344,	0,22056,84786,123691,131172,131560,138445,153641,173808,203718,203925,205530,218918,221308,234173,	YES
chr10	33219647	33449095	TCONS_00008495	1000	-	0	0	0	15	904,92,76,166,61,88,85,127,69,36,75,162,35,118,344,	0,16987,79717,118622,126103,126491,133376,148572,168739,198649,198856,200461,213849,216239,229104,	YES
chr10	3329445	3339864	TCONS_00007703	1000	-	0	0	0	2	3451,87,	0,10332,	NO
chr10	3331217	3339864	TCONS_00007704	1000	-	0	0	0	2	1679,87,	0,8560,	NO
chr10	33338367	33420253	TCONS_00008496	1000	-	0	0	0	9	68,61,88,85,127,106,86,75,145,	0,7383,7771,14656,29852,50019,79879,80136,81741,	YES
chr10	3344273	3366709	TCONS_00006314	1000	+	0	0	0	12	315,162,154,190,114,149,76,139,110,90,104,399,	0,4501,5923,8644,11626,11925,16778,17235,18854,19348,19530,22037,	NO
chr10	3344273	3367156	TCONS_00006315	1000	+	0	0	0	12	315,162,151,190,114,149,76,139,110,90,104,846,	0,4501,5926,8644,11626,11925,16778,17235,18854,19348,19530,22037,	NO
chr10	3344356	3349118	TCONS_00006316	1000	+	0	0	0	2	232,344,	0,4418,	NO
chr10	33452159	33478727	TCONS_00008497	1000	-	0	0	0	8	5140,203,175,205,71,108,129,40,	0,7700,12776,14952,21971,22126,24713,26528,	YES
chr10	33452159	33479004	TCONS_00008498	1000	-	0	0	0	9	5140,43,10,175,205,71,108,129,317,	0,7700,7893,12776,14952,21971,22126,24713,26528,	YES
chr10	33452159	33479004	TCONS_00008499	1000	-	0	0	0	9	5140,43,10,175,205,86,108,129,317,	0,7700,7893,12776,14952,21971,22126,24713,26528,	YES
chr10	33456751	33478826	TCONS_00008500	1000	-	0	0	0	8	548,203,175,205,86,108,129,139,	0,3108,8184,10360,17379,17534,20121,21936,	YES
chr10	33489318	33565422	TCONS_00008501	1000	-	0	0	0	6	948,200,175,205,179,26,	0,4498,6974,7882,15821,76078,	YES
chr10	33489318	33565567	TCONS_00008502	1000	-	0	0	0	7	948,200,175,205,179,213,107,	0,4498,6974,7882,15821,66236,76142,	YES
chr10	33489318	33565567	TCONS_00008503	1000	-	0	0	0	7	948,200,160,205,179,213,107,	0,4498,6974,7882,15821,66236,76142,	YES
chr10	33489611	33513683	TCONS_00008504	1000	-	0	0	0	6	655,200,175,205,179,193,	0,4205,6681,7589,15528,23879,	YES
chr10	33489694	33513711	TCONS_00008505	1000	-	0	0	0	6	572,200,160,205,179,221,	0,4122,6598,7506,15445,23796,	YES
chr10	33489694	33565567	TCONS_00008506	1000	-	0	0	0	6	572,200,175,205,179,107,	0,4122,6598,7506,15445,75766,	YES
chr10	33601184	33608064	TCONS_00007176	1000	+	0	0	0	2	109,4860,	0,2020,	YES
chr10	33612286	33615507	TCONS_00008511	1000	-	0	0	0	2	604,498,	0,2723,	YES
chr10	33612286	33615528	TCONS_00008512	1000	-	0	0	0	3	604,273,41,	0,2723,3201,	YES
chr10	33612286	33618550	TCONS_00008513	1000	-	0	0	0	3	604,273,204,	0,2723,6060,	YES
chr10	33612286	33627142	TCONS_00008514	1000	-	0	0	0	3	604,273,105,	0,2723,14751,	YES
chr10	33612287	33615586	TCONS_00008515	1000	-	0	0	0	3	603,273,99,	0,2722,3200,	YES
chr10	33617970	33627178	TCONS_00007178	1000	+	0	0	0	9	478,244,158,134,132,67,61,61,182,	0,681,1340,1627,1835,6844,6980,7579,9026,	YES
chr10	33617970	33627299	TCONS_00007179	1000	+	0	0	0	9	476,246,158,134,132,67,61,61,303,	0,679,1340,1627,1835,6844,6980,7579,9026,	YES
chr10	3372151	3390047	TCONS_00007705	1000	-	0	0	0	17	1576,123,111,98,66,244,126,152,100,181,90,208,113,173,90,112,61,	0,3154,3406,3592,4690,5832,6630,7211,7445,10667,11570,12394,14168,14363,16183,17069,17835,	YES
chr10	3372151	3401792	TCONS_00007706	1000	-	0	0	0	24	1576,147,111,98,66,130,244,126,152,100,181,90,208,113,173,90,112,79,108,75,119,139,86,92,	0,3154,3406,3592,4690,5489,5832,6630,7211,7445,10667,11570,12394,14168,14363,16183,17069,18631,18790,18990,21167,21383,23481,29549,	YES
chr10	33764410	33806638	TCONS_00008516	1000	-	0	0	0	25	1624,153,119,187,156,291,177,83,137,198,115,180,77,49,51,125,68,124,123,88,117,41,102,82,232,	0,2913,5891,8246,9451,10731,11407,13447,19561,21565,21958,23919,24189,25533,25713,25989,28442,28601,31146,31865,34106,34629,37314,40470,41996,	YES
chr10	33764410	33806638	TCONS_00008517	1000	-	0	0	0	25	1624,153,119,187,156,291,177,83,137,198,115,180,77,82,51,125,68,124,123,88,117,41,102,82,232,	0,2913,5891,8246,9451,10731,11407,13447,19561,21565,21958,23919,24189,25533,25713,25989,28442,28601,31146,31865,34106,34629,37314,40470,41996,	YES
chr10	33764410	33835091	TCONS_00008518	1000	-	0	0	0	34	1624,153,119,187,156,291,177,83,137,198,115,180,77,82,51,125,68,124,123,88,117,41,102,82,397,257,92,133,85,167,135,194,193,57,	0,2913,5891,8246,9451,10731,11407,13447,19561,21565,21958,23919,24189,25533,25713,25989,28442,28601,31146,31865,34106,34629,37314,40470,49015,51408,51754,53669,54789,56773,60796,65123,67536,70624,	YES
chr10	33765975	33804901	TCONS_00008519	1000	-	0	0	0	24	59,153,119,187,156,291,177,83,137,198,115,180,77,82,51,125,68,124,123,88,117,41,102,21,	0,1348,4326,6681,7886,9166,9842,11882,17996,20000,20393,22354,22624,23968,24148,24424,26877,27036,29581,30300,32541,33064,35749,38905,	YES
chr10	33811719	33835089	TCONS_00008520	1000	-	0	0	0	9	2103,257,92,133,85,167,194,193,55,	0,4099,4445,6360,7480,9464,17814,20227,23315,	YES
chr10	33811720	33832143	TCONS_00008521	1000	-	0	0	0	8	2102,257,92,133,85,167,194,197,	0,4098,4444,6359,7479,9463,17813,20226,	YES
chr10	33811720	33835091	TCONS_00008522	1000	-	0	0	0	4	2102,84,185,57,	0,4098,20234,23314,	YES
chr10	33821240	33832141	TCONS_00008523	1000	-	0	0	0	4	110,135,194,195,	0,3966,8293,10706,	YES
chr10	33836376	33845408	TCONS_00008524	1000	-	0	0	0	4	1543,179,170,439,	0,5012,5368,8593,	YES
chr10	33836383	33845408	TCONS_00008525	1000	-	0	0	0	4	1536,179,170,439,	0,5005,5361,8586,	YES
chr10	33853088	34111586	TCONS_00008526	1000	-	0	0	0	25	5488,179,87,189,279,160,333,464,45,102,729,97,52,59,165,105,49,67,68,163,138,79,48,111,69,	0,8734,8957,14407,22104,38203,40981,45710,46262,52134,65127,71392,73267,76588,81537,83860,86739,111666,111837,113816,119110,129676,150542,191219,258429,	YES
chr10	33853088	34111586	TCONS_00008527	1000	-	0	0	0	24	5488,310,189,279,160,333,464,102,81,729,97,52,59,165,105,49,67,68,163,138,79,48,111,69,	0,8734,14407,22104,38203,40981,45710,52134,57236,65127,71392,73267,76588,81537,83860,86739,111666,111837,113816,119110,129676,150542,191219,258429,	YES
chr10	33853088	34111624	TCONS_00008528	1000	-	0	0	0	27	5488,179,87,189,279,160,333,464,45,87,102,81,729,97,52,59,165,105,49,67,68,163,138,79,48,111,107,	0,8734,8957,14407,22104,38203,40981,45710,46262,49641,52134,57236,65127,71392,73267,76588,81537,83860,86739,111666,111837,113816,119110,129676,150542,191219,258429,	YES
chr10	33853088	34111642	TCONS_00008529	1000	-	0	0	0	24	5488,179,87,189,279,160,333,464,102,729,97,52,59,165,105,49,67,68,163,138,79,48,111,125,	0,8734,8957,14407,22104,38203,40981,45710,52134,65127,71392,73267,76588,81537,83860,86739,111666,111837,113816,119110,129676,150542,191219,258429,	YES
chr10	33853323	33875481	TCONS_00008530	1000	-	0	0	0	5	5253,179,87,189,289,	0,8499,8722,14172,21869,	YES
chr10	33853801	34111580	TCONS_00008531	1000	-	0	0	0	26	4775,310,189,279,160,333,464,45,87,102,81,729,97,52,59,165,105,49,67,68,163,138,79,48,111,63,	0,8021,13694,21391,37490,40268,44997,45549,48928,51421,56523,64414,70679,72554,75875,80824,83147,86026,110953,111124,113103,118397,128963,149829,190506,257716,	YES
chr10	3405372	3423760	TCONS_00007707	1000	-	0	0	0	14	449,287,169,115,93,132,83,190,150,63,92,87,51,219,	0,2216,5853,8288,10094,10297,12309,14548,16328,16567,16714,17862,18032,18169,	YES
chr10	34126652	34134708	TCONS_00007183	1000	+	0	0	0	7	58,87,76,105,79,49,221,	0,2131,2308,5412,7414,7586,7835,	YES
chr10	34134253	34134704	TCONS_00008533	1000	-	0	0	0	2	29,221,	0,230,	NO
chr10	34198945	34280003	TCONS_00008538	1000	-	0	0	0	6	1150,80,144,103,76,191,	0,2083,3793,4101,4386,80867,	YES
chr10	34198946	34206556	TCONS_00008539	1000	-	0	0	0	6	1149,80,174,103,76,92,	0,2082,3792,4100,4385,7518,	YES
chr10	34198946	34279922	TCONS_00008540	1000	-	0	0	0	6	1149,80,174,103,76,110,	0,2082,3792,4100,4385,80866,	YES
chr10	3420050	3423655	TCONS_00007708	1000	-	0	0	0	6	60,150,63,92,221,114,	0,1650,1889,2036,3184,3491,	YES
chr10	34208823	34221758	TCONS_00008541	1000	-	0	0	0	7	535,153,127,152,185,125,433,	0,2629,4448,9116,9350,10004,12502,	YES
chr10	34208823	34225569	TCONS_00008542	1000	-	0	0	0	7	535,153,127,152,185,125,45,	0,2629,4448,9116,9350,10004,16701,	YES
chr10	34208823	34293825	TCONS_00008543	1000	-	0	0	0	8	535,153,127,152,185,125,78,240,	0,76364,78156,79779,80013,80668,84569,84762,	YES
chr10	34208823	34293825	TCONS_00008544	1000	-	0	0	0	8	535,153,127,152,185,125,78,199,	0,2629,4448,9116,9350,10004,84569,84803,	YES
chr10	34249729	34257393	TCONS_00008545	1000	-	0	0	0	7	18,153,154,94,40,21,15,	0,1324,1545,3275,4264,6372,7649,	YES
chr10	34257605	34370562	TCONS_00008546	1000	-	0	0	0	14	4949,277,128,105,157,116,65,109,118,117,102,120,96,270,	0,12764,16908,88996,89264,95711,96237,97782,99043,102289,102565,111049,111384,112687,	YES
chr10	34257605	34370929	TCONS_00008547	1000	-	0	0	0	13	4949,277,128,105,157,116,65,109,118,102,120,96,637,	0,12764,16908,17155,17423,95711,96237,97782,99043,102565,111049,111384,112687,	YES
chr10	34257605	34371325	TCONS_00008548	1000	-	0	0	0	14	4949,277,128,105,157,116,65,109,118,117,102,120,96,1033,	0,84559,88751,88996,89264,95711,96237,97782,99043,102289,102565,111049,111384,112687,	YES
chr10	34257605	34371325	TCONS_00008549	1000	-	0	0	0	14	4949,277,128,105,157,116,65,109,118,117,102,120,96,1033,	0,12764,16908,17155,89264,95711,96237,97782,99043,102289,102565,111049,111384,112687,	YES
chr10	34257605	34371325	TCONS_00008550	1000	-	0	0	0	15	4949,277,128,105,157,116,65,109,118,117,102,120,96,255,638,	0,12764,16908,17155,17423,95711,96237,97782,99043,102289,102565,111049,111384,112687,113082,	YES
chr10	3427333	3435132	TCONS_00007709	1000	-	0	0	0	5	964,108,21,193,325,	0,1140,2447,6386,7474,	YES
chr10	3427333	3435132	TCONS_00007710	1000	-	0	0	0	4	964,108,193,325,	0,1140,6386,7474,	YES
chr10	3427989	3435091	TCONS_00007711	1000	-	0	0	0	5	308,108,21,193,284,	0,484,1791,5730,6818,	YES
chr10	34282891	34293825	TCONS_00008551	1000	-	0	0	0	7	535,153,127,152,185,125,433,	0,2296,4088,5711,5945,6600,10501,	YES
chr10	34282891	34293869	TCONS_00008552	1000	-	0	0	0	8	535,153,127,152,185,125,322,55,	0,2296,4088,5711,5945,6600,10501,10923,	YES
chr10	3429682	3434860	TCONS_00007712	1000	-	0	0	0	3	119,193,53,	0,4037,5125,	YES
chr10	34322036	34329698	TCONS_00008553	1000	-	0	0	0	7	18,153,154,94,40,21,15,	0,1324,1545,3270,4264,6368,7647,	YES
chr10	34332331	34371325	TCONS_00008554	1000	-	0	0	0	14	2051,277,128,105,157,116,65,109,118,117,102,120,96,1033,	0,9833,14025,14270,14538,20985,21511,23056,24317,27563,27839,36323,36658,37961,	YES
chr10	3435695	3460177	TCONS_00006318	1000	+	0	0	0	16	206,123,195,193,120,114,97,80,159,132,155,68,152,113,101,1915,	0,2634,6638,6974,8063,8381,8585,8779,10714,13488,13705,16045,17533,18295,20749,22567,	YES
chr10	34397440	34407792	TCONS_00008555	1000	-	0	0	0	8	13,520,133,43,75,177,90,42,	0,336,983,1220,3901,4158,6161,10310,	YES
chr10	34397774	34407792	TCONS_00008556	1000	-	0	0	0	7	522,133,43,75,177,90,42,	0,649,886,3567,3824,5827,9976,	YES
chr10	34411269	34420292	TCONS_00007187	1000	+	0	0	0	9	147,169,84,110,126,78,100,152,447,	0,2179,3199,3827,4406,4646,6327,6875,8576,	YES
chr10	34422003	34431697	TCONS_00007188	1000	+	0	0	0	13	301,89,97,284,164,147,81,103,50,109,85,136,1704,	0,386,573,3413,4849,5130,5654,5821,6323,6496,6706,6883,7990,	YES
chr10	34422172	34425917	TCONS_00007189	1000	+	0	0	0	5	132,89,97,406,90,	0,217,404,3244,3655,	YES
chr10	34434993	34568346	TCONS_00007190	1000	+	0	0	0	104	223,120,21,75,79,113,100,97,75,157,165,122,190,136,96,119,134,242,193,217,105,104,84,160,148,206,175,209,359,130,161,163,87,227,445,567,201,112,141,274,115,133,95,136,187,112,121,170,221,91,141,164,79,90,141,78,76,124,116,68,122,50,61,127,112,82,131,321,241,88,93,171,60,135,113,97,107,52,93,100,80,77,74,81,89,129,105,82,1292,71,169,87,255,131,43,137,61,147,135,157,65,101,52,475,	0,7259,8639,9902,11858,12022,12225,13080,13313,14800,15035,15453,17078,17396,17635,18716,18918,20136,21907,22741,23110,27315,27508,28385,28798,29180,30261,30513,32973,33413,34965,35595,36818,36999,40649,44115,46181,46925,54129,54363,54713,55205,57843,58010,59281,59630,59830,60522,60840,61169,61356,62982,63238,63478,63658,63992,65191,65380,65581,65773,66353,66624,66847,68292,68491,68683,68851,7061…	YES
chr10	34434993	34568619	TCONS_00007191	1000	+	0	0	0	104	223,120,21,75,79,113,100,97,75,157,165,122,190,136,96,119,134,242,193,217,105,104,84,160,148,206,175,209,359,130,161,163,87,227,445,567,201,112,141,274,115,133,95,136,187,112,121,170,221,91,141,164,79,90,141,78,76,124,116,68,122,50,61,127,112,82,131,321,241,88,93,171,60,135,113,97,107,52,75,100,80,77,74,81,89,129,105,82,1292,71,169,87,255,131,43,137,61,147,135,157,65,101,52,748,	0,7259,8639,9902,11858,12022,12225,13080,13313,14800,15035,15453,17078,17396,17635,18716,18918,20136,21907,22741,23110,27315,27508,28385,28798,29180,30261,30513,32973,33413,34965,35595,36818,36999,40649,44115,46181,46925,54129,54363,54713,55205,57843,58010,59281,59630,59830,60522,60840,61169,61356,62982,63238,63478,63658,63992,65191,65380,65581,65773,66353,66624,66847,68292,68491,68683,68851,7061…	YES
chr10	34434993	34590034	TCONS_00007192	1000	+	0	0	0	106	223,120,102,21,75,79,113,100,97,75,157,165,122,190,136,96,119,134,242,193,217,105,104,84,160,148,206,175,209,359,130,161,163,87,227,445,567,201,112,141,274,115,133,95,136,187,112,121,170,221,91,141,164,79,90,141,78,76,124,116,68,122,50,61,127,112,82,131,321,241,88,93,171,60,135,113,97,107,52,93,100,80,77,74,81,89,129,105,82,1292,71,169,87,255,131,43,137,61,147,135,157,65,101,52,111,33,	0,7259,7466,8639,9902,11858,12022,12225,13080,13313,14800,15035,15453,17078,17396,17635,18716,18918,20136,21907,22741,23110,27315,27508,28385,28798,29180,30261,30513,32973,33413,34965,35595,36818,36999,40649,44115,46181,46925,54129,54363,54713,55205,57843,58010,59281,59630,59830,60522,60840,61169,61356,62982,63238,63478,63658,63992,65191,65380,65581,65773,66353,66624,66847,68292,68491,68683,68851…	YES
chr10	34435168	34568619	TCONS_00007193	1000	+	0	0	0	105	48,120,102,21,75,79,113,100,97,75,157,165,122,190,136,96,119,134,242,193,217,105,104,84,160,148,206,175,209,359,130,161,163,87,227,445,567,201,112,141,274,115,133,95,136,187,112,121,170,221,91,141,164,79,90,141,78,76,124,116,68,122,50,61,127,112,82,131,321,241,88,93,171,60,135,113,97,107,52,75,100,80,77,74,81,89,129,105,82,1292,71,169,87,255,131,43,137,61,147,135,157,65,101,52,748,	0,7084,7291,8464,9727,11683,11847,12050,12905,13138,14625,14860,15278,16903,17221,17460,18541,18743,19961,21732,22566,22935,27140,27333,28210,28623,29005,30086,30338,32798,33238,34790,35420,36643,36824,40474,43940,46006,46750,53954,54188,54538,55030,57668,57835,59106,59455,59655,60347,60665,60994,61181,62807,63063,63303,63483,63817,65016,65205,65406,65598,66178,66449,66672,68117,68316,68508,68676…	YES
chr10	34602119	34607444	TCONS_00007194	1000	+	0	0	0	8	74,168,68,159,132,96,68,360,	0,2553,3179,3327,3796,4032,4662,4965,	YES
chr10	34602119	34607444	TCONS_00007195	1000	+	0	0	0	8	74,160,168,68,159,132,96,663,	0,338,2553,3179,3327,3796,4032,4662,	YES
chr10	34602155	34607444	TCONS_00007196	1000	+	0	0	0	7	462,168,68,159,132,96,663,	0,2517,3143,3291,3760,3996,4626,	YES
chr10	34616996	34622392	TCONS_00007197	1000	+	0	0	0	5	285,67,123,103,712,	0,558,1724,1956,4684,	YES
chr10	34641110	34647224	TCONS_00008564	1000	-	0	0	0	8	2192,55,169,127,128,136,56,529,	0,3288,3423,3670,4697,4909,5360,5585,	YES
chr10	34641110	34650021	TCONS_00008565	1000	-	0	0	0	9	2192,160,169,127,128,136,56,293,222,	0,3183,3423,3670,4697,4909,5360,5585,8689,	YES
chr10	34641110	34650021	TCONS_00008566	1000	-	0	0	0	9	2192,157,169,127,128,136,56,293,222,	0,3183,3423,3670,4697,4909,5360,5585,8689,	YES
chr10	34641110	34650194	TCONS_00008567	1000	-	0	0	0	9	2192,55,169,127,128,136,56,293,395,	0,3288,3423,3670,4697,4909,5360,5585,8689,	YES
chr10	34642658	34650021	TCONS_00008568	1000	-	0	0	0	9	644,55,169,127,128,136,56,293,222,	0,1740,1875,2122,3149,3361,3812,4037,7141,	YES
chr10	34730723	34738502	TCONS_00007201	1000	+	0	0	0	3	102,145,461,	0,1865,7318,	YES
chr10	347873	363556	TCONS_00007614	1000	-	0	0	0	19	379,825,342,402,119,156,165,214,177,137,171,150,222,238,266,153,176,75,103,	0,962,2299,3956,4578,4807,5101,5361,5656,6352,9033,9348,9705,11202,11824,12285,13814,15001,15580,	YES
chr10	347873	363556	TCONS_00007615	1000	-	0	0	0	18	379,837,342,402,119,156,214,177,137,171,150,222,238,266,153,176,75,103,	0,962,2299,3956,4578,4807,5361,5656,6352,9033,9348,9705,11202,11824,12285,13814,15001,15580,	YES
chr10	3488854	3522704	TCONS_00006319	1000	+	0	0	0	16	154,130,84,163,39,204,153,80,75,110,127,57,149,82,97,4460,	0,3827,6526,12635,14550,14689,19471,22635,22831,23032,25481,25698,26397,26726,26984,29390,	YES
chr10	3488895	3522704	TCONS_00006320	1000	+	0	0	0	16	113,130,84,163,39,201,153,80,75,110,127,57,149,82,97,4460,	0,3786,6485,12594,14509,14651,19430,22594,22790,22991,25440,25657,26356,26685,26943,29349,	YES
chr10	34899156	35026412	TCONS_00007204	1000	+	0	0	0	62	39,191,54,140,91,80,81,169,93,99,102,104,109,87,172,133,108,235,186,87,260,190,125,58,92,173,161,111,155,100,172,257,147,169,91,83,151,104,186,202,152,188,95,614,98,177,141,183,165,75,168,210,147,161,211,150,99,84,18,111,203,1378,	0,31315,36587,37282,39074,40962,41244,45981,46235,46572,48618,50715,51008,52976,53303,53577,53921,57113,57439,59450,59666,61870,62147,63667,63906,64148,66413,70798,71225,71481,72570,72899,73701,73930,75288,75702,77192,78682,81827,85754,86800,87811,88113,89708,102985,103391,103676,103920,106298,106617,108196,111126,112984,115211,115454,116321,116586,118868,119703,119993,123514,125878,	YES
chr10	34899156	35026412	TCONS_00007205	1000	+	0	0	0	62	39,191,54,140,91,80,81,169,93,99,102,104,109,87,172,133,108,235,186,87,260,190,125,58,92,173,161,111,155,100,172,257,147,169,91,83,151,104,186,202,122,188,95,614,98,177,141,183,165,75,168,210,147,161,211,150,99,84,18,111,203,1378,	0,31315,36587,37282,39074,40962,41244,45981,46235,46572,48618,50715,51008,52976,53303,53577,53921,57113,57439,59450,59666,61870,62147,63667,63906,64148,66413,70798,71225,71481,72570,72899,73701,73930,75288,75702,77192,78682,81827,85754,86830,87811,88113,89708,102985,103391,103676,103920,106298,106617,108196,111126,112984,115211,115454,116321,116586,118868,119703,119993,123514,125878,	YES
chr10	34908139	35026412	TCONS_00007206	1000	+	0	0	0	61	350,191,54,140,91,80,81,169,93,99,102,104,109,87,172,133,108,235,186,87,260,190,125,58,92,173,161,111,155,100,172,257,249,169,91,83,151,104,186,202,122,188,95,614,98,177,141,183,165,75,168,210,147,161,211,150,99,84,111,203,1378,	0,22332,27604,28299,30091,31979,32261,36998,37252,37589,39635,41732,42025,43993,44320,44594,44938,48130,48456,50467,50683,52887,53164,54684,54923,55165,57430,61815,62242,62498,63587,63916,64616,64947,66305,66719,68209,69699,72844,76771,77847,78828,79130,80725,94002,94408,94693,94937,97315,97634,99213,102143,104001,106228,106471,107338,107603,109885,111010,114531,116895,	YES
chr10	34908319	35026412	TCONS_00007207	1000	+	0	0	0	61	170,191,54,140,91,80,81,169,93,129,102,104,109,87,172,133,108,235,186,87,260,190,125,58,92,173,161,111,155,100,172,257,249,169,91,83,151,104,186,202,152,188,95,614,98,177,141,183,165,75,168,210,147,161,211,150,99,84,111,203,1378,	0,22152,27424,28119,29911,31799,32081,36818,37072,37409,39455,41552,41845,43813,44140,44414,44758,47950,48276,50287,50503,52707,52984,54504,54743,54985,57250,61635,62062,62318,63407,63736,64436,64767,66125,66539,68029,69519,72664,76591,77637,78648,78950,80545,93822,94228,94513,94757,97135,97454,99033,101963,103821,106048,106291,107158,107423,109705,110830,114351,116715,	YES
chr10	349150	363553	TCONS_00007616	1000	-	0	0	0	18	510,342,402,119,156,165,214,177,137,141,42,150,238,266,153,176,75,100,	0,1022,2679,3301,3530,3824,4084,4379,5075,7756,7974,8071,9925,10547,11008,12537,13724,14303,	YES
chr10	349150	363556	TCONS_00007617	1000	-	0	0	0	17	510,342,119,151,165,214,177,137,171,150,222,238,266,153,176,75,103,	0,1022,3301,3530,3824,4084,4379,5075,7756,8071,8428,9925,10547,11008,12537,13724,14303,	YES
chr10	349150	363556	TCONS_00007618	1000	-	0	0	0	16	522,342,226,156,214,177,137,171,150,222,238,266,153,176,75,103,	0,1022,2679,3530,4084,4379,5075,7756,8071,8428,9925,10547,11008,12537,13724,14303,	YES
chr10	349150	363556	TCONS_00007619	1000	-	0	0	0	17	510,342,402,119,156,214,177,137,171,150,222,238,266,153,176,75,103,	0,1022,2679,3301,3530,4084,4379,5075,7756,8071,8428,9925,10547,11008,12537,13724,14303,	YES
chr10	34923596	35025418	TCONS_00007208	1000	+	0	0	0	61	189,191,54,140,91,80,81,169,93,129,102,104,109,87,172,133,108,235,186,87,302,190,125,58,92,173,161,111,155,100,172,257,249,169,91,83,151,104,186,202,152,188,95,614,98,177,141,183,165,75,168,210,147,161,211,150,99,84,111,203,384,	0,6875,12147,12842,14634,16522,16804,21541,21795,22132,24178,26275,26568,28536,28863,29137,29481,32673,32999,35010,35184,37430,37707,39227,39466,39708,41973,46358,46785,47041,48130,48459,49159,49490,50848,51262,52752,54242,57387,61314,62360,63371,63673,65268,78545,78951,79236,79480,81858,82177,83756,86686,88544,90771,91014,91881,92146,94428,95553,99074,101438,	YES
chr10	34923596	35026412	TCONS_00007209	1000	+	0	0	0	61	189,191,54,140,91,80,81,169,93,129,102,104,109,87,172,133,108,235,186,87,302,190,125,58,92,173,161,111,155,100,172,257,249,169,91,83,151,104,186,202,152,188,95,614,98,177,141,183,165,75,168,210,147,161,211,150,99,84,111,203,1378,	0,6875,12147,12842,14634,16522,16804,21541,21795,22132,24178,26275,26568,28536,28863,29137,29481,32673,32999,35010,35184,37430,37707,39227,39466,39708,41973,46358,46785,47041,48130,48459,49159,49490,50848,51262,52752,54242,57387,61314,62360,63371,63673,65268,78545,78951,79236,79480,81858,82177,83756,86686,88544,90771,91014,91881,92146,94428,95553,99074,101438,	YES
chr10	34923596	35026412	TCONS_00007210	1000	+	0	0	0	61	189,191,54,140,91,80,81,169,93,99,102,104,109,87,172,133,108,235,186,87,260,190,125,58,92,173,161,111,155,100,172,257,147,169,91,83,151,104,186,202,152,188,95,614,98,177,141,183,165,75,168,210,147,161,211,150,99,84,111,203,1378,	0,6875,12147,12842,14634,16522,16804,21541,21795,22132,24178,26275,26568,28536,28863,29137,29481,32673,32999,35010,35226,37430,37707,39227,39466,39708,41973,46358,46785,47041,48130,48459,49261,49490,50848,51262,52752,54242,57387,61314,62360,63371,63673,65268,78545,78951,79236,79480,81858,82177,83756,86686,88544,90771,91014,91881,92146,94428,95553,99074,101438,	YES
chr10	34923596	35026412	TCONS_00007211	1000	+	0	0	0	63	189,191,54,140,91,80,81,169,93,99,102,104,109,87,172,133,108,235,186,87,260,190,125,58,92,173,161,111,155,100,172,257,147,169,91,83,151,104,186,202,122,188,95,614,98,177,141,183,165,75,168,9,210,147,161,211,150,99,84,18,111,203,1378,	0,6875,12147,12842,14634,16522,16804,21541,21795,22132,24178,26275,26568,28536,28863,29137,29481,32673,32999,35010,35226,37430,37707,39227,39466,39708,41973,46358,46785,47041,48130,48459,49261,49490,50848,51262,52752,54242,57387,61314,62390,63371,63673,65268,78545,78951,79236,79480,81858,82177,83756,84504,86686,88544,90771,91014,91881,92146,94428,95263,95553,99074,101438,	YES
chr10	34923596	35026412	TCONS_00007212	1000	+	0	0	0	62	189,191,54,140,91,80,81,169,93,99,102,104,109,87,172,133,108,235,186,87,260,190,125,58,92,173,161,111,155,100,172,257,147,169,91,83,151,104,186,202,152,188,95,614,98,177,141,183,165,75,168,210,147,161,211,150,99,84,18,111,203,1378,	0,6875,12147,12842,14634,16522,16804,21541,21795,22132,24178,26275,26568,28536,28863,29137,29481,32673,32999,35010,35226,37430,37707,39227,39466,39708,41973,46358,46785,47041,48130,48459,49261,49490,50848,51262,52752,54242,57387,61314,62360,63371,63673,65268,78545,78951,79236,79480,81858,82177,83756,86686,88544,90771,91014,91881,92146,94428,95263,95553,99074,101438,	YES
chr10	34928212	35026412	TCONS_00007213	1000	+	0	0	0	61	278,191,54,140,91,80,81,169,93,99,102,104,109,87,172,133,108,235,186,87,260,190,125,58,92,173,161,111,155,100,172,257,147,169,91,83,151,104,186,202,122,188,95,614,98,177,141,183,165,75,168,210,147,161,211,150,99,84,111,203,1378,	0,2259,7531,8226,10018,11906,12188,16925,17179,17516,19562,21659,21952,23920,24247,24521,24865,28057,28383,30394,30610,32814,33091,34611,34850,35092,37357,41742,42169,42425,43514,43843,44645,44874,46232,46646,48136,49626,52771,56698,57774,58755,59057,60652,73929,74335,74620,74864,77242,77561,79140,82070,83928,86155,86398,87265,87530,89812,90937,94458,96822,	YES
chr10	34930545	35026412	TCONS_00007214	1000	+	0	0	0	62	117,54,140,91,80,81,169,93,99,102,104,109,87,172,133,108,235,186,87,260,190,125,58,92,173,161,111,155,100,172,257,147,169,91,83,151,104,186,202,122,188,95,614,98,177,141,183,165,75,168,9,210,147,161,211,150,99,84,18,111,203,1378,	0,5198,5893,7685,9573,9855,14592,14846,15183,17229,19326,19619,21587,21914,22188,22532,25724,26050,28061,28277,30481,30758,32278,32517,32759,35024,39409,39836,40092,41181,41510,42312,42541,43899,44313,45803,47293,50438,54365,55441,56422,56724,58319,71596,72002,72287,72531,74909,75228,76807,77555,79737,81595,83822,84065,84932,85197,87479,88314,88604,92125,94489,	YES
chr10	349407	363553	TCONS_00007620	1000	-	0	0	0	18	265,342,402,119,156,165,214,177,137,171,150,222,238,266,153,176,75,100,	0,765,2422,3044,3273,3567,3827,4122,4818,7499,7814,8171,9668,10290,10751,12280,13467,14046,	YES
chr10	35028460	35030467	TCONS_00008571	1000	-	0	0	0	4	301,75,93,627,	0,797,976,1380,	YES
chr10	35029337	35030546	TCONS_00008572	1000	-	0	0	0	3	23,93,706,	0,99,503,	YES
chr10	35029725	35050138	TCONS_00007216	1000	+	0	0	0	6	411,933,511,269,1126,344,	0,9050,12481,14494,16579,20069,	YES
chr10	35029725	35050138	TCONS_00007217	1000	+	0	0	0	6	411,933,511,269,1126,341,	0,9050,12481,14494,16579,20072,	YES
chr10	35039042	35050132	TCONS_00007218	1000	+	0	0	0	5	666,511,269,1126,338,	0,3164,5177,7262,10752,	YES
chr10	35052535	35061737	TCONS_00008573	1000	-	0	0	0	8	248,118,137,182,98,68,138,219,	0,328,755,2984,3248,7383,8561,8983,	YES
chr10	35052538	35061737	TCONS_00008574	1000	-	0	0	0	9	245,70,99,137,182,98,68,138,219,	0,325,523,752,2981,3245,7380,8558,8980,	YES
chr10	35060564	35061703	TCONS_00008575	1000	-	0	0	0	2	670,185,	0,954,	YES
chr10	35071912	35074946	TCONS_00008576	1000	-	0	0	0	7	101,174,376,51,95,450,238,	0,187,661,1157,1382,1836,2796,	NO
chr10	35087358	35095473	TCONS_00008577	1000	-	0	0	0	7	101,174,376,51,95,444,238,	0,187,661,1157,1382,1835,7877,	YES
chr10	35101084	35114188	TCONS_00007220	1000	+	0	0	0	7	138,195,33,105,83,96,166,	0,8030,8329,11841,12021,12757,12938,	NO
chr10	35114942	35117966	TCONS_00008578	1000	-	0	0	0	7	101,174,376,51,95,444,238,	0,187,661,1157,1382,1835,2786,	NO
chr10	35120097	35175085	TCONS_00007221	1000	+	0	0	0	8	90,195,18,15,109,70,83,163,	0,49204,51533,51774,51853,52045,54657,54825,	YES
chr10	35128914	35132327	TCONS_00007222	1000	+	0	0	0	6	183,33,109,70,96,163,	0,283,2151,2343,3069,3250,	YES
[truncated: 48,624 more rows]

## Sheet: Table 5
Supplementary Table 5. H3K4me3 peaks
[truncated: 44,039 more rows]

## Sheet: Table 6
Supplementary Table 6. Novel intergenic TCs
[truncated: 460 more rows]

[truncated: 7 more sheets: Table 7, Table 8, Table 9, Table 10, Table 11, Table 12, Table 13]
